# Supplementary material for: Analysis of Gene Expression Networks in Primary Central Nervous System Tumors for Drug Repurposing Prospects
Source: Preprints.org preprint supplement (doi:10.20944/preprints202308.2027.v1), 2023-08-30
Supplement: Supplementary file 1 [file supplementary]

## Sheet: ATRT
Differentially Expressed Genes in ATRT (Figure A4a)
Probe ID	Gene symbol	Gene description	log2(fold change)	-LOG10(Pvalue)
1053_at	RFC2	replication factor C subunit 2	1.261	5.404
1255_g_at	GUCA1A	guanylate cyclase activator 1A	-2.084	6.032
1405_i_at	CCL5	C-C motif chemokine ligand 5	1.07	2.317
1552277_a_at	MSANTD3	Myb/SANT DNA binding domain containing 3	1.466	7.323
1552301_a_at	CORO6	coronin 6	-3.577	7.073
1552306_at	ALG10	ALG10, alpha-1,2-glucosyltransferase	1.866	8.338
1552316_a_at	GIMAP1	GTPase, IMAP family member 1	-1.442	2.956
1552320_a_at	CCDC65	coiled-coil domain containing 65	1.163	3.249
1552323_s_at	FAM122C	family with sequence similarity 122C	1.466	2.337
1552388_at	FLJ30901///SCUBE1	uncharacterized protein FLJ30901///signal peptide, CUB domain and EGF like domain containing 1	2.637	2.439
1552389_at	ERICH5	glutamate rich 5	1.27	2.996
1552400_a_at	TMEM266	transmembrane protein 266	-1.36	2.215
1552422_at	C10orf25	chromosome 10 open reading frame 25	2.903	7.718
1552504_a_at	BRSK1	BR serine/threonine kinase 1	-1.526	2.667
1552521_a_at	TMEM74	transmembrane protein 74	-2.055	4.447
1552523_a_at	TIGD4	tigger transposable element derived 4	1.455	9.342
1552532_a_at	ATP6V1C2	ATPase H+ transporting V1 subunit C2	1.091	2.582
1552557_a_at	ZDHHC15	zinc finger DHHC-type containing 15	2.604	8.674
1552641_s_at	ATAD3B///ATAD3A	ATPase family, AAA domain containing 3B///ATPase family, AAA domain containing 3A	1.254	4.396
1552689_at	CASKIN1	CASK interacting protein 1	-4.857	15.138
1552714_at	CREG2	cellular repressor of E1A stimulated genes 2	-4.792	5.275
1552716_at	SPEF2	sperm flagellar 2	1.275	5.179
1552717_s_at	CEP170P1///CEP170	centrosomal protein 170 pseudogene 1///centrosomal protein 170	2.63	3.736
1552733_at	KLHDC1	kelch domain containing 1	-1.363	4.102
1552735_at	PCDHGA4	protocadherin gamma subfamily A, 4	2.682	3.729
1552736_a_at	NETO1	neuropilin and tolloid like 1	-2.018	2.017
1552742_at	KCNH8	potassium voltage-gated channel subfamily H member 8	-1.732	2.454
1552767_a_at	HS6ST2	heparan sulfate 6-O-sulfotransferase 2	-1.775	2.127
1552785_at	ZNF781	zinc finger protein 781	1.23	3.93
1552846_s_at	RAB42	RAB42, member RAS oncogene family	1.313	4.351
1552879_a_at	ATOH7	atonal bHLH transcription factor 7	-1.71	5.393
1552897_a_at	KCNG3	potassium voltage-gated channel modifier subfamily G member 3	-1.612	2.362
1552937_s_at	ATRIP///TREX1	ATR interacting protein///three prime repair exonuclease 1	1.245	6.254
1552946_at	ZNF114	zinc finger protein 114	1.852	5.67
1552953_a_at	NEUROD2	neuronal differentiation 2	-3.236	5.449
1552977_a_at	CNPY3	canopy FGF signaling regulator 3	1.182	3.677
1553011_at	TAF1L	TATA-box binding protein associated factor 1 like	1.039	3.939
1553013_at	CNTNAP5	contactin associated protein like 5	-4.158	10.054
1553099_at	TIGD1	tigger transposable element derived 1	1.031	2.893
1553113_s_at	CDK8	cyclin dependent kinase 8	1.181	1.848
1553126_a_at	SLC39A12	solute carrier family 39 member 12	-6.635	12.425
1553162_x_at	PROSER3	proline and serine rich 3	1.448	4.66
1553180_at	ADAMTS19	ADAM metallopeptidase with thrombospondin type 1 motif 19	1.131	1.825
1553229_at	ZNF572	zinc finger protein 572	1.462	4.83
1553254_at	MAGEE2	MAGE family member E2	-2.242	4.113
1553286_at	ZNF555	zinc finger protein 555	1.694	7.069
1553288_a_at	NYAP1	neuronal tyrosine phosphorylated phosphoinositide-3-kinase adaptor 1	-2.846	4.312
1553292_s_at	SGK494	uncharacterized serine/threonine-protein kinase SgK494	-2.382	3.343
1553357_at	LINC00889	long intergenic non-protein coding RNA 889	-4.54	6.275
1553410_a_at	ABCC12	ATP binding cassette subfamily C member 12	-1.693	5.18
1553415_at	SLC17A8	solute carrier family 17 member 8	2.752	3.857
1553420_at	SATB2-AS1	SATB2 antisense RNA 1	-1.365	5.949
1553440_at	AQP4-AS1	AQP4 antisense RNA 1	-1.046	1.747
1553541_at	LMX1A	LIM homeobox transcription factor 1 alpha	1.141	1.658
1553593_a_at	TAL2	TAL bHLH transcription factor 2	1.146	1.672
1553604_at	ABCA13	ATP binding cassette subfamily A member 13	2.071	2.4
1553613_s_at	FOXC1	forkhead box C1	-1.686	1.964
1553645_at	CCDC141	coiled-coil domain containing 141	1.259	2.081
1553710_at	FAM218A	family with sequence similarity 218 member A	1.224	2.972
1553718_at	ZNF548	zinc finger protein 548	3.108	4.971
1553734_at	AK7	adenylate kinase 7	1.227	2.355
1553765_a_at	KLHL32	kelch like family member 32	-3.778	12.485
1553797_a_at	LINC01105	long intergenic non-protein coding RNA 1105	-4.248	6.137
1553906_s_at	FGD2	FYVE, RhoGEF and PH domain containing 2	-1.525	2.441
1553954_at	ALG14	ALG14, UDP-N-acetylglucosaminyltransferase subunit	1.565	2.829
1553955_at	PPP1R21	protein phosphatase 1 regulatory subunit 21	-1.282	5.317
1553956_at	TMEM237	transmembrane protein 237	1.954	8.765
1553959_a_at	B3GALT6	beta-1,3-galactosyltransferase 6	1.393	6.369
1553971_a_at	GATS	GATS, stromal antigen 3 opposite strand	-1.433	2.888
1553974_at	C22orf39	chromosome 22 open reading frame 39	-1.59	5.568
1553976_a_at	DPCD	deleted in primary ciliary dyskinesia homolog (mouse)	1.371	2.389
1553978_at	BORCS8	BLOC-1 related complex subunit 8	1.481	2.417
1553984_s_at	DTYMK	deoxythymidylate kinase	1.79	9.497
1553997_a_at	ASPHD1	aspartate beta-hydroxylase domain containing 1	-7.247	17.494
1553998_at	DMRTC1B///DMRTC1	DMRT like family C1B///DMRT like family C1	-3.169	8.69
1554003_at	ARHGEF28	Rho guanine nucleotide exchange factor 28	1.296	2.273
1554079_at	GALNT18	polypeptide N-acetylgalactosaminyltransferase 18	-1.469	3.618
1554089_s_at	SBDSP1///SBDS	Shwachman-Bodian-Diamond syndrome pseudogene 1///SBDS ribosome assembly guanine nucleotide exchange factor	-1.043	4.099
1554105_at	TMEM185A	transmembrane protein 185A	1.04	3.471
1554106_at	NBEAL1	neurobeachin like 1	2.541	4.954
1554143_a_at	SUGT1P3	SGT1 homolog, MIS12 kinetochore complex assembly cochaperone pseudogene 3	-2.024	6.231
1554155_at	MCPH1	microcephalin 1	2.036	7.359
1554176_a_at	C3orf33	chromosome 3 open reading frame 33	1.766	5.37
1554181_at	SNX32	sorting nexin 32	-2.464	2.32
1554201_at	CABP4	calcium binding protein 4	1.286	2.753
1554228_a_at	BAALC-AS2	BAALC antisense RNA 2	-1.184	3.216
1554241_at	COCH	cochlin	1.07	3.539
1554250_s_at	STAG3L2///STAG3L3///TRIM73	stromal antigen 3-like 2 (pseudogene)///stromal antigen 3-like 3 (pseudogene)///tripartite motif containing 73	1.308	1.823
1554299_at	NPAS4	neuronal PAS domain protein 4	-4.495	4.935
1554408_a_at	TK1	thymidine kinase 1	1.894	7.85
1554465_s_at	ZNF674///KRBOX4	zinc finger protein 674///KRAB box domain containing 4	1.149	3.567
1554479_a_at	CARD8	caspase recruitment domain family member 8	2.273	4.597
1554526_at	OLFM3	olfactomedin 3	-5.023	8.233
1554542_at	SLC25A48	solute carrier family 25 member 48	-1.397	5.531
1554547_at	FAM13C	family with sequence similarity 13 member C	-2.374	7.126
1554559_at	GPR62	G protein-coupled receptor 62	-1.518	3.11
1554572_a_at	SUV39H2	suppressor of variegation 3-9 homolog 2	1.921	5.932
1554588_a_at	TTC30B	tetratricopeptide repeat domain 30B	3.147	10.384
1554609_at	LOC100287896	uncharacterized LOC100287896	-1.091	2.522
1554627_a_at	ASCC1	activating signal cointegrator 1 complex subunit 1	1.157	2.35
1554640_at	PALM2	paralemmin 2	-4.299	7.142
1554706_at	OR2L13	olfactory receptor family 2 subfamily L member 13	-2.425	4.07
1554801_at	FNDC9	fibronectin type III domain containing 9	-3.489	9.401
1554804_a_at	CLDN19	claudin 19	2.199	4.738
1555041_a_at	NAGA	alpha-N-acetylgalactosaminidase	2.299	5.456
1555216_a_at	LOC101060604///SLC7A5P2///SLC7A5P1	putative L-type amino acid transporter 1-like protein IMAA///solute carrier family 7 member 5 pseudogene 2///solute carrier family 7 member 5 pseudogene 1	2.936	2.878
1555268_a_at	GRID1	glutamate ionotropic receptor delta type subunit 1	-2.751	8.516
1555310_a_at	PAK6	p21 (RAC1) activated kinase 6	-5.622	8.748
1555385_at	B4GALNT1	beta-1,4-N-acetyl-galactosaminyltransferase 1	-3.001	5.367
1555509_a_at	SLC25A41	solute carrier family 25 member 41	-1.104	4.081
1555533_at	QRFPR	pyroglutamylated RFamide peptide receptor	2.394	3.612
1555575_a_at	KDELR1	KDEL endoplasmic reticulum protein retention receptor 1	1.763	10.747
1555758_a_at	CDKN3	cyclin dependent kinase inhibitor 3	4.566	12.188
1555783_x_at	PQLC2	PQ loop repeat containing 2	1.228	5.049
1555820_a_at	MKS1	Meckel syndrome, type 1	2.137	6.328
1555844_s_at	HNRNPM	heterogeneous nuclear ribonucleoprotein M	1.3	7.846
1555847_a_at	MIR24-2///MIR23A///LOC284454	microRNA 24-2///microRNA 23a///uncharacterized LOC284454	1.067	2.079
1555867_at	GNG4	G protein subunit gamma 4	-4.091	4.393
1555872_a_at	LOC728903///GLIDR	uncharacterized LOC728903///glioblastoma down-regulated RNA	1.049	2.908
1555874_x_at	GLIDR	glioblastoma down-regulated RNA	1.314	6.434
1555881_s_at	LZTS2	leucine zipper tumor suppressor 2	1.592	2.726
1555883_s_at	SPIN3	spindlin family member 3	-1.184	5.059
1555889_a_at	CRTAP	cartilage associated protein	2.841	4.127
1555894_s_at	MTSS1L	metastasis suppressor 1 like	-1.621	3.464
1556001_at	LOC284939///MAPK8IP2	uncharacterized LOC284939///mitogen-activated protein kinase 8 interacting protein 2	-2.646	5.49
1556033_at	LINC01138	long intergenic non-protein coding RNA 1138	-1.658	3.478
1556039_s_at	GPR173	G protein-coupled receptor 173	2.055	4.783
1556047_s_at	MAGEE1	MAGE family member E1	-1.986	9.14
1556057_s_at	NEUROD1	neuronal differentiation 1	-4.342	3.813
1556064_at	LOC284926	uncharacterized LOC284926	1.416	4.597
1556096_s_at	UNC13C	unc-13 homolog C	-8.521	20.127
1556102_x_at	LOC389906	zinc finger protein 839 pseudogene	1.269	2.746
1556129_at	LOC642533	uncharacterized LOC642533	1.645	4.308
1556145_a_at	LOC100131170	uncharacterized LOC100131170	-2.596	5.767
1556178_x_at	TAF8	TATA-box binding protein associated factor 8	1.78	6.228
1556228_a_at	VCPIP1	valosin containing protein interacting protein 1	-1.84	6.121
1556244_s_at	LOC375196	uncharacterized LOC375196	-2.003	4.021
1556255_a_at	LOC400756	uncharacterized LOC400756	1.946	5.566
1556265_at	C20orf202	chromosome 20 open reading frame 202	1.417	3.365
1556308_at	PRRT3	proline rich transmembrane protein 3	-2.93	8.023
1556351_at	HCN1	hyperpolarization activated cyclic nucleotide gated potassium channel 1	-6.199	8.926
1556366_s_at	LY86-AS1	LY86 antisense RNA 1	-3.415	6.339
1556377_s_at	LMO7	LIM domain 7	-1.263	3.813
1556414_at	LINC00515	long intergenic non-protein coding RNA 515	-1.484	4.659
1556499_s_at	COL1A1	collagen type I alpha 1 chain	3.524	3.337
1556598_at	ARPP21	cAMP regulated phosphoprotein 21	-1.147	1.871
1556599_s_at	ARPP21	cAMP regulated phosphoprotein 21	-2.924	5.177
1556627_at	DRP2	dystrophin related protein 2	-4.264	7.532
1556633_at	C1orf204	chromosome 1 open reading frame 204	-2.958	4.674
1556641_at	SLC7A14	solute carrier family 7 member 14	-6.916	18.987
1556725_a_at	LOC100288490	uncharacterized LOC100288490	1.138	2.458
1556798_a_at	RNF144A-AS1	RNF144A antisense RNA 1	-1.575	6.33
1556821_x_at	DLEU2	deleted in lymphocytic leukemia 2 (non-protein coding)	2.366	3.739
1556907_at	ZNF474	zinc finger protein 474	1.008	2.08
1556941_a_at	LOC283484	uncharacterized LOC283484	-2.992	7.787
1556988_s_at	CHD1L	chromodomain helicase DNA binding protein 1 like	1.4	4.677
1557049_at	BTBD19	BTB domain containing 19	2.065	5.799
1557073_s_at	TTBK2	tau tubulin kinase 2	-2.722	10.24
1557091_at	MAMSTR	MEF2 activating motif and SAP domain containing transcriptional regulator	1.385	3.562
1557098_s_at	HAR1A	highly accelerated region 1A (non-protein coding)	-3.387	14.08
1557107_at	SLC26A4-AS1	SLC26A4 antisense RNA 1	-3.851	6.17
1557113_at	LOC283588	uncharacterized LOC283588	-2.518	4.587
1557119_a_at	ZNF575	zinc finger protein 575	-1.249	3.716
1557122_s_at	GABRB2	gamma-aminobutyric acid type A receptor beta2 subunit	-7.473	11.711
1557123_a_at	CHADL	chondroadherin like	-1.174	3.463
1557133_at	LINC00632	long intergenic non-protein coding RNA 632	-4.049	8.752
1557143_at	CSMD2	CUB and Sushi multiple domains 2	-1.965	7.195
1557166_at	PDCD4	programmed cell death 4 (neoplastic transformation inhibitor)	-1.21	1.784
1557169_x_at	HCG11	HLA complex group 11 (non-protein coding)	-2.348	5.436
1557181_s_at	C11orf87	chromosome 11 open reading frame 87	-4.578	6.823
1557203_at	PABPC1L2B///PABPC1L2A	poly(A) binding protein cytoplasmic 1 like 2B///poly(A) binding protein cytoplasmic 1 like 2A	-2.87	6.587
1557283_a_at	ZNF519	zinc finger protein 519	-1.472	2.776
1557345_at	LOC283516	uncharacterized LOC283516	-1.286	3.547
1557359_at	LINC01268	long intergenic non-protein coding RNA 1268	1.103	1.847
1557371_a_at	LINC00961	long intergenic non-protein coding RNA 961	1.111	1.967
1557411_s_at	SLC25A43	solute carrier family 25 member 43	2.687	5.15
1557415_s_at	LETM2	leucine zipper and EF-hand containing transmembrane protein 2	1.354	2.796
1557430_at	SMIM17	small integral membrane protein 17	-2.905	4.647
1557450_s_at	WHAMMP2	WAS protein homolog associated with actin, golgi membranes and microtubules pseudogene 2	1.215	1.6
1557451_at	DGCR10	DiGeorge syndrome critical region gene 10 (non-protein coding)	-1.01	2.851
1557458_s_at	SHB	SH2 domain containing adaptor protein B	1.89	3.22
1557474_at	LOC284578	uncharacterized LOC284578	-2.762	8.597
1557475_at	LINC00507	long intergenic non-protein coding RNA 507	-4.276	6.166
1557481_a_at	LINC00320	long intergenic non-protein coding RNA 320	-2.013	5.135
1557545_s_at	RNF165	ring finger protein 165	-3.356	4.567
1557617_at	DCTN1-AS1	DCTN1 antisense RNA 1	-3.994	12.68
1557636_a_at	C7orf57	chromosome 7 open reading frame 57	2.314	3.661
1557680_at	SAMD15	sterile alpha motif domain containing 15	1.316	3.545
1557684_at	ZNF286A	zinc finger protein 286A	1.83	5.304
1557754_at	LOC401068	uncharacterized LOC401068	1.053	3.624
1557895_at	FLJ35934	FLJ35934	1.292	2.673
1557948_at	PHLDB3	pleckstrin homology like domain family B member 3	2.426	9.523
1558041_a_at	KIAA0895L	KIAA0895 like	-1.463	2.545
1558118_at	LOC100287576///DGCR5	uncharacterized LOC100287576///DiGeorge syndrome critical region gene 5 (non-protein coding)	-1.498	3.184
1558123_at	LINC00957	long intergenic non-protein coding RNA 957	-3.028	5.691
1558189_a_at	LOC284570///GPR37L1	uncharacterized LOC284570///G protein-coupled receptor 37 like 1	-4.195	6.03
1558195_at	LINC00592	long intergenic non-protein coding RNA 592	-1.492	5.975
1558290_a_at	MIR1204///PVT1	microRNA 1204///Pvt1 oncogene (non-protein coding)	3.658	10.139
1558368_s_at	DRAXIN	dorsal inhibitory axon guidance protein	2.194	3.546
1558388_a_at	UG0898H09	uncharacterized LOC643763	-2.454	2.757
1558404_at	LINC00622	long intergenic non-protein coding RNA 622	-4.097	6.273
1558411_at	EGFEM1P	EGF like and EMI domain containing 1, pseudogene	1.562	3.365
1558414_at	FRRS1L	ferric chelate reductase 1 like	-2.323	2.688
1558426_x_at	ORAI2	ORAI calcium release-activated calcium modulator 2	1.191	3.413
1558508_a_at	C1orf53	chromosome 1 open reading frame 53	1.484	1.794
1558530_at	LRTM2	leucine rich repeats and transmembrane domains 2	-2.956	9.739
1558569_at	LOC100131541	uncharacterized LOC100131541	2.42	5.534
1558620_at	ZNF621	zinc finger protein 621	1.459	4.147
1558641_at	SPATA24	spermatogenesis associated 24	2.07	5.194
1558700_s_at	ZNF260	zinc finger protein 260	2.001	6.997
1558711_at	FAM13A-AS1	FAM13A antisense RNA 1	-1.291	2.4
1558723_at	LOC284014	uncharacterized LOC284014	-1.005	2.485
1558750_a_at	LOC100288637///ARHGAP11B	OTU deubiquitinase 7A pseudogene///Rho GTPase activating protein 11B	1.201	3.116
1558795_at	LOC101928307	uncharacterized LOC101928307	-3.064	5.588
1558856_at	DMRTA2	DMRT like family A2	1.621	1.933
1558953_s_at	CEP164	centrosomal protein 164	1.194	3.576
1558971_at	THEMIS	thymocyte selection associated	-1.283	2.897
1559033_at	LINC01018	long intergenic non-protein coding RNA 1018	-1.275	4.108
1559067_a_at	LOC158402	uncharacterized LOC158402	-2.728	5.517
1559072_a_at	ELFN2	extracellular leucine rich repeat and fibronectin type III domain containing 2	-5.618	6.017
1559136_s_at	LINC00894///LINC00893	long intergenic non-protein coding RNA 894///long intergenic non-protein coding RNA 893	1.074	4.527
1559141_s_at	FAM87B///FAM87A	family with sequence similarity 87 member B///family with sequence similarity 87 member A	-1.269	3.563
1559163_at	INHBA-AS1	INHBA antisense RNA 1	-1.287	1.778
1559194_a_at	CLEC4GP1	C-type lectin domain family 4 member G pseudogene 1	-1.192	3.13
1559266_s_at	SKIDA1	SKI/DACH domain containing 1	1.461	2.885
1559280_a_at	APELA	apelin receptor early endogenous ligand	1.408	1.744
1559502_s_at	LRRC25	leucine rich repeat containing 25	1.172	1.986
1559504_at	MIR2682///MIR137///MIR137HG	microRNA 2682///microRNA 137///MIR137 host gene	1.307	2.698
1559545_at	LOC101930404///SNORD116-28///SNORD115-26///SNORD115-13///SNORD115-7///SNORD116-22///SNORD116-4///PWARSN///SNORD107///SNRPN///IPW	uncharacterized LOC101930404///small nucleolar RNA, C/D box 116-28///small nucleolar RNA, C/D box 115-26///small nucleolar RNA, C/D box 115-13///small nucleolar RNA, C/D box 115-7///small nucleolar RNA, C/D box 116-22///small nucleolar RNA, C/D box 116-4///Prader Willi/Angelman region RNA, SNRPN neighbor///small nucleolar RNA, C/D box 107///small nuclear ribonucleoprotein polypeptide N///imprinte…	-4.12	10.431
1559603_at	GPR12	G protein-coupled receptor 12	-1.139	3.509
1559650_at	JAZF1-AS1	JAZF1 antisense RNA 1	-1.197	6.502
1559681_a_at	LOC101930303///LOC101930301///TRIM16L	uncharacterized LOC101930303///uncharacterized LOC101930301///tripartite motif containing 16-like	1.89	4.887
1559760_at	LOC401220	uncharacterized LOC401220	-2.623	2.483
1559827_at	LINC00960	long intergenic non-protein coding RNA 960	1.355	2.527
1559964_at	LOC401261	uncharacterized LOC401261	1.633	2.912
1559966_a_at	ZFHX4-AS1	ZFHX4 antisense RNA 1	2.176	2.564
1560250_s_at	LOC284242	uncharacterized LOC284242	-1.395	2.949
1560562_a_at	ZNF677	zinc finger protein 677	2.047	6.211
1560676_at	SIAH3	siah E3 ubiquitin protein ligase family member 3	-1.758	4.316
1560692_at	VSTM2A-OT1///VSTM2A	VSTM2A overlapping transcript 1///V-set and transmembrane domain containing 2A	-3.714	6.679
1560698_a_at	TRHDE-AS1	TRHDE antisense RNA 1	-3.589	6.951
1561101_at	JAKMIP2-AS1	JAKMIP2 antisense RNA 1	2.419	3.43
1561171_a_at	GOLGA6L6///GOLGA6L22///GOLGA6L1	golgin A6 family-like 6///golgin A6 family-like 22///golgin A6 family-like 1	1.48	1.7
1561319_at	OTX2-AS1	OTX2 antisense RNA 1 (head to head)	4.929	6.157
1561394_s_at	KIAA1755	KIAA1755	-1.281	2.316
1561403_at	SOHLH1	spermatogenesis and oogenesis specific basic helix-loop-helix 1	-1.798	6.121
1562386_s_at	ZNF501	zinc finger protein 501	1.298	2.883
1562403_a_at	SLC8A3	solute carrier family 8 member A3	-4.725	8.563
1562736_at	LHX9	LIM homeobox 9	2.503	1.88
1563022_at	CCDC160	coiled-coil domain containing 160	1.526	1.795
1563182_at	ACVR1C	activin A receptor type 1C	-2.03	2.779
1563367_at	MAPT-AS1	MAPT antisense RNA 1	-1.857	3.712
1563445_x_at	CTSLP8	cathepsin L pseudogene 8	1.019	1.755
1563638_at	TVP23A	trans-golgi network vesicle protein 23 homolog A	-1.583	2.737
1563646_a_at	TMEM67	transmembrane protein 67	4.971	17.752
1563658_a_at	SYT9	synaptotagmin 9	-1.884	2.062
1564031_a_at	RELL2	RELT like 2	-4.445	13.206
1564040_a_at	TMEM235	transmembrane protein 235	-3.02	3.521
1564139_at	A2M-AS1	A2M antisense RNA 1 (head to head)	1.49	1.927
1564207_at	LINC00957	long intergenic non-protein coding RNA 957	-2.682	8.112
1564277_a_at	LOC101929583///LOC101928195///LOC100996643///LOC100133920///LOC286297	methylenetetrahydrofolate dehydrogenase (NADP+ dependent) 1-like pseudogene///methylenetetrahydrofolate dehydrogenase (NADP+ dependent) 1-like pseudogene///monofunctional C1-tetrahydrofolate synthase, mitochondrial-like///methylenetetrahydrofolate dehydrogenase (NADP+ dependent) 1-like pseudogene///methylenetetrahydrofolate dehydrogenase (NADP+ dependent) 1-like pseudogene	1.258	2.306
1564475_s_at	ZBED3-AS1	ZBED3 antisense RNA 1	2.701	8.847
1564559_at	LOC728073	uncharacterized LOC728073	-1.221	4.283
1565786_x_at	FLJ45482	uncharacterized LOC645566	1.138	1.885
1566152_a_at			2.793	7.173
1566219_at	KRTAP5-AS1	KRTAP5-1/KRTAP5-2 antisense RNA 1	-2.322	5.474
1566968_at	SPRY4-IT1	SPRY4 intronic transcript 1	1.711	2.858
1568249_at	SNHG17///SNORA71B	small nucleolar RNA host gene 17///small nucleolar RNA, H/ACA box 71B	3.122	2.123
1568597_at	LOC646762	uncharacterized LOC646762	-2.108	9.056
1568604_a_at	CADPS	calcium dependent secretion activator	-5.996	11.317
1568606_at	C11orf88	chromosome 11 open reading frame 88	1.452	2.87
1568609_s_at	LOC103091866///LINC00623///LINC01138///LINC00869	uncharacterized LOC103091866///long intergenic non-protein coding RNA 623///long intergenic non-protein coding RNA 1138///long intergenic non-protein coding RNA 869	-1.391	2.328
1568612_at	GABRG2	gamma-aminobutyric acid type A receptor gamma2 subunit	-9.396	26.171
1568625_at	SVOP	SV2 related protein	-3.275	4.665
1568658_at	C2orf74///KIAA1841	chromosome 2 open reading frame 74///KIAA1841	-1.66	5.23
1568763_s_at	LOC102724884///LOC728613///PDCD6	uncharacterized LOC102724884///programmed cell death 6 pseudogene///programmed cell death 6	2.149	5.166
1568768_s_at	BRE-AS1	BRE antisense RNA 1	-1.729	3.374
1568868_at	CYP27C1	cytochrome P450 family 27 subfamily C member 1	1.47	2.359
1568870_at	SLC24A4	solute carrier family 24 member 4	-2.642	2.797
1568933_at	LYPD8	LY6/PLAUR domain containing 8	-1.801	5.484
1569003_at	VMP1	vacuole membrane protein 1	2.839	5.703
1569107_s_at	ZFP69	ZFP69 zinc finger protein	1.805	5.714
1569110_x_at	LOC728613	programmed cell death 6 pseudogene	5.509	6.662
1569139_s_at	FAM53A	family with sequence similarity 53 member A	1.572	5.064
1569256_a_at	FAM43B	family with sequence similarity 43 member B	-1.403	2.538
1569369_at	ZFYVE28	zinc finger FYVE-type containing 28	-2.719	6.343
1569453_a_at	LOC692247	uncharacterized LOC692247	1.75	1.931
1569713_at	SEC24B-AS1	SEC24B antisense RNA 1	1.401	5.617
1569872_a_at	LMF1	lipase maturation factor 1	-2.461	3.254
1570253_a_at	RHEBL1	Ras homolog enriched in brain like 1	-2.15	2.292
1570255_s_at	ANKRD20A12P///ANKRD20A8P///ANKRD20A4///ANKRD20A2///ANKRD20A3///ANKRD20A5P///ANKRD20A1	ankyrin repeat domain 20 family member A12, pseudogene///ankyrin repeat domain 20 family member A8, pseudogene///ankyrin repeat domain 20 family member A4///ankyrin repeat domain 20 family member A2///ankyrin repeat domain 20 family member A3///ankyrin repeat domain 20 family member A5, pseudogene///ankyrin repeat domain 20 family member A1	2.213	3.632
1570266_x_at	ERVH-1	endogenous retrovirus group H member 1	1.202	2.131
200010_at	RPL11	ribosomal protein L11	1.012	8.681
200011_s_at	ARF3	ADP ribosylation factor 3	-1.386	6.524
200020_at	TARDBP	TAR DNA binding protein	1.045	10.769
200023_s_at	EIF3F	eukaryotic translation initiation factor 3 subunit F	1.394	11.235
200024_at	RPS5	ribosomal protein S5	1.191	5.536
200035_at	CTDNEP1	CTD nuclear envelope phosphatase 1	1.058	6.064
200037_s_at	CBX3	chromobox 3	1.209	8.558
200040_at	KHDRBS1	KH RNA binding domain containing, signal transduction associated 1	1.368	8.246
200041_s_at	ATP6V1G2-DDX39B///SNORD84///DDX39B	ATP6V1G2-DDX39B readthrough (NMD candidate)///small nucleolar RNA, C/D box 84///DEAD-box helicase 39B	1.907	7.607
200044_at	GATC///SRSF9	glutamyl-tRNA amidotransferase subunit C///serine and arginine rich splicing factor 9	1.587	13.513
200050_at	ZNF146	zinc finger protein 146	1.49	6.748
200052_s_at	ILF2	interleukin enhancer binding factor 2	1.835	9.143
200054_at	ZPR1	ZPR1 zinc finger	1.2	5.12
200057_s_at	NONO	non-POU domain containing, octamer-binding	1.134	9.197
200058_s_at	LOC101929240///SNRNP200	U5 small nuclear ribonucleoprotein 200 kDa helicase pseudogene///small nuclear ribonucleoprotein U5 subunit 200	1.287	8.494
200071_at	SMNDC1	survival motor neuron domain containing 1	1.024	3.555
200073_s_at	HNRNPD	heterogeneous nuclear ribonucleoprotein D	1.3	9.037
200075_s_at	GUK1	guanylate kinase 1	-1.02	4.892
200078_s_at	ATP6V0B	ATPase H+ transporting V0 subunit b	-1.044	7.065
200082_s_at	RPS7	ribosomal protein S7	1.02	6.824
200088_x_at	NBEAL1///RPL12	neurobeachin like 1///ribosomal protein L12	1.072	8.551
200595_s_at	EIF3A	eukaryotic translation initiation factor 3 subunit A	1.28	7.81
200599_s_at	MIR3652///HSP90B1	microRNA 3652///heat shock protein 90 beta family member 1	1.001	9.485
200606_at	DSP	desmoplakin	2.961	3.292
200617_at	MLEC	malectin	1.114	4.146
200621_at	CSRP1	cysteine and glycine rich protein 1	-5.116	11.733
200632_s_at	NDRG1	N-myc downstream regulated 1	-3.281	6.856
200634_at	PFN1	profilin 1	2.166	9.177
200649_at	NUCB1	nucleobindin 1	1.634	4.17
200651_at	SNORD96A///SNORD95///RACK1	small nucleolar RNA, C/D box 96A///small nucleolar RNA, C/D box 95///receptor for activated C kinase 1	1.774	15.795
200652_at	SSR2	signal sequence receptor subunit 2	1.526	10.357
200656_s_at	P4HB	prolyl 4-hydroxylase subunit beta	2.416	7.665
200658_s_at	PHB	prohibitin	1.413	5.304
200660_at	S100A11	S100 calcium binding protein A11	2.011	1.756
200663_at	CD63	CD63 molecule	1.458	7.593
200665_s_at	SPARC	secreted protein acidic and cysteine rich	1.493	4.935
200670_at	XBP1	X-box binding protein 1	1.155	2.979
200678_x_at	GRN	granulin	1.916	4.695
200686_s_at	SRSF11	serine and arginine rich splicing factor 11	1.011	3.401
200687_s_at	SF3B3	splicing factor 3b subunit 3	1.526	10.826
200694_s_at	DDX24	DEAD-box helicase 24	-1.032	9.588
200698_at	KDELR2	KDEL endoplasmic reticulum protein retention receptor 2	2	9.22
200701_at	NPC2	NPC intracellular cholesterol transporter 2	1.484	3.364
200704_at	LITAF	lipopolysaccharide induced TNF factor	1.693	3.385
200705_s_at	SNORA41///EEF1B2	small nucleolar RNA, H/ACA box 41///eukaryotic translation elongation factor 1 beta 2	1.064	8.085
200713_s_at	MAPRE1	microtubule associated protein RP/EB family member 1	1.306	7.519
200715_x_at	SNORD32A///SNORD33///SNORD34///SNORD35A///RPL13A	small nucleolar RNA, C/D box 32A///small nucleolar RNA, C/D box 33///small nucleolar RNA, C/D box 34///small nucleolar RNA, C/D box 35A///ribosomal protein L13a	1.713	11.081
200723_s_at	CAPRIN1	cell cycle associated protein 1	1.504	6.88
200733_s_at	PTP4A1	protein tyrosine phosphatase type IVA, member 1	1.25	4.144
200748_s_at	FTH1	ferritin heavy chain 1	-1.09	5.189
200750_s_at	RAN	RAN, member RAS oncogene family	1.452	7.334
200751_s_at	HNRNPC	heterogeneous nuclear ribonucleoprotein C (C1/C2)	1.523	8.492
200752_s_at	CAPN1	calpain 1	1.254	3.66
200757_s_at	CALU	calumenin	1.204	3.743
200762_at	DPYSL2	dihydropyrimidinase like 2	-1.846	6.84
200771_at	LAMC1	laminin subunit gamma 1	2.199	3.912
200781_s_at	RPS15A	ribosomal protein S15a	1.183	11.918
200782_at	ANXA5	annexin A5	1.522	4.087
200788_s_at	PEA15	phosphoprotein enriched in astrocytes 15	-1.697	9.166
200790_at	ODC1	ornithine decarboxylase 1	1.989	9.839
200791_s_at	IQGAP1	IQ motif containing GTPase activating protein 1	1.622	2.852
200793_s_at	ACO2	aconitase 2	-1.514	4.333
200795_at	SPARCL1	SPARC like 1	-2.556	8.041
200805_at	LMAN2	lectin, mannose binding 2	1.168	2.819
200808_s_at	ZYX	zyxin	2.707	6.014
200809_x_at	RPL12	ribosomal protein L12	1.208	8.848
200816_s_at	PAFAH1B1	platelet activating factor acetylhydrolase 1b regulatory subunit 1	-1.114	8.528
200824_at	GSTP1	glutathione S-transferase pi 1	2.265	6.733
200827_at	PLOD1	procollagen-lysine,2-oxoglutarate 5-dioxygenase 1	1.368	2.146
200828_s_at	ZNF207	zinc finger protein 207	1.307	6.148
200831_s_at	SCD	stearoyl-CoA desaturase	2.477	3.227
200833_s_at	RAP1B	RAP1B, member of RAS oncogene family	1.074	4.789
200850_s_at	AHCYL1	adenosylhomocysteinase like 1	-1.459	6.24
200858_s_at	SNORD38B///SNORD55///RPS8	small nucleolar RNA, C/D box 38B///small nucleolar RNA, C/D box 55///ribosomal protein S8	1.292	10.925
200860_s_at	CNOT1	CCR4-NOT transcription complex subunit 1	1.581	9.834
200862_at	DHCR24	24-dehydrocholesterol reductase	-1.135	1.811
200869_at	SNORA68///RPL18A	small nucleolar RNA, H/ACA box 68///ribosomal protein L18a	1.79	6.951
200878_at	EPAS1	endothelial PAS domain protein 1	-1.859	6.802
200884_at	CKB	creatine kinase B	-2.284	3.639
200885_at	RHOC	ras homolog family member C	1.45	2.013
200887_s_at	STAT1	signal transducer and activator of transcription 1	1.062	4.061
200888_s_at	SNORA21///RPL23	small nucleolar RNA, H/ACA box 21///ribosomal protein L23	1.396	10.562
200891_s_at	SSR1	signal sequence receptor subunit 1	1.502	9.023
200896_x_at	HDGF	hepatoma-derived growth factor	1.901	10.971
200897_s_at	PALLD	palladin, cytoskeletal associated protein	1.685	3.6
200902_at	2023-09-15	15 kDa selenoprotein	1.126	5.195
200903_s_at	AHCY	adenosylhomocysteinase	1.795	10.241
200910_at	LOC101927137///CCT3	uncharacterized LOC101927137///chaperonin containing TCP1 subunit 3	1.058	9.499
200911_s_at	TACC1	transforming acidic coiled-coil containing protein 1	-1.922	7.382
200913_at	PPM1G	protein phosphatase, Mg2+/Mn2+ dependent 1G	1.306	6.998
200918_s_at	SRPRA	SRP receptor alpha subunit	1.16	5.013
200924_s_at	SLC3A2	solute carrier family 3 member 2	1.221	4.683
200931_s_at	VCL	vinculin	2.619	6.767
200934_at	DEK	DEK proto-oncogene	1.523	7.192
200936_at	RPL8	ribosomal protein L8	1.155	7.889
200942_s_at	HSBP1	heat shock factor binding protein 1	1.057	4.496
200943_at	HMGN1	high mobility group nucleosome binding domain 1	1.736	12.154
200947_s_at	GLUD1	glutamate dehydrogenase 1	-2.148	7.097
200957_s_at	SSRP1	structure specific recognition protein 1	1.414	8.169
200959_at	FUS	FUS RNA binding protein	1.454	5.921
200964_at	UBA1	ubiquitin like modifier activating enzyme 1	1.525	7.69
200967_at	PPIB	peptidylprolyl isomerase B	1.32	7.531
200974_at	ACTA2	actin, alpha 2, smooth muscle, aorta	3.198	5.297
200978_at	MDH1	malate dehydrogenase 1	-1.537	9.022
200986_at	SERPING1	serpin family G member 1	2.244	4.079
200990_at	TRIM28	tripartite motif containing 28	1.898	6.593
200993_at	IPO7	importin 7	1.211	5.004
200997_at	RBM14-RBM4///RBM4	RBM14-RBM4 readthrough///RNA binding motif protein 4	1.014	4.963
200999_s_at	CKAP4	cytoskeleton associated protein 4	1.686	7.237
201004_at	SSR4	signal sequence receptor subunit 4	1.089	6.589
201011_at	RPN1	ribophorin I	1.34	4.196
201012_at	ANXA1	annexin A1	2.027	1.627
201013_s_at	PAICS	phosphoribosylaminoimidazole carboxylase; phosphoribosylaminoimidazolesuccinocarboxamide synthase	1.637	7.91
201015_s_at	JUP	junction plakoglobin	1.745	3.269
201020_at	YWHAH	tyrosine 3-monooxygenase/tryptophan 5-monooxygenase activation protein eta	-2.996	9.721
201029_s_at	CD99	CD99 molecule	1.117	2.603
201032_at	BLCAP	bladder cancer associated protein	-1.274	4.126
201037_at	PFKP	phosphofructokinase, platelet	-1.204	4.466
201041_s_at	DUSP1	dual specificity phosphatase 1	-1.084	2.126
201047_x_at	WTH3DI///RAB6A	RAB6C-like///RAB6A, member RAS oncogene family	-1.02	6.856
201058_s_at	MYL9	myosin light chain 9	3.068	1.741
201063_at	RCN1	reticulocalbin 1	1.863	8.193
201069_at	MMP2	matrix metallopeptidase 2	2.108	3.491
201074_at	SMARCC1	SWI/SNF related, matrix associated, actin dependent regulator of chromatin subfamily c member 1	2.18	13.4
201087_at	PXN	paxillin	1.435	3.99
201088_at	KPNA2	karyopherin subunit alpha 2	1.392	2.955
201089_at	ATP6V1B2	ATPase H+ transporting V1 subunit B2	-1.475	4.169
201095_at	DAP	death associated protein	1.815	6.317
201098_at	COPB2	coatomer protein complex subunit beta 2	1.26	6.46
201102_s_at	PFKL	phosphofructokinase, liver type	1.156	4.504
201104_x_at	NBPF25P///NBPF26///NBPF19///NBPF20///NBPF10///NBPF8///NBPF9///NBPF15///NBPF11///NBPF14	neuroblastoma breakpoint family member 25, pseudogene///neuroblastoma breakpoint family member 26///neuroblastoma breakpoint family member 19///neuroblastoma breakpoint family member 20///neuroblastoma breakpoint family member 10///neuroblastoma breakpoint family member 8///neuroblastoma breakpoint family member 9///neuroblastoma breakpoint family member 15///neuroblastoma breakpoint family membe…	2.03	7.565
201117_s_at	CPE	carboxypeptidase E	-2.07	3.488
201118_at	PGD	phosphogluconate dehydrogenase	2.044	5.216
201131_s_at	CDH1	cadherin 1	3.637	5.158
201133_s_at	PJA2	praja ring finger ubiquitin ligase 2	-1.025	2.742
201136_at	PLP2	proteolipid protein 2	2.901	2.291
201139_s_at	SSB	Sjogren syndrome antigen B	1.352	8.743
201141_at	GPNMB	glycoprotein nmb	2.157	1.588
201153_s_at	MBNL1	muscleblind like splicing regulator 1	-1.069	4.679
201160_s_at	YBX3	Y-box binding protein 3	1.331	4.435
201162_at	IGFBP7	insulin like growth factor binding protein 7	1.291	2.131
201168_x_at	ARHGDIA	Rho GDP dissociation inhibitor alpha	1.24	3.217
201180_s_at	GNAI3	G protein subunit alpha i3	1.508	8.997
201185_at	HTRA1	HtrA serine peptidase 1	-1.811	5.235
201186_at	LRPAP1	LDL receptor related protein associated protein 1	-1.023	3.137
201189_s_at	ITPR3	inositol 1,4,5-trisphosphate receptor type 3	-1.416	3.146
201190_s_at	PITPNA	phosphatidylinositol transfer protein alpha	-1.209	9.311
201193_at	IDH1	isocitrate dehydrogenase (NADP(+)) 1, cytosolic	1.84	9.775
201202_at	PCNA	proliferating cell nuclear antigen	1.757	9.27
201209_at	HDAC1	histone deacetylase 1	2.196	8.852
201216_at	ERP29	endoplasmic reticulum protein 29	1.308	6.498
201220_x_at	CTBP2	C-terminal binding protein 2	1.134	4.228
201234_at	ILK	integrin linked kinase	1.04	4.605
201236_s_at	BTG2	BTG anti-proliferation factor 2	1.191	2.378
201242_s_at	ATP1B1	ATPase Na+/K+ transporting subunit beta 1	-2.859	6.543
201251_at	PKM	pyruvate kinase, muscle	1.539	4.197
201252_at	PSMC4	proteasome 26S subunit, ATPase 4	1.156	7.587
201263_at	TARS	threonyl-tRNA synthetase	1.085	6.852
201270_x_at	NUDCD3	NudC domain containing 3	-1.869	10.322
201275_at	FDPS	farnesyl diphosphate synthase	1.202	5.031
201277_s_at	HNRNPAB	heterogeneous nuclear ribonucleoprotein A/B	1.209	9.701
201278_at	LOC101926921///DAB2	uncharacterized LOC101926921///DAB2, clathrin adaptor protein	1.74	2.319
201287_s_at	SDC1	syndecan 1	2.91	6.261
201289_at	CYR61	cysteine rich angiogenic inducer 61	2.077	2.892
201290_at	SEC11A	SEC11 homolog A, signal peptidase complex subunit	1.733	8.592
201292_at	TOP2A	topoisomerase (DNA) II alpha	8.314	27.376
201296_s_at	WSB1	WD repeat and SOCS box containing 1	1.069	3.521
201302_at	ANXA4	annexin A4	1.726	2.323
201303_at	EIF4A3	eukaryotic translation initiation factor 4A3	1.06	4.564
201306_s_at	ANP32B	acidic nuclear phosphoprotein 32 family member B	1.53	6.653
201313_at	ENO2	enolase 2	-1.356	6.545
201318_s_at	MYL12B///MYL12A	myosin light chain 12B///myosin light chain 12A	1.264	4.374
201319_at	MYL12A	myosin light chain 12A	1.969	6.532
201327_s_at	CCT6A	chaperonin containing TCP1 subunit 6A	1.601	11.78
201328_at	ETS2	ETS proto-oncogene 2, transcription factor	-3.208	7.846
201342_at	SNRPC	small nuclear ribonucleoprotein polypeptide C	1.544	6.301
201349_at	SLC9A3R1	SLC9A3 regulator 1	-1.701	3.33
201360_at	CST3	cystatin C	-1.521	4.81
201368_at	ZFP36L2	ZFP36 ring finger protein like 2	1.786	5.75
201376_s_at	HNRNPF	heterogeneous nuclear ribonucleoprotein F	1.862	6.231
201377_at	UBAP2L	ubiquitin associated protein 2 like	1.304	7.699
201385_at	DHX15	DEAH-box helicase 15	1.118	6.963
201387_s_at	UCHL1	ubiquitin C-terminal hydrolase L1	-1.952	4.463
201389_at	ITGA5	integrin subunit alpha 5	1.348	1.818
201398_s_at	TRAM1	translocation associated membrane protein 1	1.483	6.346
201410_at	PLEKHB2	pleckstrin homology domain containing B2	-1.663	11.333
201412_at	LRP10	LDL receptor related protein 10	1.519	2.736
201417_at	SOX4	SRY-box 4	2.546	4.806
201421_s_at	WDR77	WD repeat domain 77	1.114	5.691
201422_at	IFI30///PIK3R2	IFI30, lysosomal thiol reductase///phosphoinositide-3-kinase regulatory subunit 2	2.778	4.289
201424_s_at	CUL4A	cullin 4A	1.105	5.535
201425_at	ALDH2	aldehyde dehydrogenase 2 family (mitochondrial)	-1.994	10.158
201426_s_at	VIM	vimentin	3.178	12.223
201427_s_at	SEPP1	selenoprotein P, plasma, 1	-2.131	4.124
201437_s_at	EIF4E	eukaryotic translation initiation factor 4E	1.453	3.506
201445_at	CNN3	calponin 3	1.359	4.177
201448_at	TIA1	TIA1 cytotoxic granule-associated RNA binding protein	1.099	2.274
201462_at	SCRN1	secernin 1	-1.248	2.574
201471_s_at	SQSTM1	sequestosome 1	-1.009	3.343
201477_s_at	RRM1	ribonucleotide reductase catalytic subunit M1	1.833	8.917
201479_at	MIR664B///SNORA56///DKC1	microRNA 664b///small nucleolar RNA, H/ACA box 56///dyskerin pseudouridine synthase 1	1.517	12.965
201487_at	CTSC	cathepsin C	1.756	3.003
201494_at	PRCP	prolylcarboxypeptidase	1.211	2.22
201505_at	LAMB1	laminin subunit beta 1	1.656	1.701
201506_at	TGFBI	transforming growth factor beta induced	1.945	2.714
201508_at	IGFBP4	insulin like growth factor binding protein 4	2.282	3.138
201516_at	SRM	spermidine synthase	1.327	5.386
201522_x_at	SNURF///SNRPN	SNRPN upstream reading frame///small nuclear ribonucleoprotein polypeptide N	-1.276	8.495
201525_at	APOD	apolipoprotein D	-3.488	5.886
201528_at	RPA1	replication protein A1	1.504	6.886
201535_at	UBL3	ubiquitin like 3	-1.845	11.759
201536_at	DUSP3	dual specificity phosphatase 3	-1.395	6.119
201555_at	MCM3	minichromosome maintenance complex component 3	2.632	9.519
201556_s_at	VAMP2	vesicle associated membrane protein 2	-1.549	3.295
201563_at	SORD	sorbitol dehydrogenase	1.493	6.161
201572_x_at	DCTD	dCMP deaminase	1.224	5.477
201576_s_at	TMPPE///GLB1	transmembrane protein with metallophosphoesterase domain///galactosidase beta 1	2.204	6.094
201579_at	FAT1	FAT atypical cadherin 1	1.94	5.927
201584_s_at	DDX39A	DEAD-box helicase 39A	1.963	8.669
201586_s_at	SFPQ	splicing factor proline and glutamine rich	1.443	6.834
201589_at	SMC1A	structural maintenance of chromosomes 1A	2.024	8.02
201591_s_at	NISCH	nischarin	-1.086	5.191
201594_s_at	PPP4R1	protein phosphatase 4 regulatory subunit 1	1.934	15.031
201596_x_at	KRT18	keratin 18	4.979	4.108
201598_s_at	INPPL1	inositol polyphosphate phosphatase like 1	1.67	7.451
201599_at	OAT	ornithine aminotransferase	-1.215	7.213
201600_at	PHB2	prohibitin 2	1.265	10.299
201605_x_at	CNN2	calponin 2	2.411	5.115
201606_s_at	PWP1	PWP1 homolog, endonuclein	1.266	6.876
201609_x_at	ICMT	isoprenylcysteine carboxyl methyltransferase	1.246	3.363
201612_at	ALDH9A1	aldehyde dehydrogenase 9 family member A1	1.029	3.618
201613_s_at	AP1G2	adaptor related protein complex 1 gamma 2 subunit	-1.212	2.08
201614_s_at	RUVBL1	RuvB like AAA ATPase 1	2.76	11.974
201621_at	NBL1	neuroblastoma 1, DAN family BMP antagonist	-2.624	7.408
201631_s_at	IER3	immediate early response 3	3.658	2.625
201634_s_at	CYB5B	cytochrome b5 type B	1.637	5.397
201637_s_at	FXR1	FMR1 autosomal homolog 1	1.145	4.9
201639_s_at	MIR6849///MIR1234///MIR939///CPSF1	microRNA 6849///microRNA 1234///microRNA 939///cleavage and polyadenylation specific factor 1	1.287	4.277
201653_at	CNIH1	cornichon family AMPA receptor auxiliary protein 1	1.014	4.902
201655_s_at	HSPG2	heparan sulfate proteoglycan 2	5.237	10.424
201656_at	ITGA6	integrin subunit alpha 6	1.161	1.916
201661_s_at	ACSL3	acyl-CoA synthetase long-chain family member 3	-1.57	7.009
201664_at	SMC4	structural maintenance of chromosomes 4	2.991	8.616
201673_s_at	GYS1	glycogen synthase 1	1.664	3.555
201675_at	AKAP1	A-kinase anchoring protein 1	-1.319	3.732
201690_s_at	TPD52	tumor protein D52	-1.572	8.455
201703_s_at	PPP1R10	protein phosphatase 1 regulatory subunit 10	1.745	8.399
201704_at	ENTPD6	ectonucleoside triphosphate diphosphohydrolase 6 (putative)	-1.523	7.363
201710_at	MYBL2	MYB proto-oncogene like 2	2.262	10.186
201715_s_at	ACIN1	apoptotic chromatin condensation inducer 1	1.249	5.563
201719_s_at	EPB41L2	erythrocyte membrane protein band 4.1 like 2	-1.462	2.884
201722_s_at	GALNT1	polypeptide N-acetylgalactosaminyltransferase 1	1.789	6.752
201726_at	ELAVL1	ELAV like RNA binding protein 1	2.906	14.15
201731_s_at	TPR	translocated promoter region, nuclear basket protein	1.286	8.79
201739_at	SGK1	serum/glucocorticoid regulated kinase 1	-1.119	2.011
201744_s_at	LUM	lumican	1.518	1.736
201745_at	TWF1	twinfilin actin binding protein 1	1.031	2.567
201746_at	TP53	tumor protein p53	4.602	11.503
201751_at	JOSD1	Josephin domain containing 1	-1.549	6.376
201760_s_at	WSB2	WD repeat and SOCS box containing 2	-1.298	5.852
201761_at	MTHFD2	methylenetetrahydrofolate dehydrogenase (NADP+ dependent) 2, methenyltetrahydrofolate cyclohydrolase	1.881	4.755
201762_s_at	MIR7703///PSME2	microRNA 7703///proteasome activator subunit 2	1.82	10.26
201763_s_at	DAXX	death domain associated protein	1.448	4.346
201764_at	TMEM106C	transmembrane protein 106C	2.083	7.509
201765_s_at	HEXA	hexosaminidase subunit alpha	1.103	3.378
201770_at	SNRPA	small nuclear ribonucleoprotein polypeptide A	2.118	9.668
201773_at	ADNP	activity dependent neuroprotector homeobox	1.218	4.561
201774_s_at	NCAPD2	non-SMC condensin I complex subunit D2	2.428	8.683
201783_s_at	RELA	RELA proto-oncogene, NF-kB subunit	1.293	5.104
201795_at	LBR	lamin B receptor	2.052	6.343
201797_s_at	VARS	valyl-tRNA synthetase	2.226	8.396
201798_s_at	MYOF	myoferlin	3.396	2.121
201801_s_at	SLC29A1	solute carrier family 29 member 1 (Augustine blood group)	2.337	2.811
201806_s_at	ATXN2L	ataxin 2 like	1.729	3.751
201811_x_at	SH3BP5	SH3 domain binding protein 5	-1.993	5.843
201818_at	LPCAT1	lysophosphatidylcholine acyltransferase 1	1.462	4.569
201833_at	HDAC2	histone deacetylase 2	1.405	6.72
201851_at	SH3GL1	SH3 domain containing GRB2 like 1, endophilin A2	1.08	3.712
201865_x_at	NR3C1	nuclear receptor subfamily 3 group C member 1	-1.699	4.716
201872_s_at	ABCE1	ATP binding cassette subfamily E member 1	1.442	7.391
201874_at	MPZL1	myelin protein zero like 1	2.518	6.282
201890_at	RRM2	ribonucleotide reductase regulatory subunit M2	7.016	20.38
201892_s_at	IMPDH2	inosine monophosphate dehydrogenase 2	1.653	6.389
201895_at	ARAF	A-Raf proto-oncogene, serine/threonine kinase	1.167	3.254
201897_s_at	CKS1B	CDC28 protein kinase regulatory subunit 1B	2.708	8.247
201900_s_at	AKR1A1	aldo-keto reductase family 1 member A1	1.011	5.724
201908_at	DVL3	dishevelled segment polarity protein 3	1.213	6.534
201911_s_at	FARP1	FERM, ARH/RhoGEF and pleckstrin domain protein 1	1.207	1.7
201923_at	PRDX4	peroxiredoxin 4	2.467	9.276
201928_at	PKP4	plakophilin 4	-1.872	9.469
201930_at	MCM6	minichromosome maintenance complex component 6	1.952	7.176
201944_at	HEXB	hexosaminidase subunit beta	1.313	2.728
201947_s_at	CCT2	chaperonin containing TCP1 subunit 2	1.036	9.764
201948_at	GNL2	G protein nucleolar 2	1.472	7.526
201957_at	PPP1R12B	protein phosphatase 1 regulatory subunit 12B	-2.133	6.154
201960_s_at	MYCBP2	MYC binding protein 2, E3 ubiquitin protein ligase	-2.289	10.555
201962_s_at	RNF41	ring finger protein 41	-2.668	12.908
201970_s_at	NASP	nuclear autoantigenic sperm protein	1.518	6.032
201972_at	ATP6V1A	ATPase H+ transporting V1 subunit A	-1.269	10.436
201980_s_at	RSU1	Ras suppressor protein 1	2.011	4.735
201985_at	KIAA0196	KIAA0196	1.086	5.1
201995_at	EXT1	exostosin glycosyltransferase 1	1.045	3.692
201999_s_at	DYNLT1	dynein light chain Tctex-type 1	2.43	13.839
202007_at	NID1	nidogen 1	2.628	4.161
202012_s_at	EXT2	exostosin glycosyltransferase 2	1.108	4.391
202016_at	MEST	mesoderm specific transcript	3.883	9.51
202017_at	EPHX1	epoxide hydrolase 1	2.133	2.089
202020_s_at	LANCL1	LanC like 1	-2.022	11.66
202022_at	ALDOC	aldolase, fructose-bisphosphate C	-6.501	14.714
202027_at	TMEM184B	transmembrane protein 184B	-1.639	7.067
202030_at	BCKDK	branched chain ketoacid dehydrogenase kinase	1.302	3.554
202040_s_at	KDM5A	lysine demethylase 5A	1.588	3.867
202047_s_at	CBX6	chromobox 6	-1.484	5.454
202052_s_at	RAI14	retinoic acid induced 14	2.597	3.234
202068_s_at	LDLR	low density lipoprotein receptor	1.622	2.925
202069_s_at	IDH3A	isocitrate dehydrogenase 3 (NAD(+)) alpha	-1.354	2.904
202071_at	SDC4	syndecan 4	-3.809	6.717
202073_at	OPTN	optineurin	-1.29	4.786
202075_s_at	PLTP	phospholipid transfer protein	2.17	5.155
202088_at	SLC39A6	solute carrier family 39 member 6	1.236	9.226
202092_s_at	ARL2BP	ADP ribosylation factor like GTPase 2 binding protein	1.227	5.468
202095_s_at	BIRC5	baculoviral IAP repeat containing 5	6.344	24.93
202096_s_at	TSPO	translocator protein	2.439	6.984
202107_s_at	MCM2	minichromosome maintenance complex component 2	6.296	12.404
202111_at	SLC4A2	solute carrier family 4 member 2	3.725	7.192
202113_s_at	SNX2	sorting nexin 2	1.074	1.992
202122_s_at	PLIN3	perilipin 3	2.426	5.808
202123_s_at	ABL1	ABL proto-oncogene 1, non-receptor tyrosine kinase	1.755	6.551
202125_s_at	TRAK2	trafficking kinesin protein 2	-1.22	3.379
202133_at	WWTR1	WW domain containing transcription regulator 1	2.442	5.912
202138_x_at	AIMP2	aminoacyl tRNA synthetase complex interacting multifunctional protein 2	1.432	6.417
202148_s_at	PYCR1	pyrroline-5-carboxylate reductase 1	2.019	6.554
202153_s_at	NUP62	nucleoporin 62	1.292	5.815
202157_s_at	CELF2	CUGBP, Elav-like family member 2	-1.682	4.78
202161_at	PKN1	protein kinase N1	1.718	4.246
202171_at	VEZF1	vascular endothelial zinc finger 1	2.138	9.472
202178_at	PRKCZ	protein kinase C zeta	-3.862	11.929
202179_at	BLMH	bleomycin hydrolase	1.405	4.672
202183_s_at	KIF22	kinesin family member 22	1.591	5.218
202185_at	PLOD3	procollagen-lysine,2-oxoglutarate 5-dioxygenase 3	1.648	2.588
202187_s_at	PPP2R5A	protein phosphatase 2 regulatory subunit B'alpha	-1.648	4.683
202188_at	NUP93	nucleoporin 93	1.808	3.011
202192_s_at	GAS7	growth arrest specific 7	-4.914	12.045
202202_s_at	LAMA4	laminin subunit alpha 4	2.639	3.561
202205_at	VASP	vasodilator-stimulated phosphoprotein	1.497	3.432
202211_at	ARFGAP3	ADP ribosylation factor GTPase activating protein 3	1.124	2.86
202223_at	STT3A	STT3A, catalytic subunit of the oligosaccharyltransferase complex	2.314	3.715
202228_s_at	NPTN	neuroplastin	-1.188	5.592
202231_at	EIF3M	eukaryotic translation initiation factor 3 subunit M	1.318	10.524
202236_s_at	SLC16A1	solute carrier family 16 member 1	1.842	2.995
202239_at	PARP4	poly(ADP-ribose) polymerase family member 4	1.823	5.394
202240_at	PLK1	polo like kinase 1	1.76	8.134
202242_at	TSPAN7	tetraspanin 7	-4.013	9.017
202246_s_at	CDK4	cyclin dependent kinase 4	2.938	13.015
202252_at	RAB13	RAB13, member RAS oncogene family	1.714	6.022
202254_at	SIPA1L1	signal induced proliferation associated 1 like 1	-1.579	3.286
202258_s_at	N4BP2L2	NEDD4 binding protein 2 like 2	1.132	6.755
202260_s_at	STXBP1	syntaxin binding protein 1	-4.626	16.122
202268_s_at	NAE1	NEDD8 activating enzyme E1 subunit 1	1.213	11.614
202273_at	PDGFRB	platelet derived growth factor receptor beta	1.672	2.964
202274_at	ACTG2	actin, gamma 2, smooth muscle, enteric	2.225	3.585
202276_at	SHFM1	split hand/foot malformation (ectrodactyly) type 1	1.16	7.754
202282_at	HSD17B10	hydroxysteroid 17-beta dehydrogenase 10	1.72	7.471
202308_at	SREBF1	sterol regulatory element binding transcription factor 1	2.171	5.274
202318_s_at	SENP6	SUMO1/sentrin specific peptidase 6	1.132	7.904
202329_at	CSK	c-src tyrosine kinase	1.288	7.591
202330_s_at	UNG	uracil DNA glycosylase	1.536	7.586
202337_at	PMF1	polyamine-modulated factor 1	1.112	5.204
202340_x_at	NR4A1	nuclear receptor subfamily 4 group A member 1	-2.275	3.353
202342_s_at	TRIM2	tripartite motif containing 2	-1.814	3.903
202353_s_at	PSMD12	proteasome 26S subunit, non-ATPase 12	-1.088	7.463
202360_at	MAML1	mastermind like transcriptional coactivator 1	1.034	6.208
202363_at	SPOCK1	sparc/osteonectin, cwcv and kazal-like domains proteoglycan (testican) 1	-4.636	12.246
202365_at	UNC119B	unc-119 lipid binding chaperone B	1.702	8.914
202369_s_at	TRAM2	translocation associated membrane protein 2	3.391	7.923
202375_at	SEC24D	SEC24 homolog D, COPII coat complex component	1.2	1.822
202381_at	ADAM9	ADAM metallopeptidase domain 9	1.647	3.198
202382_s_at	GNPDA1	glucosamine-6-phosphate deaminase 1	1.778	5.509
202390_s_at	HTT	huntingtin	-1.842	9.126
202391_at	BASP1	brain abundant membrane attached signal protein 1	-2.411	4.559
202392_s_at	MIR7109///PISD	microRNA 7109///phosphatidylserine decarboxylase	-1.926	6.144
202393_s_at	KLF10	Kruppel like factor 10	1.878	3.724
202395_at	LOC101930324///NSF	uncharacterized LOC101930324///N-ethylmaleimide sensitive factor, vesicle fusing ATPase	-3.137	16.289
202403_s_at	COL1A2	collagen type I alpha 2 chain	2.977	3.157
202406_s_at	TIAL1	TIA1 cytotoxic granule-associated RNA binding protein-like 1	1.263	10.457
202413_s_at	USP1	ubiquitin specific peptidase 1	1.041	4.199
202418_at	YIF1A	Yip1 interacting factor homolog A, membrane trafficking protein	1.294	5.398
202422_s_at	ACSL4	acyl-CoA synthetase long-chain family member 4	-1.884	2.719
202429_s_at	PPP3CA	protein phosphatase 3 catalytic subunit alpha	-3.701	8.23
202431_s_at	MYC	v-myc avian myelocytomatosis viral oncogene homolog	2.191	2.178
202432_at	PPP3CB	protein phosphatase 3 catalytic subunit beta	-2.017	7.562
202433_at	SLC35B1	solute carrier family 35 member B1	1.308	6.792
202440_s_at	ST5	suppression of tumorigenicity 5	1.545	4.652
202441_at	ERLIN1	ER lipid raft associated 1	1.528	7.993
202446_s_at	PLSCR1	phospholipid scramblase 1	1.206	1.809
202447_at	DECR1	2,4-dienoyl-CoA reductase 1, mitochondrial	1.195	6.569
202452_at	ZER1	zyg-11 related cell cycle regulator	-1.364	5.275
202455_at	HDAC5	histone deacetylase 5	-1.412	6.985
202458_at	PRSS23	protease, serine 23	1.839	2.756
202462_s_at	DDX46	DEAD-box helicase 46	1.028	5.206
202464_s_at	PFKFB3	6-phosphofructo-2-kinase/fructose-2,6-biphosphatase 3	-1.328	3.398
202465_at	PCOLCE	procollagen C-endopeptidase enhancer	2.164	3.762
202468_s_at	CTNNAL1	catenin alpha like 1	2.037	4.657
202469_s_at	CPSF6	cleavage and polyadenylation specific factor 6	1.421	11.948
202475_at	TMEM147	transmembrane protein 147	1.413	8.513
202478_at	TRIB2	tribbles pseudokinase 2	1.248	3.561
202488_s_at	FXYD3	FXYD domain containing ion transport regulator 3	1.037	1.65
202501_at	MAPRE2	microtubule associated protein RP/EB family member 2	-1.989	6.18
202503_s_at	KIAA0101	KIAA0101	8.455	18.854
202505_at	SNRPB2	small nuclear ribonucleoprotein polypeptide B2	1.188	8.28
202508_s_at	SNAP25	synaptosome associated protein 25	-7.992	12.208
202517_at	CRMP1	collapsin response mediator protein 1	-1.481	1.996
202522_at	PITPNB	phosphatidylinositol transfer protein beta	-1.741	10.137
202524_s_at	SPOCK2	sparc/osteonectin, cwcv and kazal-like domains proteoglycan (testican) 2	-4.896	11.675
202527_s_at	SMAD4	SMAD family member 4	1.706	3.798
202531_at	IRF1	interferon regulatory factor 1	1.283	2.313
202534_x_at	DHFR	dihydrofolate reductase	2.343	10.947
202535_at	FADD	Fas associated via death domain	1.009	2.83
202545_at	PRKCD	protein kinase C delta	-1.512	4.259
202562_s_at	C14orf1	chromosome 14 open reading frame 1	1.184	5.058
202565_s_at	SVIL	supervillin	1.498	2.769
202576_s_at	DDX19A///DDX19B	DEAD-box helicase 19A///DEAD-box helicase 19B	1.464	5.618
202577_s_at	DDX19A	DEAD-box helicase 19A	1.261	8.267
202580_x_at	FOXM1	forkhead box M1	4.842	15.028
202587_s_at	AK1	adenylate kinase 1	-1.505	3.243
202589_at	TYMS	thymidylate synthetase	5.988	14.502
202590_s_at	PDK2	pyruvate dehydrogenase kinase 2	-1.415	5.411
202591_s_at	SSBP1	single stranded DNA binding protein 1	1.255	10.07
202599_s_at	NRIP1	nuclear receptor interacting protein 1	-2.885	7.029
202605_at	GUSB	glucuronidase beta	1.5	6.317
202610_s_at	MED14	mediator complex subunit 14	2.114	9.135
202613_at	CTPS1	CTP synthase 1	1.152	4.303
202616_s_at	MECP2	methyl-CpG binding protein 2	-1.601	5.577
202620_s_at	PLOD2	procollagen-lysine,2-oxoglutarate 5-dioxygenase 2	-1.128	1.732
202621_at	IRF3	interferon regulatory factor 3	1.091	3.295
202627_s_at	SERPINE1	serpin family E member 1	2.08	3.02
202637_s_at	ICAM1	intercellular adhesion molecule 1	2.405	4.015
202644_s_at	TNFAIP3	TNF alpha induced protein 3	4.615	8.858
202645_s_at	MEN1	menin 1	1.067	3.831
202650_s_at	MIR6785///TMEM94	microRNA 6785///transmembrane protein 94	1.162	3.527
202652_at	APBB1	amyloid beta precursor protein binding family B member 1	-1.95	9.713
202655_at	MANF	mesencephalic astrocyte derived neurotrophic factor	1.308	5.244
202658_at	PEX11B	peroxisomal biogenesis factor 11 beta	-1.043	5.728
202666_s_at	ACTL6A	actin like 6A	3.506	10.167
202688_at	TNFSF10	tumor necrosis factor superfamily member 10	1.931	3.595
202689_at	RBM15B	RNA binding motif protein 15B	1.155	6.535
202690_s_at	SNRPD1	small nuclear ribonucleoprotein D1 polypeptide	1.686	11.186
202696_at	OXSR1	oxidative stress responsive 1	1.045	3.718
202705_at	CCNB2	cyclin B2	6.655	23.308
202706_s_at	UMPS	uridine monophosphate synthetase	2.042	13.089
202708_s_at	HIST2H2BE	histone cluster 2, H2be	-1.454	3.284
202711_at	EFNB1	ephrin B1	1.045	3.344
202712_s_at	CKMT1A///CKMT1B	creatine kinase, mitochondrial 1A///creatine kinase, mitochondrial 1B	-8.03	14.457
202713_s_at	KIAA0391///PSMA6	KIAA0391///proteasome subunit alpha 6	1.054	6.11
202715_at	CAD	carbamoyl-phosphate synthetase 2, aspartate transcarbamylase, and dihydroorotase	2.891	11.759
202718_at	IGFBP2	insulin like growth factor binding protein 2	3.308	4.61
202720_at	TES	testin LIM domain protein	1.4	2.401
202726_at	LIG1	DNA ligase 1	2.296	7.192
202729_s_at	LTBP1	latent transforming growth factor beta binding protein 1	1.925	2.304
202733_at	LOC101927705///P4HA2	uncharacterized LOC101927705///prolyl 4-hydroxylase subunit alpha 2	1.457	1.876
202734_at	TRIP10	thyroid hormone receptor interactor 10	3.216	7.73
202740_at	ABHD14A-ACY1///ACY1	ABHD14A-ACY1 readthrough///aminoacylase 1	1.595	3.569
202741_at	PRKACB	protein kinase cAMP-activated catalytic subunit beta	-2.27	11.58
202750_s_at	TFIP11	tuftelin interacting protein 11	-1.28	4.69
202754_at	R3HDM1	R3H domain containing 1	-1.663	3.606
202758_s_at	RFXANK	regulatory factor X associated ankyrin containing protein	2.082	9.099
202761_s_at	SYNE2	spectrin repeat containing nuclear envelope protein 2	1.708	2.054
202762_at	ROCK2	Rho associated coiled-coil containing protein kinase 2	-1.466	5.789
202766_s_at	FBN1	fibrillin 1	3.611	5.664
202779_s_at	UBE2S	ubiquitin conjugating enzyme E2 S	1.021	3.817
202780_at	OXCT1	3-oxoacid CoA-transferase 1	-2.473	10.7
202788_at	MAPKAPK3	mitogen-activated protein kinase-activated protein kinase 3	1.718	4.004
202793_at	LPCAT3	lysophosphatidylcholine acyltransferase 3	1.582	3.562
202794_at	INPP1	inositol polyphosphate-1-phosphatase	-1.953	4.718
202800_at	SLC1A3	solute carrier family 1 member 3	-3.306	4.733
202804_at	ABCC1	ATP binding cassette subfamily C member 1	2.269	10.44
202806_at	DBN1	drebrin 1	1.51	6.043
202812_at	GAA	glucosidase alpha, acid	2.264	7.64
202817_s_at	SS18	SS18, nBAF chromatin remodeling complex subunit	1.778	5.065
202825_at	SLC25A4	solute carrier family 25 member 4	-1.176	3.66
202830_s_at	SLC37A4	solute carrier family 37 member 4	1.875	7.045
202834_at	AGT	angiotensinogen	-6.278	13.402
202846_s_at	PIGC	phosphatidylinositol glycan anchor biosynthesis class C	1.512	6.486
202847_at	PCK2	phosphoenolpyruvate carboxykinase 2, mitochondrial	1.012	2.599
202853_s_at	RYK	receptor-like tyrosine kinase	2.111	11.531
202854_at	HPRT1	hypoxanthine phosphoribosyltransferase 1	-2.161	7.267
202859_x_at	CXCL8	C-X-C motif chemokine ligand 8	2.478	4.852
202860_at	DENND4B	DENN domain containing 4B	-1.155	6.868
202861_at	MIR6883///PER1	microRNA 6883///period circadian clock 1	-1.405	4.61
202870_s_at	CDC20	cell division cycle 20	5.341	20.383
202871_at	TRAF4	TNF receptor associated factor 4	1.355	4.757
202878_s_at	CD93	CD93 molecule	2.339	2.702
202887_s_at	DDIT4	DNA damage inducible transcript 4	1.365	3.316
202888_s_at	ANPEP	alanyl aminopeptidase, membrane	1.356	3.23
202890_at	MAP7	microtubule associated protein 7	-3.1	5.931
202892_at	CDC23	cell division cycle 23	1.2	7.043
202897_at	SIRPA	signal regulatory protein alpha	-4.039	10.983
202900_s_at	NUP88	nucleoporin 88	1.269	6.932
202901_x_at	CTSS	cathepsin S	1.228	1.831
202908_at	WFS1	wolframin ER transmembrane glycoprotein	-1.977	8.905
202911_at	MSH6	mutS homolog 6	1.536	7.338
202912_at	ADM	adrenomedullin	2.2	2.646
202917_s_at	S100A8	S100 calcium binding protein A8	-2.118	2.095
202920_at	ANK2	ankyrin 2, neuronal	-2.573	8.765
202923_s_at	GCLC	glutamate-cysteine ligase catalytic subunit	-1.557	5.74
202925_s_at	PLAGL2	PLAG1 like zinc finger 2	2.376	8.731
202927_at	PIN1	peptidylprolyl cis/trans isomerase, NIMA-interacting 1	-1.992	8.749
202930_s_at	SUCLA2	succinate-CoA ligase ADP-forming beta subunit	-1.247	6.783
202933_s_at	YES1	YES proto-oncogene 1, Src family tyrosine kinase	1.276	5.7
202934_at	HK2	hexokinase 2	2.925	5.448
202945_at	FPGS	folylpolyglutamate synthase	2.375	10.927
202946_s_at	BTBD3	BTB domain containing 3	-1.007	3.044
202947_s_at	GYPC	glycophorin C (Gerbich blood group)	1.49	2.283
202950_at	CRYZ	crystallin zeta	2.654	11.647
202951_at	STK38	serine/threonine kinase 38	1.154	4.369
202954_at	UBE2C	ubiquitin conjugating enzyme E2 C	6.475	21.88
202958_at	PTPN9	protein tyrosine phosphatase, non-receptor type 9	2.374	5.576
202973_x_at	FAM13A	family with sequence similarity 13 member A	-2.087	3.6
202974_at	MPP1	membrane palmitoylated protein 1	-1.719	7.004
202983_at	HLTF	helicase like transcription factor	1.041	4.831
202990_at	PYGL	phosphorylase, glycogen, liver	1.469	1.705
202992_at	C7	complement component 7	-1.416	2.866
202998_s_at	LOXL2	lysyl oxidase like 2	3.373	3.587
203000_at	STMN2	stathmin 2	-7.192	9.234
203002_at	AMOTL2	angiomotin like 2	1.476	4.039
203006_at	INPP5A	inositol polyphosphate-5-phosphatase A	-1.375	4.806
203017_s_at	SSX2IP	SSX family member 2 interacting protein	-1.487	2.147
203020_at	RABGAP1L	RAB GTPase activating protein 1 like	-1.027	2.206
203022_at	RNASEH2A	ribonuclease H2 subunit A	4.551	14.606
203024_s_at	C5orf15	chromosome 5 open reading frame 15	1.531	8.666
203026_at	ZBTB5	zinc finger and BTB domain containing 5	1.556	5.14
203029_s_at	PTPRN2	protein tyrosine phosphatase, receptor type N2	-3.591	6.478
203034_s_at	SNORA3A///RPL27A	small nucleolar RNA, H/ACA box 3A///ribosomal protein L27a	1.053	11.354
203040_s_at	HMBS	hydroxymethylbilane synthase	2.504	12.221
203044_at	CHSY1	chondroitin sulfate synthase 1	1.02	4.845
203046_s_at	TIMELESS	timeless circadian clock	4.238	15.202
203049_s_at	TTC37	tetratricopeptide repeat domain 37	1.241	3.248
203051_at	BAHD1	bromo adjacent homology domain containing 1	1.151	3.174
203057_s_at	PRDM2	PR/SET domain 2	1.045	3.203
203063_at	PPM1F	protein phosphatase, Mg2+/Mn2+ dependent 1F	-1.136	4.56
203064_s_at	FOXK2	forkhead box K2	1.038	3.05
203069_at	SV2A	synaptic vesicle glycoprotein 2A	-2.684	11.056
203072_at	MYO1E	myosin IE	2.156	6.176
203081_at	CTNNBIP1	catenin beta interacting protein 1	1.097	4.436
203083_at	THBS2	thrombospondin 2	-3.049	4.644
203085_s_at	TGFB1	transforming growth factor beta 1	1.723	2.363
203093_s_at	TIMM44	translocase of inner mitochondrial membrane 44	1.053	3.861
203097_s_at	RAPGEF2	Rap guanine nucleotide exchange factor 2	-1.193	2.706
203098_at	CDYL	chromodomain Y-like	1.247	6.649
203102_s_at	MGAT2	mannosyl (alpha-1,6-)-glycoprotein beta-1,2-N-acetylglucosaminyltransferase	1.241	6.192
203107_x_at	SNORA64///RPS2	small nucleolar RNA, H/ACA box 64///ribosomal protein S2	1.066	15.928
203110_at	PTK2B	protein tyrosine kinase 2 beta	-3.276	7.309
203126_at	IMPA2	inositol monophosphatase 2	1.845	3.305
203130_s_at	KIF5C	kinesin family member 5C	-3.181	10.246
203133_at	SEC61B	Sec61 translocon beta subunit	1.193	11.129
203138_at	HAT1	histone acetyltransferase 1	1.378	6.664
203139_at	DAPK1	death associated protein kinase 1	-1.466	2.53
203140_at	BCL6	B-cell CLL/lymphoma 6	-1.633	5.917
203142_s_at	AP3B1	adaptor related protein complex 3 beta 1 subunit	1.739	5.567
203145_at	SPAG5	sperm associated antigen 5	1.417	2.933
203146_s_at	GABBR1	gamma-aminobutyric acid type B receptor subunit 1	-5.92	9
203151_at	MAP1A	microtubule associated protein 1A	-3.725	15.286
203155_at	SETDB1	SET domain bifurcated 1	1.992	9.72
203156_at	AKAP11	A-kinase anchoring protein 11	-1.909	9.516
203162_s_at	KATNB1	katanin regulatory subunit B1	-1.727	5.354
203164_at	SLC33A1	solute carrier family 33 member 1	1.056	2.62
203177_x_at	TFAM	transcription factor A, mitochondrial	1.329	3.288
203182_s_at	SRPK2	SRSF protein kinase 2	-1.195	5.592
203184_at	FBN2	fibrillin 2	6.633	10.782
203186_s_at	S100A4	S100 calcium binding protein A4	5.125	5.454
203187_at	DOCK1	dedicator of cytokinesis 1	2.037	4.996
203188_at	B4GAT1	beta-1,4-glucuronyltransferase 1	-1.632	10.476
203195_s_at	NUP98	nucleoporin 98	1.096	5.184
203196_at	ABCC4	ATP binding cassette subfamily C member 4	2.982	5.554
203200_s_at	MTRR	5-methyltetrahydrofolate-homocysteine methyltransferase reductase	-1.038	4.888
203201_at	PMM2	phosphomannomutase 2	1.658	4.709
203203_s_at	KRR1	KRR1, small subunit processome component homolog	1.499	7.386
203208_s_at	MTFR1	mitochondrial fission regulator 1	1.719	7.015
203213_at	CDK1	cyclin dependent kinase 1	6.56	18.294
203217_s_at	ST3GAL5	ST3 beta-galactoside alpha-2,3-sialyltransferase 5	-2.072	6.953
203218_at	MAPK9	mitogen-activated protein kinase 9	-1.603	8.961
203228_at	PAFAH1B3	platelet activating factor acetylhydrolase 1b catalytic subunit 3	2.057	5.743
203232_s_at	ATXN1	ataxin 1	-2.824	8.579
203238_s_at	NOTCH3	notch 3	4.046	11.332
203239_s_at	CNOT3	CCR4-NOT transcription complex subunit 3	1.919	5.852
203249_at	EZH1	enhancer of zeste 1 polycomb repressive complex 2 subunit	-1.386	7.355
203253_s_at	PPIP5K2	diphosphoinositol pentakisphosphate kinase 2	1.142	2.918
203254_s_at	TLN1	talin 1	2.267	3.374
203256_at	CDH3	cadherin 3	3.414	4.16
203264_s_at	ARHGEF9	Cdc42 guanine nucleotide exchange factor 9	-2.036	5.174
203266_s_at	MAP2K4	mitogen-activated protein kinase kinase 4	-1.608	10.299
203267_s_at	DRG2	developmentally regulated GTP binding protein 2	1.433	3.641
203273_s_at	TUSC2	tumor suppressor candidate 2	-1.941	12.1
203276_at	LMNB1	lamin B1	3.749	8.371
203278_s_at	PHF21A	PHD finger protein 21A	1.438	5.571
203288_at	KIAA0355	KIAA0355	1.117	2.736
203289_s_at	NPRL3	NPR3 like, GATOR1 complex subunit	1.447	2.599
203290_at	HLA-DQA1	major histocompatibility complex, class II, DQ alpha 1	2.02	3.299
203292_s_at	VPS11	VPS11, CORVET/HOPS core subunit	-1.159	6.182
203296_s_at	ATP1A2	ATPase Na+/K+ transporting subunit alpha 2	-3.791	9.949
203303_at	DYNLT3	dynein light chain Tctex-type 3	-1.641	8.552
203313_s_at	TGIF1	TGFB induced factor homeobox 1	4.422	8.798
203316_s_at	SNRPE	small nuclear ribonucleoprotein polypeptide E	1.827	12.131
203321_s_at	ADNP2	ADNP homeobox 2	1.132	4.372
203325_s_at	COL5A1	collagen type V alpha 1 chain	3.459	5.145
203330_s_at	STX5	syntaxin 5	1.293	3.598
203340_s_at	SLC25A12	solute carrier family 25 member 12	-1.605	4.886
203343_at	UGDH	UDP-glucose 6-dehydrogenase	2.338	5.89
203344_s_at	RBBP8	RB binding protein 8, endonuclease	2.689	6.527
203345_s_at	MTF2	metal response element binding transcription factor 2	1.383	3.655
203356_at	CAPN7	calpain 7	1.048	4.756
203358_s_at	EZH2	enhancer of zeste 2 polycomb repressive complex 2 subunit	5.739	15.585
203359_s_at	GJA9-MYCBP///MYCBP	GJA9-MYCBP readthrough///MYC binding protein	2.23	4.623
203360_s_at	GJA9-MYCBP///GJA9///MYCBP	GJA9-MYCBP readthrough///gap junction protein alpha 9///MYC binding protein	2.157	5.899
203362_s_at	MAD2L1	MAD2 mitotic arrest deficient-like 1 (yeast)	3.409	7.646
203364_s_at	ATG13	autophagy related 13	-1.576	10.882
203365_s_at	MMP15	matrix metallopeptidase 15	4.314	8.741
203368_at	CRELD1	cysteine rich with EGF like domains 1	-1.494	4.9
203386_at	TBC1D4	TBC1 domain family member 4	-1.166	4.193
203389_at	KIF3C	kinesin family member 3C	-3.722	10.365
203391_at	FKBP2	FK506 binding protein 2	-1.057	3.194
203395_s_at	HES1	hes family bHLH transcription factor 1	2.627	6.703
203402_at	KCNAB2	potassium voltage-gated channel subfamily A regulatory beta subunit 2	-5.369	16.928
203403_s_at	RNF6	ring finger protein 6	-1.165	3.203
203405_at	PSMG1	proteasome assembly chaperone 1	1.168	2.454
203406_at	MFAP1	microfibrillar associated protein 1	1.051	5.784
203408_s_at	SATB1	SATB homeobox 1	-3.356	5.858
203409_at	DDB2	damage specific DNA binding protein 2	2.736	8.22
203410_at	AP3M2	adaptor related protein complex 3 mu 2 subunit	-1.741	10.227
203411_s_at	LMNA	lamin A/C	1.834	3.796
203413_at	NELL2	neural EGFL like 2	-1.564	2.06
203414_at	MMD	monocyte to macrophage differentiation associated	-1.615	2.759
203417_at	MFAP2	microfibrillar associated protein 2	7.301	15.759
203422_at	POLD1	DAN polymerase delta 1, catalytic subunit	2.948	12.274
203430_at	HEBP2	heme binding protein 2	1.914	7.021
203436_at	RPP30	ribonuclease P/MRP subunit p30	1.077	4.182
203438_at	STC2	stanniocalcin 2	2.369	4.5
203442_x_at	EML3	echinoderm microtubule associated protein like 3	1.104	2.579
203458_at	SPR	sepiapterin reductase (7,8-dihydrobiopterin:NADP+ oxidoreductase)	-1.166	1.733
203462_x_at	EIF3B	eukaryotic translation initiation factor 3 subunit B	1.101	5.863
203467_at	PMM1	phosphomannomutase 1	-1.689	5.73
203473_at	SLCO2B1	solute carrier organic anion transporter family member 2B1	-1.309	3.652
203474_at	IQGAP2	IQ motif containing GTPase activating protein 2	5.689	9.747
203485_at	RTN1	reticulon 1	-3.916	7.689
203487_s_at	ARMC8	armadillo repeat containing 8	-1.592	5.018
203497_at	MED1	mediator complex subunit 1	1.684	9.425
203498_at	RCAN2	regulator of calcineurin 2	-5.987	13.135
203499_at	EPHA2	EPH receptor A2	1.917	4.288
203505_at	ABCA1	ATP binding cassette subfamily A member 1	1.957	6.294
203508_at	TNFRSF1B	TNF receptor superfamily member 1B	-2.175	3.523
203510_at	MET	MET proto-oncogene, receptor tyrosine kinase	-2.685	1.736
203514_at	MAP3K3	mitogen-activated protein kinase kinase kinase 3	-1.663	3.651
203516_at	SNTA1	syntrophin alpha 1	-2.673	4.647
203518_at	LYST	lysosomal trafficking regulator	-1.613	2.786
203521_s_at	ZNF318	zinc finger protein 318	1.024	3.645
203525_s_at	APC	APC, WNT signaling pathway regulator	-1.508	3.259
203540_at	GFAP	glial fibrillary acidic protein	-3.478	5.377
203543_s_at	KLF9	Kruppel like factor 9	-1.47	1.926
203545_at	ALG8	ALG8, alpha-1,3-glucosyltransferase	1.734	9.93
203546_at	IPO13	importin 13	-1.007	3.477
203552_at	MAP4K5	mitogen-activated protein kinase kinase kinase kinase 5	1.022	2.335
203554_x_at	PTTG1	pituitary tumor-transforming 1	2.826	6.199
203557_s_at	PCBD1	pterin-4 alpha-carbinolamine dehydratase 1	1.477	3.256
203558_at	CUL7	cullin 7	2.264	7.093
203560_at	GGH	gamma-glutamyl hydrolase	2.039	5.472
203562_at	FEZ1	fasciculation and elongation protein zeta 1	-1.218	3.354
203564_at	FANCG	Fanconi anemia complementation group G	2.868	5.342
203569_s_at	OFD1	OFD1, centriole and centriolar satellite protein	1.056	3.586
203570_at	LOXL1	lysyl oxidase like 1	5.619	8.478
203571_s_at	ADIRF	adipogenesis regulatory factor	-4.746	11.297
203574_at	NFIL3	nuclear factor, interleukin 3 regulated	-2.225	3.817
203583_at	UNC50	unc-50 inner nuclear membrane RNA binding protein	1.036	9.494
203585_at	ZNF185	zinc finger protein 185 (LIM domain)	2.481	3.523
203593_at	CD2AP	CD2 associated protein	2.094	7.56
203599_s_at	WBP4	WW domain binding protein 4	-1.103	8.838
203600_s_at	FAM193A	family with sequence similarity 193 member A	1.217	5.492
203603_s_at	ZEB2	zinc finger E-box binding homeobox 2	-2.175	2.518
203607_at	INPP5F	inositol polyphosphate-5-phosphatase F	-2.275	9.2
203608_at	ALDH5A1	aldehyde dehydrogenase 5 family member A1	-1.377	6.93
203612_at	BYSL	bystin like	1.142	6.651
203615_x_at	SULT1A1	sulfotransferase family 1A member 1	-1.932	6.74
203619_s_at	FAIM2	Fas apoptotic inhibitory molecule 2	-6.211	11.57
203622_s_at	PNO1	partner of NOB1 homolog	1.2	3.888
203625_x_at	SKP2	S-phase kinase-associated protein 2, E3 ubiquitin protein ligase	2.37	12.407
203632_s_at	GPRC5B	G protein-coupled receptor class C group 5 member B	-2.093	4.145
203633_at	CPT1A	carnitine palmitoyltransferase 1A	1.37	3.08
203637_s_at	MID1	midline 1	1.426	2.607
203640_at	MBNL2	muscleblind like splicing regulator 2	-2.154	9.303
203643_at	ERF	ETS2 repressor factor	1.827	5.829
203647_s_at	FDX1	ferredoxin 1	1.616	5.194
203650_at	PROCR	protein C receptor	3.126	3.579
203654_s_at	COIL	coilin	1.267	5.672
203655_at	XRCC1	X-ray repair cross complementing 1	1.244	4.665
203661_s_at	TMOD1	tropomodulin 1	-5.353	8.336
203664_s_at	POLR2D	RNA polymerase II subunit D	1.067	4.222
203665_at	HMOX1	heme oxygenase 1	1.487	2.403
203671_at	TPMT	thiopurine S-methyltransferase	-2.537	12.353
203675_at	NUCB2	nucleobindin 2	1.404	10.094
203677_s_at	TARBP2	TARBP2, RISC loading complex RNA binding subunit	2.122	6.487
203680_at	PRKAR2B	protein kinase cAMP-dependent type II regulatory subunit beta	-1.482	2.157
203683_s_at	VEGFB	vascular endothelial growth factor B	1.042	1.847
203693_s_at	E2F3	E2F transcription factor 3	2.006	5.411
203695_s_at	DFNA5	DFNA5, deafness associated tumor suppressor	-1.398	2.016
203700_s_at	DIO2	deiodinase, iodothyronine, type II	-4.314	5.931
203702_s_at	TTLL4	tubulin tyrosine ligase like 4	2.31	4.88
203704_s_at	RREB1	ras responsive element binding protein 1	2.776	9.228
203706_s_at	FZD7	frizzled class receptor 7	2.747	5.292
203708_at	PDE4B	phosphodiesterase 4B	-2.513	4.333
203710_at	ITPR1	inositol 1,4,5-trisphosphate receptor type 1	-4.92	8.721
203712_at	PUM3	pumilio RNA binding family member 3	2.768	7.684
203720_s_at	ERCC1	ERCC excision repair 1, endonuclease non-catalytic subunit	1.372	7.386
203723_at	ITPKB	inositol-trisphosphate 3-kinase B	-2.49	2.647
203729_at	EMP3	epithelial membrane protein 3	3.157	3.367
203730_s_at	ZKSCAN5	zinc finger with KRAB and SCAN domains 5	1.009	4.186
203732_at	TRIP4	thyroid hormone receptor interactor 4	1.551	9.619
203733_at	DEXI	Dexi homolog	-1.343	6.264
203737_s_at	PPRC1	peroxisome proliferator-activated receptor gamma, coactivator-related 1	1.521	7.256
203739_at	ZNF217	zinc finger protein 217	5.272	12.684
203742_s_at	LOC732360///TDG	G/T mismatch-specific thymine DNA glycosylase-like///thymine DNA glycosylase	1.479	3.986
203743_s_at	TDG	thymine DNA glycosylase	2.103	5.889
203745_at	HCCS	holocytochrome c synthase	-1.51	6.077
203755_at	BUB1B	BUB1 mitotic checkpoint serine/threonine kinase B	7.134	16.952
203764_at	DLGAP5	DLG associated protein 5	6.547	27.029
203766_s_at	LMOD1	leiomodin 1	-1.207	2.618
203767_s_at	STS	steroid sulfatase (microsomal), isozyme S	-2.845	5.591
203775_at	SLC25A13	solute carrier family 25 member 13	2.345	5.367
203790_s_at	RIDA	reactive intermediate imine deaminase A homolog	-1.148	4.161
203794_at	CDC42BPA	CDC42 binding protein kinase alpha	-1.615	8.25
203797_at	VSNL1	visinin like 1	-9.893	19.283
203799_at	LY75-CD302///CD302///LY75	LY75-CD302 readthrough///CD302 molecule///lymphocyte antigen 75	-1.892	4.037
203810_at	DNAJB4	DnaJ heat shock protein family (Hsp40) member B4	-1.106	2.695
203812_at	SLIT3	slit guidance ligand 3	-1.45	2.835
203817_at	GUCY1B3	guanylate cyclase 1 soluble subunit beta	-3.417	11.534
203820_s_at	IGF2BP3	insulin like growth factor 2 mRNA binding protein 3	5.799	9.698
203826_s_at	PITPNM1	phosphatidylinositol transfer protein membrane associated 1	-2.72	5.579
203828_s_at	IL32	interleukin 32	1.328	2.215
203830_at	C17orf75	chromosome 17 open reading frame 75	1.19	3.197
203832_at	SNRPF	small nuclear ribonucleoprotein polypeptide F	2.012	11.4
203837_at	MAP3K5	mitogen-activated protein kinase kinase kinase 5	-4.098	12.652
203839_s_at	TNK2	tyrosine kinase non receptor 2	-1.673	6.848
203842_s_at	MAPRE3	microtubule associated protein RP/EB family member 3	-1.581	8.633
203852_s_at	SMN2///SMN1	survival of motor neuron 2, centromeric///survival of motor neuron 1, telomeric	1.86	4.972
203855_at	WDR47	WD repeat domain 47	-2.19	6.923
203857_s_at	MIR7110///PDIA5	microRNA 7110///protein disulfide isomerase family A member 5	4.763	10.254
203859_s_at	PALM	paralemmin	-1.201	3.44
203862_s_at	ACTN2	actinin alpha 2	-2.186	3.548
203865_s_at	ADARB1	adenosine deaminase, RNA specific B1	-4.526	17.028
203867_s_at	NLE1	notchless homolog 1	1.304	5.185
203870_at	USP46	ubiquitin specific peptidase 46	-2.379	8.11
203875_at	SMARCA1	SWI/SNF related, matrix associated, actin dependent regulator of chromatin, subfamily a, member 1	1.173	5.102
203881_s_at	DMD	dystrophin	1.443	2.498
203883_s_at	RAB11FIP2	RAB11 family interacting protein 2	-1.175	4.472
203889_at	SCG5	secretogranin V	-3.616	4.335
203894_at	TUBG2	tubulin gamma 2	-2.421	8.991
203895_at	PLCB4	phospholipase C beta 4	-3.822	6.358
203903_s_at	HEPH	hephaestin	-4.883	11.038
203904_x_at	CD82	CD82 molecule	1.645	3.798
203906_at	IQSEC1	IQ motif and Sec7 domain 1	-2.754	11.89
203908_at	SLC4A4	solute carrier family 4 member 4	-5.334	8.725
203909_at	SLC9A6	solute carrier family 9 member A6	-2.157	7.857
203910_at	ARHGAP29	Rho GTPase activating protein 29	-1.242	2.117
203911_at	RAP1GAP	RAP1 GTPase activating protein	-3.762	11.734
203919_at	TCEA2	transcription elongation factor A2	-1.31	5.718
203925_at	GCLM	glutamate-cysteine ligase modifier subunit	1.095	2.624
203929_s_at	MAPT	microtubule associated protein tau	-4.89	8.143
203936_s_at	MMP9	matrix metallopeptidase 9	3.71	6.108
203939_at	NT5E	5'-nucleotidase ecto	-2.061	2.523
203941_at	INTS9	integrator complex subunit 9	1.533	7.745
203946_s_at	ARG2	arginase 2	-1.429	1.971
203950_s_at	CLCN6	chloride voltage-gated channel 6	-1.728	9.095
203951_at	CNN1	calponin 1	1.519	2.81
203954_x_at	CLDN3	claudin 3	1.916	2.222
203957_at	E2F6	E2F transcription factor 6	1.729	8.999
203961_at	NEBL	nebulette	-1.764	2.031
203965_at	USP20	ubiquitin specific peptidase 20	-1.886	5.083
203968_s_at	CDC6	cell division cycle 6	3.288	8.181
203973_s_at	CEBPD	CCAAT/enhancer binding protein delta	-1.493	2.549
203978_at	NUBP1	nucleotide binding protein 1	1.314	4.309
203981_s_at	ABCD4	ATP binding cassette subfamily D member 4	1.091	2.854
203987_at	FZD6	frizzled class receptor 6	3.039	3.189
203989_x_at	F2R	coagulation factor II thrombin receptor	5.77	13.826
203992_s_at	KDM6A	lysine demethylase 6A	2.091	6.154
203999_at	SYT1	synaptotagmin 1	-5.719	7.382
204000_at	GNB5	G protein subunit beta 5	-3.266	11.177
204015_s_at	DUSP4	dual specificity phosphatase 4	2.716	3.045
204017_at	KDELR3	KDEL endoplasmic reticulum protein retention receptor 3	3.31	5.994
204019_s_at	SH3YL1	SH3 and SYLF domain containing 1	-1.096	4.267
204020_at	PURA	purine rich element binding protein A	-1.702	11.4
204023_at	RFC4	replication factor C subunit 4	2.178	9.255
204026_s_at	ZWINT	ZW10 interacting kinetochore protein	4.089	11.876
204030_s_at	IQCJ-SCHIP1///SCHIP1	IQCJ-SCHIP1 readthrough///schwannomin interacting protein 1	-1.388	3.665
204033_at	TRIP13	thyroid hormone receptor interactor 13	2.998	6.213
204039_at	CEBPA	CCAAT/enhancer binding protein alpha	-1.101	3.382
204040_at	RNF144A	ring finger protein 144A	-2.078	4.244
204041_at	MAOB	monoamine oxidase B	-5.871	11.241
204042_at	WASF3	WAS protein family member 3	-3.161	7.002
204043_at	TCN2	transcobalamin 2	1.698	2.956
204051_s_at	SFRP4	secreted frizzled related protein 4	2.823	3.181
204059_s_at	ME1	malic enzyme 1	-5.195	9.968
204060_s_at	PRKY///PRKX	protein kinase, Y-linked, pseudogene///protein kinase, X-linked	2.183	6.255
204061_at	PRKX	protein kinase, X-linked	2.007	3.598
204064_at	THOC1	THO complex 1	1.03	4.12
204068_at	STK3	serine/threonine kinase 3	1.286	3.394
204072_s_at	FRY	FRY microtubule binding protein	-3.74	6.732
204073_s_at	MYRF	myelin regulatory factor	-4.586	6.186
204076_at	ENTPD4	ectonucleoside triphosphate diphosphohydrolase 4	-1.749	10.419
204078_at	P3H4	prolyl 3-hydroxylase family member 4 (non-enzymatic)	2.924	10.655
204079_at	TPST2	tyrosylprotein sulfotransferase 2	-1.424	1.693
204081_at	NRGN	neurogranin	-4.603	2.994
204082_at	PBX3	PBX homeobox 3	2.797	4.137
204083_s_at	TPM2	tropomyosin 2 (beta)	2.89	2.731
204086_at	PRAME	preferentially expressed antigen in melanoma	6.858	12.111
204087_s_at	SLC5A6	solute carrier family 5 member 6	1.681	4.134
204088_at	P2RX4	purinergic receptor P2X 4	2.069	4.186
204103_at	CCL4	C-C motif chemokine ligand 4	1.405	3.938
204105_s_at	NRCAM	neuronal cell adhesion molecule	-3.843	8.432
204112_s_at	HNMT	histamine N-methyltransferase	-2.905	6.427
204114_at	NID2	nidogen 2	3.236	5.491
204123_at	LIG3	DNA ligase 3	1.795	9.014
204124_at	SLC34A2	solute carrier family 34 member 2	1.367	3.215
204126_s_at	CDC45	cell division cycle 45	1.114	3.914
204127_at	RFC3	replication factor C subunit 3	2.072	5.363
204134_at	PDE2A	phosphodiesterase 2A	-4.956	7.802
204137_at	GPR137B	G protein-coupled receptor 137B	-1.653	4.89
204140_at	TPST1	tyrosylprotein sulfotransferase 1	-1.583	2.661
204141_at	TUBB2A	tubulin beta 2A class IIa	-1.673	4.676
204142_at	ENOSF1	enolase superfamily member 1	1.666	2.764
204146_at	RAD51AP1	RAD51 associated protein 1	3.901	11.562
204148_s_at	POMZP3///ZP3	POM121 and ZP3 fusion///zona pellucida glycoprotein 3 (sperm receptor)	2.04	4.326
204151_x_at	AKR1C1	aldo-keto reductase family 1 member C1	-5.225	11.01
204154_at	CDO1	cysteine dioxygenase type 1	1.423	3.12
204158_s_at	TCIRG1	T-cell immune regulator 1, ATPase H+ transporting V0 subunit a3	1.355	2.13
204159_at	CDKN2C	cyclin dependent kinase inhibitor 2C	1.402	1.601
204160_s_at	ENPP4	ectonucleotide pyrophosphatase/phosphodiesterase 4 (putative)	-2.164	5.507
204162_at	NDC80	NDC80, kinetochore complex component	5.442	24.167
204165_at	WASF1	WAS protein family member 1	-1.461	2.65
204168_at	MGST2	microsomal glutathione S-transferase 2	-1.644	3.236
204170_s_at	CKS2	CDC28 protein kinase regulatory subunit 2	3.17	9.336
204175_at	ZNF593	zinc finger protein 593	1.174	3.325
204198_s_at	RUNX3	runt related transcription factor 3	1.482	1.865
204199_at	RALGPS1	Ral GEF with PH domain and SH3 binding motif 1	-2.507	7.042
204204_at	SLC31A2	solute carrier family 31 member 2	-1.588	2.641
204212_at	ACOT8	acyl-CoA thioesterase 8	-1.915	7.059
204214_s_at	RAB32	RAB32, member RAS oncogene family	2.25	5.328
204215_at	TMEM243	transmembrane protein 243	-1.287	3.641
204225_at	HDAC4	histone deacetylase 4	-1.55	3.126
204230_s_at	SLC17A7	solute carrier family 17 member 7	-5.342	5.805
204231_s_at	FAAH	fatty acid amide hydrolase	-2.03	4.586
204234_s_at	ZNF195	zinc finger protein 195	2.048	7.547
204238_s_at	DNPH1	2'-deoxynucleoside 5'-phosphate N-hydrolase 1	1.631	4.157
204241_at	ACOX3	acyl-CoA oxidase 3, pristanoyl	1.561	4.696
204244_s_at	DBF4	DBF4 zinc finger	1.855	5.078
204247_s_at	CDK5	cyclin dependent kinase 5	-1.841	7.573
204252_at	CDK2	cyclin dependent kinase 2	4.866	13.093
204256_at	ELOVL6	ELOVL fatty acid elongase 6	1.591	4.615
204257_at	FADS3	fatty acid desaturase 3	-1.423	4.167
204258_at	CHD1	chromodomain helicase DNA binding protein 1	1.572	4.114
204260_at	CHGB	chromogranin B	-5.847	7.775
204268_at	S100A2	S100 calcium binding protein A2	1.575	2.034
204275_at	CAPN15	calpain 15	1.924	3.053
204276_at	TK2	thymidine kinase 2, mitochondrial	-1.121	4.544
204281_at	TEAD4	TEA domain transcription factor 4	1.876	5.272
204283_at	FARS2	phenylalanyl-tRNA synthetase 2, mitochondrial	1.187	2.741
204284_at	PPP1R3C	protein phosphatase 1 regulatory subunit 3C	-2.977	3.244
204285_s_at	PMAIP1	phorbol-12-myristate-13-acetate-induced protein 1	1.809	2.55
204287_at	SYNGR1	synaptogyrin 1	-4.984	13.284
204291_at	ZNF518A	zinc finger protein 518A	1.561	2.777
204294_at	AMT	aminomethyltransferase	-2.654	5.176
204300_at	GATB	glutamyl-tRNA amidotransferase subunit B	-1.898	4.886
204301_at	KBTBD11	kelch repeat and BTB domain containing 11	-4.213	10.356
204303_s_at	CTIF	cap binding complex dependent translation initiation factor	-3.618	11.49
204305_at	MIPEP	mitochondrial intermediate peptidase	2.543	6.183
204306_s_at	CD151	CD151 molecule (Raph blood group)	1.904	4.123
204308_s_at	TECPR2	tectonin beta-propeller repeat containing 2	-1.325	4.004
204311_at	ATP1B2	ATPase Na+/K+ transporting subunit beta 2	-3.987	6.457
204328_at	TMC6	transmembrane channel like 6	-1.89	3.494
204333_s_at	AGA	aspartylglucosaminidase	1.105	2.618
204336_s_at	RGS19	regulator of G-protein signaling 19	1.107	2.902
204337_at	RGS4	regulator of G-protein signaling 4	-5.266	2.739
204341_at	TRIM16	tripartite motif containing 16	1.264	3.378
204342_at	SLC25A24	solute carrier family 25 member 24	2.496	8.195
204345_at	COL16A1	collagen type XVI alpha 1 chain	-2.272	5.285
204352_at	TRAF5	TNF receptor associated factor 5	1.791	2.557
204357_s_at	LIMK1	LIM domain kinase 1	-1.626	2.416
204360_s_at	NAGLU	N-acetyl-alpha-glucosaminidase	1.431	2.843
204362_at	SKAP2	src kinase associated phosphoprotein 2	-2.915	5.322
204363_at	F3	coagulation factor III, tissue factor	-1.384	1.627
204364_s_at	REEP1	receptor accessory protein 1	-3.516	4.799
204368_at	SLCO2A1	solute carrier organic anion transporter family member 2A1	1.163	2.435
204370_at	CLP1	cleavage and polyadenylation factor I subunit 1	1.531	8.118
204372_s_at	KHSRP	KH-type splicing regulatory protein	1.024	6.623
204375_at	CLSTN3	calsyntenin 3	-2.86	5.847
204378_at	BCAS1	breast carcinoma amplified sequence 1	-3.801	7.72
204379_s_at	FGFR3	fibroblast growth factor receptor 3	-6.151	8.739
204381_at	LRP3	LDL receptor related protein 3	-1.724	6.081
204392_at	CAMK1	calcium/calmodulin dependent protein kinase I	-1.794	3.513
204398_s_at	EML2	echinoderm microtubule associated protein like 2	-1.479	4.681
204402_at	RHBDD3	rhomboid domain containing 3	1.277	3.739
204407_at	TTF2	transcription termination factor 2	2.44	6.572
204408_at	APEX2	apurinic/apyrimidinic endodeoxyribonuclease 2	1.07	3.783
204411_at	KIF21B	kinesin family member 21B	-3.982	5.507
204419_x_at	HBG2///HBG1	hemoglobin subunit gamma 2///hemoglobin subunit gamma 1	-4.742	4.791
204424_s_at	LMO3	LIM domain only 3	-3.65	3.837
204430_s_at	SLC2A5	solute carrier family 2 member 5	-2.003	3.994
204432_at	SOX12	SRY-box 12	1.411	6.204
204434_at	SPATA2	spermatogenesis associated 2	-3.695	9.552
204437_s_at	FOLR1	folate receptor 1	1.577	3.611
204438_at	MRC1	mannose receptor, C type 1	-1.795	2.125
204441_s_at	POLA2	DNA polymerase alpha 2, accessory subunit	1.099	5.596
204442_x_at	LTBP4	latent transforming growth factor beta binding protein 4	2.58	6.481
204444_at	KIF11	kinesin family member 11	6.677	22.825
204447_at	LZTS3	leucine zipper tumor suppressor family member 3	-3.675	15.526
204451_at	FZD1	frizzled class receptor 1	2.886	4.889
204454_at	LDOC1	leucine zipper down-regulated in cancer 1	-1.392	3.221
204457_s_at	GAS1	growth arrest specific 1	4.238	7.391
204464_s_at	EDNRA	endothelin receptor type A	1.75	2.126
204465_s_at	INA	internexin neuronal intermediate filament protein alpha	-4.415	7.671
204466_s_at	SNCA	synuclein alpha	-4.753	7.261
204470_at	CXCL1	C-X-C motif chemokine ligand 1	1.395	1.72
204471_at	GAP43	growth associated protein 43	-4.623	7.265
204472_at	GEM	GTP binding protein overexpressed in skeletal muscle	2.667	2.082
204476_s_at	PC	pyruvate carboxylase	-1.94	5.366
204478_s_at	RABIF	RAB interacting factor	-1.038	2.463
204479_at	OSTF1	osteoclast stimulating factor 1	-3.442	8.427
204484_at	PIK3C2B	phosphatidylinositol-4-phosphate 3-kinase catalytic subunit type 2 beta	-2.181	3.788
204485_s_at	TOM1L1	target of myb1 like 1 membrane trafficking protein	3.755	7.888
204488_at	DOLK	dolichol kinase	1.76	4.396
204497_at	ADCY9	adenylate cyclase 9	-1.265	4.497
204505_s_at	DMTN	dematin actin binding protein	-4.878	15.104
204506_at	PPP3R1	protein phosphatase 3 regulatory subunit B, alpha	-5.32	7.723
204510_at	CDC7	cell division cycle 7	1.21	2.011
204513_s_at	ELMO1	engulfment and cell motility 1	-4.438	11.427
204516_at	ATXN7	ataxin 7	1.232	2.282
204517_at	PPIC	peptidylprolyl isomerase C	3.033	3.895
204519_s_at	PLLP	plasmolipin	-4.224	8.238
204523_at	ZNF140	zinc finger protein 140	1.17	5.664
204526_s_at	TBC1D8	TBC1 domain family member 8	-2.927	5.929
204531_s_at	BRCA1	BRCA1, DNA repair associated	1.733	6.835
204533_at	CXCL10	C-X-C motif chemokine ligand 10	1.594	5.133
204540_at	EEF1A2	eukaryotic translation elongation factor 1 alpha 2	-3.946	5.967
204541_at	SEC14L2	SEC14 like lipid binding 2	-2.155	5.122
204544_at	HPS5	HPS5, biogenesis of lysosomal organelles complex 2 subunit 2	1.068	5.237
204546_at	KIAA0513	KIAA0513	-5.207	16.537
204547_at	RAB40B	RAB40B, member RAS oncogene family	-3.021	9.107
204548_at	STAR	steroidogenic acute regulatory protein	-2.128	7.688
204558_at	RAD54L	RAD54-like (S. cerevisiae)	1.685	6.764
204559_s_at	LSM7	LSM7 homolog, U6 small nuclear RNA and mRNA degradation associated	1.251	4.516
204566_at	PPM1D	protein phosphatase, Mg2+/Mn2+ dependent 1D	1.085	2.177
204570_at	COX7A1	cytochrome c oxidase subunit 7A1	-5.028	11.678
204573_at	CROT	carnitine O-octanoyltransferase	1.173	5.417
204575_s_at	MMP19	matrix metallopeptidase 19	1.107	3.803
204578_at	PPIP5K1	diphosphoinositol pentakisphosphate kinase 1	-2.682	8.236
204580_at	MMP12	matrix metallopeptidase 12	2.315	3.54
204584_at	L1CAM	L1 cell adhesion molecule	-5.999	10.374
204586_at	BSN	bassoon presynaptic cytomatrix protein	-5.999	9.915
204587_at	SLC25A14	solute carrier family 25 member 14	-1.408	6.79
204589_at	NUAK1	NUAK family kinase 1	-2.118	4.123
204591_at	CHL1	cell adhesion molecule L1 like	-5.228	5.859
204592_at	DLG4	discs large MAGUK scaffold protein 4	-3.573	10.333
204602_at	DKK1	dickkopf WNT signaling pathway inhibitor 1	2.635	2.338
204603_at	EXO1	exonuclease 1	1.986	5.403
204604_at	CDK14	cyclin dependent kinase 14	-1.187	4.703
204610_s_at	CCDC85B	coiled-coil domain containing 85B	-1.118	3.445
204611_s_at	PPP2R5B	protein phosphatase 2 regulatory subunit B'beta	-1.167	6.335
204612_at	PKIA	protein kinase (cAMP-dependent, catalytic) inhibitor alpha	-1.924	4.465
204618_s_at	GABPB1	GA binding protein transcription factor beta subunit 1	1.274	4.887
204620_s_at	VCAN	versican	2.323	2.981
204624_at	ATP7B	ATPase copper transporting beta	2.621	4.908
204633_s_at	RPS6KA5	ribosomal protein S6 kinase A5	-2.195	4.184
204639_at	ADA	adenosine deaminase	1.13	1.876
204641_at	NEK2	NIMA related kinase 2	3.253	4.337
204642_at	S1PR1	sphingosine-1-phosphate receptor 1	-1.764	5.081
204646_at	DPYD	dihydropyrimidine dehydrogenase	1.737	1.993
204647_at	HOMER3	homer scaffolding protein 3	1.345	1.579
204649_at	TROAP	trophinin associated protein	3.682	4.341
204654_s_at	TFAP2A	transcription factor AP-2 alpha	3.293	5.459
204661_at	CD52	CD52 molecule	1.36	3.091
204662_at	CCP110	centriolar coiled-coil protein 110	-1.324	3.562
204663_at	ME3	malic enzyme 3	-2.226	6.083
204669_s_at	RNF24	ring finger protein 24	-2.849	4.812
204677_at	CDH5	cadherin 5	-1.125	2.375
204679_at	KCNK1	potassium two pore domain channel subfamily K member 1	-5.165	8.472
204681_s_at	RAPGEF5	Rap guanine nucleotide exchange factor 5	-4.993	14.519
204684_at	NPTX1	neuronal pentraxin 1	-3.857	5.662
204685_s_at	ATP2B2	ATPase plasma membrane Ca2+ transporting 2	-7.102	12.891
204697_s_at	CHGA	chromogranin A	-4.294	6.672
204699_s_at	DIEXF	digestive organ expansion factor homolog (zebrafish)	1.405	3.898
204702_s_at	NFE2L3	nuclear factor, erythroid 2 like 3	4.889	11.783
204709_s_at	KIF23	kinesin family member 23	4.866	16.335
204714_s_at	F5	coagulation factor V	1.852	1.703
204715_at	PANX1	pannexin 1	1.034	3.362
204718_at	EPHB6	EPH receptor B6	-3.721	5.701
204719_at	ABCA8	ATP binding cassette subfamily A member 8	-4.626	7.372
204720_s_at	DNAJC6	DnaJ heat shock protein family (Hsp40) member C6	-7.121	13.359
204723_at	SCN3B	sodium voltage-gated channel beta subunit 3	-7.596	7.495
204726_at	CDH13	cadherin 13	-2.512	3.658
204729_s_at	STX1A	syntaxin 1A	-5.668	10.479
204730_at	RIMS3	regulating synaptic membrane exocytosis 3	-6.049	11.707
204732_s_at	TRIM23	tripartite motif containing 23	-1.046	2.743
204733_at	KLK6	kallikrein related peptidase 6	-3.876	5.241
204735_at	PDE4A	phosphodiesterase 4A	-2.581	5.647
204743_at	TAGLN3	transgelin 3	-4.689	8.38
204744_s_at	IARS	isoleucyl-tRNA synthetase	1.048	6.918
204745_x_at	MT1G	metallothionein 1G	-2.372	5.022
204746_s_at	PICK1	protein interacting with PRKCA 1	-2.031	6.131
204748_at	PTGS2	prostaglandin-endoperoxide synthase 2	-3.508	3.33
204749_at	NAP1L3	nucleosome assembly protein 1 like 3	-3.763	8.038
204753_s_at	HLF	HLF, PAR bZIP transcription factor	-6.773	10.756
204757_s_at	C2CD2L	C2CD2 like	-1.782	8.24
204759_at	RCBTB2	RCC1 and BTB domain containing protein 2	1.271	3.674
204761_at	USP6NL	USP6 N-terminal like	1.933	7.266
204765_at	ARHGEF5	Rho guanine nucleotide exchange factor 5	1.386	2.987
204766_s_at	NUDT1	nudix hydrolase 1	1.414	4.817
204767_s_at	FEN1	flap structure-specific endonuclease 1	1.021	5.448
204774_at	EVI2A	ecotropic viral integration site 2A	-3.866	6.646
204775_at	CHAF1B	chromatin assembly factor 1 subunit B	1.139	4.132
204776_at	THBS4	thrombospondin 4	-2.052	4.363
204777_s_at	MAL	mal, T-cell differentiation protein	-6.857	16.106
204780_s_at	FAS	Fas cell surface death receptor	3.629	3.343
204790_at	SMAD7	SMAD family member 7	-1.799	3.021
204791_at	NR2C1	nuclear receptor subfamily 2 group C member 1	1.248	2.107
204792_s_at	IFT140	intraflagellar transport 140	1.946	6.08
204793_at	GPRASP1	G protein-coupled receptor associated sorting protein 1	-3.193	10.538
204794_at	DUSP2	dual specificity phosphatase 2	-1.223	2.285
204797_s_at	EML1	echinoderm microtubule associated protein like 1	1.604	3.226
204798_at	MYB	MYB proto-oncogene, transcription factor	1.285	4.205
204799_at	ZBED4	zinc finger BED-type containing 4	2.019	4.096
204804_at	TRIM21	tripartite motif containing 21	1.127	4.937
204808_s_at	TMEM5	transmembrane protein 5	1.184	3.168
204811_s_at	CACNA2D2	calcium voltage-gated channel auxiliary subunit alpha2delta 2	-2.206	4.487
204813_at	MAPK10	mitogen-activated protein kinase 10	-3.293	10.003
204818_at	HSD17B2	hydroxysteroid 17-beta dehydrogenase 2	2.175	2.976
204822_at	TTK	TTK protein kinase	5.407	20.773
204823_at	NAV3	neuron navigator 3	-3.377	4.244
204824_at	ENDOG	endonuclease G	-1.232	5.439
204825_at	MELK	maternal embryonic leucine zipper kinase	7.234	25.119
204835_at	POLA1	DNA polymerase alpha 1, catalytic subunit	2.497	5.261
204844_at	ENPEP	glutamyl aminopeptidase	1.698	2.47
204849_at	TCFL5	transcription factor like 5	-1.15	5.184
204859_s_at	APAF1	apoptotic peptidase activating factor 1	1.632	6.877
204866_at	JADE3	jade family PHD finger 3	1.338	2.936
204867_at	GCHFR	GTP cyclohydrolase I feedback regulator	1.856	2.144
204869_at	PCSK2	proprotein convertase subtilisin/kexin type 2	-5.8	13.805
204874_x_at	BAIAP3	BAI1 associated protein 3	-1.66	2.361
204886_at	PLK4	polo like kinase 4	2.729	10.352
204889_s_at	NEURL1	neuralized E3 ubiquitin protein ligase 1	-2.412	4.733
204893_s_at	ZFYVE9	zinc finger FYVE-type containing 9	-1.56	4.539
204912_at	IL10RA	interleukin 10 receptor subunit alpha	-1.265	1.646
204916_at	RAMP1	receptor activity modifying protein 1	-4.604	8.04
204919_at	PRH1-PRR4///PRR4	PRH1-PRR4 readthrough///proline rich 4 (lacrimal)	-1.004	3.081
204920_at	CPS1	carbamoyl-phosphate synthase 1	1.329	1.88
204928_s_at	SLC10A3	solute carrier family 10 member 3	1.374	4.171
204929_s_at	VAMP5	vesicle associated membrane protein 5	-1.247	2.026
204932_at	TNFRSF11B	TNF receptor superfamily member 11b	2.567	4.773
204936_at	MAP4K2	mitogen-activated protein kinase kinase kinase kinase 2	-1.339	3.633
204945_at	PTPRN	protein tyrosine phosphatase, receptor type N	-3.853	7.226
204948_s_at	FST	follistatin	5.108	10.449
204953_at	SNAP91	synaptosome associated protein 91	-4.549	6.225
204962_s_at	SLC35F6///CENPA	solute carrier family 35 member F6///centromere protein A	6.121	25.09
204966_at	ADGRB2	adhesion G protein-coupled receptor B2	-1.179	3.931
204970_s_at	MAFG	MAF bZIP transcription factor G	-2.369	7.963
204972_at	OAS2	2'-5'-oligoadenylate synthetase 2	2.034	2.36
204973_at	GJB1	gap junction protein beta 1	-1.506	2.57
204974_at	RAB3A	RAB3A, member RAS oncogene family	-4.049	7.714
204976_s_at	AMMECR1	Alport syndrome, mental retardation, midface hypoplasia and elliptocytosis chromosomal region gene 1	1.329	3.232
204979_s_at	SH3BGR	SH3 domain binding glutamate rich protein	-1.058	2.086
204981_at	SLC22A18	solute carrier family 22 member 18	1.68	4.869
204984_at	GPC4	glypican 4	5.244	11.066
204985_s_at	TRAPPC6A	trafficking protein particle complex 6A	1.062	3.366
204993_at	GNAZ	G protein subunit alpha z	-3.736	10.117
204994_at	MX2	MX dynamin like GTPase 2	1.026	1.944
204995_at	CDK5R1	cyclin dependent kinase 5 regulatory subunit 1	-2.892	4.53
204998_s_at	ATF5	activating transcription factor 5	1.301	3.842
205000_at	DDX3Y	DEAD-box helicase 3, Y-linked	-2.804	1.876
205003_at	DOCK4	dedicator of cytokinesis 4	-4.179	9.385
205004_at	NKRF	NFKB repressing factor	-1.187	9.246
205006_s_at	NMT2	N-myristoyltransferase 2	-1.05	2.936
205008_s_at	CIB2	calcium and integrin binding family member 2	1.619	4.605
205010_at	GNL3L	G protein nucleolar 3 like	1.276	3.807
205012_s_at	HAGH	hydroxyacylglutathione hydrolase	-1.808	8.38
205019_s_at	VIPR1	vasoactive intestinal peptide receptor 1	-3.852	7.147
205020_s_at	ARL4A	ADP ribosylation factor like GTPase 4A	1.692	2.859
205024_s_at	RAD51	RAD51 recombinase	2.95	12.58
205027_s_at	MAP3K8	mitogen-activated protein kinase kinase kinase 8	1.293	1.906
205046_at	CENPE	centromere protein E	3.28	6.937
205048_s_at	PSPH	phosphoserine phosphatase	2.535	2.375
205050_s_at	MAPK8IP2	mitogen-activated protein kinase 8 interacting protein 2	-3.054	12.158
205051_s_at	KIT	KIT proto-oncogene receptor tyrosine kinase	-4.135	8.842
205052_at	AUH	AU RNA binding methylglutaconyl-CoA hydratase	-1.191	6.356
205053_at	PRIM1	primase (DNA) subunit 1	2.571	5.361
205056_s_at	GPR162	G protein-coupled receptor 162	-2.935	5.532
205059_s_at	IDUA	iduronidase, alpha-L-	1.963	4.478
205063_at	GEMIN2	gem nuclear organelle associated protein 2	1.054	2.4
205067_at	IL1B	interleukin 1 beta	1.306	3.929
205070_at	ING3	inhibitor of growth family member 3	-1.069	2.332
205073_at	CYP2J2	cytochrome P450 family 2 subfamily J member 2	-6.012	16.678
205076_s_at	MTMR11	myotubularin related protein 11	2.357	2.843
205081_at	CRIP1	cysteine rich protein 1	2.447	3.991
205083_at	AOX1	aldehyde oxidase 1	1.377	3.485
205089_at	ZNF7	zinc finger protein 7	1.234	5.86
205090_s_at	NAGPA	N-acetylglucosamine-1-phosphodiester alpha-N-acetylglucosaminidase	-1.273	2.55
205100_at	GFPT2	glutamine-fructose-6-phosphate transaminase 2	-2.214	4.099
205103_at	C1orf61	chromosome 1 open reading frame 61	-4.982	6.719
205104_at	SNPH	syntaphilin	-5.14	12.561
205107_s_at	EFNA4	ephrin A4	1.667	5.316
205109_s_at	LOC101930241///ARHGEF4	rho guanine nucleotide exchange factor 4-like///Rho guanine nucleotide exchange factor 4	-4.302	8.088
205110_s_at	FGF13	fibroblast growth factor 13	-2.678	2.218
205112_at	PLCE1	phospholipase C epsilon 1	1.992	2.121
205113_at	NEFM	neurofilament, medium polypeptide	-7.15	11.375
205114_s_at	CCL3L3///CCL3L1///CCL3	C-C motif chemokine ligand 3 like 3///C-C motif chemokine ligand 3 like 1///C-C motif chemokine ligand 3	2.225	4.121
205117_at	FGF1	fibroblast growth factor 1	-6.15	12.029
205119_s_at	FPR1	formyl peptide receptor 1	-2.044	3.525
205126_at	VRK2	vaccinia related kinase 2	1.562	2.678
205129_at	NPM3	nucleophosmin/nucleoplasmin 3	2.318	5.182
205130_at	MOK	MOK protein kinase	1.133	1.953
205132_at	ACTC1	actin, alpha, cardiac muscle 1	1.07	3.141
205139_s_at	UST	uronyl 2-sulfotransferase	-2.549	4.097
205140_at	FPGT	fucose-1-phosphate guanylyltransferase	2.251	8.007
205141_at	ANG	angiogenin	1.551	5.842
205142_x_at	ABCD1	ATP binding cassette subfamily D member 1	1.429	4
205143_at	NCAN	neurocan	-3.197	3.695
205145_s_at	MYL5	myosin light chain 5	1.466	3.252
205150_s_at	TRIL	TLR4 interactor with leucine rich repeats	-5.356	10.555
205152_at	SLC6A1	solute carrier family 6 member 1	-5.195	11.913
205155_s_at	SPTBN2	spectrin beta, non-erythrocytic 2	-2.9	5.733
205156_s_at	ASIC1	acid sensing ion channel subunit 1	-1.349	2.132
205160_at	PEX11A	peroxisomal biogenesis factor 11 alpha	1.61	3.845
205164_at	GCAT	glycine C-acetyltransferase	-2.541	6.946
205167_s_at	CDC25C	cell division cycle 25C	2.33	7.905
205171_at	PTPN4	protein tyrosine phosphatase, non-receptor type 4	-1.691	6.994
205173_x_at	CD58	CD58 molecule	1.841	3.51
205176_s_at	ITGB3BP	integrin subunit beta 3 binding protein	1.33	5.206
205181_at	ZSCAN9	zinc finger and SCAN domain containing 9	1.069	2.207
205182_s_at	ZNF324	zinc finger protein 324	-1.58	4.347
205191_at	RP2	retinitis pigmentosa 2 (X-linked recessive)	2.177	4.864
205198_s_at	ATP7A	ATPase copper transporting alpha	2.111	7.012
205200_at	EXOSC7///CLEC3B	exosome component 7///C-type lectin domain family 3 member B	-3.122	4.66
205202_at	PCMT1	protein-L-isoaspartate (D-aspartate) O-methyltransferase	-1.291	7.867
205204_at	NMB	neuromedin B	2.834	2.513
205208_at	ALDH1L1	aldehyde dehydrogenase 1 family member L1	-3.086	3.787
205223_at	DEPDC5	DEP domain containing 5	-1.246	2.749
205226_at	PDGFRL	platelet derived growth factor receptor like	2.395	2.689
205230_at	RPH3A	rabphilin 3A	-6.393	8.806
205231_s_at	EPM2A	epilepsy, progressive myoclonus type 2A, Lafora disease (laforin)	-1.761	5.835
205235_s_at	KIF20B	kinesin family member 20B	1.746	6.799
205239_at	AREG	amphiregulin	-1.423	2.813
205241_at	SCO2	SCO2 cytochrome c oxidase assembly protein	-1.16	1.777
205245_at	PARD6A	par-6 family cell polarity regulator alpha	-1.881	6.28
205251_at	PER2	period circadian clock 2	-1.89	5.576
205256_at	ZBTB39	zinc finger and BTB domain containing 39	1.72	7.729
205257_s_at	AMPH	amphiphysin	-4.253	7.774
205259_at	NR3C2	nuclear receptor subfamily 3 group C member 2	-4.629	11.292
205265_s_at	LOC100996693///SPEG	CAVP-target protein-like///SPEG complex locus	-3.203	7.114
205266_at	LIF	leukemia inhibitory factor	1.708	3.688
205278_at	GAD1	glutamate decarboxylase 1	-5.896	7.357
205280_at	GLRB	glycine receptor beta	-3.114	4.77
205284_at	URB2	URB2 ribosome biogenesis 2 homolog (S. cerevisiae)	1.131	7.945
205286_at	TFAP2C	transcription factor AP-2 gamma	2.786	5.932
205288_at	CDC14A	cell division cycle 14A	1.05	4.81
205291_at	IL2RB	interleukin 2 receptor subunit beta	1.372	3.499
205294_at	BAIAP2	BAI1 associated protein 2	-2.898	5.246
205295_at	CKMT2	creatine kinase, mitochondrial 2	-1.325	3.41
205296_at	RBL1	RB transcriptional corepressor like 1	2.337	6.761
205298_s_at	BTN2A2	butyrophilin subfamily 2 member A2	2.438	6.932
205303_at	KCNJ8	potassium voltage-gated channel subfamily J member 8	1.677	3.645
205310_at	FBXO46	F-box protein 46	1.367	7.373
205316_at	SLC15A2	solute carrier family 15 member 2	-3.665	6.478
205320_at	APC2	APC2, WNT signaling pathway regulator	-1.461	1.652
205325_at	PHYHIP	phytanoyl-CoA 2-hydroxylase interacting protein	-8.303	19.714
205328_at	CLDN10	claudin 10	-3.189	3.802
205334_at	S100A1	S100 calcium binding protein A1	-2.699	3.28
205336_at	PVALB	parvalbumin	-7.454	16.706
205339_at	STIL	SCL/TAL1 interrupting locus	3.809	12.492
205345_at	BARD1	BRCA1 associated RING domain 1	2.424	6.032
205347_s_at	TMSB15B///TMSB15A	thymosin beta 15B///thymosin beta 15a	7.349	11.219
205348_s_at	DYNC1I1	dynein cytoplasmic 1 intermediate chain 1	-6.422	19.893
205352_at	SERPINI1	serpin family I member 1	-2.808	3.713
205358_at	GRIA2	glutamate ionotropic receptor AMPA type subunit 2	-5.228	5.401
205359_at	AKAP6	A-kinase anchoring protein 6	-4.613	9.531
205361_s_at	PFDN4	prefoldin subunit 4	1.032	5.06
205363_at	BBOX1	gamma-butyrobetaine hydroxylase 1	-5.119	8.547
205368_at	FAM131B	family with sequence similarity 131 member B	-5.357	11.855
205373_at	CTNNA2	catenin alpha 2	-5.059	6.182
205378_s_at	ACHE	acetylcholinesterase (Cartwright blood group)	-2.156	3.228
205381_at	LRRC17	leucine rich repeat containing 17	3.473	4.19
205384_at	FXYD1	FXYD domain containing ion transport regulator 1	-7.69	7.613
205394_at	CHEK1	checkpoint kinase 1	5.048	20.219
205395_s_at	MRE11A	MRE11 homolog A, double strand break repair nuclease	2.512	11.081
205413_at	MPPED2	metallophosphoesterase domain containing 2	-4.689	5.631
205414_s_at	ARHGAP44	Rho GTPase activating protein 44	-4.495	13.537
205427_at	ZNF354A	zinc finger protein 354A	1.551	7.31
205428_s_at	CALB2	calbindin 2	-2.114	2.909
205439_at	GSTT2	glutathione S-transferase theta 2 (gene/pseudogene)	-2.749	3.297
205441_at	OCEL1	occludin/ELL domain containing 1	-1.695	4.444
205442_at	MFAP3L	microfibrillar associated protein 3 like	-2.446	5.675
205443_at	SNAPC1	small nuclear RNA activating complex polypeptide 1	1.771	5.415
205449_at	SAC3D1	SAC3 domain containing 1	1.162	6.473
205451_at	FOXO4	forkhead box O4	-1.023	2.91
205452_at	PIGB	phosphatidylinositol glycan anchor biosynthesis class B	1.424	5.881
205454_at	HPCA	hippocalcin	-4.527	6.98
205463_s_at	PDGFA	platelet derived growth factor subunit A	-3.284	6.927
205464_at	SCNN1B	sodium channel epithelial 1 beta subunit	1.007	2.366
205466_s_at	HS3ST1	heparan sulfate-glucosamine 3-sulfotransferase 1	-3.566	6.001
205475_at	SCRG1	stimulator of chondrogenesis 1	-5.327	7.12
205478_at	PPP1R1A	protein phosphatase 1 regulatory inhibitor subunit 1A	-3.144	6.276
205479_s_at	PLAU	plasminogen activator, urokinase	5.857	9.46
205481_at	ADORA1	adenosine A1 receptor	-4.477	6.667
205485_at	RYR1	ryanodine receptor 1	-3.087	5.875
205486_at	TESK2	testis-specific kinase 2	-1.495	3.871
205489_at	CRYM	crystallin mu	-4.827	4.098
205493_s_at	DPYSL4	dihydropyrimidinase like 4	-1.228	2.967
205496_at	KIAA0408	KIAA0408	-3.02	4.61
205499_at	SRPX2	sushi repeat containing protein, X-linked 2	1.583	5.1
205500_at	C5	complement component 5	2.014	5.093
205501_at	PDE10A	phosphodiesterase 10A	-2.284	3.093
205508_at	SCN1B	sodium voltage-gated channel beta subunit 1	-4.523	14.141
205516_x_at	CIZ1	CDKN1A interacting zinc finger protein 1	1.627	5.712
205526_s_at	KATNA1	katanin catalytic subunit A1	1.875	5.531
205527_s_at	GEMIN4	gem nuclear organelle associated protein 4	2.43	6.763
205542_at	STEAP1	six transmembrane epithelial antigen of the prostate 1	3.279	5.614
205549_at	PCP4	Purkinje cell protein 4	-2.438	2.476
205551_at	SV2B	synaptic vesicle glycoprotein 2B	-9.048	11.138
205552_s_at	OAS1	2'-5'-oligoadenylate synthetase 1	1.447	3.159
205561_at	KCTD17	potassium channel tetramerization domain containing 17	-1.643	4.918
205562_at	RPP38	ribonuclease P/MRP subunit p38	1.904	7.265
205565_s_at	FXN	frataxin	1.765	6.084
205567_at	CHST1	carbohydrate sulfotransferase 1	-3.411	4.642
205569_at	LAMP3	lysosomal associated membrane protein 3	1.178	2.818
205577_at	PYGM	phosphorylase, glycogen, muscle	-5.535	1.62
205578_at	ROR2	receptor tyrosine kinase like orphan receptor 2	1.318	2.841
205590_at	RASGRP1	RAS guanyl releasing protein 1	-4.693	5.208
205612_at	MMRN1	multimerin 1	1.365	3.573
205616_at	GALNT8///KCNA6	polypeptide N-acetylgalactosaminyltransferase 8///potassium voltage-gated channel subfamily A member 6	-2.905	6.367
205618_at	PRRG1	proline rich and Gla domain 1	-1.944	4.393
205619_s_at	MEOX1	mesenchyme homeobox 1	3.556	5.963
205622_at	SMPD2	sphingomyelin phosphodiesterase 2	1.033	6.131
205626_s_at	CALB1	calbindin 1	-3.922	4.967
205628_at	PRIM2	primase (DNA) subunit 2	1.963	7.508
205632_s_at	PIP5K1B	phosphatidylinositol-4-phosphate 5-kinase type 1 beta	-4.396	6.696
205637_s_at	SH3GL3	SH3 domain containing GRB2 like 3, endophilin A3	-6.495	13.925
205638_at	ADGRB3	adhesion G protein-coupled receptor B3	-2.054	2.199
205642_at	CNTRL	centriolin	2.513	9.471
205644_s_at	SNRPG	small nuclear ribonucleoprotein polypeptide G	1.746	11.621
205647_at	RAD52	RAD52 homolog, DNA repair protein	1.085	2.408
205651_x_at	RAPGEF4	Rap guanine nucleotide exchange factor 4	-4.399	6.29
205664_at	KIN	Kin17 DNA and RNA binding protein	1.465	7.429
205667_at	WRN	Werner syndrome RecQ like helicase	2.039	8.201
205677_s_at	DLEU1	deleted in lymphocytic leukemia 1	1.23	2.327
205678_at	AP3B2	adaptor related protein complex 3 beta 2 subunit	-5.565	14.035
205691_at	SYNGR3	synaptogyrin 3	-6.111	13.179
205695_at	SDS	serine dehydratase	-2.007	4.009
205697_at	SCGN	secretagogin, EF-hand calcium binding protein	-1.334	1.761
205698_s_at	MAP2K6	mitogen-activated protein kinase kinase 6	3.082	4.769
205708_s_at	TRPM2	transient receptor potential cation channel subfamily M member 2	-2.543	8.877
205709_s_at	CDS1	CDP-diacylglycerol synthase 1	-3.901	6.988
205714_s_at	ZMYND10	zinc finger MYND-type containing 10	1.662	2.429
205719_s_at	LOC101929036///PAH	uncharacterized LOC101929036///phenylalanine hydroxylase	-3.909	10.601
205721_at	GFRA2	GDNF family receptor alpha 2	-1.886	5.124
205728_at	TENM1	teneurin transmembrane protein 1	-3.454	5.188
205730_s_at	ABLIM3	actin binding LIM protein family member 3	-4.496	12.551
205733_at	BLM	Bloom syndrome RecQ like helicase	1.574	2.481
205736_at	PGAM2	phosphoglycerate mutase 2	-1.565	2.462
205737_at	KCNQ2	potassium voltage-gated channel subfamily Q member 2	-7.448	12.045
205739_x_at	ZNF107	zinc finger protein 107	1.166	2.663
205742_at	TNNI3	troponin I3, cardiac type	1.217	1.911
205744_at	DOC2A	double C2 domain alpha	-2.89	7.091
205748_s_at	RNF126	ring finger protein 126	1.205	3.562
205750_at	BPHL	biphenyl hydrolase like	1.32	5.654
205751_at	SH3GL2	SH3 domain containing GRB2 like 2, endophilin A1	-8.256	15
205752_s_at	GSTM5	glutathione S-transferase mu 5	-1.485	5.202
205756_s_at	F8	coagulation factor VIII	-1.743	4.715
205761_s_at	DUS4L	dihydrouridine synthase 4 like	1.459	3.885
205766_at	TCAP	titin-cap	-1.699	5.395
205773_at	CPEB3	cytoplasmic polyadenylation element binding protein 3	-1.858	2.537
205775_at	FAM50B	family with sequence similarity 50 member B	-1.172	7.029
205806_at	ROM1	retinal outer segment membrane protein 1	-1.142	1.879
205807_s_at	TUFT1	tuftelin 1	-1.193	1.768
205811_at	POLG2	DNA polymerase gamma 2, accessory subunit	2.043	6.831
205812_s_at	TMED9	transmembrane p24 trafficking protein 9	1.182	5.923
205814_at	GRM3	glutamate metabotropic receptor 3	-4.186	6.333
205818_at	BRINP1	BMP/retinoic acid inducible neural specific 1	-4.076	4.859
205825_at	PCSK1	proprotein convertase subtilisin/kexin type 1	-4.271	3.708
205826_at	MYOM2	myomesin 2	-1.143	2.428
205830_at	CLGN	calmegin	1.658	1.954
205839_s_at	TSPOAP1	TSPO associated protein 1	-3.149	6.35
205851_at	NME6	NME/NM23 nucleoside diphosphate kinase 6	1.526	4.596
205852_at	CDK5R2	cyclin dependent kinase 5 regulatory subunit 2	-4.713	6.79
205854_at	TULP3	tubby like protein 3	1.53	3.45
205856_at	SLC14A1	solute carrier family 14 member 1 (Kidd blood group)	-4.268	6.887
205874_at	ITPKA	inositol-trisphosphate 3-kinase A	-5.42	8.69
205878_at	POU6F1	POU class 6 homeobox 1	-2.774	9.878
205883_at	ZBTB16	zinc finger and BTB domain containing 16	-3.708	7.616
205888_s_at	JAKMIP2	janus kinase and microtubule interacting protein 2	-2.286	6.354
205898_at	CX3CR1	C-X3-C motif chemokine receptor 1	-3.511	4.574
205902_at	KCNN3	potassium calcium-activated channel subfamily N member 3	-3.758	7.051
205906_at	FOXJ1	forkhead box J1	3.124	5.249
205909_at	POLE2	DNA polymerase epsilon 2, accessory subunit	3.993	11.097
205911_at	PTH1R	parathyroid hormone 1 receptor	-1.553	4.233
205918_at	SLC4A3	solute carrier family 4 member 3	-2.941	5.489
205923_at	RELN	reelin	-2.911	3.928
205934_at	PLCL1	phospholipase C like 1	-2.997	6.946
205937_at	CGREF1	cell growth regulator with EF-hand domain 1	-1.867	4.629
205944_s_at	CLTCL1	clathrin heavy chain like 1	-1.551	3.426
205946_at	VIPR2	vasoactive intestinal peptide receptor 2	-1.238	2.358
205948_at	PTPRT	protein tyrosine phosphatase, receptor type T	-4.149	4.643
205950_s_at	CA1	carbonic anhydrase 1	-1.019	3.565
205952_at	KCNK3	potassium two pore domain channel subfamily K member 3	-5.411	7.658
205953_at	LRIG2	leucine rich repeats and immunoglobulin like domains 2	2.822	11.808
205957_at	PLXNB3	plexin B3	-1.719	2.435
205964_at	ZNF426	zinc finger protein 426	1.054	4.067
205967_at	HIST2H4B///HIST4H4///HIST2H4A///HIST1H4L///HIST1H4E///HIST1H4B///HIST1H4H///HIST1H4C///HIST1H4J///HIST1H4K///HIST1H4F///HIST1H4D///HIST1H4A///HIST1H4I	histone cluster 2, H4b///histone cluster 4, H4///histone cluster 2, H4a///histone cluster 1, H4l///histone cluster 1, H4e///histone cluster 1, H4b///histone cluster 1, H4h///histone cluster 1, H4c///histone cluster 1, H4j///histone cluster 1, H4k///histone cluster 1, H4f///histone cluster 1, H4d///histone cluster 1, H4a///histone cluster 1, H4i	-1.453	2.932
205970_at	MT3	metallothionein 3	-4.03	7.677
205986_at	AATK	apoptosis associated tyrosine kinase	-3.222	8.78
205990_s_at	WNT5A	Wnt family member 5A	3.596	3.479
206001_at	NPY	neuropeptide Y	-2.927	1.679
206003_at	CEP135	centrosomal protein 135	2.571	9.671
206006_s_at	CEP162	centrosomal protein 162	2.082	6.61
206014_at	ACTL6B	actin like 6B	-5.585	7.686
206017_at	KIAA0319	KIAA0319	-4.485	14.955
206022_at	NDP	NDP, norrin cystine knot growth factor	-4.848	7.216
206024_at	HPD	4-hydroxyphenylpyruvate dioxygenase	1.417	3.602
206030_at	ASPA	aspartoacylase	-5.498	13.212
206031_s_at	USP5	ubiquitin specific peptidase 5	1.011	1.96
206032_at	DSC3	desmocollin 3	1.244	2.423
206034_at	SERPINB8	serpin family B member 8	1.114	4.914
206039_at	RAB33A	RAB33A, member RAS oncogene family	-3.053	4.309
206068_s_at	ACADL	acyl-CoA dehydrogenase, long chain	2.332	4.474
206074_s_at	HMGA1	high mobility group AT-hook 1	1.207	2.531
206080_at	PLCH2	phospholipase C eta 2	-3.121	2.95
206081_at	SLC24A1	solute carrier family 24 member 1	2.162	7.024
206083_at	ADGRB1	adhesion G protein-coupled receptor B1	-1.31	6.057
206087_x_at	HFE	hemochromatosis	1.267	4.024
206089_at	NELL1	neural EGFL like 1	-4.8	6.542
206091_at	MATN3	matrilin 3	1.425	1.926
206093_x_at	TNXB///TNXA	tenascin XB///tenascin XA (pseudogene)	-1.303	2.415
206095_s_at	SRSF10	serine and arginine rich splicing factor 10	1.394	6.864
206098_at	ZBTB6	zinc finger and BTB domain containing 6	1.309	1.988
206102_at	GINS1	GINS complex subunit 1	2.283	8.995
206106_at	MAPK12	mitogen-activated protein kinase 12	-1.991	3.897
206107_at	RGS11	regulator of G-protein signaling 11	-2.313	3.105
206109_at	FUT1	fucosyltransferase 1 (H blood group)	-1.572	3.403
206110_at	HIST1H3F///HIST1H3B///HIST1H3H///HIST1H3J///HIST1H3G///HIST1H3I///HIST1H3E///HIST1H3C///HIST1H3D///HIST1H3A	histone cluster 1, H3f///histone cluster 1, H3b///histone cluster 1, H3h///histone cluster 1, H3j///histone cluster 1, H3g///histone cluster 1, H3i///histone cluster 1, H3e///histone cluster 1, H3c///histone cluster 1, H3d///histone cluster 1, H3a	2.524	7.198
206115_at	EGR3	early growth response 3	-2.789	2.006
206118_at	STAT4	signal transducer and activator of transcription 4	-3.58	2.703
206134_at	ADAMDEC1	ADAM like decysin 1	2.536	5.745
206135_at	ST18	ST18, C2H2C-type zinc finger	-3.094	1.932
206141_at	MOCS3	molybdenum cofactor synthesis 3	1.205	3.144
206142_at	ZNF135	zinc finger protein 135	1.396	3.511
206152_at	AGAP2	ArfGAP with GTPase domain, ankyrin repeat and PH domain 2	-3.611	7.456
206157_at	PTX3	pentraxin 3	4.055	5.365
206159_at	GDF10	growth differentiation factor 10	-3.522	4.084
206162_x_at	SYT5	synaptotagmin 5	-2.562	3.399
206167_s_at	ARHGAP6	Rho GTPase activating protein 6	-1.56	1.88
206170_at	ADRB2	adrenoceptor beta 2	-1.15	5.332
206176_at	BMP6	bone morphogenetic protein 6	2.988	4.925
206178_at	PLA2G5	phospholipase A2 group V	-1.734	3.348
206182_at	ZNF134	zinc finger protein 134	1.899	4.882
206190_at	GPR17	G protein-coupled receptor 17	-2.235	4.098
206191_at	ENTPD3	ectonucleoside triphosphate diphosphohydrolase 3	-4.429	9.058
206194_at	HOXC4	homeobox C4	1.97	2.81
206196_s_at	RUNDC3A	RUN domain containing 3A	-8.353	15.349
206230_at	LHX1	LIM homeobox 1	-1.14	2.04
206231_at	KCNN1	potassium calcium-activated channel subfamily N member 1	-2.343	3.847
206240_s_at	ZNF136	zinc finger protein 136	1.452	4.085
206245_s_at	IVNS1ABP	influenza virus NS1A binding protein	1.91	5.901
206258_at	ST8SIA5	ST8 alpha-N-acetyl-neuraminide alpha-2,8-sialyltransferase 5	-2.25	2.571
206263_at	FMO4	flavin containing monooxygenase 4	2.277	2.991
206267_s_at	MATK	megakaryocyte-associated tyrosine kinase	-3.155	6.792
206274_s_at	CROCC	ciliary rootlet coiled-coil, rootletin	1.337	3.562
206280_at	CDH18	cadherin 18	-6.777	8.687
206290_s_at	RGS7	regulator of G-protein signaling 7	-7.459	14.112
206298_at	ARHGAP22	Rho GTPase activating protein 22	-1.76	1.646
206299_at	FAM155B	family with sequence similarity 155 member B	-2.471	6.019
206306_at	RYR3	ryanodine receptor 3	-3.06	3.921
206309_at	LECT1	leukocyte cell derived chemotaxin 1	1.21	2.19
206314_at	ZKSCAN7	zinc finger with KRAB and SCAN domains 7	2.903	7.132
206316_s_at	KNTC1	kinetochore associated 1	3.686	14.142
206326_at	GRP	gastrin releasing peptide	-1.564	3.125
206329_at	EXTL1	exostosin like glycosyltransferase 1	-1.492	5.168
206331_at	CALCRL	calcitonin receptor like receptor	3.711	6.657
206333_at	MSI1	musashi RNA binding protein 1	2.184	6.21
206336_at	CXCL6	C-X-C motif chemokine ligand 6	2.989	3.677
206339_at	CARTPT	CART prepropeptide	-2.898	6.462
206349_at	LGI1	leucine rich glioma inactivated 1	-5.24	8.838
206351_s_at	PEX10	peroxisomal biogenesis factor 10	1.432	3.756
206362_x_at	MAP3K10	mitogen-activated protein kinase kinase kinase 10	-1.688	3.954
206364_at	KIF14	kinesin family member 14	5.217	22.326
206373_at	ZIC1	Zic family member 1	2.376	2.55
206374_at	LOC101927562///DUSP8	uncharacterized LOC101927562///dual specificity phosphatase 8	-3.663	8.41
206375_s_at	HSPB3	heat shock protein family B (small) member 3	-2.54	5.302
206376_at	SLC6A15	solute carrier family 6 member 15	-3.809	5.662
206382_s_at	BDNF	brain derived neurotrophic factor	-2.503	2.554
206384_at	CACNG3	calcium voltage-gated channel auxiliary subunit gamma 3	-6.248	10.975
206385_s_at	ANK3	ankyrin 3, node of Ranvier (ankyrin G)	-4.513	9.765
206394_at	MYBPC2	myosin binding protein C, fast type	1.578	2.286
206395_at	DGKG	diacylglycerol kinase gamma	-2.169	2.658
206403_at	ZNF536	zinc finger protein 536	-2.242	2.487
206408_at	LRRTM2	leucine rich repeat transmembrane neuronal 2	-3.543	6.063
206436_at	MPPED1	metallophosphoesterase domain containing 1	-3.123	4.607
206445_s_at	PRMT1	protein arginine methyltransferase 1	1.346	7.81
206448_at	ZNF365	zinc finger protein 365	-6.991	14.232
206453_s_at	NDRG2	NDRG family member 2	-4.283	11.696
206461_x_at	MT1H	metallothionein 1H	-2.128	4.824
206465_at	ACSBG1	acyl-CoA synthetase bubblegum family member 1	-5.679	8.319
206467_x_at	RTEL1-TNFRSF6B///TNFRSF6B	RTEL1-TNFRSF6B readthrough (NMD candidate)///TNF receptor superfamily member 6b	-1.301	4.454
206481_s_at	LDB2	LIM domain binding 2	-4.139	3.442
206498_at	OCA2	OCA2 melanosomal transmembrane protein	2.836	1.942
206499_s_at	RCC1	regulator of chromosome condensation 1	3.03	10.519
206506_s_at	SUPT3H	SPT3 homolog, SAGA and STAGA complex component	1.307	4.583
206512_at	ZRSR1///SRP19	zinc finger CCCH-type, RNA binding motif and serine/arginine rich 1///signal recognition particle 19	-1.228	2.27
206516_at	MIR4321///AMH	microRNA 4321///anti-Mullerian hormone	1.98	2.453
206524_at	T	T brachyury transcription factor	2.037	3.443
206526_at	RIBC2	RIB43A domain with coiled-coils 2	1.15	4.078
206528_at	TRPC6	transient receptor potential cation channel subfamily C member 6	1.016	2.02
206529_x_at	SLC26A4	solute carrier family 26 member 4	-1.325	2.615
206533_at	CHRNA5	cholinergic receptor nicotinic alpha 5 subunit	1.882	5.28
206539_s_at	CYP4F12	cytochrome P450 family 4 subfamily F member 12	2.416	3.244
206540_at	GLB1L	galactosidase beta 1 like	1.988	6.039
206547_s_at	PPEF1	protein phosphatase with EF-hand domain 1	-2.894	4.688
206550_s_at	NUP155	nucleoporin 155	1.293	6.453
206552_s_at	TAC1	tachykinin precursor 1	-5.229	5.807
206558_at	SIM2	single-minded family bHLH transcription factor 2	4.161	5.254
206560_s_at	MIA	melanoma inhibitory activity	1.938	1.968
206572_x_at	ZNF85	zinc finger protein 85	1.182	4.619
206574_s_at	PTP4A3	protein tyrosine phosphatase type IVA, member 3	3.021	8.14
206577_at	VIP	vasoactive intestinal peptide	-3.144	3.614
206587_at	CCT6B	chaperonin containing TCP1 subunit 6B	1.387	7.766
206613_s_at	TAF1A	TATA-box binding protein associated factor, RNA polymerase I subunit A	2.699	7.082
206614_at	GDF5	growth differentiation factor 5	2.528	4.149
206625_at	PRPH2	peripherin 2	-2.096	7.771
206631_at	PTGER2	prostaglandin E receptor 2	1.045	2.897
206632_s_at	APOBEC3B	apolipoprotein B mRNA editing enzyme catalytic subunit 3B	2.267	5.291
206634_at	SIX3	SIX homeobox 3	3.171	3.051
206646_at	GLI1	GLI family zinc finger 1	2.078	3.411
206655_s_at	SEPT5-GP1BB///SEPT5///GP1BB	SEPT5-GP1BB readthrough///septin 5///glycoprotein Ib platelet beta subunit	-1.94	4.346
206658_at	UPK3B	uroplakin 3B	1.544	3.005
206662_at	GLRX	glutaredoxin	-2.325	9.407
206690_at	ASIC2	acid sensing ion channel subunit 2	-4.949	17.776
206695_x_at	ZNF43	zinc finger protein 43	2.189	6.54
206698_at	XK	X-linked Kx blood group	-4.526	7.462
206700_s_at	KDM5D	lysine demethylase 5D	-2.785	2.523
206711_at	TMEM257	transmembrane protein 257	-5.087	12.81
206718_at	LMO1	LIM domain only 1	1.805	1.887
206723_s_at	LPAR2	lysophosphatidic acid receptor 2	3.431	8.471
206732_at	SLITRK3	SLIT and NTRK like family member 3	-3.264	3.002
206734_at	JRKL	JRK-like	1.172	3.456
206737_at	WNT11	Wnt family member 11	2.1	5.086
206758_at	EDN2	endothelin 2	1.326	2.729
206775_at	CUBN	cubilin	1.178	2.017
206780_at	GAD2	glutamate decarboxylase 2	-5.224	13.225
206785_s_at	KLRC2///KLRC1	killer cell lectin like receptor C2///killer cell lectin like receptor C1	-1.667	4.101
206803_at	PDYN	prodynorphin	-2.04	4.758
206805_at	SEMA3A	semaphorin 3A	3.263	5.008
206806_at	DGKI	diacylglycerol kinase iota	-1.634	1.721
206811_at	ADCY8	adenylate cyclase 8	-2.935	5.514
206826_at	PMP2	peripheral myelin protein 2	-5.821	7.374
206833_s_at	LOC101927144///ACYP2	uncharacterized LOC101927144///acylphosphatase 2	-2.218	13.273
206850_at	RASL10A	RAS like family 10 member A	-3.165	2.701
206854_s_at	MAP3K7	mitogen-activated protein kinase kinase kinase 7	1.562	9.562
206855_s_at	HYAL2	hyaluronoglucosaminidase 2	1.589	5.475
206857_s_at	FKBP1B	FK506 binding protein 1B	-1.664	6.23
206858_s_at	HOXC6	homeobox C6	3.146	3.753
206868_at	STARD8	StAR related lipid transfer domain containing 8	-1.128	2.731
206878_at	DAO	D-amino acid oxidase	-2.265	2.792
206888_s_at	ARHGDIG	Rho GDP dissociation inhibitor gamma	-6.134	15.631
206898_at	CDH19	cadherin 19	-2.171	2.388
206899_at	NTSR2	neurotensin receptor 2	-5.414	17.453
206906_at	ICAM5	intercellular adhesion molecule 5	-2.343	5.992
206915_at	NKX2-2	NK2 homeobox 2	-4.799	8.321
206928_at	ZNF124	zinc finger protein 124	2.11	4.994
206942_s_at	PMCH	pro-melanin concentrating hormone	2.722	2.422
206949_s_at	RUSC1	RUN and SH3 domain containing 1	-1.126	3.78
206977_at	PTH	parathyroid hormone	1.982	2.689
206984_s_at	RIT2	Ras like without CAAX 2	-6.163	10.033
206989_s_at	SCAF11	SR-related CTD associated factor 11	2.093	6.592
206991_s_at	CCR5	C-C motif chemokine receptor 5 (gene/pseudogene)	1.458	4.881
206999_at	IL12RB2	interleukin 12 receptor subunit beta 2	-1.502	4.727
207002_s_at	PLAGL1	PLAG1 like zinc finger 1	3.528	4.623
207010_at	GABRB1	gamma-aminobutyric acid type A receptor beta1 subunit	-7.122	11.005
207011_s_at	PTK7	protein tyrosine kinase 7 (inactive)	2.59	5.693
207014_at	GABRA2	gamma-aminobutyric acid type A receptor alpha2 subunit	-5.425	8.271
207025_at	GJC2	gap junction protein gamma 2	-1.448	4.254
207030_s_at	CSRP2	cysteine and glycine rich protein 2	1.028	1.793
207035_at	SLC30A3	solute carrier family 30 member 3	-3.841	6.167
207055_at	GPR37L1	G protein-coupled receptor 37 like 1	-1.549	1.731
207057_at	SLC16A7	solute carrier family 16 member 7	-3.578	9.818
207063_at	TTTY14	testis-specific transcript, Y-linked 14 (non-protein coding)	-1.99	2.311
207065_at	KRT75	keratin 75	1.4	2.138
207068_at	ZFP37	ZFP37 zinc finger protein	1.801	3.072
207070_at	RGR	retinal G protein coupled receptor	-2.537	2.551
207081_s_at	PI4KA	phosphatidylinositol 4-kinase alpha	-3.072	8.808
207090_x_at	ZFP30	ZFP30 zinc finger protein	1.078	3.93
207091_at	P2RX7	purinergic receptor P2X 7	-2.187	2.4
207093_s_at	LOC101927057///OMG	uncharacterized LOC101927057///oligodendrocyte myelin glycoprotein	-7.908	18.852
207103_at	KCND2	potassium voltage-gated channel subfamily D member 2	-4.08	5.036
207110_at	LOC100996843///KCNJ18///KCNJ12	ATP-sensitive inward rectifier potassium channel 12-like///potassium voltage-gated channel subfamily J member 18///potassium voltage-gated channel subfamily J member 12	-2.212	1.666
207135_at	HTR2A	5-hydroxytryptamine receptor 2A	-4.46	4.177
207149_at	CDH12	cadherin 12	-4.011	2.733
207150_at	SLC18A3	solute carrier family 18 member A3	1.499	2.982
207156_at	HIST1H2AH///HIST1H2AG///HIST1H2AM///HIST1H2AL///HIST1H2AK///HIST1H2AI	histone cluster 1, H2ah///histone cluster 1, H2ag///histone cluster 1, H2am///histone cluster 1, H2al///histone cluster 1, H2ak///histone cluster 1, H2ai	1.983	4.8
207157_s_at	GNG5	G protein subunit gamma 5	2.068	11.754
207165_at	HMMR	hyaluronan mediated motility receptor	5.435	14.117
207169_x_at	MIR4640///DDR1	microRNA 4640///discoidin domain receptor tyrosine kinase 1	1.473	4.631
207174_at	GPC5	glypican 5	-3.8	4.171
207181_s_at	CASP7	caspase 7	1.605	3.592
207183_at	GPR19	G protein-coupled receptor 19	-2.238	10.355
207195_at	CNTN6	contactin 6	-1.654	2.247
207196_s_at	TNIP1	TNFAIP3 interacting protein 1	1.269	5.035
207227_x_at	RFPL2	ret finger protein like 2	-2.212	6.512
207236_at	ZNF345	zinc finger protein 345	1.247	5.703
207243_s_at	CALM3///CALM2///CALM1	calmodulin 3///calmodulin 2///calmodulin 1	-1.108	13.685
207267_s_at	RIPPLY3	ripply transcriptional repressor 3	3.395	8.753
207299_s_at	GRM1	glutamate metabotropic receptor 1	-5.577	6.428
207302_at	SGCG	sarcoglycan gamma	2.887	2.36
207338_s_at	ZNF200	zinc finger protein 200	1.676	4.719
207368_at	HTR1D	5-hydroxytryptamine receptor 1D	1.174	1.944
207383_s_at	RHBDL1	rhomboid like 1	-2.466	2.462
207396_s_at	ALG3	ALG3, alpha-1,3- mannosyltransferase	1.36	4.337
207405_s_at	RAD17	RAD17 checkpoint clamp loader component	1.163	5.399
207468_s_at	SFRP5	secreted frizzled related protein 5	1.197	1.607
207511_s_at	CNPPD1	cyclin Pas1/PHO80 domain containing 1	2.082	6.071
207535_s_at	NFKB2	nuclear factor kappa B subunit 2	1.393	4.039
207543_s_at	P4HA1	prolyl 4-hydroxylase subunit alpha 1	2.177	4.7
207545_s_at	LOC101930388///LOC101928143///NUMB	uncharacterized LOC101930388///uncharacterized LOC101928143///NUMB, endocytic adaptor protein	1.134	2.198
207548_at	LOC100996542///GRM7	uncharacterized LOC100996542///glutamate metabotropic receptor 7	-5.733	9.092
207556_s_at	DGKZ	diacylglycerol kinase zeta	-2.922	7.607
207559_s_at	ZMYM3	zinc finger MYM-type containing 3	1.472	4.693
207593_at	ABCG4	ATP binding cassette subfamily G member 4	-2.908	4.977
207622_s_at	ABCF2	ATP binding cassette subfamily F member 2	1.446	4.796
207628_s_at	WBSCR22	Williams-Beuren syndrome chromosome region 22	1.449	6.577
207671_s_at	BEST1	bestrophin 1	-1.084	2.402
207695_s_at	IGSF1	immunoglobulin superfamily member 1	-1.819	1.82
207703_at	NLGN4Y	neuroligin 4, Y-linked	-1.864	2.168
207705_s_at	NINL	ninein like	2.514	4.277
207714_s_at	SERPINH1	serpin family H member 1	5.488	8.319
207717_s_at	PKP2	plakophilin 2	2.518	3.388
207722_s_at	BTBD2	BTB domain containing 2	1.394	2.317
207723_s_at	KLRC3	killer cell lectin like receptor C3	-1.303	4.623
207757_at	ZFP2	ZFP2 zinc finger protein	1.416	2.983
207761_s_at	METTL7A	methyltransferase like 7A	-3.996	8.044
207767_s_at	EGR4	early growth response 4	-4.11	5.173
207805_s_at	PSMD9	proteasome 26S subunit, non-ATPase 9	1.106	7.581
207808_s_at	PROS1	protein S (alpha)	3.42	8.419
207813_s_at	FDXR	ferredoxin reductase	2.79	8.5
207826_s_at	ID3	inhibitor of DNA binding 3, HLH protein	3.922	6.738
207828_s_at	CENPF	centromere protein F	6.841	21.866
207836_s_at	RBPMS	RNA binding protein with multiple splicing	1.238	1.674
207853_s_at	SNCB	synuclein beta	-7.232	16.72
207876_s_at	FLNC	filamin C	1.303	1.809
207877_s_at	NVL	nuclear VCP-like	1.255	5.096
207891_s_at	HAUS7///TREX2	HAUS augmin like complex subunit 7///three prime repair exonuclease 2	-1.191	2.348
207922_s_at	MAEA	macrophage erythroblast attacher	1.12	6.037
207936_x_at	RFPL3	ret finger protein like 3	-1.036	4.568
207949_s_at	ICA1	islet cell autoantigen 1	-1.676	4.832
207961_x_at	MYH11	myosin heavy chain 11	-1.212	2.029
207981_s_at	ESRRG	estrogen related receptor gamma	-4.906	10.222
207992_s_at	AMPD3	adenosine monophosphate deaminase 3	-3.483	6.017
207996_s_at	LDLRAD4	low density lipoprotein receptor class A domain containing 4	-2.908	6.363
208002_s_at	ACOT7	acyl-CoA thioesterase 7	-1.812	7.104
208017_s_at	MCF2	MCF.2 cell line derived transforming sequence	-4.846	13.026
208025_s_at	HMGA2	high mobility group AT-hook 2	7.208	11.758
208056_s_at	CBFA2T3	CBFA2/RUNX1 translocation partner 3	-1.767	2.901
208070_s_at	REV3L	REV3 like, DNA directed polymerase zeta catalytic subunit	1.394	2.471
208079_s_at	AURKA	aurora kinase A	4.571	17.27
208081_s_at	ZNF442	zinc finger protein 442	1.025	2.896
208089_s_at	TDRD3	tudor domain containing 3	1.642	7.826
208093_s_at	NDEL1	nudE neurodevelopment protein 1 like 1	-1.585	8.823
208102_s_at	PSD	pleckstrin and Sec7 domain containing	-2.629	6.845
208104_s_at	TSC22D4	TSC22 domain family member 4	-2.638	6.378
208107_s_at	LOC81691	exonuclease NEF-sp	1.353	3.473
208113_x_at	PABPC3	poly(A) binding protein cytoplasmic 3	1.03	6.855
208114_s_at	ISG20L2	interferon stimulated exonuclease gene 20 like 2	1.213	2.456
208117_s_at	LAS1L	LAS1 like, ribosome biogenesis factor	1.946	6.494
208119_s_at	ZNF93	zinc finger protein 93	2.451	7.727
208123_at	KCNB2	potassium voltage-gated channel subfamily B member 2	-1.935	5.548
208131_s_at	PTGIS	prostaglandin I2 (prostacyclin) synthase	2.492	3.577
208140_s_at	DRC3	dynein regulatory complex subunit 3	2.027	4.38
208146_s_at	CPVL	carboxypeptidase, vitellogenic like	-1.002	1.653
208149_x_at	DDX11	DEAD/H-box helicase 11	1.981	4.953
208158_s_at	OSBPL1A	oxysterol binding protein like 1A	-1.414	2.843
208161_s_at	ABCC3	ATP binding cassette subfamily C member 3	2.254	3.703
208165_s_at	PRSS16	protease, serine 16	-1.222	5.42
208190_s_at	LSR	lipolysis stimulated lipoprotein receptor	2.467	3.48
208205_at	PCDHA9	protocadherin alpha 9	1.838	4.82
208206_s_at	RASGRP2	RAS guanyl releasing protein 2	-2.443	6.759
208215_x_at	DRD4	dopamine receptor D4	1.549	2.907
208249_s_at	TGDS	TDP-glucose 4,6-dehydratase	2.207	6.604
208270_s_at	RNPEP	arginyl aminopeptidase	1.365	8.241
208311_at	GPR50	G protein-coupled receptor 50	1.56	2.282
208319_s_at	RBM3	RNA binding motif (RNP1, RRM) protein 3	3.053	8.821
208321_s_at	CABP1	calcium binding protein 1	-4.585	5.841
208335_s_at	ACKR1	atypical chemokine receptor 1 (Duffy blood group)	-4.958	10.252
208359_s_at	KCNJ4	potassium voltage-gated channel subfamily J member 4	-3.18	2.019
208361_s_at	POLR3D	RNA polymerase III subunit D	1.27	3.647
208393_s_at	RAD50	RAD50 double strand break repair protein	1.72	10.34
208394_x_at	ESM1	endothelial cell specific molecule 1	1.209	1.695
208451_s_at	C4B_2///C4B///C4A	complement component 4B (Chido blood group), copy 2///complement component 4B (Chido blood group)///complement component 4A (Rodgers blood group)	-3.294	3.853
208470_s_at	HPR///HP	haptoglobin-related protein///haptoglobin	-2.248	4.968
208471_at	HPR	haptoglobin-related protein	-2.357	8.356
208498_s_at	ACTG1P4///AMY2B///AMY2A///AMY1C///AMY1B///AMY1A	actin gamma 1 pseudogene 4///amylase, alpha 2B (pancreatic)///amylase, alpha 2A (pancreatic)///amylase, alpha 1C (salivary)///amylase, alpha 1B (salivary)///amylase, alpha 1A (salivary)	-2.221	3.271
208504_x_at	PCDHB11	protocadherin beta 11	2.626	6.929
208511_at	PTTG3P	pituitary tumor-transforming 3, pseudogene	1.267	5.15
208546_x_at	HIST1H2BH	histone cluster 1, H2bh	2.092	4.669
208561_at	ABCC9	ATP binding cassette subfamily C member 9	2.144	3.13
208567_s_at	LOC100996843///KCNJ18///KCNJ12	ATP-sensitive inward rectifier potassium channel 12-like///potassium voltage-gated channel subfamily J member 18///potassium voltage-gated channel subfamily J member 12	-2.924	2.844
208579_x_at	H2BFS	H2B histone family member S	2.224	3.69
208581_x_at	MT1X	metallothionein 1X	-2.429	4.306
208609_s_at	TNXB///TNXA	tenascin XB///tenascin XA (pseudogene)	-1.216	2.547
208612_at	PDIA3	protein disulfide isomerase family A member 3	1.418	6.409
208614_s_at	FLNB	filamin B	1.629	2.986
208620_at	PCBP1	poly(rC) binding protein 1	1.084	4.97
208623_s_at	EZR	ezrin	1.916	6.546
208625_s_at	EIF4G1	eukaryotic translation initiation factor 4 gamma 1	1.23	6.397
208626_s_at	VAT1	vesicle amine transport 1	2.494	5.509
208628_s_at	YBX1	Y-box binding protein 1	1.668	12.597
208631_s_at	HADHA	hydroxyacyl-CoA dehydrogenase/3-ketoacyl-CoA thiolase/enoyl-CoA hydratase (trifunctional protein), alpha subunit	1.135	4.353
208638_at	PDIA6	protein disulfide isomerase family A member 6	1.227	8.186
208642_s_at	XRCC5	X-ray repair cross complementing 5	1.876	13.163
208659_at	CLIC1	chloride intracellular channel 1	2.917	4.585
208675_s_at	DDOST	dolichyl-diphosphooligosaccharide--protein glycosyltransferase non-catalytic subunit	2.135	10.561
208677_s_at	BSG	basigin (Ok blood group)	1.328	3.159
208678_at	ATP6V1E1	ATPase H+ transporting V1 subunit E1	-2.408	10.868
208682_s_at	MAGED2	MAGE family member D2	1.547	7.662
208683_at	CAPN2	calpain 2	1.261	6.726
208690_s_at	PDLIM1	PDZ and LIM domain 1	1.876	2.186
208691_at	TFRC	transferrin receptor	1.062	2.931
208692_at	RPS3	ribosomal protein S3	1.38	8.843
208694_at	PRKDC	protein kinase, DNA-activated, catalytic polypeptide	1.091	6.23
208696_at	CCT5	chaperonin containing TCP1 subunit 5	1.012	5.976
208712_at	CCND1	cyclin D1	3.215	3.805
208713_at	HNRNPUL1	heterogeneous nuclear ribonucleoprotein U like 1	1.161	7.327
208716_s_at	TMCO1	transmembrane and coiled-coil domains 1	1.045	6.214
208717_at	OXA1L	OXA1L, mitochondrial inner membrane protein	1.119	6.432
208723_at	USP11	ubiquitin specific peptidase 11	-1.317	6.784
208756_at	EIF3I	eukaryotic translation initiation factor 3 subunit I	1.106	9.14
208758_at	ATIC	5-aminoimidazole-4-carboxamide ribonucleotide formyltransferase/IMP cyclohydrolase	1.25	5.101
208759_at	NCSTN	nicastrin	2.108	8.355
208763_s_at	TSC22D3	TSC22 domain family member 3	-1.805	6.308
208782_at	FSTL1	follistatin like 1	3.19	7.424
208783_s_at	CD46	CD46 molecule	1.14	3.88
208787_at	MRPL3	mitochondrial ribosomal protein L3	1.019	7.265
208789_at	PTRF	polymerase I and transcript release factor	3.034	3.453
208792_s_at	CLU	clusterin	-2.2	9.291
208794_s_at	SMARCA4	SWI/SNF related, matrix associated, actin dependent regulator of chromatin, subfamily a, member 4	1.527	7.167
208795_s_at	MCM7	minichromosome maintenance complex component 7	2.528	7.098
208796_s_at	CCNG1	cyclin G1	2.063	10.038
208808_s_at	HMGB2	high mobility group box 2	2.193	8.074
208813_at	GOT1	glutamic-oxaloacetic transaminase 1	-2.468	8.916
208815_x_at	HSPA4	heat shock protein family A (Hsp70) member 4	1.206	4.634
208816_x_at	ANXA2P2	annexin A2 pseudogene 2	2.718	3.344
208821_at	SNRPB	small nuclear ribonucleoprotein polypeptides B and B1	2.203	9.831
208822_s_at	DAP3	death associated protein 3	1.035	7.547
208836_at	ATP1B3	ATPase Na+/K+ transporting subunit beta 3	1.212	4.919
208837_at	TMED3	transmembrane p24 trafficking protein 3	1.327	5.159
208851_s_at	THY1	Thy-1 cell surface antigen	-3.444	7.375
208858_s_at	ESYT1	extended synaptotagmin 1	1.474	4.711
208862_s_at	TMX2-CTNND1///CTNND1	TMX2-CTNND1 readthrough (NMD candidate)///catenin delta 1	2.812	11.103
208868_s_at	GABARAPL1	GABA type A receptor associated protein like 1	-2.768	5.04
208873_s_at	REEP5	receptor accessory protein 5	-1.758	9.327
208877_at	PAK2	p21 (RAC1) activated kinase 2	1.071	5.602
208882_s_at	UBR5	ubiquitin protein ligase E3 component n-recognin 5	1.016	1.598
208887_at	EIF3G	eukaryotic translation initiation factor 3 subunit G	1.184	7.004
208890_s_at	PLXNB2	plexin B2	1.421	3.793
208906_at	HNRNPUL2-BSCL2///BSCL2	HNRNPUL2-BSCL2 readthrough (NMD candidate)///BSCL2, seipin lipid droplet biogenesis associated	-1.746	6.12
208912_s_at	CNP	2',3'-cyclic nucleotide 3' phosphodiesterase	-1.818	4.482
208916_at	SLC1A5	solute carrier family 1 member 5	1.472	4.216
208925_at	CLDND1	claudin domain containing 1	-1.143	2.642
208928_at	POR	cytochrome p450 oxidoreductase	1.565	9.333
208932_at	PPP4C	protein phosphatase 4 catalytic subunit	2.582	11.381
208933_s_at	LGALS8	galectin 8	-1.678	6.29
208939_at	SEPHS1	selenophosphate synthetase 1	1.636	8.131
208950_s_at	ALDH7A1	aldehyde dehydrogenase 7 family member A1	1.62	11.238
208967_s_at	AK2	adenylate kinase 2	1.583	4.371
208974_x_at	KPNB1	karyopherin subunit beta 1	1.058	6.787
208986_at	TCF12	transcription factor 12	1.814	6.251
208998_at	UCP2	uncoupling protein 2	2.179	5.986
209008_x_at	KRT8	keratin 8	2.846	4.24
209019_s_at	PINK1	PTEN induced putative kinase 1	-1.979	10.874
209022_at	STAG2	stromal antigen 2	1.071	6.901
209035_at	MDK	midkine (neurite growth-promoting factor 2)	4.844	9.231
209044_x_at	SF3B4	splicing factor 3b subunit 4	1.207	10.991
209045_at	XPNPEP1	X-prolyl aminopeptidase 1	1.2	11.119
209047_at	AQP1	aquaporin 1 (Colton blood group)	-2.485	1.669
209049_s_at	ZMYND8	zinc finger MYND-type containing 8	1.236	2.529
209054_s_at	WHSC1	Wolf-Hirschhorn syndrome candidate 1	2.364	9.728
209063_x_at	PAIP1	poly(A) binding protein interacting protein 1	1.198	6.226
209067_s_at	HNRNPDL	heterogeneous nuclear ribonucleoprotein D like	1.25	7.854
209074_s_at	FAM107A	family with sequence similarity 107 member A	-1.701	4.156
209081_s_at	COL18A1	collagen type XVIII alpha 1 chain	1.851	3.182
209083_at	CORO1A	coronin 1A	-2.641	5.86
209085_x_at	RFC1	replication factor C subunit 1	1.525	5.82
209092_s_at	GLOD4	glyoxalase domain containing 4	1.421	5.727
209094_at	DDAH1	dimethylarginine dimethylaminohydrolase 1	-1.034	3.53
209100_at	IFRD2	interferon related developmental regulator 2	1.29	3.979
209101_at	CTGF	connective tissue growth factor	2.057	3.629
209106_at	NCOA1	nuclear receptor coactivator 1	-1.88	11.706
209108_at	TSPAN6	tetraspanin 6	3.26	11.734
209110_s_at	RGL2	ral guanine nucleotide dissociation stimulator like 2	1.438	4.163
209116_x_at	HBB	hemoglobin subunit beta	-2.648	3.892
209117_at	WBP2	WW domain binding protein 2	-1.164	3.765
209120_at	NR2F2	nuclear receptor subfamily 2 group F member 2	2.133	2.52
209122_at	PLIN2	perilipin 2	2.945	9.306
209123_at	QDPR	quinoid dihydropteridine reductase	-2.593	9.256
209129_at	TRIP6	thyroid hormone receptor interactor 6	2.509	5.469
209132_s_at	COMMD4	COMM domain containing 4	2.718	10.086
209150_s_at	IPO4///TM9SF1	importin 4///transmembrane 9 superfamily member 1	2.156	10.253
[truncated: 4,372 more rows]

## Sheet: EPN
Differentially Expressed Genes in EPN (Figure A4b)
Probe ID	Gene symbol	Gene description	log2(fold change)	-LOG10(Pvalue)
1255_g_at	GUCA1A	guanylate cyclase activator 1A	-2.196	8.329
1405_i_at	CCL5	C-C motif chemokine ligand 5	1.041	2.447
1552296_at	BEST4	bestrophin 4	4.017	17.686
1552301_a_at	CORO6	coronin 6	-3.414	7.259
1552306_at	ALG10	ALG10, alpha-1,2-glucosyltransferase	1.178	7.372
1552320_a_at	CCDC65	coiled-coil domain containing 65	4.155	10.795
1552323_s_at	FAM122C	family with sequence similarity 122C	1.155	4.964
1552325_at	CFAP53	cilia and flagella associated protein 53	1.659	2.602
1552365_at	SCIN	scinderin	4.397	10.722
1552370_at	C4orf33	chromosome 4 open reading frame 33	1.397	5.298
1552400_a_at	TMEM266	transmembrane protein 266	-1.118	2.243
1552422_at	C10orf25	chromosome 10 open reading frame 25	1.976	8.995
1552448_a_at	FAM167A-AS1	FAM167A antisense RNA 1	3.932	18.407
1552504_a_at	BRSK1	BR serine/threonine kinase 1	-3.151	13.663
1552506_at	CRB2	crumbs 2, cell polarity complex component	2.666	26.127
1552521_a_at	TMEM74	transmembrane protein 74	2.421	3.277
1552523_a_at	TIGD4	tigger transposable element derived 4	1.79	11.328
1552540_s_at	IQCD	IQ motif containing D	2.074	12.663
1552557_a_at	ZDHHC15	zinc finger DHHC-type containing 15	3.275	27.696
1552689_at	CASKIN1	CASK interacting protein 1	-4.024	28.927
1552711_a_at	CYB5D1	cytochrome b5 domain containing 1	1.95	8.547
1552714_at	CREG2	cellular repressor of E1A stimulated genes 2	-5.177	20.667
1552716_at	SPEF2	sperm flagellar 2	2.045	5.736
1552717_s_at	CEP170P1///CEP170	centrosomal protein 170 pseudogene 1///centrosomal protein 170	1.261	1.78
1552742_at	KCNH8	potassium voltage-gated channel subfamily H member 8	-1.925	2.875
1552754_a_at	CADM2	cell adhesion molecule 2	-4.986	19.406
1552767_a_at	HS6ST2	heparan sulfate 6-O-sulfotransferase 2	-2.662	7.384
1552846_s_at	RAB42	RAB42, member RAS oncogene family	1.17	7.457
1552848_a_at	PTCHD1	patched domain containing 1	-3.493	9.799
1552879_a_at	ATOH7	atonal bHLH transcription factor 7	-1.984	14.919
1552897_a_at	KCNG3	potassium voltage-gated channel modifier subfamily G member 3	-1.939	10.164
1552938_at	ZIC5	Zic family member 5	1.537	3.68
1552950_at	CFAP161	cilia and flagella associated protein 161	3.106	9.328
1552953_a_at	NEUROD2	neuronal differentiation 2	-3.178	2.447
1552977_a_at	CNPY3	canopy FGF signaling regulator 3	1.183	6.313
1553013_at	CNTNAP5	contactin associated protein like 5	-4.33	24.677
1553126_a_at	SLC39A12	solute carrier family 39 member 12	-2.675	4.355
1553159_at	DNAH11	dynein axonemal heavy chain 11	2.159	11.955
1553211_at	ANKFN1	ankyrin repeat and fibronectin type III domain containing 1	3.321	24.257
1553228_at	CCDC89	coiled-coil domain containing 89	3.204	10.094
1553229_at	ZNF572	zinc finger protein 572	1.492	12.247
1553254_at	MAGEE2	MAGE family member E2	-2.421	4.558
1553286_at	ZNF555	zinc finger protein 555	1.335	9.594
1553288_a_at	NYAP1	neuronal tyrosine phosphorylated phosphoinositide-3-kinase adaptor 1	-1.36	2.648
1553292_s_at	SGK494	uncharacterized serine/threonine-protein kinase SgK494	-3.642	16.984
1553299_at	DUSP5P1	dual specificity phosphatase 5 pseudogene 1	1.253	5.119
1553321_a_at	SULT1C4	sulfotransferase family 1C member 4	4.422	20.346
1553347_s_at	KCNA6	potassium voltage-gated channel subfamily A member 6	2.772	4.207
1553357_at	LINC00889	long intergenic non-protein coding RNA 889	-4.965	20.573
1553400_a_at	MGC57346///CRHR1-IT1	ADP-ribosylation factor pseudogene///CRHR1 intronic transcript 1	-1.228	4.788
1553410_a_at	ABCC12	ATP binding cassette subfamily C member 12	-1.821	12.675
1553420_at	SATB2-AS1	SATB2 antisense RNA 1	-1.497	12.102
1553440_at	AQP4-AS1	AQP4 antisense RNA 1	3.988	8.044
1553479_at	TMEM145	transmembrane protein 145	-1.587	2.555
1553485_at	CCDC140	coiled-coil domain containing 140	1.224	5.287
1553611_s_at	KLHL35	kelch like family member 35	-2.577	10.892
1553613_s_at	FOXC1	forkhead box C1	-1.302	2.4
1553622_a_at	FSIP1	fibrous sheath interacting protein 1	3.127	22.665
1553630_at	C10orf107	chromosome 10 open reading frame 107	2.211	7.834
1553635_s_at	TCTEX1D1	Tctex1 domain containing 1	6.926	19.74
1553684_at	PPIL6	peptidylprolyl isomerase like 6	2.467	14.823
1553718_at	ZNF548	zinc finger protein 548	1.585	2.298
1553729_s_at	LRRC43	leucine rich repeat containing 43	3.04	16.488
1553734_at	AK7	adenylate kinase 7	5.307	12.967
1553794_at	STOML3	stomatin like 3	3.155	9.246
1553797_a_at	LINC01105	long intergenic non-protein coding RNA 1105	-5.733	26.885
1553798_a_at	FBXL13	F-box and leucine rich repeat protein 13	3.096	19.423
1553905_at			1.55	6.035
1553954_at	ALG14	ALG14, UDP-N-acetylglucosaminyltransferase subunit	1.651	5.62
1553956_at	TMEM237	transmembrane protein 237	1.543	9.042
1553971_a_at	GATS	GATS, stromal antigen 3 opposite strand	-1.344	4.376
1553976_a_at	DPCD	deleted in primary ciliary dyskinesia homolog (mouse)	1.541	5.775
1553978_at	BORCS8	BLOC-1 related complex subunit 8	2.767	13.211
1553990_at	BRICD5	BRICHOS domain containing 5	-1.237	2.601
1553992_s_at	NBR2	neighbor of BRCA1 gene 2 (non-protein coding)	1.277	2.43
1553997_a_at	ASPHD1	aspartate beta-hydroxylase domain containing 1	-7.465	26.072
1553998_at	DMRTC1B///DMRTC1	DMRT like family C1B///DMRT like family C1	-1.792	8.541
1554044_a_at	MRAP	melanocortin 2 receptor accessory protein	1.864	8.342
1554062_at	XG	Xg blood group	3.599	15.587
1554079_at	GALNT18	polypeptide N-acetylgalactosaminyltransferase 18	-2.277	8.627
1554097_a_at	MIR31HG	MIR31 host gene	3.501	17.833
1554143_a_at	SUGT1P3	SGT1 homolog, MIS12 kinetochore complex assembly cochaperone pseudogene 3	-1.699	7.291
1554155_at	MCPH1	microcephalin 1	1.078	3.244
1554181_at	SNX32	sorting nexin 32	-3.987	16.304
1554234_at	KATNAL2	katanin catalytic subunit A1 like 2	1.358	5.245
1554290_at	LOC101929134///HERC3	uncharacterized LOC101929134///HECT and RLD domain containing E3 ubiquitin protein ligase 3	-1.194	10.037
1554298_a_at	WDR49	WD repeat domain 49	4.891	15.912
1554299_at	NPAS4	neuronal PAS domain protein 4	-4.525	11.235
1554300_a_at	SVOPL	SVOP like	1.211	3.42
1554331_a_at	LRRC18	leucine rich repeat containing 18	2.463	8.431
1554414_a_at	OSGIN2	oxidative stress induced growth inhibitor family member 2	2.656	6.393
1554479_a_at	CARD8	caspase recruitment domain family member 8	2.123	10.259
1554526_at	OLFM3	olfactomedin 3	-6.153	36.423
1554542_at	SLC25A48	solute carrier family 25 member 48	-1.539	6.456
1554559_at	GPR62	G protein-coupled receptor 62	-1.605	7.589
1554572_a_at	SUV39H2	suppressor of variegation 3-9 homolog 2	1.256	5.844
1554588_a_at	TTC30B	tetratricopeptide repeat domain 30B	4.871	20.529
1554593_s_at	SLC1A6	solute carrier family 1 member 6	-5.288	10.968
1554627_a_at	ASCC1	activating signal cointegrator 1 complex subunit 1	1.754	9.415
1554640_at	PALM2	paralemmin 2	-3.308	14.692
1554655_a_at	RPRML	reprimo like	-2.854	3.786
1554706_at	OR2L13	olfactory receptor family 2 subfamily L member 13	-3.476	32.613
1554801_at	FNDC9	fibronectin type III domain containing 9	-3.752	24.416
1554960_at	CCDC190	coiled-coil domain containing 190	3.016	15.066
1555041_a_at	NAGA	alpha-N-acetylgalactosaminidase	2.559	17.889
1555112_a_at	CCDC181	coiled-coil domain containing 181	1.464	3.625
1555268_a_at	GRID1	glutamate ionotropic receptor delta type subunit 1	-1.742	5.823
1555310_a_at	PAK6	p21 (RAC1) activated kinase 6	-3.77	12.959
1555363_s_at	LINC00663	long intergenic non-protein coding RNA 663	1.447	7.719
1555385_at	B4GALNT1	beta-1,4-N-acetyl-galactosaminyltransferase 1	-3.414	7.341
1555396_s_at	CXorf67	chromosome X open reading frame 67	3.419	19.132
1555509_a_at	SLC25A41	solute carrier family 25 member 41	-1.235	11.368
1555573_at	CFAP46	cilia and flagella associated protein 46	2.067	5.904
1555752_at	STH	saitohin	-1.14	2.828
1555758_a_at	CDKN3	cyclin dependent kinase inhibitor 3	1.317	2.053
1555786_s_at	LINC00520	long intergenic non-protein coding RNA 520	1.117	2.482
1555804_a_at	MAP3K19	mitogen-activated protein kinase kinase kinase 19	7.247	44.637
1555820_a_at	MKS1	Meckel syndrome, type 1	2.166	15.152
1555844_s_at	HNRNPM	heterogeneous nuclear ribonucleoprotein M	1.062	11.948
1555852_at	PSMB8-AS1	PSMB8 antisense RNA 1 (head to head)	3.191	11.831
1555867_at	GNG4	G protein subunit gamma 4	-1.7	4.099
1555883_s_at	SPIN3	spindlin family member 3	-1.275	9.749
1555889_a_at	CRTAP	cartilage associated protein	1.072	2.535
1555912_at	ST7-AS1	ST7 antisense RNA 1	1.21	7.716
1555916_at	RPUSD3	RNA pseudouridylate synthase domain containing 3	-1.459	14.236
1555935_s_at	HUNK	hormonally up-regulated Neu-associated kinase	-2.025	3.109
1556001_at	LOC284939///MAPK8IP2	uncharacterized LOC284939///mitogen-activated protein kinase 8 interacting protein 2	-2.962	15.355
1556003_a_at	LOC101928817	uncharacterized LOC101928817	6.083	15.517
1556047_s_at	MAGEE1	MAGE family member E1	-3.838	23.711
1556048_at	LOC100507564	uncharacterized LOC100507564	1.299	6.978
1556057_s_at	NEUROD1	neuronal differentiation 1	-4.662	4.716
1556064_at	LOC284926	uncharacterized LOC284926	1.803	6.962
1556096_s_at	UNC13C	unc-13 homolog C	-8.612	32.743
1556097_at	HOMER2	homer scaffolding protein 2	-1.362	4.019
1556117_at	LINC01260	long intergenic non-protein coding RNA 1260	-1.316	8.198
1556123_a_at	RAB11B-AS1	RAB11B antisense RNA 1	1.073	4.73
1556145_a_at	LOC100131170	uncharacterized LOC100131170	-2.628	6.5
1556158_at	SAXO2	stabilizer of axonemal microtubules 2	2.841	13.288
1556228_a_at	VCPIP1	valosin containing protein interacting protein 1	-1.669	9.44
1556235_at	CH17-408M7.1///LOC101929257///LOC101927468	uncharacterized LOC102724558///uncharacterized LOC101929257///uncharacterized LOC101927468	1.097	7.318
1556244_s_at	LOC375196	uncharacterized LOC375196	-2.474	22.072
1556308_at	PRRT3	proline rich transmembrane protein 3	-3.299	24.238
1556319_at	TRIM44	tripartite motif containing 44	-1.245	6.089
1556325_at	FILIP1	filamin A interacting protein 1	1.651	3.818
1556351_at	HCN1	hyperpolarization activated cyclic nucleotide gated potassium channel 1	-1.984	2.452
1556366_s_at	LY86-AS1	LY86 antisense RNA 1	-3.547	15.863
1556371_at	OLIG3	oligodendrocyte transcription factor 3	1.972	4.988
1556377_s_at	LMO7	LIM domain 7	-1.632	13.137
1556421_at	C8orf34-AS1	C8orf34 antisense RNA 1	2.746	7.355
1556425_a_at	LOC284219	uncharacterized LOC284219	-1.842	2.57
1556427_s_at	LRRN4CL	LRRN4 C-terminal like	2.106	8.335
1556435_at	LOC400622	uncharacterized LOC400622	-1.07	8.324
1556499_s_at	COL1A1	collagen type I alpha 1 chain	3.497	6.375
1556598_at	ARPP21	cAMP regulated phosphoprotein 21	-1.331	6.101
1556599_s_at	ARPP21	cAMP regulated phosphoprotein 21	-3.36	16.298
1556627_at	DRP2	dystrophin related protein 2	-4.123	7.281
1556641_at	SLC7A14	solute carrier family 7 member 14	-6.478	24.767
1556665_at	TTC6	tetratricopeptide repeat domain 6	1.267	3.354
1556666_a_at	TTC6	tetratricopeptide repeat domain 6	1.784	6.239
1556711_at	FAM216B	family with sequence similarity 216 member B	4.346	12.023
1556798_a_at	RNF144A-AS1	RNF144A antisense RNA 1	-1.74	15.839
1556821_x_at	DLEU2	deleted in lymphocytic leukemia 2 (non-protein coding)	1.815	4.104
1556876_s_at	LOC101930578///TPTE2P2	uncharacterized LOC101930578///transmembrane phosphoinositide 3-phosphatase and tensin homolog 2 pseudogene 2	2.198	12.462
1556907_at	ZNF474	zinc finger protein 474	5.215	33.425
1556941_a_at	LOC283484	uncharacterized LOC283484	-3.164	13.67
1556988_s_at	CHD1L	chromodomain helicase DNA binding protein 1 like	1.365	8.213
1557038_s_at	UBAC2-AS1	UBAC2 antisense RNA 1	1.718	11.111
1557049_at	BTBD19	BTB domain containing 19	3.105	22.326
1557050_at	HOTAIRM1	HOXA transcript antisense RNA, myeloid-specific 1	1.389	4.064
1557055_s_at	LINC01128	long intergenic non-protein coding RNA 1128	1.13	4.948
1557073_s_at	TTBK2	tau tubulin kinase 2	-2.141	19.954
1557098_s_at	HAR1A	highly accelerated region 1A (non-protein coding)	-3.647	31.373
1557103_a_at	LMTK3	lemur tyrosine kinase 3	-2.107	3.714
1557107_at	SLC26A4-AS1	SLC26A4 antisense RNA 1	-3.99	15.714
1557119_a_at	ZNF575	zinc finger protein 575	-1.162	7.104
1557122_s_at	GABRB2	gamma-aminobutyric acid type A receptor beta2 subunit	-7.408	33.347
1557133_at	LINC00632	long intergenic non-protein coding RNA 632	-2.457	10.388
1557137_at	TMEM17	transmembrane protein 17	1.745	6.933
1557143_at	CSMD2	CUB and Sushi multiple domains 2	-2.328	21.767
1557166_at	PDCD4	programmed cell death 4 (neoplastic transformation inhibitor)	-2.289	10.776
1557181_s_at	C11orf87	chromosome 11 open reading frame 87	-2.054	3.751
1557203_at	PABPC1L2B///PABPC1L2A	poly(A) binding protein cytoplasmic 1 like 2B///poly(A) binding protein cytoplasmic 1 like 2A	-3.708	33.39
1557283_a_at	ZNF519	zinc finger protein 519	-2.101	12.574
1557395_at	IGFBP7-AS1	IGFBP7 antisense RNA 1	5.18	18.096
1557411_s_at	SLC25A43	solute carrier family 25 member 43	3.095	11.816
1557417_s_at	RSPH10B2///RSPH10B	radial spoke head 10 homolog B2///radial spoke head 10 homolog B	3.894	12.876
1557430_at	SMIM17	small integral membrane protein 17	-3.923	24.496
1557451_at	DGCR10	DiGeorge syndrome critical region gene 10 (non-protein coding)	-1.087	6.983
1557474_at	LOC284578	uncharacterized LOC284578	-3.064	23.636
1557475_at	LINC00507	long intergenic non-protein coding RNA 507	-4.362	15.696
1557481_a_at	LINC00320	long intergenic non-protein coding RNA 320	-2.372	15.448
1557544_at	CFAP58	cilia and flagella associated protein 58	2.576	8.884
1557545_s_at	RNF165	ring finger protein 165	-2.255	5.765
1557617_at	DCTN1-AS1	DCTN1 antisense RNA 1	-4.245	32.322
1557636_a_at	C7orf57	chromosome 7 open reading frame 57	6.877	17.789
1557680_at	SAMD15	sterile alpha motif domain containing 15	1.176	3.508
1557867_s_at	CFAP157	cilia and flagella associated protein 157	3.326	5.55
1557948_at	PHLDB3	pleckstrin homology like domain family B member 3	1.107	6.009
1558041_a_at	KIAA0895L	KIAA0895 like	-1.169	4.768
1558077_s_at	MDH1B	malate dehydrogenase 1B	3.628	7.36
1558118_at	LOC100287576///DGCR5	uncharacterized LOC100287576///DiGeorge syndrome critical region gene 5 (non-protein coding)	-1.931	15.256
1558123_at	LINC00957	long intergenic non-protein coding RNA 957	-3.261	9.064
1558189_a_at	LOC284570///GPR37L1	uncharacterized LOC284570///G protein-coupled receptor 37 like 1	1.32	4.114
1558195_at	LINC00592	long intergenic non-protein coding RNA 592	-1.6	14.383
1558256_at	LINC00662	long intergenic non-protein coding RNA 662	1.749	12.951
1558290_a_at	MIR1204///PVT1	microRNA 1204///Pvt1 oncogene (non-protein coding)	2.228	10.591
1558322_a_at	PAQR9	progestin and adipoQ receptor family member 9	-1.455	16.752
1558333_at	C22orf15	chromosome 22 open reading frame 15	1.32	5.173
1558345_a_at	LOC439911	uncharacterized LOC439911	2.4	8.544
1558354_s_at	PLCG1-AS1	PLCG1 antisense RNA 1	1.019	4.206
1558368_s_at	DRAXIN	dorsal inhibitory axon guidance protein	3.506	6.351
1558404_at	LINC00622	long intergenic non-protein coding RNA 622	-5.035	16.738
1558414_at	FRRS1L	ferric chelate reductase 1 like	-2.38	6.066
1558486_at	ZNF493	zinc finger protein 493	-2.16	7.641
1558508_a_at	C1orf53	chromosome 1 open reading frame 53	-2.809	2.869
1558515_at	FTX	FTX transcript, XIST regulator (non-protein coding)	-1.07	1.634
1558530_at	LRTM2	leucine rich repeats and transmembrane domains 2	-3.171	23.057
1558569_at	LOC100131541	uncharacterized LOC100131541	1.286	6.079
1558579_at	FLJ37786	uncharacterized LOC642691	3.448	10.427
1558620_at	ZNF621	zinc finger protein 621	1.528	9.232
1558711_at	FAM13A-AS1	FAM13A antisense RNA 1	-1.194	2.17
1558795_at	LOC101928307	uncharacterized LOC101928307	-2.994	7.687
1558930_at	LINC00460	long intergenic non-protein coding RNA 460	-1.113	6.924
1558944_at	LOC100507353///CACNA1A	uncharacterized LOC100507353///calcium voltage-gated channel subunit alpha1 A	2.845	6.975
1558971_at	THEMIS	thymocyte selection associated	-1.447	7.816
1559033_at	LINC01018	long intergenic non-protein coding RNA 1018	-1.378	8.984
1559067_a_at	LOC158402	uncharacterized LOC158402	-2.048	4.766
1559072_a_at	ELFN2	extracellular leucine rich repeat and fibronectin type III domain containing 2	-1.772	3.081
1559163_at	INHBA-AS1	INHBA antisense RNA 1	-1.534	3.511
1559194_a_at	CLEC4GP1	C-type lectin domain family 4 member G pseudogene 1	-1.394	13.48
1559266_s_at	SKIDA1	SKI/DACH domain containing 1	1.599	3.913
1559283_a_at	CNPY1	canopy FGF signaling regulator 1	1.728	2.027
1559315_s_at	SOCS2-AS1	SOCS2 antisense RNA 1	1.004	3.747
1559545_at	LOC101930404///SNORD116-28///SNORD115-26///SNORD115-13///SNORD115-7///SNORD116-22///SNORD116-4///PWARSN///SNORD107///SNRPN///IPW	uncharacterized LOC101930404///small nucleolar RNA, C/D box 116-28///small nucleolar RNA, C/D box 115-26///small nucleolar RNA, C/D box 115-13///small nucleolar RNA, C/D box 115-7///small nucleolar RNA, C/D box 116-22///small nucleolar RNA, C/D box 116-4///Prader Willi/Angelman region RNA, SNRPN neighbor///small nucleolar RNA, C/D box 107///small nuclear ribonucleoprotein polypeptide N///imprinte…	-4.807	33.441
1559603_at	GPR12	G protein-coupled receptor 12	-1.324	11.605
1559650_at	JAZF1-AS1	JAZF1 antisense RNA 1	-1.303	15.644
1559760_at	LOC401220	uncharacterized LOC401220	-3.109	14.339
1559766_at	ALDH1L1-AS2	ALDH1L1 antisense RNA 2	1.395	6.429
1560250_s_at	LOC284242	uncharacterized LOC284242	-1.117	1.727
1560426_at	CFAP54	cilia and flagella associated protein 54	2.035	11.616
1560477_a_at	SAMD11	sterile alpha motif domain containing 11	1.1	4.374
1560522_at	DLGAP1-AS3	DLGAP1 antisense RNA 3	-1.518	13.486
1560562_a_at	ZNF677	zinc finger protein 677	1.278	4.946
1560587_s_at	PRDX5	peroxiredoxin 5	1.084	4.633
1560692_at	VSTM2A-OT1///VSTM2A	VSTM2A overlapping transcript 1///V-set and transmembrane domain containing 2A	-3.804	14.768
1560698_a_at	TRHDE-AS1	TRHDE antisense RNA 1	-3.839	17.369
1560741_at	SNURF///SNRPN	SNRPN upstream reading frame///small nuclear ribonucleoprotein polypeptide N	-2.323	7.184
1561106_at	LINC00271	long intergenic non-protein coding RNA 271	1.503	8.999
1561394_s_at	KIAA1755	KIAA1755	-1.242	3.721
1561402_at	LINC00880	long intergenic non-protein coding RNA 880	1.915	12.022
1561403_at	SOHLH1	spermatogenesis and oogenesis specific basic helix-loop-helix 1	-1.914	14.864
1561660_at	SLC25A53	solute carrier family 25 member 53	3.09	15.726
1562273_at	CNGA4	cyclic nucleotide gated channel alpha 4	1.406	5.003
1562371_s_at	VWA3B	von Willebrand factor A domain containing 3B	6.758	33.239
1562386_s_at	ZNF501	zinc finger protein 501	1.673	6.662
1562403_a_at	SLC8A3	solute carrier family 8 member A3	-5.593	24.648
1562733_at	LINC00092	long intergenic non-protein coding RNA 92	2.71	8.743
1562831_a_at	WDR11-AS1	WDR11 antisense RNA 1	3.328	13.353
1563022_at	CCDC160	coiled-coil domain containing 160	2.308	8.395
1563182_at	ACVR1C	activin A receptor type 1C	-2.588	5.246
1563638_at	TVP23A	trans-golgi network vesicle protein 23 homolog A	-1.257	2.142
1563646_a_at	TMEM67	transmembrane protein 67	5.304	24.276
1563814_at	C2orf50	chromosome 2 open reading frame 50	3.466	23.791
1563827_at	LOC158434	uncharacterized LOC158434	1.058	2.522
1563830_a_at	FHAD1	forkhead associated phosphopeptide binding domain 1	3.251	17.104
1563933_a_at	PLD5	phospholipase D family member 5	-2.536	2.421
1564002_a_at	AK9	adenylate kinase 9	1.148	1.859
1564031_a_at	RELL2	RELT like 2	-4.607	17.114
1564040_a_at	TMEM235	transmembrane protein 235	-3.329	18.223
1564158_a_at	VAC14-AS1	VAC14 antisense RNA 1	2.69	7.624
1564160_at	DTHD1	death domain containing 1	3.067	13.623
1564193_at	KIAA2012	KIAA2012	2.616	12.748
1564207_at	LINC00957	long intergenic non-protein coding RNA 957	-3.119	21.348
1564220_a_at	LINC01234	long intergenic non-protein coding RNA 1234	-1.119	11.37
1564307_a_at	A2ML1	alpha-2-macroglobulin like 1	2.225	8.245
1564372_s_at	CASC2	cancer susceptibility candidate 2 (non-protein coding)	2.037	10.066
1564475_s_at	ZBED3-AS1	ZBED3 antisense RNA 1	1.907	8.359
1564559_at	LOC728073	uncharacterized LOC728073	-1.411	6.992
1564757_a_at	CCDC148	coiled-coil domain containing 148	1.126	4.446
1566219_at	KRTAP5-AS1	KRTAP5-1/KRTAP5-2 antisense RNA 1	-2.598	9.246
1566257_at	GPR180	G protein-coupled receptor 180	-1.165	6.214
1566557_at	BAIAP2-AS1	BAIAP2 antisense RNA 1 (head to head)	1.238	4.55
1568597_at	LOC646762	uncharacterized LOC646762	-1.443	13.682
1568604_a_at	CADPS	calcium dependent secretion activator	-5.169	18.379
1568606_at	C11orf88	chromosome 11 open reading frame 88	6.584	29.346
1568612_at	GABRG2	gamma-aminobutyric acid type A receptor gamma2 subunit	-9.038	29.396
1568625_at	SVOP	SV2 related protein	-3.647	23.699
1568683_at	SNAI3-AS1	SNAI3 antisense RNA 1	-1.195	10.794
1568763_s_at	LOC102724884///LOC728613///PDCD6	uncharacterized LOC102724884///programmed cell death 6 pseudogene///programmed cell death 6	2.079	7.951
1568768_s_at	BRE-AS1	BRE antisense RNA 1	-1.739	3.771
1568796_at	CCDC157	coiled-coil domain containing 157	1.114	2.272
1568807_a_at	RBM26-AS1	RBM26 antisense RNA 1	1.138	2.413
1568868_at	CYP27C1	cytochrome P450 family 27 subfamily C member 1	2.218	4.472
1568870_at	SLC24A4	solute carrier family 24 member 4	-1.956	2.852
1568906_at	LOC728196	uncharacterized LOC728196	1.489	4.652
1568924_a_at	IQUB	IQ motif and ubiquitin domain containing	3.936	24.341
1568933_at	LYPD8	LY6/PLAUR domain containing 8	-2.005	14.153
1569003_at	VMP1	vacuole membrane protein 1	1.28	3.642
1569110_x_at	LOC728613	programmed cell death 6 pseudogene	6.05	18.608
1569157_s_at	LOC100505555///ZNF846	uncharacterized LOC100505555///zinc finger protein 846	1.19	4.024
1569172_a_at	CFAP99	cilia and flagella associated protein 99	1.333	8.822
1569256_a_at	FAM43B	family with sequence similarity 43 member B	-2.054	11.803
1569369_at	ZFYVE28	zinc finger FYVE-type containing 28	-2.918	13.205
1569607_s_at	LOC102725051///LOC102723891///ANKRD20A4///ANKRD20A2///ANKRD20A3///ANKRD20A5P///ANKRD20A11P///ANKRD20A9P///ANKRD20A1	uncharacterized LOC102725051///ankyrin repeat domain-containing protein 20B-like///ankyrin repeat domain 20 family member A4///ankyrin repeat domain 20 family member A2///ankyrin repeat domain 20 family member A3///ankyrin repeat domain 20 family member A5, pseudogene///ankyrin repeat domain 20 family member A11, pseudogene///ankyrin repeat domain 20 family member A9, pseudogene///ankyrin repeat …	-2.698	11.518
1569713_at	SEC24B-AS1	SEC24B antisense RNA 1	1.148	7.542
1569868_s_at	EME2	essential meiotic structure-specific endonuclease subunit 2	-1.689	4.344
1569872_a_at	LMF1	lipase maturation factor 1	-3.573	11.219
1569886_a_at	GLB1L3	galactosidase beta 1 like 3	-1.307	9.373
1570208_at	LINC00907	long intergenic non-protein coding RNA 907	1.3	4.802
1570253_a_at	RHEBL1	Ras homolog enriched in brain like 1	-2.288	2.706
200015_s_at	45171	septin 2	1.091	14.24
200046_at	DAD1	defender against cell death 1	1.165	16.175
200052_s_at	ILF2	interleukin enhancer binding factor 2	1.338	10.826
200058_s_at	LOC101929240///SNRNP200	U5 small nuclear ribonucleoprotein 200 kDa helicase pseudogene///small nuclear ribonucleoprotein U5 subunit 200	1.071	15.695
200066_at	IK	IK cytokine, down-regulator of HLA II	1.148	6.506
200073_s_at	HNRNPD	heterogeneous nuclear ribonucleoprotein D	1.025	12.015
200078_s_at	ATP6V0B	ATPase H+ transporting V0 subunit b	-1.183	15.86
200599_s_at	MIR3652///HSP90B1	microRNA 3652///heat shock protein 90 beta family member 1	1.093	11.27
200600_at	MSN	moesin	2.43	17.359
200606_at	DSP	desmoplakin	1.853	3.235
200634_at	PFN1	profilin 1	1.063	6.451
200651_at	SNORD96A///SNORD95///RACK1	small nucleolar RNA, C/D box 96A///small nucleolar RNA, C/D box 95///receptor for activated C kinase 1	1.059	13.264
200656_s_at	P4HB	prolyl 4-hydroxylase subunit beta	1.756	7.152
200660_at	S100A11	S100 calcium binding protein A11	2.23	5.452
200663_at	CD63	CD63 molecule	1.365	14.424
200665_s_at	SPARC	secreted protein acidic and cysteine rich	1.475	8.003
200677_at	PTTG1IP	pituitary tumor-transforming 1 interacting protein	1.084	8.015
200678_x_at	GRN	granulin	1.053	3.343
200696_s_at	GSN	gelsolin	1.433	5.444
200698_at	KDELR2	KDEL endoplasmic reticulum protein retention receptor 2	1.472	11.468
200701_at	NPC2	NPC intracellular cholesterol transporter 2	1.43	6.579
200704_at	LITAF	lipopolysaccharide induced TNF factor	1.78	10.565
200708_at	GOT2	glutamic-oxaloacetic transaminase 2	-1.282	10.241
200713_s_at	MAPRE1	microtubule associated protein RP/EB family member 1	1.232	12.78
200715_x_at	SNORD32A///SNORD33///SNORD34///SNORD35A///RPL13A	small nucleolar RNA, C/D box 32A///small nucleolar RNA, C/D box 33///small nucleolar RNA, C/D box 34///small nucleolar RNA, C/D box 35A///ribosomal protein L13a	1.191	11.616
200723_s_at	CAPRIN1	cell cycle associated protein 1	1.312	10.1
200750_s_at	RAN	RAN, member RAS oncogene family	1.103	8.11
200751_s_at	HNRNPC	heterogeneous nuclear ribonucleoprotein C (C1/C2)	1.363	8.162
200771_at	LAMC1	laminin subunit gamma 1	1.654	7.774
200782_at	ANXA5	annexin A5	1.958	15.832
200783_s_at	STMN1	stathmin 1	-2.215	17.826
200790_at	ODC1	ornithine decarboxylase 1	2.072	14.682
200791_s_at	IQGAP1	IQ motif containing GTPase activating protein 1	2.03	16.799
200805_at	LMAN2	lectin, mannose binding 2	1.089	6.31
200814_at	PSME1	proteasome activator subunit 1	1.291	8.543
200816_s_at	PAFAH1B1	platelet activating factor acetylhydrolase 1b regulatory subunit 1	-1.055	18.098
200824_at	GSTP1	glutathione S-transferase pi 1	1.336	9.229
200852_x_at	GNB2	G protein subunit beta 2	1.025	12.909
200862_at	DHCR24	24-dehydrocholesterol reductase	-1.91	5.241
200869_at	SNORA68///RPL18A	small nucleolar RNA, H/ACA box 68///ribosomal protein L18a	1.036	6.669
200872_at	S100A10	S100 calcium binding protein A10	2.982	8.538
200885_at	RHOC	ras homolog family member C	1.66	11.056
200891_s_at	SSR1	signal sequence receptor subunit 1	1.15	7.921
200895_s_at	FKBP4	FK506 binding protein 4	-1.067	9.524
200896_x_at	HDGF	hepatoma-derived growth factor	1.294	8.402
200897_s_at	PALLD	palladin, cytoskeletal associated protein	1.31	7.962
200902_at	45184	15 kDa selenoprotein	1.433	12.608
200911_s_at	TACC1	transforming acidic coiled-coil containing protein 1	-1.193	9.784
200913_at	PPM1G	protein phosphatase, Mg2+/Mn2+ dependent 1G	1.002	6.947
200916_at	TAGLN2	transgelin 2	2.965	18.656
200923_at	LGALS3BP	galectin 3 binding protein	2.659	10.271
200924_s_at	SLC3A2	solute carrier family 3 member 2	1.287	9.92
200934_at	DEK	DEK proto-oncogene	1.05	7.502
200942_s_at	HSBP1	heat shock factor binding protein 1	1.364	11.369
200943_at	HMGN1	high mobility group nucleosome binding domain 1	1.693	15.704
200953_s_at	CCND2	cyclin D2	-1.251	1.987
200957_s_at	SSRP1	structure specific recognition protein 1	1.159	10.106
200959_at	FUS	FUS RNA binding protein	1.027	7.75
200967_at	PPIB	peptidylprolyl isomerase B	1.182	12.887
200974_at	ACTA2	actin, alpha 2, smooth muscle, aorta	1.579	4.264
200978_at	MDH1	malate dehydrogenase 1	-1.538	22.214
200986_at	SERPING1	serpin family G member 1	2.645	6.963
200999_s_at	CKAP4	cytoskeleton associated protein 4	1.183	4.206
201004_at	SSR4	signal sequence receptor subunit 4	1.096	7.482
201005_at	CD9	CD9 molecule	2.239	12.129
201011_at	RPN1	ribophorin I	1.36	8.383
201012_at	ANXA1	annexin A1	4.999	20.2
201013_s_at	PAICS	phosphoribosylaminoimidazole carboxylase; phosphoribosylaminoimidazolesuccinocarboxamide synthase	1.368	11.078
201020_at	YWHAH	tyrosine 3-monooxygenase/tryptophan 5-monooxygenase activation protein eta	-2.581	25.378
201029_s_at	CD99	CD99 molecule	1.683	5.87
201040_at	GNAI2	G protein subunit alpha i2	1.177	2.919
201047_x_at	WTH3DI///RAB6A	RAB6C-like///RAB6A, member RAS oncogene family	-1.002	17.083
201050_at	PLD3	phospholipase D family member 3	-1.75	6.738
201053_s_at	PSMF1	proteasome inhibitor subunit 1	1.661	15.085
201063_at	RCN1	reticulocalbin 1	1.85	13.148
201074_at	SMARCC1	SWI/SNF related, matrix associated, actin dependent regulator of chromatin subfamily c member 1	1.073	8.619
201080_at	PIP4K2B	phosphatidylinositol-5-phosphate 4-kinase type 2 beta	-1.371	12.814
201082_s_at	SLC4A5///DCTN1	solute carrier family 4 member 5///dynactin subunit 1	-1.543	5.035
201087_at	PXN	paxillin	1.954	8.461
201089_at	ATP6V1B2	ATPase H+ transporting V1 subunit B2	-1.606	11.684
201095_at	DAP	death associated protein	2.099	11.623
201102_s_at	PFKL	phosphofructokinase, liver type	1.203	3.234
201104_x_at	NBPF25P///NBPF26///NBPF19///NBPF20///NBPF10///NBPF8///NBPF9///NBPF15///NBPF11///NBPF14	neuroblastoma breakpoint family member 25, pseudogene///neuroblastoma breakpoint family member 26///neuroblastoma breakpoint family member 19///neuroblastoma breakpoint family member 20///neuroblastoma breakpoint family member 10///neuroblastoma breakpoint family member 8///neuroblastoma breakpoint family member 9///neuroblastoma breakpoint family member 15///neuroblastoma breakpoint family membe…	1.468	6.927
201105_at	LGALS1	galectin 1	1.46	4.933
201115_at	POLD2	DAN polymerase delta 2, accessory subunit	1.043	5.639
201118_at	PGD	phosphogluconate dehydrogenase	1.124	6.28
201123_s_at	EIF5A	eukaryotic translation initiation factor 5A	2.504	2.295
201125_s_at	ITGB5	integrin subunit beta 5	1.094	4.317
201136_at	PLP2	proteolipid protein 2	4.922	19.604
201137_s_at	HLA-DPB1	major histocompatibility complex, class II, DP beta 1	1.444	2.97
201160_s_at	YBX3	Y-box binding protein 3	1.362	6.817
201162_at	IGFBP7	insulin like growth factor binding protein 7	1.041	4.242
201170_s_at	BHLHE40	basic helix-loop-helix family member e40	1.237	2.637
201180_s_at	GNAI3	G protein subunit alpha i3	1.485	17.058
201189_s_at	ITPR3	inositol 1,4,5-trisphosphate receptor type 3	-1.115	1.579
201201_at	CSTB	cystatin B	1.047	11.008
201202_at	PCNA	proliferating cell nuclear antigen	1.052	5.985
201204_s_at	RRBP1	ribosome binding protein 1	1.217	4.253
201209_at	HDAC1	histone deacetylase 1	1.632	14.003
201236_s_at	BTG2	BTG anti-proliferation factor 2	1.153	3.063
201260_s_at	SYPL1	synaptophysin like 1	1.779	9.442
201264_at	COPE	coatomer protein complex subunit epsilon	1.156	5.494
201270_x_at	NUDCD3	NudC domain containing 3	-1.695	26.237
201278_at	LOC101926921///DAB2	uncharacterized LOC101926921///DAB2, clathrin adaptor protein	2.628	5.811
201287_s_at	SDC1	syndecan 1	1.193	1.597
201290_at	SEC11A	SEC11 homolog A, signal peptidase complex subunit	1.454	18.499
201292_at	TOP2A	topoisomerase (DNA) II alpha	5.462	19.446
201302_at	ANXA4	annexin A4	2.654	14.699
201303_at	EIF4A3	eukaryotic translation initiation factor 4A3	1.033	10.625
201310_s_at	NREP	neuronal regeneration related protein	-1.334	5.458
201313_at	ENO2	enolase 2	-2.149	14.025
201315_x_at	IFITM2	interferon induced transmembrane protein 2	1.444	3.94
201324_at	EMP1	epithelial membrane protein 1	2.38	5.356
201328_at	ETS2	ETS proto-oncogene 2, transcription factor	-1.233	5.279
201341_at	ENC1	ectodermal-neural cortex 1	-3.523	11.192
201368_at	ZFP36L2	ZFP36 ring finger protein like 2	1.861	9.218
201373_at	PLEC	plectin	1.915	4.534
201376_s_at	HNRNPF	heterogeneous nuclear ribonucleoprotein F	2.327	11.037
201387_s_at	UCHL1	ubiquitin C-terminal hydrolase L1	-2.01	8.311
201389_at	ITGA5	integrin subunit alpha 5	1.431	1.663
201397_at	PHGDH	phosphoglycerate dehydrogenase	2.078	12.715
201398_s_at	TRAM1	translocation associated membrane protein 1	1.631	19.264
201410_at	PLEKHB2	pleckstrin homology domain containing B2	-1.585	24.621
201412_at	LRP10	LDL receptor related protein 10	1.784	16.76
201417_at	SOX4	SRY-box 4	1.209	2.76
201419_at	BAP1	BRCA1 associated protein 1	-1.291	9.922
201422_at	IFI30///PIK3R2	IFI30, lysosomal thiol reductase///phosphoinositide-3-kinase regulatory subunit 2	2.468	2.746
201426_s_at	VIM	vimentin	3.084	25.354
201427_s_at	SEPP1	selenoprotein P, plasma, 1	-1.295	2.464
201431_s_at	DPYSL3	dihydropyrimidinase like 3	1.956	10.449
201432_at	CAT	catalase	1.402	10.175
201438_at	COL6A3	collagen type VI alpha 3 chain	3.36	3.299
201445_at	CNN3	calponin 3	1.455	7.43
201459_at	RUVBL2	RuvB like AAA ATPase 2	1.014	4.378
201477_s_at	RRM1	ribonucleotide reductase catalytic subunit M1	1.078	5.966
201487_at	CTSC	cathepsin C	1.011	1.852
201489_at	PPIF	peptidylprolyl isomerase F	1.278	2.721
201494_at	PRCP	prolylcarboxypeptidase	1.549	6.947
201506_at	TGFBI	transforming growth factor beta induced	3.941	5.778
201519_at	TOMM70	translocase of outer mitochondrial membrane 70	-1.166	23.016
201520_s_at	GRSF1	G-rich RNA sequence binding factor 1	1.387	9.144
201522_x_at	SNURF///SNRPN	SNRPN upstream reading frame///small nuclear ribonucleoprotein polypeptide N	-1.642	24.537
201525_at	APOD	apolipoprotein D	-2.399	4.668
201528_at	RPA1	replication protein A1	1.191	10.659
201536_at	DUSP3	dual specificity phosphatase 3	-1.394	12.408
201555_at	MCM3	minichromosome maintenance complex component 3	1.357	8.754
201556_s_at	VAMP2	vesicle associated membrane protein 2	-2.309	9.086
201560_at	CLIC4	chloride intracellular channel 4	1.606	7.029
201561_s_at	CLSTN1	calsyntenin 1	-1.011	8.195
201576_s_at	TMPPE///GLB1	transmembrane protein with metallophosphoesterase domain///galactosidase beta 1	1.272	10.501
201584_s_at	DDX39A	DEAD-box helicase 39A	1.095	5.551
201586_s_at	SFPQ	splicing factor proline and glutamine rich	1.023	6.415
201589_at	SMC1A	structural maintenance of chromosomes 1A	2.114	17.103
201591_s_at	NISCH	nischarin	-1.057	8.944
201594_s_at	PPP4R1	protein phosphatase 4 regulatory subunit 1	2.005	20.036
201598_s_at	INPPL1	inositol polyphosphate phosphatase like 1	1.03	6.233
201612_at	ALDH9A1	aldehyde dehydrogenase 9 family member A1	1.013	10.106
201613_s_at	AP1G2	adaptor related protein complex 1 gamma 2 subunit	-1.676	9.547
201614_s_at	RUVBL1	RuvB like AAA ATPase 1	3.148	13.46
201621_at	NBL1	neuroblastoma 1, DAN family BMP antagonist	-2.936	14.84
201645_at	TNC	tenascin C	4.712	9.465
201655_s_at	HSPG2	heparan sulfate proteoglycan 2	3.36	8.917
201656_at	ITGA6	integrin subunit alpha 6	1.518	4.449
201661_s_at	ACSL3	acyl-CoA synthetase long-chain family member 3	-1.518	16.588
201664_at	SMC4	structural maintenance of chromosomes 4	2.259	11.672
201666_at	TIMP1	TIMP metallopeptidase inhibitor 1	1.983	3.876
201673_s_at	GYS1	glycogen synthase 1	1.267	2.368
201690_s_at	TPD52	tumor protein D52	-1.949	10.974
201703_s_at	PPP1R10	protein phosphatase 1 regulatory subunit 10	1.062	4.258
201704_at	ENTPD6	ectonucleoside triphosphate diphosphohydrolase 6 (putative)	-2.22	23.182
201722_s_at	GALNT1	polypeptide N-acetylgalactosaminyltransferase 1	1.141	5.891
201726_at	ELAVL1	ELAV like RNA binding protein 1	2.353	11.884
201746_at	TP53	tumor protein p53	2.908	8.894
201751_at	JOSD1	Josephin domain containing 1	-1.5	12.674
201760_s_at	WSB2	WD repeat and SOCS box containing 2	-1.392	16.938
201762_s_at	MIR7703///PSME2	microRNA 7703///proteasome activator subunit 2	1.358	12.066
201764_at	TMEM106C	transmembrane protein 106C	1.334	4.567
201774_s_at	NCAPD2	non-SMC condensin I complex subunit D2	1.545	6.045
201783_s_at	RELA	RELA proto-oncogene, NF-kB subunit	1.468	2.838
201784_s_at	C11orf58	chromosome 11 open reading frame 58	1.092	10.033
201785_at	RNASE1	ribonuclease A family member 1, pancreatic	-2.043	4.777
201792_at	AEBP1	AE binding protein 1	2.394	3.015
201795_at	LBR	lamin B receptor	1.522	7.845
201798_s_at	MYOF	myoferlin	3.304	6.575
201801_s_at	SLC29A1	solute carrier family 29 member 1 (Augustine blood group)	2.296	4.867
201811_x_at	SH3BP5	SH3 domain binding protein 5	-2.319	20.061
201818_at	LPCAT1	lysophosphatidylcholine acyltransferase 1	1.185	3.574
201839_s_at	EPCAM	epithelial cell adhesion molecule	-2.795	14.023
201841_s_at	HSPB1	heat shock protein family B (small) member 1	1.489	5.85
201842_s_at	EFEMP1	EGF containing fibulin like extracellular matrix protein 1	1.625	2.099
201850_at	CAPG	capping actin protein, gelsolin like	1.33	2.654
201874_at	MPZL1	myelin protein zero like 1	2.052	7.426
201887_at	IL13RA1	interleukin 13 receptor subunit alpha 1	1.238	5.751
201890_at	RRM2	ribonucleotide reductase regulatory subunit M2	4.89	20.971
201892_s_at	IMPDH2	inosine monophosphate dehydrogenase 2	1.245	8.842
201895_at	ARAF	A-Raf proto-oncogene, serine/threonine kinase	1.179	5.548
201897_s_at	CKS1B	CDC28 protein kinase regulatory subunit 1B	1.678	7.904
201911_s_at	FARP1	FERM, ARH/RhoGEF and pleckstrin domain protein 1	1.138	2.196
201923_at	PRDX4	peroxiredoxin 4	2.174	17.669
201924_at	AFF1	AF4/FMR2 family member 1	1.348	10.601
201928_at	PKP4	plakophilin 4	-1.936	24.081
201952_at	ALCAM	activated leukocyte cell adhesion molecule	-2.492	9.934
201953_at	CIB1	calcium and integrin binding 1	1.244	10.725
201960_s_at	MYCBP2	MYC binding protein 2, E3 ubiquitin protein ligase	-2.301	27.408
201962_s_at	RNF41	ring finger protein 41	-3.177	29.033
201972_at	ATP6V1A	ATPase H+ transporting V1 subunit A	-1.142	17.346
201980_s_at	RSU1	Ras suppressor protein 1	1.013	2.927
201999_s_at	DYNLT1	dynein light chain Tctex-type 1	2.464	21.984
202007_at	NID1	nidogen 1	1.966	4.293
202012_s_at	EXT2	exostosin glycosyltransferase 2	1.271	7.857
202016_at	MEST	mesoderm specific transcript	1.04	1.804
202018_s_at	LTF	lactotransferrin	2.788	2.023
202020_s_at	LANCL1	LanC like 1	-1.899	26.645
202022_at	ALDOC	aldolase, fructose-bisphosphate C	-2.547	10.368
202027_at	TMEM184B	transmembrane protein 184B	-1.455	19.128
202032_s_at	MAN2A2	mannosidase alpha class 2A member 2	-1.733	13.143
202037_s_at	SFRP1	secreted frizzled related protein 1	-2.919	2.432
202042_at	LOC101928623///HARS	uncharacterized LOC101928623///histidyl-tRNA synthetase	-1.023	15.355
202047_s_at	CBX6	chromobox 6	-1.636	9.601
202053_s_at	ALDH3A2	aldehyde dehydrogenase 3 family member A2	1.182	6.759
202073_at	OPTN	optineurin	-1.658	7.455
202075_s_at	PLTP	phospholipid transfer protein	2.968	11.833
202092_s_at	ARL2BP	ADP ribosylation factor like GTPase 2 binding protein	1.154	6.304
202095_s_at	BIRC5	baculoviral IAP repeat containing 5	3.149	16.731
202096_s_at	TSPO	translocator protein	2.422	8.626
202107_s_at	MCM2	minichromosome maintenance complex component 2	3.968	14.083
202111_at	SLC4A2	solute carrier family 4 member 2	2.217	4.206
202113_s_at	SNX2	sorting nexin 2	1.151	5.772
202119_s_at	CPNE3	copine 3	1.144	10.928
202122_s_at	PLIN3	perilipin 3	2.074	13.398
202123_s_at	ABL1	ABL proto-oncogene 1, non-receptor tyrosine kinase	1.232	6.744
202133_at	WWTR1	WW domain containing transcription regulator 1	2.675	11.892
202138_x_at	AIMP2	aminoacyl tRNA synthetase complex interacting multifunctional protein 2	1.099	7.875
202145_at	LY6E	lymphocyte antigen 6 complex, locus E	-1.935	5.087
202149_at	NEDD9	neural precursor cell expressed, developmentally down-regulated 9	1.66	6.038
202157_s_at	CELF2	CUGBP, Elav-like family member 2	-1.072	10.043
202171_at	VEZF1	vascular endothelial zinc finger 1	2.596	20.885
202178_at	PRKCZ	protein kinase C zeta	-4.988	28.006
202185_at	PLOD3	procollagen-lysine,2-oxoglutarate 5-dioxygenase 3	1.224	5.998
202192_s_at	GAS7	growth arrest specific 7	-2.053	12.967
202193_at	LIMK2	LIM domain kinase 2	2.461	5.844
202200_s_at	SRPK1	SRSF protein kinase 1	-1.189	10.927
202202_s_at	LAMA4	laminin subunit alpha 4	1.761	2.749
202207_at	ARL4C	ADP ribosylation factor like GTPase 4C	1.057	3.449
202211_at	ARFGAP3	ADP ribosylation factor GTPase activating protein 3	1.713	9.2
202223_at	STT3A	STT3A, catalytic subunit of the oligosaccharyltransferase complex	2.518	6.89
202228_s_at	NPTN	neuroplastin	-1.222	14.882
202236_s_at	SLC16A1	solute carrier family 16 member 1	1.3	4.556
202237_at	LOC101928916///NNMT	uncharacterized LOC101928916///nicotinamide N-methyltransferase	3.524	2.104
202239_at	PARP4	poly(ADP-ribose) polymerase family member 4	1.557	11.473
202242_at	TSPAN7	tetraspanin 7	-1.377	6.315
202246_s_at	CDK4	cyclin dependent kinase 4	1.921	11.758
202252_at	RAB13	RAB13, member RAS oncogene family	1.766	13.223
202253_s_at	DNM2	dynamin 2	1.063	3.116
202260_s_at	STXBP1	syntaxin binding protein 1	-3.401	37.863
202270_at	GBP1	guanylate binding protein 1	3.885	5.49
202274_at	ACTG2	actin, gamma 2, smooth muscle, enteric	1.59	3.578
202282_at	HSD17B10	hydroxysteroid 17-beta dehydrogenase 10	1.721	12.77
202283_at	SERPINF1	serpin family F member 1	-2.441	5.656
202284_s_at	CDKN1A	cyclin dependent kinase inhibitor 1A	1.047	3.011
202290_at	PDAP1	PDGFA associated protein 1	1.326	4.949
202291_s_at	MGP	matrix Gla protein	1.699	2.445
202295_s_at	CTSH	cathepsin H	1.595	2.987
202304_at	FNDC3A	fibronectin type III domain containing 3A	1.204	5.973
202307_s_at	TAP1	transporter 1, ATP binding cassette subfamily B member	1.117	3.97
202308_at	SREBF1	sterol regulatory element binding transcription factor 1	1.474	2.82
202328_s_at	LOC101930075///PKD1	polycystin-1-like///polycystin 1, transient receptor potential channel interacting	-1.032	2.464
202340_x_at	NR4A1	nuclear receptor subfamily 4 group A member 1	-1.197	2.176
202350_s_at	LOC100506558///MATN2	uncharacterized LOC100506558///matrilin 2	2.596	4.131
202357_s_at	CFB	complement factor B	5.698	9.932
202363_at	SPOCK1	sparc/osteonectin, cwcv and kazal-like domains proteoglycan (testican) 1	-5.138	19.786
202365_at	UNC119B	unc-119 lipid binding chaperone B	2.425	18.794
202369_s_at	TRAM2	translocation associated membrane protein 2	3.052	12.37
202376_at	SERPINA3	serpin family A member 3	3.392	3.381
202381_at	ADAM9	ADAM metallopeptidase domain 9	1.525	7.17
202388_at	RGS2	regulator of G-protein signaling 2	-1.794	6.162
202390_s_at	HTT	huntingtin	-2.947	26.7
202391_at	BASP1	brain abundant membrane attached signal protein 1	-2.124	12.358
202392_s_at	MIR7109///PISD	microRNA 7109///phosphatidylserine decarboxylase	-1.182	8.86
202393_s_at	KLF10	Kruppel like factor 10	2.099	7.319
202394_s_at	ABCF3	ATP binding cassette subfamily F member 3	-1.068	6.727
202395_at	LOC101930324///NSF	uncharacterized LOC101930324///N-ethylmaleimide sensitive factor, vesicle fusing ATPase	-3.407	44.129
202403_s_at	COL1A2	collagen type I alpha 2 chain	2.03	4.907
202409_at	INS-IGF2///IGF2	INS-IGF2 readthrough///insulin like growth factor 2	6.458	7.487
202418_at	YIF1A	Yip1 interacting factor homolog A, membrane trafficking protein	1.226	7.613
202421_at	IGSF3	immunoglobulin superfamily member 3	1.448	3.929
202429_s_at	PPP3CA	protein phosphatase 3 catalytic subunit alpha	-2.02	13.185
202431_s_at	MYC	v-myc avian myelocytomatosis viral oncogene homolog	2.655	6.405
202432_at	PPP3CB	protein phosphatase 3 catalytic subunit beta	-2.115	23.521
202440_s_at	ST5	suppression of tumorigenicity 5	2.186	13.519
202446_s_at	PLSCR1	phospholipid scramblase 1	2.192	4.585
202447_at	DECR1	2,4-dienoyl-CoA reductase 1, mitochondrial	1.275	8.498
202449_s_at	RXRA	retinoid X receptor alpha	1.068	3.987
202452_at	ZER1	zyg-11 related cell cycle regulator	-1.471	8.79
202455_at	HDAC5	histone deacetylase 5	-1.944	19.998
202458_at	PRSS23	protease, serine 23	1.381	1.716
202465_at	PCOLCE	procollagen C-endopeptidase enhancer	1.865	5.395
202468_s_at	CTNNAL1	catenin alpha like 1	1.743	12.052
202478_at	TRIB2	tribbles pseudokinase 2	-1.032	3.337
202481_at	DHRS3	dehydrogenase/reductase 3	1.423	3.027
202484_s_at	MBD2	methyl-CpG binding domain protein 2	1.21	8.79
202492_at	ATG9A	autophagy related 9A	-1.111	5.912
202499_s_at	SLC2A3	solute carrier family 2 member 3	-3.064	8.808
202501_at	MAPRE2	microtubule associated protein RP/EB family member 2	-1.78	16.126
202503_s_at	KIAA0101	KIAA0101	5.474	25.978
202504_at	TRIM29	tripartite motif containing 29	4.439	20.471
202508_s_at	SNAP25	synaptosome associated protein 25	-7.06	27.732
202510_s_at	TNFAIP2	TNF alpha induced protein 2	1.884	4.058
202513_s_at	PPP2R5D	protein phosphatase 2 regulatory subunit B'delta	-1.126	13.872
202517_at	CRMP1	collapsin response mediator protein 1	-1.951	7.71
202522_at	PITPNB	phosphatidylinositol transfer protein beta	-1.238	14.363
202527_s_at	SMAD4	SMAD family member 4	1.274	4.64
202531_at	IRF1	interferon regulatory factor 1	2.267	3.771
202534_x_at	DHFR	dihydrofolate reductase	1.789	10.727
202541_at	AIMP1	aminoacyl tRNA synthetase complex interacting multifunctional protein 1	1.154	8.328
202546_at	VAMP8	vesicle associated membrane protein 8	1.803	6.523
202567_at	SNRPD3	small nuclear ribonucleoprotein D3 polypeptide	1.158	11.129
202580_x_at	FOXM1	forkhead box M1	2.029	10.649
202587_s_at	AK1	adenylate kinase 1	3.259	6.665
202589_at	TYMS	thymidylate synthetase	3.623	6.048
202591_s_at	SSBP1	single stranded DNA binding protein 1	1.092	12.828
202605_at	GUSB	glucuronidase beta	1.222	7.037
202609_at	EPS8	epidermal growth factor receptor pathway substrate 8	1.089	9.43
202610_s_at	MED14	mediator complex subunit 14	1.025	7.562
202615_at	GNAQ	G protein subunit alpha q	-1.047	8.836
202620_s_at	PLOD2	procollagen-lysine,2-oxoglutarate 5-dioxygenase 2	1.582	5.326
202627_s_at	SERPINE1	serpin family E member 1	2.958	3.348
202637_s_at	ICAM1	intercellular adhesion molecule 1	2.611	5.575
202644_s_at	TNFAIP3	TNF alpha induced protein 3	4.024	9.056
202652_at	APBB1	amyloid beta precursor protein binding family B member 1	-1.645	15.869
202655_at	MANF	mesencephalic astrocyte derived neurotrophic factor	1.006	5.586
202666_s_at	ACTL6A	actin like 6A	2.625	6.819
202670_at	MAP2K1	mitogen-activated protein kinase kinase 1	-1.626	14.168
202679_at	NPC1	NPC intracellular cholesterol transporter 1	-1.157	5.14
202683_s_at	RNMT	RNA guanine-7 methyltransferase	-1.095	12.225
202688_at	TNFSF10	tumor necrosis factor superfamily member 10	2.811	8.163
202701_at	BMP1	bone morphogenetic protein 1	1.426	5.653
202704_at	TOB1	transducer of ERBB2, 1	1.299	5.044
202705_at	CCNB2	cyclin B2	3.749	14.906
202706_s_at	UMPS	uridine monophosphate synthetase	1.403	14.378
202708_s_at	HIST2H2BE	histone cluster 2, H2be	-1.104	1.852
202712_s_at	CKMT1A///CKMT1B	creatine kinase, mitochondrial 1A///creatine kinase, mitochondrial 1B	-7.531	22.775
202713_s_at	KIAA0391///PSMA6	KIAA0391///proteasome subunit alpha 6	1.317	13.899
202718_at	IGFBP2	insulin like growth factor binding protein 2	2.745	4.441
202726_at	LIG1	DNA ligase 1	1.146	3.956
202729_s_at	LTBP1	latent transforming growth factor beta binding protein 1	2.967	13.955
202733_at	LOC101927705///P4HA2	uncharacterized LOC101927705///prolyl 4-hydroxylase subunit alpha 2	1.379	5.818
202734_at	TRIP10	thyroid hormone receptor interactor 10	1.417	2.535
202740_at	ABHD14A-ACY1///ACY1	ABHD14A-ACY1 readthrough///aminoacylase 1	1.48	8.815
202741_at	PRKACB	protein kinase cAMP-activated catalytic subunit beta	-1.87	29.959
202744_at	SLC20A2	solute carrier family 20 member 2	1.634	5.296
202748_at	GBP2	guanylate binding protein 2	1.774	1.887
202754_at	R3HDM1	R3H domain containing 1	-2.613	15.037
202758_s_at	RFXANK	regulatory factor X associated ankyrin containing protein	1.64	12.326
202761_s_at	SYNE2	spectrin repeat containing nuclear envelope protein 2	1.763	4.925
202762_at	ROCK2	Rho associated coiled-coil containing protein kinase 2	-1.44	12.834
202766_s_at	FBN1	fibrillin 1	2.45	7.222
202769_at	CCNG2	cyclin G2	-1.375	7.788
202780_at	OXCT1	3-oxoacid CoA-transferase 1	-1.982	22.2
202786_at	STK39	serine/threonine kinase 39	-1.446	11.594
202788_at	MAPKAPK3	mitogen-activated protein kinase-activated protein kinase 3	2.32	9.05
202793_at	LPCAT3	lysophosphatidylcholine acyltransferase 3	1.847	8.645
202794_at	INPP1	inositol polyphosphate-1-phosphatase	-1.429	9.643
202803_s_at	ITGB2	integrin subunit beta 2	1.499	2.643
202804_at	ABCC1	ATP binding cassette subfamily C member 1	1.718	12.261
202806_at	DBN1	drebrin 1	1.02	4.394
202817_s_at	SS18	SS18, nBAF chromatin remodeling complex subunit	2.295	8.933
202825_at	SLC25A4	solute carrier family 25 member 4	-1.133	10.521
202828_s_at	MMP14	matrix metallopeptidase 14	1.197	3.819
202846_s_at	PIGC	phosphatidylinositol glycan anchor biosynthesis class C	1.304	10.281
202853_s_at	RYK	receptor-like tyrosine kinase	1.719	10.682
202854_at	HPRT1	hypoxanthine phosphoribosyltransferase 1	-1.948	13.465
202859_x_at	CXCL8	C-X-C motif chemokine ligand 8	3.888	8.396
202860_at	DENND4B	DENN domain containing 4B	-1.815	19.012
202862_at	FAH	fumarylacetoacetate hydrolase	1.038	3.682
202864_s_at	SP100	SP100 nuclear antigen	2.204	5.694
202870_s_at	CDC20	cell division cycle 20	2.041	5.144
202878_s_at	CD93	CD93 molecule	3.329	6.306
202887_s_at	DDIT4	DNA damage inducible transcript 4	1.908	6.066
202913_at	ARHGEF11	Rho guanine nucleotide exchange factor 11	-1.222	7.707
202920_at	ANK2	ankyrin 2, neuronal	-1.505	10.795
202925_s_at	PLAGL2	PLAG1 like zinc finger 2	1.02	4.762
202927_at	PIN1	peptidylprolyl cis/trans isomerase, NIMA-interacting 1	-1.739	21.004
202930_s_at	SUCLA2	succinate-CoA ligase ADP-forming beta subunit	-1.035	7.66
202933_s_at	YES1	YES proto-oncogene 1, Src family tyrosine kinase	1.597	9.737
202934_at	HK2	hexokinase 2	2.649	4.493
202936_s_at	SOX9	SRY-box 9	1.534	15.515
202939_at	ZMPSTE24	zinc metallopeptidase STE24	1.297	16.361
202945_at	FPGS	folylpolyglutamate synthase	1.392	9.486
202946_s_at	BTBD3	BTB domain containing 3	-2.045	17.913
202949_s_at	FHL2	four and a half LIM domains 2	-1.423	2.948
202950_at	CRYZ	crystallin zeta	1.756	4.655
202954_at	UBE2C	ubiquitin conjugating enzyme E2 C	3.296	6.207
202962_at	KIF13B	kinesin family member 13B	1.467	3.63
202969_at	DYRK2	dual specificity tyrosine phosphorylation regulated kinase 2	1.583	4.351
202974_at	MPP1	membrane palmitoylated protein 1	-1.549	11.925
202990_at	PYGL	phosphorylase, glycogen, liver	1.559	4.567
202994_s_at	FBLN1	fibulin 1	2.663	6.011
202998_s_at	LOXL2	lysyl oxidase like 2	1.407	1.916
203000_at	STMN2	stathmin 2	-8.714	30.441
203010_at	STAT5A	signal transducer and activator of transcription 5A	1.415	6.087
203017_s_at	SSX2IP	SSX family member 2 interacting protein	-1.149	3.752
203020_at	RABGAP1L	RAB GTPase activating protein 1 like	-2.239	28.755
203021_at	SLPI	secretory leukocyte peptidase inhibitor	2.536	5.756
203022_at	RNASEH2A	ribonuclease H2 subunit A	2.842	16.413
203024_s_at	C5orf15	chromosome 5 open reading frame 15	1.252	15.808
203028_s_at	CYBA	cytochrome b-245 alpha chain	2.612	5.705
203029_s_at	PTPRN2	protein tyrosine phosphatase, receptor type N2	-1.652	8.571
203031_s_at	UROS	uroporphyrinogen III synthase	-1.969	17.222
203040_s_at	HMBS	hydroxymethylbilane synthase	1.741	12.034
203043_at	ZBED1	zinc finger BED-type containing 1	1.028	6.528
203044_at	CHSY1	chondroitin sulfate synthase 1	1.412	6.896
203045_at	NINJ1	ninjurin 1	1.305	7.11
203046_s_at	TIMELESS	timeless circadian clock	1.524	4.128
203057_s_at	PRDM2	PR/SET domain 2	1.239	6.718
203062_s_at	MDC1	mediator of DNA damage checkpoint 1	1.211	9.687
203066_at	CHST15	carbohydrate (N-acetylgalactosamine 4-sulfate 6-O) sulfotransferase 15	1.118	2.669
203069_at	SV2A	synaptic vesicle glycoprotein 2A	-3.793	31.204
203072_at	MYO1E	myosin IE	2.487	19.402
203083_at	THBS2	thrombospondin 2	-1.268	2.608
203085_s_at	TGFB1	transforming growth factor beta 1	1.295	1.721
203088_at	FBLN5	fibulin 5	3.366	4.029
203097_s_at	RAPGEF2	Rap guanine nucleotide exchange factor 2	-1.199	9.869
203098_at	CDYL	chromodomain Y-like	1.308	9.436
203110_at	PTK2B	protein tyrosine kinase 2 beta	-2.361	11.588
203130_s_at	KIF5C	kinesin family member 5C	-2.687	25.922
203132_at	RB1	RB transcriptional corepressor 1	1.285	7.642
203138_at	HAT1	histone acetyltransferase 1	1.943	27.798
203142_s_at	AP3B1	adaptor related protein complex 3 beta 1 subunit	1.548	9.857
203146_s_at	GABBR1	gamma-aminobutyric acid type B receptor subunit 1	-4.091	22.315
203148_s_at	TRIM14	tripartite motif containing 14	2.047	3.408
203151_at	MAP1A	microtubule associated protein 1A	-3.232	26.478
203155_at	SETDB1	SET domain bifurcated 1	1.156	5.798
203184_at	FBN2	fibrillin 2	4.157	19.908
203186_s_at	S100A4	S100 calcium binding protein A4	3.131	5.689
203196_at	ABCC4	ATP binding cassette subfamily C member 4	2.684	11.069
203213_at	CDK1	cyclin dependent kinase 1	4.824	14.15
203217_s_at	ST3GAL5	ST3 beta-galactoside alpha-2,3-sialyltransferase 5	-2.013	15.214
203218_at	MAPK9	mitogen-activated protein kinase 9	-1.772	24.725
203224_at	RFK	riboflavin kinase	-1.079	7.925
203240_at	FCGBP	Fc fragment of IgG binding protein	3.542	4.498
203245_s_at	LINC00094	long intergenic non-protein coding RNA 94	1.05	7.024
203249_at	EZH1	enhancer of zeste 1 polycomb repressive complex 2 subunit	-1.263	12.385
203254_s_at	TLN1	talin 1	1.78	2.939
203256_at	CDH3	cadherin 3	-1.1	2.073
203264_s_at	ARHGEF9	Cdc42 guanine nucleotide exchange factor 9	-1.836	15.249
203266_s_at	MAP2K4	mitogen-activated protein kinase kinase 4	-1.864	26.532
203267_s_at	DRG2	developmentally regulated GTP binding protein 2	1.485	6.045
203273_s_at	TUSC2	tumor suppressor candidate 2	-1.028	7.313
203274_at	F8A3///F8A2///F8A1	coagulation factor VIII-associated 3///coagulation factor VIII-associated 2///coagulation factor VIII-associated 1	-1.425	10.056
203276_at	LMNB1	lamin B1	1.844	2.912
203281_s_at	MIR5193///UBA7	microRNA 5193///ubiquitin like modifier activating enzyme 7	1.813	6.286
203284_s_at	HS2ST1	heparan sulfate 2-O-sulfotransferase 1	1.142	7.653
203286_at	RNF44	ring finger protein 44	-1.516	15.022
203290_at	HLA-DQA1	major histocompatibility complex, class II, DQ alpha 1	1.858	5.195
203303_at	DYNLT3	dynein light chain Tctex-type 3	-1.154	8.105
203310_at	STXBP3	syntaxin binding protein 3	1.088	2.925
203313_s_at	TGIF1	TGFB induced factor homeobox 1	4.386	22.8
203316_s_at	SNRPE	small nuclear ribonucleoprotein polypeptide E	1.083	10.551
203325_s_at	COL5A1	collagen type V alpha 1 chain	3.474	8.746
203340_s_at	SLC25A12	solute carrier family 25 member 12	-1.361	10.754
203343_at	UGDH	UDP-glucose 6-dehydrogenase	1.198	3.275
203344_s_at	RBBP8	RB binding protein 8, endonuclease	1.72	7.3
203349_s_at	ETV5	ETS variant 5	-2.972	14.407
203356_at	CAPN7	calpain 7	1.057	7.206
203358_s_at	EZH2	enhancer of zeste 2 polycomb repressive complex 2 subunit	3.98	20.525
203359_s_at	GJA9-MYCBP///MYCBP	GJA9-MYCBP readthrough///MYC binding protein	3.767	13.5
203360_s_at	GJA9-MYCBP///GJA9///MYCBP	GJA9-MYCBP readthrough///gap junction protein alpha 9///MYC binding protein	3.567	11.319
203362_s_at	MAD2L1	MAD2 mitotic arrest deficient-like 1 (yeast)	1.772	3.669
203364_s_at	ATG13	autophagy related 13	-1.057	7.706
203365_s_at	MMP15	matrix metallopeptidase 15	-1.033	2.592
203368_at	CRELD1	cysteine rich with EGF like domains 1	-1.864	12.653
203373_at	SOCS2	suppressor of cytokine signaling 2	3.244	5.997
203388_at	ARRB2	arrestin beta 2	-1.049	2.232
203389_at	KIF3C	kinesin family member 3C	-5.057	38.189
203395_s_at	HES1	hes family bHLH transcription factor 1	4.027	18.355
203397_s_at	GALNT3	polypeptide N-acetylgalactosaminyltransferase 3	5.828	19.074
203401_at	PRPS2	phosphoribosyl pyrophosphate synthetase 2	-1.24	3.887
203402_at	KCNAB2	potassium voltage-gated channel subfamily A regulatory beta subunit 2	-5.119	36.865
203408_s_at	SATB1	SATB homeobox 1	-2.267	8.804
203409_at	DDB2	damage specific DNA binding protein 2	1.248	2.682
203410_at	AP3M2	adaptor related protein complex 3 mu 2 subunit	-1.259	12.344
203411_s_at	LMNA	lamin A/C	2.015	9.602
203413_at	NELL2	neural EGFL like 2	-3.822	8.906
203414_at	MMD	monocyte to macrophage differentiation associated	-1.679	9.6
203416_at	CD53	CD53 molecule	1.012	1.695
203417_at	MFAP2	microfibrillar associated protein 2	5.586	16.615
203421_at	TP53I11	tumor protein p53 inducible protein 11	-1.557	10.722
203423_at	RBP1	retinol binding protein 1	3.327	8.973
203429_s_at	SUCO	SUN domain containing ossification factor	1.755	14.401
203430_at	HEBP2	heme binding protein 2	1.329	7.976
203438_at	STC2	stanniocalcin 2	2.592	9.016
203450_at	CBY1	chibby family member 1, beta catenin antagonist	1.527	5.763
203474_at	IQGAP2	IQ motif containing GTPase activating protein 2	6.091	17.612
203476_at	TPBG	trophoblast glycoprotein	1.818	2.855
203485_at	RTN1	reticulon 1	-1.25	9.152
203487_s_at	ARMC8	armadillo repeat containing 8	-1.018	7.24
203497_at	MED1	mediator complex subunit 1	1.234	8.937
203498_at	RCAN2	regulator of calcineurin 2	-5.388	27.154
203501_at	CPQ	carboxypeptidase Q	1.656	8.138
203505_at	ABCA1	ATP binding cassette subfamily A member 1	1.348	5.734
203511_s_at	TRAPPC3	trafficking protein particle complex 3	1.059	7.077
203513_at	SPG11	spastic paraplegia 11 (autosomal recessive)	1.078	10.286
203522_at	CCS	copper chaperone for superoxide dismutase	-2.106	5.54
203545_at	ALG8	ALG8, alpha-1,3-glucosyltransferase	1.042	8.944
203550_s_at	FAM189B	family with sequence similarity 189 member B	-1.166	8.616
203556_at	ZHX2	zinc fingers and homeoboxes 2	1.918	9.21
203560_at	GGH	gamma-glutamyl hydrolase	1.893	7.245
203564_at	FANCG	Fanconi anemia complementation group G	1.012	2.452
203569_s_at	OFD1	OFD1, centriole and centriolar satellite protein	1.15	5.691
203570_at	LOXL1	lysyl oxidase like 1	2.623	7.379
203580_s_at	SLC7A6	solute carrier family 7 member 6	-1.127	3.936
203585_at	ZNF185	zinc finger protein 185 (LIM domain)	2.998	5.314
203593_at	CD2AP	CD2 associated protein	1.505	7.588
203604_at	ZNF516	zinc finger protein 516	1.493	4.697
203607_at	INPP5F	inositol polyphosphate-5-phosphatase F	-3.716	31.087
203617_x_at	ELK1	ELK1, ETS transcription factor	-1.336	12.573
203619_s_at	FAIM2	Fas apoptotic inhibitory molecule 2	-3.964	11.129
203623_at	PLXNA3	plexin A3	1.285	2.993
203625_x_at	SKP2	S-phase kinase-associated protein 2, E3 ubiquitin protein ligase	1.145	5.543
203640_at	MBNL2	muscleblind like splicing regulator 2	-1.142	10.62
203642_s_at	COBLL1	cordon-bleu WH2 repeat protein like 1	1.542	4.392
203643_at	ERF	ETS2 repressor factor	1.27	4.511
203645_s_at	CD163	CD163 molecule	1.736	1.881
203647_s_at	FDX1	ferredoxin 1	1.223	12.868
203650_at	PROCR	protein C receptor	1.046	2.937
203656_at	FIG4	FIG4 phosphoinositide 5-phosphatase	-1.391	9.59
203665_at	HMOX1	heme oxygenase 1	2.1	2.554
203671_at	TPMT	thiopurine S-methyltransferase	-1.991	22.224
203675_at	NUCB2	nucleobindin 2	1.438	14.057
203679_at	TMED1	transmembrane p24 trafficking protein 1	1.501	11.087
203680_at	PRKAR2B	protein kinase cAMP-dependent type II regulatory subunit beta	-2.805	17.562
203685_at	BCL2	BCL2, apoptosis regulator	1.014	3.186
203697_at	FRZB	frizzled-related protein	3.516	4.465
203700_s_at	DIO2	deiodinase, iodothyronine, type II	-3.948	11.266
203702_s_at	TTLL4	tubulin tyrosine ligase like 4	3.557	17.791
203704_s_at	RREB1	ras responsive element binding protein 1	2.93	20.793
203706_s_at	FZD7	frizzled class receptor 7	2.407	9.904
203708_at	PDE4B	phosphodiesterase 4B	-1.247	5.842
203710_at	ITPR1	inositol 1,4,5-trisphosphate receptor type 1	-2.495	11.127
203723_at	ITPKB	inositol-trisphosphate 3-kinase B	1.641	7.141
203729_at	EMP3	epithelial membrane protein 3	4.352	9.254
203732_at	TRIP4	thyroid hormone receptor interactor 4	1.2	10.357
203739_at	ZNF217	zinc finger protein 217	3.465	12.451
203749_s_at	RARA	retinoic acid receptor alpha	1.57	6.367
203755_at	BUB1B	BUB1 mitotic checkpoint serine/threonine kinase B	3.533	16.486
203758_at	CTSO	cathepsin O	1.853	6.724
203763_at	DYNC2LI1	dynein cytoplasmic 2 light intermediate chain 1	1.106	5.303
203764_at	DLGAP5	DLG associated protein 5	3.122	17.621
203766_s_at	LMOD1	leiomodin 1	2.012	3.821
203767_s_at	STS	steroid sulfatase (microsomal), isozyme S	-1.25	3.807
203775_at	SLC25A13	solute carrier family 25 member 13	1.918	9.238
203782_s_at	POLRMT	RNA polymerase mitochondrial	-1.116	8.233
203786_s_at	TPD52L1	tumor protein D52-like 1	-2.433	8.011
203794_at	CDC42BPA	CDC42 binding protein kinase alpha	-1.102	12.374
203795_s_at	BCL7A	BCL tumor suppressor 7A	-2.04	9.222
203797_at	VSNL1	visinin like 1	-7.179	27.5
203801_at	MRPS14	mitochondrial ribosomal protein S14	1.36	11.772
203812_at	SLIT3	slit guidance ligand 3	-2.277	7.748
203815_at	GSTT1	glutathione S-transferase theta 1	-1.574	1.671
203817_at	GUCY1B3	guanylate cyclase 1 soluble subunit beta	-4.116	26.806
203820_s_at	IGF2BP3	insulin like growth factor 2 mRNA binding protein 3	3.936	13.552
203823_at	RGS3	regulator of G-protein signaling 3	1.112	2.382
203826_s_at	PITPNM1	phosphatidylinositol transfer protein membrane associated 1	-1.485	4.769
203829_at	ELP4	elongator acetyltransferase complex subunit 4	1.022	7.122
203831_at	R3HDM2	R3H domain containing 2	-1.532	16.749
203832_at	SNRPF	small nuclear ribonucleoprotein polypeptide F	1.408	11.656
203837_at	MAP3K5	mitogen-activated protein kinase kinase kinase 5	-1.375	5.043
203839_s_at	TNK2	tyrosine kinase non receptor 2	-1.568	5.496
203842_s_at	MAPRE3	microtubule associated protein RP/EB family member 3	-1.261	9.667
203845_at	KAT2B	lysine acetyltransferase 2B	-1.275	5.144
203851_at	IGFBP6	insulin like growth factor binding protein 6	-1.337	3.183
203852_s_at	SMN2///SMN1	survival of motor neuron 2, centromeric///survival of motor neuron 1, telomeric	1.015	2.341
203854_at	CFI	complement factor I	7.053	26.427
203855_at	WDR47	WD repeat domain 47	-1.995	22.168
203857_s_at	MIR7110///PDIA5	microRNA 7110///protein disulfide isomerase family A member 5	5.32	25.891
203862_s_at	ACTN2	actinin alpha 2	-2.339	10.048
203865_s_at	ADARB1	adenosine deaminase, RNA specific B1	-1.757	7.65
203868_s_at	VCAM1	vascular cell adhesion molecule 1	3.98	3.779
203870_at	USP46	ubiquitin specific peptidase 46	-1.177	4.843
203879_at	PIK3CD	phosphatidylinositol-4,5-bisphosphate 3-kinase catalytic subunit delta	-1.493	3.223
203882_at	IRF9	interferon regulatory factor 9	1.268	3.853
203883_s_at	RAB11FIP2	RAB11 family interacting protein 2	-1.48	13.134
203886_s_at	FBLN2	fibulin 2	2.078	3.328
203889_at	SCG5	secretogranin V	-5.877	19.918
203894_at	TUBG2	tubulin gamma 2	-2.596	22.646
203895_at	PLCB4	phospholipase C beta 4	-1.69	6.526
203904_x_at	CD82	CD82 molecule	1.357	4.414
203906_at	IQSEC1	IQ motif and Sec7 domain 1	-1.858	13.943
203908_at	SLC4A4	solute carrier family 4 member 4	-1.271	1.974
203909_at	SLC9A6	solute carrier family 9 member A6	-1.512	16.212
203911_at	RAP1GAP	RAP1 GTPase activating protein	-2.804	9.342
203920_at	NR1H3	nuclear receptor subfamily 1 group H member 3	1.274	5.057
203921_at	CHST2	carbohydrate sulfotransferase 2	-1.852	12.573
203923_s_at	CYBB	cytochrome b-245 beta chain	1.541	2.076
203925_at	GCLM	glutamate-cysteine ligase modifier subunit	1.529	7.523
203929_s_at	MAPT	microtubule associated protein tau	-2.554	14.095
203932_at	HLA-DMB	major histocompatibility complex, class II, DM beta	1.027	1.963
203933_at	RAB11FIP3	RAB11 family interacting protein 3	-1.061	3.914
203934_at	KDR	kinase insert domain receptor	1.752	4.033
203935_at	ACVR1	activin A receptor type 1	1.05	6.043
203936_s_at	MMP9	matrix metallopeptidase 9	2.43	9.116
203939_at	NT5E	5'-nucleotidase ecto	-1.84	4.074
203941_at	INTS9	integrator complex subunit 9	1.083	6.476
203946_s_at	ARG2	arginase 2	-3.478	16.479
203950_s_at	CLCN6	chloride voltage-gated channel 6	-1.627	11.719
203957_at	E2F6	E2F transcription factor 6	1.021	5.492
203964_at	NMI	N-myc and STAT interactor	2.891	13.921
203965_at	USP20	ubiquitin specific peptidase 20	-1.576	7.833
203978_at	NUBP1	nucleotide binding protein 1	1.694	12.727
203979_at	CYP27A1	cytochrome P450 family 27 subfamily A member 1	1.19	3.901
203986_at	FAM47E-STBD1///FAM47E///STBD1	FAM47E-STBD1 readthrough///family with sequence similarity 47 member E///starch binding domain 1	-1.333	2.534
203987_at	FZD6	frizzled class receptor 6	5.07	19.354
203989_x_at	F2R	coagulation factor II thrombin receptor	4.85	11.664
203999_at	SYT1	synaptotagmin 1	-7.253	32.261
204000_at	GNB5	G protein subunit beta 5	-2.586	19.376
204006_s_at	FCGR3B///FCGR3A	Fc fragment of IgG receptor IIIb///Fc fragment of IgG receptor IIIa	2.399	4.362
204012_s_at	LCMT2	leucine carboxyl methyltransferase 2	1.286	8.422
204017_at	KDELR3	KDEL endoplasmic reticulum protein retention receptor 3	2.788	13.48
204026_s_at	ZWINT	ZW10 interacting kinetochore protein	1.412	1.891
204035_at	SCG2	secretogranin II	-2.133	2.873
204040_at	RNF144A	ring finger protein 144A	-1.639	6.214
204041_at	MAOB	monoamine oxidase B	1.563	6.329
204042_at	WASF3	WAS protein family member 3	-1.319	9.801
204051_s_at	SFRP4	secreted frizzled related protein 4	4.06	14.5
204059_s_at	ME1	malic enzyme 1	-4.699	18.537
204060_s_at	PRKY///PRKX	protein kinase, Y-linked, pseudogene///protein kinase, X-linked	1.483	4.206
204061_at	PRKX	protein kinase, X-linked	1.583	2.89
204066_s_at	AGAP1	ArfGAP with GTPase domain, ankyrin repeat and PH domain 1	-1.264	4.894
204068_at	STK3	serine/threonine kinase 3	1.146	6.935
204069_at	MEIS1	Meis homeobox 1	2.587	3.953
204070_at	RARRES3	retinoic acid receptor responder 3	2.752	5.603
204072_s_at	FRY	FRY microtubule binding protein	-2.946	15.543
204073_s_at	MYRF	myelin regulatory factor	-3.223	5.682
204076_at	ENTPD4	ectonucleoside triphosphate diphosphohydrolase 4	-2.903	35.85
204078_at	P3H4	prolyl 3-hydroxylase family member 4 (non-enzymatic)	1.332	5.265
204081_at	NRGN	neurogranin	-6.532	17.984
204082_at	PBX3	PBX homeobox 3	3.142	11.504
204088_at	P2RX4	purinergic receptor P2X 4	1.363	4.124
204103_at	CCL4	C-C motif chemokine ligand 4	2.733	10.145
204105_s_at	NRCAM	neuronal cell adhesion molecule	-1.911	7.268
204106_at	TESK1	testis-specific kinase 1	-1.084	8.258
204112_s_at	HNMT	histamine N-methyltransferase	1.561	3.02
204114_at	NID2	nidogen 2	4.457	15.13
204115_at	GNG11	G protein subunit gamma 11	1.604	3.428
204117_at	PREP	prolyl endopeptidase	-1.037	6.829
204118_at	CD48	CD48 molecule	1.061	5.482
204121_at	GADD45G	growth arrest and DNA damage inducible gamma	1.566	1.993
204134_at	PDE2A	phosphodiesterase 2A	-4.445	7.347
204135_at	FILIP1L	filamin A interacting protein 1 like	2.495	4.688
204141_at	TUBB2A	tubulin beta 2A class IIa	-1.142	11.633
204146_at	RAD51AP1	RAD51 associated protein 1	1.962	7.846
204149_s_at	GSTM4	glutathione S-transferase mu 4	1.369	3.253
204151_x_at	AKR1C1	aldo-keto reductase family 1 member C1	-1.391	1.636
204153_s_at	MFNG	MFNG O-fucosylpeptide 3-beta-N-acetylglucosaminyltransferase	1.611	6.804
204158_s_at	TCIRG1	T-cell immune regulator 1, ATPase H+ transporting V0 subunit a3	1.13	1.931
204162_at	NDC80	NDC80, kinetochore complex component	3.486	17.996
204163_at	EMILIN1	elastin microfibril interfacer 1	1.72	4.983
204165_at	WASF1	WAS protein family member 1	-2.903	15.358
204168_at	MGST2	microsomal glutathione S-transferase 2	1.155	4.237
204169_at	IMPDH1	inosine monophosphate dehydrogenase 1	-1.087	3.996
204172_at	CPOX	coproporphyrinogen oxidase	-1.103	6.447
204174_at	ALOX5AP	arachidonate 5-lipoxygenase activating protein	1.571	2.198
204187_at	GMPR	guanosine monophosphate reductase	5.826	8.902
204198_s_at	RUNX3	runt related transcription factor 3	1.652	4.174
204199_at	RALGPS1	Ral GEF with PH domain and SH3 binding motif 1	-1.342	11.14
204202_at	IQCE	IQ motif containing E	1.152	4.355
204204_at	SLC31A2	solute carrier family 31 member 2	-1.853	7.387
204205_at	APOBEC3G	apolipoprotein B mRNA editing enzyme catalytic subunit 3G	1.239	2.231
204212_at	ACOT8	acyl-CoA thioesterase 8	-1.157	6.916
204214_s_at	RAB32	RAB32, member RAS oncogene family	1.641	5.244
204218_at	ANAPC15	anaphase promoting complex subunit 15	-1.362	6.729
204223_at	PRELP	proline and arginine rich end leucine rich repeat protein	2.089	3.456
204230_s_at	SLC17A7	solute carrier family 17 member 7	-5.557	15.345
204231_s_at	FAAH	fatty acid amide hydrolase	-2.641	21.069
204237_at	GULP1	GULP, engulfment adaptor PTB domain containing 1	-1.785	4.074
204238_s_at	DNPH1	2'-deoxynucleoside 5'-phosphate N-hydrolase 1	1.776	7.758
204247_s_at	CDK5	cyclin dependent kinase 5	-2.24	18.601
204249_s_at	LMO2	LIM domain only 2	1.011	2.494
204252_at	CDK2	cyclin dependent kinase 2	3.974	18.271
204254_s_at	VDR	vitamin D (1,25- dihydroxyvitamin D3) receptor	1.74	4.634
204256_at	ELOVL6	ELOVL fatty acid elongase 6	-1.229	6.436
204259_at	MMP7	matrix metallopeptidase 7	1.379	4.539
204260_at	CHGB	chromogranin B	-6.303	22.182
204268_at	S100A2	S100 calcium binding protein A2	3.685	16.43
204273_at	EDNRB	endothelin receptor type B	1.3	2.431
204279_at	PSMB9	proteasome subunit beta 9	3.971	12.715
204283_at	FARS2	phenylalanyl-tRNA synthetase 2, mitochondrial	1.332	7.548
204284_at	PPP1R3C	protein phosphatase 1 regulatory subunit 3C	-1.507	4.83
204285_s_at	PMAIP1	phorbol-12-myristate-13-acetate-induced protein 1	1.875	4.171
204287_at	SYNGR1	synaptogyrin 1	-3.859	29.164
204297_at	PIK3C3	phosphatidylinositol 3-kinase catalytic subunit type 3	1.465	4.457
204300_at	GATB	glutamyl-tRNA amidotransferase subunit B	-1.165	3.369
204303_s_at	CTIF	cap binding complex dependent translation initiation factor	-3.181	24.977
204304_s_at	PROM1	prominin 1	4.32	8.919
204305_at	MIPEP	mitochondrial intermediate peptidase	3.112	14.427
204306_s_at	CD151	CD151 molecule (Raph blood group)	1.754	7.447
204308_s_at	TECPR2	tectonin beta-propeller repeat containing 2	-1.159	6.874
204309_at	CYP11A1	cytochrome P450 family 11 subfamily A member 1	1.254	4.885
204311_at	ATP1B2	ATPase Na+/K+ transporting subunit beta 2	-1.085	4.45
204333_s_at	AGA	aspartylglucosaminidase	1.789	8.305
204337_at	RGS4	regulator of G-protein signaling 4	-5.614	10.544
204340_at	TMEM187	transmembrane protein 187	1.433	7.669
204342_at	SLC25A24	solute carrier family 25 member 24	1.422	4.375
204343_at	ABCA3	ATP binding cassette subfamily A member 3	-1.501	12.526
204354_at	POT1	protection of telomeres 1	1.378	11.799
204357_s_at	LIMK1	LIM domain kinase 1	-1.651	2.551
204359_at	LOC100506718///FLRT2	uncharacterized LOC100506718///fibronectin leucine rich transmembrane protein 2	-3.031	6.628
204360_s_at	NAGLU	N-acetyl-alpha-glucosaminidase	1.032	4.657
204375_at	CLSTN3	calsyntenin 3	-3.411	20.943
204378_at	BCAS1	breast carcinoma amplified sequence 1	-3.384	12.128
204381_at	LRP3	LDL receptor related protein 3	-2.068	19.938
204392_at	CAMK1	calcium/calmodulin dependent protein kinase I	-3.622	20.982
204398_s_at	EML2	echinoderm microtubule associated protein like 2	-1.083	5.173
204400_at	EFS	embryonal Fyn-associated substrate	1.828	4.118
204411_at	KIF21B	kinesin family member 21B	-2.087	5.183
204419_x_at	HBG2///HBG1	hemoglobin subunit gamma 2///hemoglobin subunit gamma 1	-5.294	16.557
204428_s_at	LCAT	lecithin-cholesterol acyltransferase	2.913	3.56
204434_at	SPATA2	spermatogenesis associated 2	-1.249	6.997
204435_at	NUP58	nucleoporin 58	-1.792	7.13
204437_s_at	FOLR1	folate receptor 1	6.678	42.309
204438_at	MRC1	mannose receptor, C type 1	-1.398	2.813
204439_at	IFI44L	interferon induced protein 44 like	3.06	2.951
204444_at	KIF11	kinesin family member 11	3.847	19.901
204447_at	LZTS3	leucine zipper tumor suppressor family member 3	-2.812	26.347
204451_at	FZD1	frizzled class receptor 1	1.756	7.616
204454_at	LDOC1	leucine zipper down-regulated in cancer 1	-4.697	15.945
204457_s_at	GAS1	growth arrest specific 1	1.966	3.933
204458_at	PLA2G15	phospholipase A2 group XV	-1.473	7.959
204462_s_at	SLC16A2	solute carrier family 16 member 2	1.779	5.728
204464_s_at	EDNRA	endothelin receptor type A	1.565	3.498
204465_s_at	INA	internexin neuronal intermediate filament protein alpha	-8.942	24.386
204466_s_at	SNCA	synuclein alpha	-2.261	12.282
204470_at	CXCL1	C-X-C motif chemokine ligand 1	2.488	3.648
204471_at	GAP43	growth associated protein 43	-3.922	14.637
204472_at	GEM	GTP binding protein overexpressed in skeletal muscle	4.099	12.664
204476_s_at	PC	pyruvate carboxylase	-1.233	6.548
204479_at	OSTF1	osteoclast stimulating factor 1	-1.624	4.669
204484_at	PIK3C2B	phosphatidylinositol-4-phosphate 3-kinase catalytic subunit type 2 beta	-2.026	8.952
204485_s_at	TOM1L1	target of myb1 like 1 membrane trafficking protein	2.526	6.546
204488_at	DOLK	dolichol kinase	1.613	10.014
204497_at	ADCY9	adenylate cyclase 9	-1.806	10.948
204500_s_at	AGTPBP1	ATP/GTP binding protein 1	-1.494	15.788
204505_s_at	DMTN	dematin actin binding protein	-3.658	20.703
204506_at	PPP3R1	protein phosphatase 3 regulatory subunit B, alpha	-3.242	8.606
204513_s_at	ELMO1	engulfment and cell motility 1	-4.926	34.532
204517_at	PPIC	peptidylprolyl isomerase C	3.57	6.376
204519_s_at	PLLP	plasmolipin	-3.773	15.101
204521_at	FAM216A	family with sequence similarity 216 member A	-1.852	11.202
204526_s_at	TBC1D8	TBC1 domain family member 8	-2.289	6.586
204529_s_at	TOX	thymocyte selection associated high mobility group box	-1.278	2.282
204531_s_at	BRCA1	BRCA1, DNA repair associated	1.498	8.836
204533_at	CXCL10	C-X-C motif chemokine ligand 10	2.315	8.829
204540_at	EEF1A2	eukaryotic translation elongation factor 1 alpha 2	-5.055	18.048
204542_at	ST6GALNAC2	ST6 N-acetylgalactosaminide alpha-2,6-sialyltransferase 2	4.687	20.385
204544_at	HPS5	HPS5, biogenesis of lysosomal organelles complex 2 subunit 2	1.032	5.768
204546_at	KIAA0513	KIAA0513	-4.034	39.441
204547_at	RAB40B	RAB40B, member RAS oncogene family	-2.17	21.329
204548_at	STAR	steroidogenic acute regulatory protein	-2.118	5.086
204559_s_at	LSM7	LSM7 homolog, U6 small nuclear RNA and mRNA degradation associated	1.007	3.826
204570_at	COX7A1	cytochrome c oxidase subunit 7A1	-4.198	18.775
204573_at	CROT	carnitine O-octanoyltransferase	1.085	6.244
204578_at	PPIP5K1	diphosphoinositol pentakisphosphate kinase 1	-2.348	13.06
204584_at	L1CAM	L1 cell adhesion molecule	-5.727	13.342
204586_at	BSN	bassoon presynaptic cytomatrix protein	-6.384	12.142
204588_s_at	SLC7A7	solute carrier family 7 member 7	1.403	4.62
204589_at	NUAK1	NUAK family kinase 1	-1.869	12.638
204591_at	CHL1	cell adhesion molecule L1 like	-2.823	8.606
204592_at	DLG4	discs large MAGUK scaffold protein 4	-3.769	26.482
204600_at	EPHB3	EPH receptor B3	-1.375	7.235
204604_at	CDK14	cyclin dependent kinase 14	-1.081	9.835
204610_s_at	CCDC85B	coiled-coil domain containing 85B	-1.425	10.192
204611_s_at	PPP2R5B	protein phosphatase 2 regulatory subunit B'beta	-1.308	16.527
204620_s_at	VCAN	versican	2.787	5.143
204632_at	RPS6KA4	ribosomal protein S6 kinase A4	-1.474	12.131
204634_at	NEK4	NIMA related kinase 4	1.196	4.813
204646_at	DPYD	dihydropyrimidine dehydrogenase	1.98	2.224
204648_at	NPR1	natriuretic peptide receptor 1	-1.066	5.056
204649_at	TROAP	trophinin associated protein	1.741	7.738
204650_s_at	MIR6831///APBB3	microRNA 6831///amyloid beta precursor protein binding family B member 3	-1.299	7.174
204662_at	CCP110	centriolar coiled-coil protein 110	-1.058	4.668
204663_at	ME3	malic enzyme 3	-1.819	9.175
204669_s_at	RNF24	ring finger protein 24	-1.503	2.529
204670_x_at	LOC100996809///HLA-DRB4///HLA-DRB1	HLA class II histocompatibility antigen, DRB1-10 beta chain-like///major histocompatibility complex, class II, DR beta 4///major histocompatibility complex, class II, DR beta 1	2.037	3.632
204679_at	KCNK1	potassium two pore domain channel subfamily K member 1	-5.974	23.401
204681_s_at	RAPGEF5	Rap guanine nucleotide exchange factor 5	-5.186	32.534
204684_at	NPTX1	neuronal pentraxin 1	-4.741	14.549
204685_s_at	ATP2B2	ATPase plasma membrane Ca2+ transporting 2	-3.51	18.272
204697_s_at	CHGA	chromogranin A	-5.195	16.145
204699_s_at	DIEXF	digestive organ expansion factor homolog (zebrafish)	1.364	7.255
204703_at	IFT88	intraflagellar transport 88	2.349	11.58
204709_s_at	KIF23	kinesin family member 23	1.602	8.639
204714_s_at	F5	coagulation factor V	2.272	5.212
204717_s_at	SLC29A2	solute carrier family 29 member 2	-1.255	2.589
204718_at	EPHB6	EPH receptor B6	-4.146	25.534
204719_at	ABCA8	ATP binding cassette subfamily A member 8	1.326	2.151
204720_s_at	DNAJC6	DnaJ heat shock protein family (Hsp40) member C6	-6.056	35.438
204723_at	SCN3B	sodium voltage-gated channel beta subunit 3	-8.052	19.737
204726_at	CDH13	cadherin 13	-1.919	3.403
204729_s_at	STX1A	syntaxin 1A	-6.029	29.582
204730_at	RIMS3	regulating synaptic membrane exocytosis 3	-5.824	29.03
204732_s_at	TRIM23	tripartite motif containing 23	-1.173	4.396
204733_at	KLK6	kallikrein related peptidase 6	-4.025	5.245
204735_at	PDE4A	phosphodiesterase 4A	-2.134	14.384
204736_s_at	CSPG4	chondroitin sulfate proteoglycan 4	1.386	2.215
204737_s_at	MYH7///MYH6	myosin, heavy chain 7, cardiac muscle, beta///myosin heavy chain 6	1.84	7.611
204740_at	CNKSR1	connector enhancer of kinase suppressor of Ras 1	-1.351	12.731
204743_at	TAGLN3	transgelin 3	-3.933	25.725
204746_s_at	PICK1	protein interacting with PRKCA 1	-1.792	3.77
204749_at	NAP1L3	nucleosome assembly protein 1 like 3	-2.368	19.395
204753_s_at	HLF	HLF, PAR bZIP transcription factor	-4.882	18.211
204757_s_at	C2CD2L	C2CD2 like	-2.235	23.101
204759_at	RCBTB2	RCC1 and BTB domain containing protein 2	1.438	8.431
204761_at	USP6NL	USP6 N-terminal like	1.632	9.166
204773_at	IL11RA	interleukin 11 receptor subunit alpha	2.08	2.246
204774_at	EVI2A	ecotropic viral integration site 2A	-2.142	7.381
204777_s_at	MAL	mal, T-cell differentiation protein	-5.935	23.169
204780_s_at	FAS	Fas cell surface death receptor	4.165	9.311
204784_s_at	MLF1	myeloid leukemia factor 1	2.754	11.983
204788_s_at	PPOX	protoporphyrinogen oxidase	1.202	4.119
204791_at	NR2C1	nuclear receptor subfamily 2 group C member 1	1.008	3.746
204792_s_at	IFT140	intraflagellar transport 140	2.044	9.834
204793_at	GPRASP1	G protein-coupled receptor associated sorting protein 1	-2.937	19.639
204794_at	DUSP2	dual specificity phosphatase 2	-1.48	5.367
204797_s_at	EML1	echinoderm microtubule associated protein like 1	1.558	9.281
204798_at	MYB	MYB proto-oncogene, transcription factor	1.076	3.509
204799_at	ZBED4	zinc finger BED-type containing 4	1.698	7.666
204800_s_at	DHRS12	dehydrogenase/reductase 12	1.679	7.805
204803_s_at	RRAD	RRAD, Ras related glycolysis inhibitor and calcium channel regulator	2.178	3.332
204804_at	TRIM21	tripartite motif containing 21	1.07	6.217
204811_s_at	CACNA2D2	calcium voltage-gated channel auxiliary subunit alpha2delta 2	-1.401	3.425
204820_s_at	BTN3A2///BTN3A3	butyrophilin subfamily 3 member A2///butyrophilin subfamily 3 member A3	1.768	6.421
204822_at	TTK	TTK protein kinase	2.646	15.764
204823_at	NAV3	neuron navigator 3	-2.666	14.294
204825_at	MELK	maternal embryonic leucine zipper kinase	3.689	17.077
204826_at	CCNF	cyclin F	-1.603	7.708
204835_at	POLA1	DNA polymerase alpha 1, catalytic subunit	1.934	9.331
204839_at	POP5	POP5 homolog, ribonuclease P/MRP subunit	1.265	9.559
204844_at	ENPEP	glutamyl aminopeptidase	2.5	6.056
204850_s_at	DCX	doublecortin	-2.613	4.048
204865_at	CA3	carbonic anhydrase 3	5.478	11.338
204866_at	JADE3	jade family PHD finger 3	1.276	4.637
204869_at	PCSK2	proprotein convertase subtilisin/kexin type 2	-5.621	23.122
204874_x_at	BAIAP3	BAI1 associated protein 3	2.343	5.063
204889_s_at	NEURL1	neuralized E3 ubiquitin protein ligase 1	-2.666	10.551
204893_s_at	ZFYVE9	zinc finger FYVE-type containing 9	-1.153	6.231
204900_x_at	SAP30	Sin3A associated protein 30	1.115	4.812
204914_s_at	SOX11	SRY-box 11	1.445	1.598
204916_at	RAMP1	receptor activity modifying protein 1	-1.129	2.232
204919_at	PRH1-PRR4///PRR4	PRH1-PRR4 readthrough///proline rich 4 (lacrimal)	-1.876	11.951
204920_at	CPS1	carbamoyl-phosphate synthase 1	2.075	5.947
204924_at	TLR2	toll like receptor 2	1.445	2.624
204929_s_at	VAMP5	vesicle associated membrane protein 5	1.685	5.151
204932_at	TNFRSF11B	TNF receptor superfamily member 11b	6.099	8.84
204936_at	MAP4K2	mitogen-activated protein kinase kinase kinase kinase 2	-1.255	2.089
204939_s_at	PLN	phospholamban	4.19	9.487
204945_at	PTPRN	protein tyrosine phosphatase, receptor type N	-4.15	20.908
204949_at	ICAM3	intercellular adhesion molecule 3	1.033	2.56
204953_at	SNAP91	synaptosome associated protein 91	-4.632	25.632
204955_at	SRPX	sushi repeat containing protein, X-linked	-1.853	2.495
204957_at	ORC5	origin recognition complex subunit 5	-1.103	6.206
204959_at	MNDA	myeloid cell nuclear differentiation antigen	1.387	2.172
204962_s_at	SLC35F6///CENPA	solute carrier family 35 member F6///centromere protein A	2.587	11.865
204966_at	ADGRB2	adhesion G protein-coupled receptor B2	-1.267	6.282
204967_at	SHROOM2	shroom family member 2	-2.057	4.591
204970_s_at	MAFG	MAF bZIP transcription factor G	-1.822	7.233
204971_at	CSTA	cystatin A	2.308	6.531
204972_at	OAS2	2'-5'-oligoadenylate synthetase 2	2.227	6.337
204973_at	GJB1	gap junction protein beta 1	-1.447	4.937
204974_at	RAB3A	RAB3A, member RAS oncogene family	-4.772	30.543
204984_at	GPC4	glypican 4	4.518	16.518
204990_s_at	ITGB4	integrin subunit beta 4	4.056	4.547
204993_at	GNAZ	G protein subunit alpha z	-1.434	10.644
204995_at	CDK5R1	cyclin dependent kinase 5 regulatory subunit 1	-4.364	21.202
205000_at	DDX3Y	DEAD-box helicase 3, Y-linked	-2.051	1.597
205003_at	DOCK4	dedicator of cytokinesis 4	-2.188	13.345
205004_at	NKRF	NFKB repressing factor	-1.569	29.278
205012_s_at	HAGH	hydroxyacylglutathione hydrolase	-1.598	16.9
205016_at	TGFA	transforming growth factor alpha	-2.247	4.549
205019_s_at	VIPR1	vasoactive intestinal peptide receptor 1	-3.614	2.254
205020_s_at	ARL4A	ADP ribosylation factor like GTPase 4A	1.78	5.893
205024_s_at	RAD51	RAD51 recombinase	1.393	9.434
205027_s_at	MAP3K8	mitogen-activated protein kinase kinase kinase 8	1.498	3.83
205031_at	EFNB3	ephrin B3	2.233	2.071
205047_s_at	ASNS	asparagine synthetase (glutamine-hydrolyzing)	-2.014	12.514
205048_s_at	PSPH	phosphoserine phosphatase	2.064	1.689
205050_s_at	MAPK8IP2	mitogen-activated protein kinase 8 interacting protein 2	-2.609	22.385
205051_s_at	KIT	KIT proto-oncogene receptor tyrosine kinase	-2.784	10.915
205052_at	AUH	AU RNA binding methylglutaconyl-CoA hydratase	-1.54	10.454
205059_s_at	IDUA	iduronidase, alpha-L-	1.44	4.029
205066_s_at	ENPP1	ectonucleotide pyrophosphatase/phosphodiesterase 1	1.193	3.788
205067_at	IL1B	interleukin 1 beta	2.534	9.812
205073_at	CYP2J2	cytochrome P450 family 2 subfamily J member 2	-4.423	10.883
205074_at	SLC22A5	solute carrier family 22 member 5	1.163	4.712
205076_s_at	MTMR11	myotubularin related protein 11	3.017	10.744
205081_at	CRIP1	cysteine rich protein 1	2.792	8.713
205083_at	AOX1	aldehyde oxidase 1	2.061	7.018
205088_at	MAMLD1	mastermind like domain containing 1	1.081	2.85
205090_s_at	NAGPA	N-acetylglucosamine-1-phosphodiester alpha-N-acetylglucosaminidase	-2.509	16.18
205094_at	PEX12	peroxisomal biogenesis factor 12	1.305	10.483
205098_at	CCR1	C-C motif chemokine receptor 1	1.517	2.323
205103_at	C1orf61	chromosome 1 open reading frame 61	-2.283	8.63
205104_at	SNPH	syntaphilin	-3.172	20.282
205107_s_at	EFNA4	ephrin A4	1.028	3.72
205109_s_at	LOC101930241///ARHGEF4	rho guanine nucleotide exchange factor 4-like///Rho guanine nucleotide exchange factor 4	-2.009	11.92
205110_s_at	FGF13	fibroblast growth factor 13	-2.95	7.088
205112_at	PLCE1	phospholipase C epsilon 1	3.759	12.973
205113_at	NEFM	neurofilament, medium polypeptide	-9.061	38.143
205114_s_at	CCL3L3///CCL3L1///CCL3	C-C motif chemokine ligand 3 like 3///C-C motif chemokine ligand 3 like 1///C-C motif chemokine ligand 3	4.211	14.894
205117_at	FGF1	fibroblast growth factor 1	-2.493	5.631
205125_at	PLCD1	phospholipase C delta 1	1.703	5.599
205126_at	VRK2	vaccinia related kinase 2	1.505	6.038
205130_at	MOK	MOK protein kinase	2.736	9.086
205140_at	FPGT	fucose-1-phosphate guanylyltransferase	1.638	6.845
205141_at	ANG	angiogenin	2.396	15.352
205150_s_at	TRIL	TLR4 interactor with leucine rich repeats	1.202	2.721
205152_at	SLC6A1	solute carrier family 6 member 1	-2.39	11.327
205154_at	LRRN2	leucine rich repeat neuronal 2	2.194	3.553
205155_s_at	SPTBN2	spectrin beta, non-erythrocytic 2	-3.739	21.692
205157_s_at	KRT17///JUP	keratin 17///junction plakoglobin	-1.159	7.556
205160_at	PEX11A	peroxisomal biogenesis factor 11 alpha	2.388	9.053
205162_at	ERCC8	ERCC excision repair 8, CSA ubiquitin ligase complex subunit	1.43	7.138
205164_at	GCAT	glycine C-acetyltransferase	-1.745	9.974
205171_at	PTPN4	protein tyrosine phosphatase, non-receptor type 4	-1.876	9.825
205173_x_at	CD58	CD58 molecule	2.346	14.555
205182_s_at	ZNF324	zinc finger protein 324	-1.588	12.007
205190_at	PLS1	plastin 1	-3.111	4.034
205191_at	RP2	retinitis pigmentosa 2 (X-linked recessive)	2.732	5.983
205198_s_at	ATP7A	ATPase copper transporting alpha	1.326	9.456
205199_at	CA9	carbonic anhydrase 9	1.927	3.38
205200_at	EXOSC7///CLEC3B	exosome component 7///C-type lectin domain family 3 member B	2.933	3.938
205204_at	NMB	neuromedin B	2.809	9.528
205207_at	IL6	interleukin 6	1.817	4.881
205208_at	ALDH1L1	aldehyde dehydrogenase 1 family member L1	1.456	2.154
205216_s_at	APOH	apolipoprotein H	3	11.883
205230_at	RPH3A	rabphilin 3A	-7.371	26.158
205234_at	SLC16A4	solute carrier family 16 member 4	3.744	8.726
205236_x_at	SOD3	superoxide dismutase 3, extracellular	1.833	6.469
205245_at	PARD6A	par-6 family cell polarity regulator alpha	-2.079	13.226
205248_at	DOPEY2	dopey family member 2	-1.756	8.524
205255_x_at	TCF7	transcription factor 7 (T-cell specific, HMG-box)	1.132	4.735
205257_s_at	AMPH	amphiphysin	-4.84	23.827
205258_at	INHBB	inhibin beta B subunit	2.858	4.433
205266_at	LIF	leukemia inhibitory factor	1.34	2.912
205267_at	POU2AF1	POU class 2 associating factor 1	2.045	7.811
205269_at	LCP2	lymphocyte cytosolic protein 2	1.214	2.463
205273_s_at	PITRM1	pitrilysin metallopeptidase 1	-1.02	13.381
205278_at	GAD1	glutamate decarboxylase 1	-8.304	25.415
205280_at	GLRB	glycine receptor beta	-2.621	9.694
205289_at	BMP2	bone morphogenetic protein 2	2.985	4.615
205294_at	BAIAP2	BAI1 associated protein 2	-3	12.431
205295_at	CKMT2	creatine kinase, mitochondrial 2	-1.147	3.786
205296_at	RBL1	RB transcriptional corepressor like 1	1.37	7.593
205298_s_at	BTN2A2	butyrophilin subfamily 2 member A2	2.204	13.028
205302_at	IGFBP1	insulin like growth factor binding protein 1	1.487	4.827
205303_at	KCNJ8	potassium voltage-gated channel subfamily J member 8	1.291	4.737
205325_at	PHYHIP	phytanoyl-CoA 2-hydroxylase interacting protein	-4.242	19.959
205334_at	S100A1	S100 calcium binding protein A1	-2.917	11.507
205336_at	PVALB	parvalbumin	-7.196	12.033
205337_at	DCT	dopachrome tautomerase	2.299	5.77
205339_at	STIL	SCL/TAL1 interrupting locus	1.391	5.926
205345_at	BARD1	BRCA1 associated RING domain 1	1.18	2.706
205347_s_at	TMSB15B///TMSB15A	thymosin beta 15B///thymosin beta 15a	3.333	5.501
205348_s_at	DYNC1I1	dynein cytoplasmic 1 intermediate chain 1	-4.521	19.583
205352_at	SERPINI1	serpin family I member 1	-4.357	17.885
205358_at	GRIA2	glutamate ionotropic receptor AMPA type subunit 2	-7.055	24.383
205359_at	AKAP6	A-kinase anchoring protein 6	-5.299	22.521
205363_at	BBOX1	gamma-butyrobetaine hydroxylase 1	1.844	4.251
205364_at	ACOX2	acyl-CoA oxidase 2	2.926	12.806
205368_at	FAM131B	family with sequence similarity 131 member B	-6.029	34.677
205372_at	PLAG1	PLAG1 zinc finger	2.458	6
205373_at	CTNNA2	catenin alpha 2	-1.169	3.432
205374_at	SLN	sarcolipin	-3.594	1.956
205375_at	MDFI	MyoD family inhibitor	1.1	3.113
205378_s_at	ACHE	acetylcholinesterase (Cartwright blood group)	-2.405	7.477
205381_at	LRRC17	leucine rich repeat containing 17	1.652	3.88
205383_s_at	ZBTB20	zinc finger and BTB domain containing 20	1.031	3.374
205394_at	CHEK1	checkpoint kinase 1	2.311	13.301
205395_s_at	MRE11A	MRE11 homolog A, double strand break repair nuclease	2.376	11.645
205403_at	IL1R2	interleukin 1 receptor type 2	1.306	2.685
205406_s_at	SPA17	sperm autoantigenic protein 17	3.644	8.927
205413_at	MPPED2	metallophosphoesterase domain containing 2	-1.701	2.322
205414_s_at	ARHGAP44	Rho GTPase activating protein 44	-5.031	29.904
205419_at	GPR183	G protein-coupled receptor 183	1.375	3.733
205422_s_at	ITGBL1	integrin subunit beta like 1	2.027	5.717
205428_s_at	CALB2	calbindin 2	-4.749	18.399
205430_at	BMP5	bone morphogenetic protein 5	4.22	12.829
205433_at	BCHE	butyrylcholinesterase	-2.847	4.233
205440_s_at	NPY1R	neuropeptide Y receptor Y1	-2.183	2.335
205443_at	SNAPC1	small nuclear RNA activating complex polypeptide 1	2.215	11.405
205448_s_at	MAP3K12	mitogen-activated protein kinase kinase kinase 12	-1.367	8.953
205452_at	PIGB	phosphatidylinositol glycan anchor biosynthesis class B	1.411	11.061
205453_at	HOXB2	homeobox B2	3.243	3.863
205454_at	HPCA	hippocalcin	-5.064	24.206
205464_at	SCNN1B	sodium channel epithelial 1 beta subunit	1.317	5.284
205466_s_at	HS3ST1	heparan sulfate-glucosamine 3-sulfotransferase 1	-2.288	3.735
205475_at	SCRG1	stimulator of chondrogenesis 1	-1.971	3.102
205476_at	CCL20	C-C motif chemokine ligand 20	1.84	4.657
205479_s_at	PLAU	plasminogen activator, urokinase	1.781	5.22
205481_at	ADORA1	adenosine A1 receptor	-3.002	13.986
205483_s_at	ISG15	ISG15 ubiquitin-like modifier	1.404	1.829
205485_at	RYR1	ryanodine receptor 1	-2.61	2.788
205486_at	TESK2	testis-specific kinase 2	-1.128	1.807
205489_at	CRYM	crystallin mu	-5.577	5.316
205496_at	KIAA0408	KIAA0408	-3.798	20.766
205499_at	SRPX2	sushi repeat containing protein, X-linked 2	2.119	10.616
205500_at	C5	complement component 5	2.84	14.653
205501_at	PDE10A	phosphodiesterase 10A	-2.547	7.275
205508_at	SCN1B	sodium voltage-gated channel beta subunit 1	-4.717	36.022
205514_at	ZNF415	zinc finger protein 415	-1.072	9.156
205521_at	EXOG	endo/exonuclease (5'-3'), endonuclease G-like	-1.454	5.876
205522_at	HOXD4	homeobox D4	2.496	4.37
205526_s_at	KATNA1	katanin catalytic subunit A1	2.009	6.379
205542_at	STEAP1	six transmembrane epithelial antigen of the prostate 1	1.291	2.46
205549_at	PCP4	Purkinje cell protein 4	-2.191	3.363
205551_at	SV2B	synaptic vesicle glycoprotein 2B	-9.178	17.345
205552_s_at	OAS1	2'-5'-oligoadenylate synthetase 1	1.936	4.536
205562_at	RPP38	ribonuclease P/MRP subunit p38	1.839	12.655
205567_at	CHST1	carbohydrate sulfotransferase 1	-1.83	4.322
205571_at	LIPT1	lipoyltransferase 1	1.055	6.388
205578_at	ROR2	receptor tyrosine kinase like orphan receptor 2	6.053	32.126
205586_x_at	VGF	VGF nerve growth factor inducible	-2.062	7.947
205590_at	RASGRP1	RAS guanyl releasing protein 1	-5.176	15.488
205609_at	ANGPT1	angiopoietin 1	5.387	12.312
205611_at	TNFSF12-TNFSF13///TNFSF12	TNFSF12-TNFSF13 readthrough///tumor necrosis factor superfamily member 12	-1.03	7.55
205612_at	MMRN1	multimerin 1	3.325	12.824
205622_at	SMPD2	sphingomyelin phosphodiesterase 2	1.754	5.572
205623_at	ALDH3A1	aldehyde dehydrogenase 3 family member A1	1.678	5.231
205626_s_at	CALB1	calbindin 1	-2.05	3.066
205630_at	CRH	corticotropin releasing hormone	-5.163	4.422
205632_s_at	PIP5K1B	phosphatidylinositol-4-phosphate 5-kinase type 1 beta	-4.865	20.072
205637_s_at	SH3GL3	SH3 domain containing GRB2 like 3, endophilin A3	-4.422	14.788
205638_at	ADGRB3	adhesion G protein-coupled receptor B3	-4.867	17.799
205642_at	CNTRL	centriolin	2.633	11.471
205644_s_at	SNRPG	small nuclear ribonucleoprotein polypeptide G	1.375	18.074
205646_s_at	PAX6	paired box 6	2.292	11.734
205651_x_at	RAPGEF4	Rap guanine nucleotide exchange factor 4	-4.965	21.565
205652_s_at	TTLL1	tubulin tyrosine ligase like 1	1.201	6.695
205654_at	C4BPA	complement component 4 binding protein alpha	1.057	1.932
205659_at	HDAC9	histone deacetylase 9	-1.285	5.314
205664_at	KIN	Kin17 DNA and RNA binding protein	1.146	5.709
205666_at	FMO1	flavin containing monooxygenase 1	6.022	26.622
205667_at	WRN	Werner syndrome RecQ like helicase	1.205	5.204
205668_at	LY75	lymphocyte antigen 75	1.482	3.312
205675_at	MTTP	microsomal triglyceride transfer protein	2.602	14.246
205677_s_at	DLEU1	deleted in lymphocytic leukemia 1	1.831	8.281
205678_at	AP3B2	adaptor related protein complex 3 beta 2 subunit	-5.403	31.453
205681_at	BCL2A1	BCL2 related protein A1	1.696	3.052
205691_at	SYNGR3	synaptogyrin 3	-6.97	34.792
205695_at	SDS	serine dehydratase	-1.969	2.666
205697_at	SCGN	secretagogin, EF-hand calcium binding protein	-1.256	1.829
205698_s_at	MAP2K6	mitogen-activated protein kinase kinase 6	1.211	2.4
205708_s_at	TRPM2	transient receptor potential cation channel subfamily M member 2	-2.648	8.111
205709_s_at	CDS1	CDP-diacylglycerol synthase 1	-1.388	2.645
205713_s_at	COMP	cartilage oligomeric matrix protein	1.269	2.115
205714_s_at	ZMYND10	zinc finger MYND-type containing 10	5.472	15.127
205719_s_at	LOC101929036///PAH	uncharacterized LOC101929036///phenylalanine hydroxylase	-2.261	3.601
205728_at	TENM1	teneurin transmembrane protein 1	-4.254	13.353
205730_s_at	ABLIM3	actin binding LIM protein family member 3	-1.985	6.514
205736_at	PGAM2	phosphoglycerate mutase 2	2.796	2.776
205737_at	KCNQ2	potassium voltage-gated channel subfamily Q member 2	-7.403	18.135
205744_at	DOC2A	double C2 domain alpha	-2.704	3.435
205751_at	SH3GL2	SH3 domain containing GRB2 like 2, endophilin A1	-7.166	24.737
205761_s_at	DUS4L	dihydrouridine synthase 4 like	1.415	9.321
205766_at	TCAP	titin-cap	-1.24	3.138
205773_at	CPEB3	cytoplasmic polyadenylation element binding protein 3	-1.875	6.469
205794_s_at	NOVA1	NOVA alternative splicing regulator 1	-1.064	8.269
205807_s_at	TUFT1	tuftelin 1	-1.558	13.273
205814_at	GRM3	glutamate metabotropic receptor 3	-5.996	22.236
205818_at	BRINP1	BMP/retinoic acid inducible neural specific 1	-7.515	30.119
205825_at	PCSK1	proprotein convertase subtilisin/kexin type 1	-4.733	10.877
205827_at	CCK	cholecystokinin	-6.683	9.557
205830_at	CLGN	calmegin	1.417	2.508
205839_s_at	TSPOAP1	TSPO associated protein 1	-1.168	3.783
205851_at	NME6	NME/NM23 nucleoside diphosphate kinase 6	2.366	16.038
205852_at	CDK5R2	cyclin dependent kinase 5 regulatory subunit 2	-6.161	36.422
205874_at	ITPKA	inositol-trisphosphate 3-kinase A	-5.134	8.499
205875_s_at	ATRIP///TREX1	ATR interacting protein///three prime repair exonuclease 1	1.887	6.75
205878_at	POU6F1	POU class 6 homeobox 1	-1.665	13.697
205880_at	PRKD1	protein kinase D1	2.087	13.129
205883_at	ZBTB16	zinc finger and BTB domain containing 16	-1.733	4.048
205890_s_at	UBD///GABBR1	ubiquitin D///gamma-aminobutyric acid type B receptor subunit 1	2.071	6.484
205893_at	NLGN1	neuroligin 1	-1.136	2.496
205896_at	SLC22A4	solute carrier family 22 member 4	2.33	5.498
205899_at	CCNA1	cyclin A1	1.719	1.991
205901_at	PNOC	prepronociceptin	-4.106	2.422
205902_at	KCNN3	potassium calcium-activated channel subfamily N member 3	1.438	2.16
205904_at	MICA	MHC class I polypeptide-related sequence A	1.468	5.84
205906_at	FOXJ1	forkhead box J1	6.686	46.933
205909_at	POLE2	DNA polymerase epsilon 2, accessory subunit	1.716	12.373
205913_at	PLIN1	perilipin 1	1.832	6.471
205918_at	SLC4A3	solute carrier family 4 member 3	-1.521	4.022
205930_at	GTF2E1	general transcription factor IIE subunit 1	1.011	7.942
205932_s_at	MSX1	msh homeobox 1	6.036	17.539
205934_at	PLCL1	phospholipase C like 1	-4.295	25.939
205937_at	CGREF1	cell growth regulator with EF-hand domain 1	-2.534	19.491
205946_at	VIPR2	vasoactive intestinal peptide receptor 2	3.619	3.835
205948_at	PTPRT	protein tyrosine phosphatase, receptor type T	-4.47	7.075
205950_s_at	CA1	carbonic anhydrase 1	-1.298	7.779
205952_at	KCNK3	potassium two pore domain channel subfamily K member 3	-3.809	7.345
205953_at	LRIG2	leucine rich repeats and immunoglobulin like domains 2	1.642	15.805
205967_at	HIST2H4B///HIST4H4///HIST2H4A///HIST1H4L///HIST1H4E///HIST1H4B///HIST1H4H///HIST1H4C///HIST1H4J///HIST1H4K///HIST1H4F///HIST1H4D///HIST1H4A///HIST1H4I	histone cluster 2, H4b///histone cluster 4, H4///histone cluster 2, H4a///histone cluster 1, H4l///histone cluster 1, H4e///histone cluster 1, H4b///histone cluster 1, H4h///histone cluster 1, H4c///histone cluster 1, H4j///histone cluster 1, H4k///histone cluster 1, H4f///histone cluster 1, H4d///histone cluster 1, H4a///histone cluster 1, H4i	-1.004	3.114
205968_at	KCNS3	potassium voltage-gated channel modifier subfamily S member 3	-2.379	12.293
205970_at	MT3	metallothionein 3	-2.134	6.456
205972_at	SLC38A3	solute carrier family 38 member 3	2.7	5.283
205979_at	SCGB2A1	secretoglobin family 2A member 1	2.382	6.898
205983_at	DPEP1	dipeptidase 1 (renal)	1.632	10.801
205984_at	CRHBP	corticotropin releasing hormone binding protein	-3.039	13.478
205986_at	AATK	apoptosis associated tyrosine kinase	-4.106	23.421
205990_s_at	WNT5A	Wnt family member 5A	5.449	13.143
206001_at	NPY	neuropeptide Y	-4.783	4.793
206002_at	ADGRG2	adhesion G protein-coupled receptor G2	3.18	11.18
206003_at	CEP135	centrosomal protein 135	2.23	12.538
206006_s_at	CEP162	centrosomal protein 162	2.098	9.597
206012_at	LEFTY1///LEFTY2	left-right determination factor 1///left-right determination factor 2	1.298	5.533
206014_at	ACTL6B	actin like 6B	-6.253	21.937
206017_at	KIAA0319	KIAA0319	-1.174	4.849
206018_at	FOXG1	forkhead box G1	-4.868	4.163
206024_at	HPD	4-hydroxyphenylpyruvate dioxygenase	1.276	4.802
206028_s_at	MERTK	MER proto-oncogene, tyrosine kinase	-1.592	3.824
206032_at	DSC3	desmocollin 3	1.993	6.499
206039_at	RAB33A	RAB33A, member RAS oncogene family	-4.721	24.589
206059_at	ZNF91	zinc finger protein 91	-1.421	8.382
206068_s_at	ACADL	acyl-CoA dehydrogenase, long chain	2.729	12.539
206072_at	UCN	urocortin	-1.402	4.505
206073_at	COLQ	collagen like tail subunit of asymmetric acetylcholinesterase	1.392	2.82
206074_s_at	HMGA1	high mobility group AT-hook 1	-1.403	3.092
206076_at	LRRC23	leucine rich repeat containing 23	3.194	8.056
206081_at	SLC24A1	solute carrier family 24 member 1	2.689	14.931
206082_at	HCP5	HLA complex P5 (non-protein coding)	1.842	11.809
206083_at	ADGRB1	adhesion G protein-coupled receptor B1	-1.378	2.45
206087_x_at	HFE	hemochromatosis	1.159	7.221
206089_at	NELL1	neural EGFL like 1	-5.26	15.814
206098_at	ZBTB6	zinc finger and BTB domain containing 6	1.774	4.228
206101_at	ECM2	extracellular matrix protein 2	6.984	9.042
206106_at	MAPK12	mitogen-activated protein kinase 12	-2.47	10.859
206107_at	RGS11	regulator of G-protein signaling 11	-2.641	9.483
206109_at	FUT1	fucosyltransferase 1 (H blood group)	-1.665	6.248
206111_at	RNASE2	ribonuclease A family member 2	1.829	2.866
206115_at	EGR3	early growth response 3	-1.835	2.806
206118_at	STAT4	signal transducer and activator of transcription 4	-4.104	21.622
206128_at	ADRA2C	adrenoceptor alpha 2C	-1.264	5.003
206135_at	ST18	ST18, C2H2C-type zinc finger	-4.175	7.065
206140_at	LHX2	LIM homeobox 2	-4.467	3.572
206141_at	MOCS3	molybdenum cofactor synthesis 3	1.292	6.324
206152_at	AGAP2	ArfGAP with GTPase domain, ankyrin repeat and PH domain 2	-4.408	27.771
206153_at	CYP4F11	cytochrome P450 family 4 subfamily F member 11	1.775	10.652
206157_at	PTX3	pentraxin 3	3.72	3.743
206159_at	GDF10	growth differentiation factor 10	3.729	4.355
206162_x_at	SYT5	synaptotagmin 5	-2.952	12.946
206163_at	MIR548F5///MAB21L1	microRNA 548f-5///mab-21 like 1	2.308	1.931
206167_s_at	ARHGAP6	Rho GTPase activating protein 6	2.393	6.494
206170_at	ADRB2	adrenoceptor beta 2	3.513	13.633
206176_at	BMP6	bone morphogenetic protein 6	1.888	6.46
206178_at	PLA2G5	phospholipase A2 group V	-2.299	8.713
206182_at	ZNF134	zinc finger protein 134	1.365	4.962
206186_at	MPP3	membrane palmitoylated protein 3	-1.484	4.273
206191_at	ENTPD3	ectonucleoside triphosphate diphosphohydrolase 3	-4.65	15.995
206194_at	HOXC4	homeobox C4	2.059	4.526
206196_s_at	RUNDC3A	RUN domain containing 3A	-7.343	30.272
206197_at	NME5	NME/NM23 family member 5	2.271	6.537
206204_at	GRB14	growth factor receptor bound protein 14	-1.982	1.784
206213_at	WNT10B	Wnt family member 10B	-2.395	6.755
206217_at	EDA	ectodysplasin A	2.423	15.908
206230_at	LHX1	LIM homeobox 1	-1.214	5.065
206231_at	KCNN1	potassium calcium-activated channel subfamily N member 1	-3.057	17.033
206247_at	MICB	MHC class I polypeptide-related sequence B	1.586	5.041
206258_at	ST8SIA5	ST8 alpha-N-acetyl-neuraminide alpha-2,8-sialyltransferase 5	-3.239	18.453
206263_at	FMO4	flavin containing monooxygenase 4	3.068	16.183
206267_s_at	MATK	megakaryocyte-associated tyrosine kinase	-2.323	6.088
206271_at	TLR3	toll like receptor 3	2.874	26.698
206274_s_at	CROCC	ciliary rootlet coiled-coil, rootletin	1.396	2.425
206280_at	CDH18	cadherin 18	-7.316	12.155
206289_at	HOXA4	homeobox A4	2.283	5.467
206290_s_at	RGS7	regulator of G-protein signaling 7	-6.521	27.59
206291_at	NTS	neurotensin	3.416	4.595
206295_at	IL18	interleukin 18	1.563	4.54
206298_at	ARHGAP22	Rho GTPase activating protein 22	-2.187	3.594
206308_at	TRDMT1	tRNA aspartic acid methyltransferase 1	2.109	11.291
206314_at	ZKSCAN7	zinc finger with KRAB and SCAN domains 7	1.36	3.44
206315_at	CRLF1	cytokine receptor like factor 1	5.139	6.92
206316_s_at	KNTC1	kinetochore associated 1	1.719	9.619
206326_at	GRP	gastrin releasing peptide	-1.735	8.59
206329_at	EXTL1	exostosin like glycosyltransferase 1	-1.699	10.594
206331_at	CALCRL	calcitonin receptor like receptor	2.242	4.533
206334_at	LIPF	lipase F, gastric type	1.277	5.145
206335_at	GALNS	galactosamine (N-acetyl)-6-sulfatase	2.505	12.715
206336_at	CXCL6	C-X-C motif chemokine ligand 6	3.475	10.199
206339_at	CARTPT	CART prepropeptide	-3.098	17.172
206351_s_at	PEX10	peroxisomal biogenesis factor 10	1.383	4.965
206362_x_at	MAP3K10	mitogen-activated protein kinase kinase kinase 10	-2.365	13.529
206364_at	KIF14	kinesin family member 14	2.449	12.852
206373_at	ZIC1	Zic family member 1	2.839	9.375
206374_at	LOC101927562///DUSP8	uncharacterized LOC101927562///dual specificity phosphatase 8	-5.092	27.123
206375_s_at	HSPB3	heat shock protein family B (small) member 3	-2.677	12.975
206376_at	SLC6A15	solute carrier family 6 member 15	-4.258	13.257
206382_s_at	BDNF	brain derived neurotrophic factor	-4.658	17.036
206384_at	CACNG3	calcium voltage-gated channel auxiliary subunit gamma 3	-6.467	24.043
206385_s_at	ANK3	ankyrin 3, node of Ranvier (ankyrin G)	-6.178	28.627
206392_s_at	RARRES1	retinoic acid receptor responder 1	2.177	10.478
206395_at	DGKG	diacylglycerol kinase gamma	-2.13	2.361
206397_x_at	CERS1///GDF1	ceramide synthase 1///growth differentiation factor 1	1.571	7.115
206403_at	ZNF536	zinc finger protein 536	-2.835	6.904
206408_at	LRRTM2	leucine rich repeat transmembrane neuronal 2	-4.867	22.908
206424_at	CYP26A1	cytochrome P450 family 26 subfamily A member 1	-1.803	9.764
206436_at	MPPED1	metallophosphoesterase domain containing 1	-3.374	13.27
206438_x_at	TCTN2	tectonic family member 2	1.083	4.722
206444_at	PDE1B	phosphodiesterase 1B	-1.115	7.292
206448_at	ZNF365	zinc finger protein 365	-5.357	26.717
206456_at	GABRA5	gamma-aminobutyric acid type A receptor alpha5 subunit	-2.126	1.871
206465_at	ACSBG1	acyl-CoA synthetase bubblegum family member 1	-4.801	12.946
206467_x_at	RTEL1-TNFRSF6B///TNFRSF6B	RTEL1-TNFRSF6B readthrough (NMD candidate)///TNF receptor superfamily member 6b	-1.733	6.434
206477_s_at	NOVA2	NOVA alternative splicing regulator 2	-1.707	11.323
206483_at	LRRC6	leucine rich repeat containing 6	3.308	10.024
206492_at	FHIT	fragile histidine triad	-1.152	2.724
206499_s_at	RCC1	regulator of chromosome condensation 1	1.174	5.086
206502_s_at	INSM1	INSM transcriptional repressor 1	-2.509	2.175
206513_at	AIM2	absent in melanoma 2	1.905	7.083
206515_at	CYP4F3	cytochrome P450 family 4 subfamily F member 3	3.557	8.501
206518_s_at	RGS9	regulator of G-protein signaling 9	3.432	16.878
206526_at	RIBC2	RIB43A domain with coiled-coils 2	4.023	14.704
206528_at	TRPC6	transient receptor potential cation channel subfamily C member 6	1.164	3.655
206529_x_at	SLC26A4	solute carrier family 26 member 4	-1.649	8.257
206539_s_at	CYP4F12	cytochrome P450 family 4 subfamily F member 12	4.103	12.722
206540_at	GLB1L	galactosidase beta 1 like	4.215	21.673
206547_s_at	PPEF1	protein phosphatase with EF-hand domain 1	-3.186	12.303
206552_s_at	TAC1	tachykinin precursor 1	-7.17	25.246
206557_at	ZNF702P	zinc finger protein 702, pseudogene	-2.07	8.261
206574_s_at	PTP4A3	protein tyrosine phosphatase type IVA, member 3	2.166	3.3
206577_at	VIP	vasoactive intestinal peptide	-3.842	15.899
206587_at	CCT6B	chaperonin containing TCP1 subunit 6B	2.25	10.604
206601_s_at	LOC401021///HOXD4///HOXD3	uncharacterized LOC401021///homeobox D4///homeobox D3	1.739	3.133
206605_at	ENDOU	endonuclease, poly(U) specific	1.853	6.981
206613_s_at	TAF1A	TATA-box binding protein associated factor, RNA polymerase I subunit A	1.851	5.389
206625_at	PRPH2	peripherin 2	-2.216	17.722
206632_s_at	APOBEC3B	apolipoprotein B mRNA editing enzyme catalytic subunit 3B	1.833	12.872
206648_at	ZNF571	zinc finger protein 571	1.025	3.548
206655_s_at	SEPT5-GP1BB///SEPT5///GP1BB	SEPT5-GP1BB readthrough///septin 5///glycoprotein Ib platelet beta subunit	-2.544	18.634
206662_at	GLRX	glutaredoxin	-1.037	2.483
206683_at	ZNF165	zinc finger protein 165	1.977	13.121
206685_at	HCG4	HLA complex group 4 (non-protein coding)	2.318	8.645
206690_at	ASIC2	acid sensing ion channel subunit 2	-5.083	19.478
206696_at	GPR143	G protein-coupled receptor 143	1.724	4.818
206698_at	XK	X-linked Kx blood group	-2.83	7.236
206700_s_at	KDM5D	lysine demethylase 5D	-2.483	3.262
206702_at	TEK	TEK receptor tyrosine kinase	-1.76	8.277
206711_at	TMEM257	transmembrane protein 257	-5.308	20.776
206732_at	SLITRK3	SLIT and NTRK like family member 3	-5.591	26.017
206737_at	WNT11	Wnt family member 11	2.395	10.32
206752_s_at	DFFB	DNA fragmentation factor subunit beta	-1.671	4.257
206756_at	CHST7	carbohydrate sulfotransferase 7	-1.442	3.228
206762_at	KCNA5	potassium voltage-gated channel subfamily A member 5	2.682	4.249
206765_at	KCNJ2	potassium voltage-gated channel subfamily J member 2	-1.813	7.261
206772_at	PTH2R	parathyroid hormone 2 receptor	-1.18	8.935
206773_at	LY6H	lymphocyte antigen 6 complex, locus H	1.682	2.631
206780_at	GAD2	glutamate decarboxylase 2	-6.24	31.489
206785_s_at	KLRC2///KLRC1	killer cell lectin like receptor C2///killer cell lectin like receptor C1	-1.289	1.748
206793_at	PNMT	phenylethanolamine N-methyltransferase	1.166	1.738
206797_at	NAT2	N-acetyltransferase 2	1.569	7.96
206799_at	SCGB1D2	secretoglobin family 1D member 2	1.546	5.114
206803_at	PDYN	prodynorphin	-2.147	11.443
206813_at	CTF1	cardiotrophin 1	1.028	5.204
206815_at	SPAG8	sperm associated antigen 8	2.875	6.707
206818_s_at	CNNM2	cyclin and CBS domain divalent metal cation transport mediator 2	-2.154	4.911
206825_at	OXTR	oxytocin receptor	-3.136	8.653
206826_at	PMP2	peripheral myelin protein 2	-3.47	6.333
206837_at	ALX1	ALX homeobox 1	1.784	8.372
206844_at	FBP2	fructose-bisphosphatase 2	1.305	2.099
206857_s_at	FKBP1B	FK506 binding protein 1B	-3.32	19.945
206878_at	DAO	D-amino acid oxidase	2.62	2.257
206888_s_at	ARHGDIG	Rho GDP dissociation inhibitor gamma	-6.267	23.385
206898_at	CDH19	cadherin 19	-2.595	10.861
206899_at	NTSR2	neurotensin receptor 2	-3.907	3.204
206906_at	ICAM5	intercellular adhesion molecule 5	-2.512	9.129
206907_at	TNFSF9	tumor necrosis factor superfamily member 9	-1.285	10.856
206915_at	NKX2-2	NK2 homeobox 2	-3.997	8.079
206932_at	CH25H	cholesterol 25-hydroxylase	1.837	2.575
206935_at	PCDH8	protocadherin 8	-3.77	7.256
206941_x_at	SEMA3E	semaphorin 3E	-2.592	10.677
206949_s_at	RUSC1	RUN and SH3 domain containing 1	-2.103	16.154
206960_at	LPAR4	lysophosphatidic acid receptor 4	4.046	11.89
206984_s_at	RIT2	Ras like without CAAX 2	-7.11	23.985
206989_s_at	SCAF11	SR-related CTD associated factor 11	1.742	8.819
206991_s_at	CCR5	C-C motif chemokine receptor 5 (gene/pseudogene)	1.448	7.029
206999_at	IL12RB2	interleukin 12 receptor subunit beta 2	-1.666	11.769
207000_s_at	PPP3CC	protein phosphatase 3 catalytic subunit gamma	-1.032	8.622
207006_s_at	CCDC106	coiled-coil domain containing 106	-1.099	6.114
207010_at	GABRB1	gamma-aminobutyric acid type A receptor beta1 subunit	-6.256	19.962
207011_s_at	PTK7	protein tyrosine kinase 7 (inactive)	1.648	5.5
207014_at	GABRA2	gamma-aminobutyric acid type A receptor alpha2 subunit	-5.147	14.663
207025_at	GJC2	gap junction protein gamma 2	-1.474	3.562
207030_s_at	CSRP2	cysteine and glycine rich protein 2	3.753	14.614
207035_at	SLC30A3	solute carrier family 30 member 3	-3.94	9.428
207043_s_at	SLC6A9	solute carrier family 6 member 9	1.741	6.151
207054_at	IMPG1	interphotoreceptor matrix proteoglycan 1	-1.092	8.263
207055_at	GPR37L1	G protein-coupled receptor 37 like 1	2.43	3.311
207057_at	SLC16A7	solute carrier family 16 member 7	-4.377	22.557
207063_at	TTTY14	testis-specific transcript, Y-linked 14 (non-protein coding)	-1.561	1.88
207070_at	RGR	retinal G protein coupled receptor	-2.995	13.981
207081_s_at	PI4KA	phosphatidylinositol 4-kinase alpha	-2.465	23.392
207091_at	P2RX7	purinergic receptor P2X 7	-1.395	2.381
207093_s_at	LOC101927057///OMG	uncharacterized LOC101927057///oligodendrocyte myelin glycoprotein	-5.15	15.075
207103_at	KCND2	potassium voltage-gated channel subfamily D member 2	-3.057	6.064
207107_at	RPE65	RPE65, retinoid isomerohydrolase	3.246	9.987
207110_at	LOC100996843///KCNJ18///KCNJ12	ATP-sensitive inward rectifier potassium channel 12-like///potassium voltage-gated channel subfamily J member 18///potassium voltage-gated channel subfamily J member 12	-2.074	2.052
207135_at	HTR2A	5-hydroxytryptamine receptor 2A	-3.923	12.296
207144_s_at	CITED1	Cbp/p300 interacting transactivator with Glu/Asp rich carboxy-terminal domain 1	-3.293	10.154
207145_at	MSTN	myostatin	1.766	3.968
207147_at	DLX2	distal-less homeobox 2	-2.742	2.894
207149_at	CDH12	cadherin 12	-4.779	5.533
207153_s_at	GLMN	glomulin, FKBP associated protein	-1.174	7.158
207154_at	DIO3	deiodinase, iodothyronine, type III	2.082	6.206
207156_at	HIST1H2AH///HIST1H2AG///HIST1H2AM///HIST1H2AL///HIST1H2AK///HIST1H2AI	histone cluster 1, H2ah///histone cluster 1, H2ag///histone cluster 1, H2am///histone cluster 1, H2al///histone cluster 1, H2ak///histone cluster 1, H2ai	1.095	4.011
207157_s_at	GNG5	G protein subunit gamma 5	1.507	22.335
207165_at	HMMR	hyaluronan mediated motility receptor	2.734	14.107
207169_x_at	MIR4640///DDR1	microRNA 4640///discoidin domain receptor tyrosine kinase 1	2.132	16.535
207173_x_at	CDH11	cadherin 11	1.302	5.446
207174_at	GPC5	glypican 5	-5.934	16.754
207181_s_at	CASP7	caspase 7	1.129	3.791
207183_at	GPR19	G protein-coupled receptor 19	-1.888	9.442
207195_at	CNTN6	contactin 6	-2.196	11.313
207197_at	ZIC3	Zic family member 3	2.423	3.371
207210_at	GABRA3	gamma-aminobutyric acid type A receptor alpha3 subunit	-1.155	3.015
207227_x_at	RFPL2	ret finger protein like 2	-2.499	21.076
207261_at	CNGA3	cyclic nucleotide gated channel alpha 3	2.387	7.938
207283_at	RPL23AP32	ribosomal protein L23a pseudogene 32	-1.535	8.568
207299_s_at	GRM1	glutamate metabotropic receptor 1	-1.612	2.064
207307_at	HTR2C	5-hydroxytryptamine receptor 2C	-4.002	4.498
207312_at	PHKG1	phosphorylase kinase catalytic subunit gamma 1	3.084	17.303
207338_s_at	ZNF200	zinc finger protein 200	1.228	6.22
207366_at	KCNS1	potassium voltage-gated channel modifier subfamily S member 1	-1.078	2.22
207402_at	ZNF132	zinc finger protein 132	1.585	12.753
207404_s_at	HTR1E	5-hydroxytryptamine receptor 1E	-1.191	5.813
207414_s_at	LOC100507472///PCSK6	uncharacterized LOC100507472///proprotein convertase subtilisin/kexin type 6	-2.517	7.592
207443_at	NR2E1	nuclear receptor subfamily 2 group E member 1	-4.131	3.743
207447_s_at	MGAT4C	MGAT4 family member C	-1.565	1.765
207455_at	P2RY1	purinergic receptor P2Y1	1.179	4.969
207490_at	TUBA4B	tubulin alpha 4b	1.697	1.891
207522_s_at	ATP2A3	ATPase sarcoplasmic/endoplasmic reticulum Ca2+ transporting 3	-1.35	2.305
207543_s_at	P4HA1	prolyl 4-hydroxylase subunit alpha 1	2.015	10.67
207546_at	ATP4B	ATPase H+/K+ transporting beta subunit	1.953	6.223
207548_at	LOC100996542///GRM7	uncharacterized LOC100996542///glutamate metabotropic receptor 7	-6.141	27.076
207556_s_at	DGKZ	diacylglycerol kinase zeta	-3.364	25.948
207574_s_at	GADD45B	growth arrest and DNA damage inducible beta	-1.217	1.823
207593_at	ABCG4	ATP binding cassette subfamily G member 4	-3.209	17.58
207606_s_at	ARHGAP12	Rho GTPase activating protein 12	1.14	8.612
207621_s_at	PEMT	phosphatidylethanolamine N-methyltransferase	1.258	5.584
207624_s_at	RPGR	retinitis pigmentosa GTPase regulator	2.81	11.226
207636_at	SERPINI2	serpin family I member 2	3.551	23.841
207643_s_at	TNFRSF1A	TNF receptor superfamily member 1A	1.853	6.174
207655_s_at	BLNK	B-cell linker	1.012	1.833
207671_s_at	BEST1	bestrophin 1	-1.017	2.984
207695_s_at	IGSF1	immunoglobulin superfamily member 1	4.275	2.746
207703_at	NLGN4Y	neuroligin 4, Y-linked	-2.336	5.032
207705_s_at	NINL	ninein like	1.986	6.452
207714_s_at	SERPINH1	serpin family H member 1	3.706	9.852
207717_s_at	PKP2	plakophilin 2	1.331	2.178
207723_s_at	KLRC3	killer cell lectin like receptor C3	-1.229	3.275
207729_at	CDH9	cadherin 9	-2.492	14.924
207767_s_at	EGR4	early growth response 4	-4.878	19.313
207797_s_at	LRP2BP	LRP2 binding protein	5.43	18.131
207805_s_at	PSMD9	proteasome 26S subunit, non-ATPase 9	1.126	16.789
207808_s_at	PROS1	protein S (alpha)	2.194	7.561
207813_s_at	FDXR	ferredoxin reductase	1.643	6.022
207826_s_at	ID3	inhibitor of DNA binding 3, HLH protein	1.481	2.554
207828_s_at	CENPF	centromere protein F	4.476	14.761
207850_at	CXCL3	C-X-C motif chemokine ligand 3	4.168	9.482
207853_s_at	SNCB	synuclein beta	-7.209	26.079
207876_s_at	FLNC	filamin C	4.377	11.069
207877_s_at	NVL	nuclear VCP-like	1.047	5.08
207896_s_at	DLEC1	deleted in lung and esophageal cancer 1	3.237	17.647
207936_x_at	RFPL3	ret finger protein like 3	-1.204	8.314
207949_s_at	ICA1	islet cell autoantigen 1	-1.372	7.066
207959_s_at	DNAH9	dynein axonemal heavy chain 9	2.507	4.909
207961_x_at	MYH11	myosin heavy chain 11	-1.324	2.869
207981_s_at	ESRRG	estrogen related receptor gamma	-2.05	6.276
207992_s_at	AMPD3	adenosine monophosphate deaminase 3	1.12	3.883
208002_s_at	ACOT7	acyl-CoA thioesterase 7	-3.032	10.228
208017_s_at	MCF2	MCF.2 cell line derived transforming sequence	-3.958	16.799
208079_s_at	AURKA	aurora kinase A	1.434	3.594
208093_s_at	NDEL1	nudE neurodevelopment protein 1 like 1	-1.763	18.074
208096_s_at	COL21A1	collagen type XXI alpha 1 chain	3.238	4.983
208102_s_at	PSD	pleckstrin and Sec7 domain containing	-3.061	22.769
208107_s_at	LOC81691	exonuclease NEF-sp	1.739	6.525
208117_s_at	LAS1L	LAS1 like, ribosome biogenesis factor	1.21	6.454
208120_x_at	FKSG49	FKSG49	-1.115	6.105
208123_at	KCNB2	potassium voltage-gated channel subfamily B member 2	-1.993	6.381
208140_s_at	DRC3	dynein regulatory complex subunit 3	4.87	9.823
208146_s_at	CPVL	carboxypeptidase, vitellogenic like	3.152	11.133
208158_s_at	OSBPL1A	oxysterol binding protein like 1A	-1.533	11.413
208161_s_at	ABCC3	ATP binding cassette subfamily C member 3	1.487	7.177
208186_s_at	LIPE	lipase E, hormone sensitive type	-1.117	3.126
208190_s_at	LSR	lipolysis stimulated lipoprotein receptor	1.243	4.516
208212_s_at	ALK	anaplastic lymphoma receptor tyrosine kinase	-1.559	6.384
208249_s_at	TGDS	TDP-glucose 4,6-dehydratase	1.171	4.243
208270_s_at	RNPEP	arginyl aminopeptidase	1.266	7.982
208288_at	ABCB11	ATP binding cassette subfamily B member 11	1.267	6.066
208306_x_at	HLA-DRB1	major histocompatibility complex, class II, DR beta 1	1.714	4.447
208319_s_at	RBM3	RNA binding motif (RNP1, RRM) protein 3	2.516	12.62
208321_s_at	CABP1	calcium binding protein 1	-5.182	17.76
208335_s_at	ACKR1	atypical chemokine receptor 1 (Duffy blood group)	-1.365	2.17
208359_s_at	KCNJ4	potassium voltage-gated channel subfamily J member 4	-2.823	3.052
208394_x_at	ESM1	endothelial cell specific molecule 1	1.244	3.117
208398_s_at	TBPL1	TATA-box binding protein like 1	-1.523	14.184
208405_s_at	CD164	CD164 molecule	1.053	8.838
208451_s_at	C4B_2///C4B///C4A	complement component 4B (Chido blood group), copy 2///complement component 4B (Chido blood group)///complement component 4A (Rodgers blood group)	3.436	5.737
208510_s_at	PPARG	peroxisome proliferator activated receptor gamma	3.702	11.74
208561_at	ABCC9	ATP binding cassette subfamily C member 9	2.95	15.149
208567_s_at	LOC100996843///KCNJ18///KCNJ12	ATP-sensitive inward rectifier potassium channel 12-like///potassium voltage-gated channel subfamily J member 18///potassium voltage-gated channel subfamily J member 12	-2.281	3.085
208607_s_at	SAA2-SAA4///SAA2///SAA1	SAA2-SAA4 readthrough///serum amyloid A2///serum amyloid A1	1.547	3.61
208612_at	PDIA3	protein disulfide isomerase family A member 3	1.78	16.599
208614_s_at	FLNB	filamin B	1.604	3.742
208623_s_at	EZR	ezrin	1.919	9.866
208626_s_at	VAT1	vesicle amine transport 1	1.257	2.802
208628_s_at	YBX1	Y-box binding protein 1	1.187	15.926
208638_at	PDIA6	protein disulfide isomerase family A member 6	1.156	12.398
208642_s_at	XRCC5	X-ray repair cross complementing 5	1.079	12.865
208659_at	CLIC1	chloride intracellular channel 1	3.144	21.155
208675_s_at	DDOST	dolichyl-diphosphooligosaccharide--protein glycosyltransferase non-catalytic subunit	1.602	15.84
208678_at	ATP6V1E1	ATPase H+ transporting V1 subunit E1	-1.747	21.917
208682_s_at	MAGED2	MAGE family member D2	1.736	9.322
208683_at	CAPN2	calpain 2	1.18	9.058
208690_s_at	PDLIM1	PDZ and LIM domain 1	2.593	4.459
208712_at	CCND1	cyclin D1	3.193	7.258
208716_s_at	TMCO1	transmembrane and coiled-coil domains 1	1.525	17.915
208747_s_at	C1S	complement component 1, s subcomponent	1.923	1.832
208759_at	NCSTN	nicastrin	1.69	7.129
208763_s_at	TSC22D3	TSC22 domain family member 3	-1.049	3.648
208782_at	FSTL1	follistatin like 1	2.64	17.753
208789_at	PTRF	polymerase I and transcript release factor	2.841	15.413
208795_s_at	MCM7	minichromosome maintenance complex component 7	1.028	2.487
208806_at	CHD3	chromodomain helicase DNA binding protein 3	-2.82	10.366
208808_s_at	HMGB2	high mobility group box 2	1.841	9.545
208812_x_at	HLA-C	major histocompatibility complex, class I, C	1.129	5.444
208813_at	GOT1	glutamic-oxaloacetic transaminase 1	-2.471	21.901
208816_x_at	ANXA2P2	annexin A2 pseudogene 2	2.709	13.163
208818_s_at	COMT	catechol-O-methyltransferase	1.286	8.148
208819_at	RAB8A	RAB8A, member RAS oncogene family	1.056	5.796
208824_x_at	CDK16	cyclin dependent kinase 16	-1.391	7.089
208851_s_at	THY1	Thy-1 cell surface antigen	-4.144	22.175
208858_s_at	ESYT1	extended synaptotagmin 1	1.053	3.335
208868_s_at	GABARAPL1	GABA type A receptor associated protein like 1	-2.148	12.466
208873_s_at	REEP5	receptor accessory protein 5	-1.03	12.973
208874_x_at	PTPA	protein phosphatase 2 phosphatase activator	-1.08	5.518
208885_at	LCP1	lymphocyte cytosolic protein 1	1	2.279
208890_s_at	PLXNB2	plexin B2	2.223	9.449
208891_at	DUSP6	dual specificity phosphatase 6	-1.125	3.396
208894_at	HLA-DRA	major histocompatibility complex, class II, DR alpha	3.126	6.996
208906_at	HNRNPUL2-BSCL2///BSCL2	HNRNPUL2-BSCL2 readthrough (NMD candidate)///BSCL2, seipin lipid droplet biogenesis associated	-1.148	5.515
208912_s_at	CNP	2',3'-cyclic nucleotide 3' phosphodiesterase	-1.632	11.97
208932_at	PPP4C	protein phosphatase 4 catalytic subunit	1.649	12.94
208937_s_at	ID1	inhibitor of DNA binding 1, HLH protein	1.594	2.868
208939_at	SEPHS1	selenophosphate synthetase 1	1.027	7.343
208944_at	TGFBR2	transforming growth factor beta receptor 2	1.438	6.172
208949_s_at	LGALS3	lectin, galactoside binding soluble 3	2.04	4.78
208950_s_at	ALDH7A1	aldehyde dehydrogenase 7 family member A1	1.8	10.166
208967_s_at	AK2	adenylate kinase 2	1.177	7.229
208972_s_at	ATP5G1	ATP synthase, H+ transporting, mitochondrial Fo complex subunit C1 (subunit 9)	-1.017	6.23
208978_at	CRIP2	cysteine rich protein 2	2.807	7.436
208986_at	TCF12	transcription factor 12	2.128	14.863
208998_at	UCP2	uncoupling protein 2	2.003	8.487
209011_at	TRIO	trio Rho guanine nucleotide exchange factor	-1.484	10.842
209019_s_at	PINK1	PTEN induced putative kinase 1	-1.243	12.013
209022_at	STAG2	stromal antigen 2	1.033	11.399
209035_at	MDK	midkine (neurite growth-promoting factor 2)	3.219	5.312
209040_s_at	PSMB8	proteasome subunit beta 8	3.727	15.576
209047_at	AQP1	aquaporin 1 (Colton blood group)	4.667	2.221
209054_s_at	WHSC1	Wolf-Hirschhorn syndrome candidate 1	1.118	5.363
209067_s_at	HNRNPDL	heterogeneous nuclear ribonucleoprotein D like	1.169	13.962
209074_s_at	FAM107A	family with sequence similarity 107 member A	-1.094	3.231
209081_s_at	COL18A1	collagen type XVIII alpha 1 chain	2.098	3.033
209083_at	CORO1A	coronin 1A	-1.861	6.675
209085_x_at	RFC1	replication factor C subunit 1	1.255	10.996
209093_s_at	GBAP1///GBA	glucosylceramidase beta pseudogene 1///glucosylceramidase beta	1.017	2.947
209101_at	CTGF	connective tissue growth factor	1.946	5.029
209106_at	NCOA1	nuclear receptor coactivator 1	-1.077	13.373
209108_at	TSPAN6	tetraspanin 6	4.437	19.83
209110_s_at	RGL2	ral guanine nucleotide dissociation stimulator like 2	1.591	10.759
209116_x_at	HBB	hemoglobin subunit beta	-1.526	4.644
209123_at	QDPR	quinoid dihydropteridine reductase	-2.015	22.364
209124_at	MYD88	myeloid differentiation primary response 88	1.186	4.615
209129_at	TRIP6	thyroid hormone receptor interactor 6	2.368	8.161
209130_at	SNAP23	synaptosome associated protein 23	1.226	10.431
209132_s_at	COMMD4	COMM domain containing 4	1.525	7.631
209140_x_at	HLA-B	major histocompatibility complex, class I, B	1.314	6.309
209150_s_at	IPO4///TM9SF1	importin 4///transmembrane 9 superfamily member 1	2.688	25.764
209153_s_at	TCF3	transcription factor 3	1.704	8.954
209154_at	P2RX5-TAX1BP3///TAX1BP3	P2RX5-TAX1BP3 readthrough (NMD candidate)///Tax1 binding protein 3	2.259	14.239
209156_s_at	COL6A2	collagen type VI alpha 2 chain	6.806	11.311
209159_s_at	NDRG4	NDRG family member 4	-2.033	9.473
209163_at	CYB561	cytochrome b561	1.297	5.219
209166_s_at	MAN2B1	mannosidase alpha class 2B member 1	1.604	10.888
209183_s_at	C10orf10	chromosome 10 open reading frame 10	-1.986	2.664
209191_at	TUBB6	tubulin beta 6 class V	2.001	5.679
209194_at	CETN2	centrin 2	2.568	14.989
209199_s_at	MEF2C	myocyte enhancer factor 2C	-1.811	6.205
209205_s_at	LMO4	LIM domain only 4	-1.309	5.392
209211_at	KLF5	Kruppel like factor 5	1.612	2.47
209218_at	SQLE	squalene epoxidase	1.763	11.435
209220_at	GPC3	glypican 3	1.588	2.701
209229_s_at	PPP6R1	protein phosphatase 6 regulatory subunit 1	-1.115	6.172
209230_s_at	NUPR1	nuclear protein 1, transcriptional regulator	1.625	2.089
209234_at	KIF1B	kinesin family member 1B	-1.097	11.631
209238_at	STX3	syntaxin 3	-2.043	12.88
209242_at	PEG3	paternally expressed 3	-2.867	21.405
209259_s_at	SMC3	structural maintenance of chromosomes 3	1.241	5.045
209263_x_at	TSPAN4	tetraspanin 4	1.445	2.902
209275_s_at	CLN3	CLN3, battenin	1.248	6.52
209289_at	NFIB	nuclear factor I B	1.276	10.062
209291_at	ID4	inhibitor of DNA binding 4, HLH protein	1.797	9.757
209295_at	TNFRSF10B	TNF receptor superfamily member 10b	2.594	12.182
209297_at	ITSN1	intersectin 1	1.452	4.72
209300_s_at	NECAP1	NECAP endocytosis associated 1	-2.177	23.094
209307_at	SWAP70	SWAP switching B-cell complex 70kDa subunit	1.609	8.98
209309_at	AZGP1	alpha-2-glycoprotein 1, zinc-binding	1.6	2.718
209310_s_at	CASP4	caspase 4	1.007	3.045
209311_at	BCL2L2	BCL2 like 2	-2.426	19.074
209312_x_at	LOC101060835///LOC100996809///HLA-DRB5///HLA-DRB4///HLA-DRB1///HLA-DQB1	HLA class II histocompatibility antigen, DQ beta 1 chain-like///HLA class II histocompatibility antigen, DRB1-10 beta chain-like///major histocompatibility complex, class II, DR beta 5///major histocompatibility complex, class II, DR beta 4///major histocompatibility complex, class II, DR beta 1///major histocompatibility complex, class II, DQ beta 1	1.914	4.485
209323_at	THAP12	THAP domain containing 12	1.131	5.59
209324_s_at	RGS16	regulator of G-protein signaling 16	-2.165	2.981
209333_at	ULK1	unc-51 like autophagy activating kinase 1	-1.75	9.47
209341_s_at	IKBKB	inhibitor of kappa light polypeptide gene enhancer in B-cells, kinase beta	1.504	9.523
209345_s_at	PI4K2A	phosphatidylinositol 4-kinase type 2 alpha	-1.159	9.586
209352_s_at	SIN3B	SIN3 transcription regulator family member B	-1.187	5.526
209360_s_at	LOC101928269///LOC100506403///RUNX1	uncharacterized LOC101928269///uncharacterized LOC100506403///runt related transcription factor 1	1.528	2.838
209361_s_at	PCBP4	poly(rC) binding protein 4	-2.301	14.805
209368_at	EPHX2	epoxide hydrolase 2	2.695	11.107
209369_at	ANXA3	annexin A3	-3.668	4.552
209374_s_at	IGHM	immunoglobulin heavy constant mu	1.28	2.041
209379_s_at	CCSER2	coiled-coil serine rich protein 2	-1.135	10.458
209380_s_at	ABCC5	ATP binding cassette subfamily C member 5	-2.695	26.651
209390_at	TSC1	tuberous sclerosis 1	-1.293	15.885
209392_at	ENPP2	ectonucleotide pyrophosphatase/phosphodiesterase 2	-1.701	4.351
209402_s_at	SLC12A4	solute carrier family 12 member 4	1.083	2.753
209403_at	TBC1D3I///TBC1D3E///LOC101060389///TBC1D3L///TBC1D3K///TBC1D3G///TBC1D3H///TBC1D3///TBC1D3C///TBC1D3F	TBC1 domain family member 3I///TBC1 domain family member 3E///TBC1 domain family member-like///TBC1 domain family member 3L///TBC1 domain family member 3K///TBC1 domain family member 3G///TBC1 domain family member 3H///TBC1 domain family member 3///TBC1 domain family member 3C///TBC1 domain family member 3F	-1.298	5.614
209406_at	BAG2	BCL2 associated athanogene 2	2.252	6
209407_s_at	DEAF1	DEAF1, transcription factor	-1.103	6.104
209408_at	KIF2C	kinesin family member 2C	2.444	14.687
209409_at	GRB10	growth factor receptor bound protein 10	-1.329	5.948
209417_s_at	IFI35	interferon induced protein 35	3.278	8.669
209428_s_at	ZFPL1	zinc finger protein like 1	1.029	4.235
209435_s_at	ARHGEF2	Rho/Rac guanine nucleotide exchange factor 2	-2.473	16.506
209443_at	SERPINA5	serpin family A member 5	4.685	17.757
209444_at	RAP1GDS1	Rap1 GTPase-GDP dissociation stimulator 1	-2.144	28.717
209445_x_at	COA1	cytochrome c oxidase assembly factor 1 homolog	-1.58	6.786
209448_at	HTATIP2	HIV-1 Tat interactive protein 2	-2.181	8.827
209449_at	LSM2	LSM2 homolog, U6 small nuclear RNA and mRNA degradation associated	1.418	8.958
209457_at	DUSP5	dual specificity phosphatase 5	-2.262	3.087
209462_at	APLP1	amyloid beta precursor like protein 1	-3.524	22.059
209464_at	AURKB	aurora kinase B	1.502	6.413
209468_at	LRP5	LDL receptor related protein 5	2.219	8.184
209475_at	MIR6125///USP15	microRNA 6125///ubiquitin specific peptidase 15	-1.847	17.599
209476_at	TMX1	thioredoxin related transmembrane protein 1	1.491	7.331
209482_at	POP7	POP7 homolog, ribonuclease P/MRP subunit	-1.051	4.223
209493_at	PDZD2	PDZ domain containing 2	-1.66	7.513
209497_s_at	RBM4B	RNA binding motif protein 4B	1.525	5.458
209501_at	LOC101060399///CDR2	cerebellar degeneration-related protein 2///cerebellar degeneration related protein 2	-1.25	8.538
209520_s_at	NCBP1	nuclear cap binding protein subunit 1	1.271	3.922
209530_at	CACNB3	calcium voltage-gated channel auxiliary subunit beta 3	-2.953	15.851
209539_at	ARHGEF6	Rac/Cdc42 guanine nucleotide exchange factor 6	1.107	4.508
209541_at	IGF1	insulin like growth factor 1	-2.243	3.573
209545_s_at	RIPK2	receptor interacting serine/threonine kinase 2	1.556	5.839
209556_at	NCDN	neurochondrin	-4.316	39.023
209558_s_at	HIP1R	huntingtin interacting protein 1 related	-1.173	3.183
209568_s_at	RGL1	ral guanine nucleotide dissociation stimulator like 1	-1.138	9.103
209575_at	IL10RB	interleukin 10 receptor subunit beta	1.593	12.564
209578_s_at	POFUT2	protein O-fucosyltransferase 2	1.111	5.46
209581_at	PLA2G16	phospholipase A2 group XVI	1.168	4.027
209583_s_at	CD200	CD200 molecule	-2.96	18.815
209590_at	BMP7	bone morphogenetic protein 7	1.48	3.87
209596_at	MXRA5	matrix remodeling associated 5	1.71	2.489
209606_at	CYTIP	cytohesin 1 interacting protein	1.43	6.575
209619_at	CD74	CD74 molecule	1.788	2.956
209620_s_at	ABCB7	ATP binding cassette subfamily B member 7	1.156	6.199
209621_s_at	PDLIM3	PDZ and LIM domain 3	3.106	7.423
209623_at	MCCC2	methylcrotonoyl-CoA carboxylase 2	1.253	7.387
209628_at	NXT2	nuclear transport factor 2 like export factor 2	2.181	13.17
209631_s_at	SEL1L2///GPR37	SEL1L2 ERAD E3 ligase adaptor subunit///G protein-coupled receptor 37	-1.917	2.874
209635_at	AP1S1	adaptor related protein complex 1 sigma 1 subunit	-1.25	7.493
209642_at	BUB1	BUB1 mitotic checkpoint serine/threonine kinase	2.133	9.563
209643_s_at	PLD2	phospholipase D2	1.201	5.232
209651_at	TGFB1I1	transforming growth factor beta 1 induced transcript 1	2.999	7.972
209656_s_at	TMEM47	transmembrane protein 47	1.63	11.32
209662_at	CETN3	centrin 3	1.706	10.976
209670_at	TRAC	T-cell receptor alpha constant	2.066	5.08
209680_s_at	KIFC1	kinesin family member C1	1.151	8.049
209683_at	FAM49A	family with sequence similarity 49 member A	-1.504	10.119
209684_at	RIN2	Ras and Rab interactor 2	1.727	8.419
209685_s_at	PRKCB	protein kinase C beta	-5.674	21.023
209691_s_at	DOK4	docking protein 4	-1.855	5.407
209692_at	EYA2	EYA transcriptional coactivator and phosphatase 2	3.968	4.855
209710_at	GATA2	GATA binding protein 2	-1.368	5.191
209717_at	EVI5	ecotropic viral integration site 5	1.834	4.621
209726_at	CA11	carbonic anhydrase 11	-3.372	15.34
209728_at	HLA-DRB4	major histocompatibility complex, class II, DR beta 4	2.527	2.458
209732_at	CLEC2B	C-type lectin domain family 2 member B	2.023	4.444
209734_at	NCKAP1L	NCK associated protein 1 like	1.281	3.884
209755_at	NMNAT2	nicotinamide nucleotide adenylyltransferase 2	-2.374	7.824
209761_s_at	SP110	SP110 nuclear body protein	2.284	6.39
209764_at	MGAT3	mannosyl (beta-1,4-)-glycoprotein beta-1,4-N-acetylglucosaminyltransferase	-3.684	28.821
209765_at	ADAM19	ADAM metallopeptidase domain 19	-2.399	8.091
209768_s_at	SEPT5-GP1BB	SEPT5-GP1BB readthrough	-1.387	7.959
209771_x_at	CD24	CD24 molecule	3.213	7.879
209774_x_at	CXCL2	C-X-C motif chemokine ligand 2	4.564	6.762
209781_s_at	KHDRBS3	KH RNA binding domain containing, signal transduction associated 3	-1.902	8.396
209782_s_at	DBP	D-box binding PAR bZIP transcription factor	-2.226	8.977
209785_s_at	PLA2G4C	phospholipase A2 group IVC	-1.91	9.383
209786_at	HMGN4	high mobility group nucleosomal binding domain 4	1.287	5.686
209788_s_at	ERAP1	endoplasmic reticulum aminopeptidase 1	1.278	2.975
209790_s_at	CASP6	caspase 6	2.854	18.504
209791_at	PADI2	peptidyl arginine deiminase 2	-1.51	3.02
209793_at	GRIA1	glutamate ionotropic receptor AMPA type subunit 1	-1.45	2.079
209795_at	CD69	CD69 molecule	1.273	5.076
209818_s_at	HABP4	hyaluronan binding protein 4	-1.344	12.19
209822_s_at	VLDLR	very low density lipoprotein receptor	-1.291	1.655
209834_at	CHST3	carbohydrate sulfotransferase 3	2.333	9.003
209839_at	DNM3	dynamin 3	-5.581	23.709
209842_at	SOX10	SRY-box 10	-3.444	7.955
209846_s_at	BTN3A2	butyrophilin subfamily 3 member A2	2.761	7.569
209859_at	TRIM9	tripartite motif containing 9	-1.175	3.381
209861_s_at	METAP2	methionyl aminopeptidase 2	1.002	11.938
209869_at	ADRA2A	adrenoceptor alpha 2A	-2.225	5.79
209871_s_at	APBA2	amyloid beta precursor protein binding family A member 2	-2.061	13.208
209877_at	SNCG	synuclein gamma	-3.284	5.628
209883_at	COLGALT2	collagen beta(1-O)galactosyltransferase 2	-2.131	5.404
209889_at	SEC31B	SEC31 homolog B, COPII coat complex component	-2.115	1.678
209899_s_at	PUF60	poly(U) binding splicing factor 60	1.363	11.646
209917_s_at	TP53TG1	TP53 target 1 (non-protein coding)	1.593	7.074
209931_s_at	MFSD2B///FKBP1B	major facilitator superfamily domain containing 2B///FK506 binding protein 1B	-3.057	10.433
209946_at	VEGFC	vascular endothelial growth factor C	3.258	8.769
209948_at	KCNMB1	potassium calcium-activated channel subfamily M regulatory beta subunit 1	1.347	4.669
209949_at	NCF2	neutrophil cytosolic factor 2	1.28	4.751
209955_s_at	FAP	fibroblast activation protein alpha	2.945	16.493
209956_s_at	CAMK2B	calcium/calmodulin dependent protein kinase II beta	-3.635	15.485
209957_s_at	NPPA	natriuretic peptide A	-2.434	12.986
209975_at	CYP2E1	cytochrome P450 family 2 subfamily E member 1	-2.641	13.117
209981_at	CSDC2	cold shock domain containing C2	-2.867	7.401
209982_s_at	NRXN2	neurexin 2	-2.171	15.278
209988_s_at	ASCL1	achaete-scute family bHLH transcription factor 1	2.111	1.628
209990_s_at	GABBR2	gamma-aminobutyric acid type B receptor subunit 2	-2.851	5.795
209993_at	ABCB1	ATP binding cassette subfamily B member 1	-1.056	2.159
209998_at	PIGO	phosphatidylinositol glycan anchor biosynthesis class O	1.931	11.437
210004_at	OLR1	oxidized low density lipoprotein receptor 1	1.535	2.315
210010_s_at	SLC25A1	solute carrier family 25 member 1	1.824	6.765
210016_at	MYT1L	myelin transcription factor 1 like	-9.254	26.663
210033_s_at	SPAG6	sperm associated antigen 6	7.717	16.289
210038_at	PRKCQ	protein kinase C theta	-2.922	6.429
210040_at	SLC12A5	solute carrier family 12 member 5	-9.255	35.137
210046_s_at	IDH2	isocitrate dehydrogenase (NADP(+)) 2, mitochondrial	1.3	6.286
210052_s_at	TPX2	TPX2, microtubule nucleation factor	3.215	9.778
210053_at	TAF5	TATA-box binding protein associated factor 5	-1.432	3.894
210055_at	TSHR	thyroid stimulating hormone receptor	1.706	3.874
210056_at	RND1	Rho family GTPase 1	-2.622	13.616
210059_s_at	MAPK13	mitogen-activated protein kinase 13	-1.26	7.003
210073_at	ST8SIA1	ST8 alpha-N-acetyl-neuraminide alpha-2,8-sialyltransferase 1	1.271	3.292
210078_s_at	KCNAB1	potassium voltage-gated channel subfamily A member regulatory beta subunit 1	-4.391	22.759
210090_at	ARC	activity regulated cytoskeleton associated protein	-1.869	2.844
210092_at	MAGOHB///MAGOH	mago homolog B, exon junction complex core component///mago homolog, exon junction complex core component	1.634	12.882
210102_at	VWA5A	von Willebrand factor A domain containing 5A	1.868	5.389
210104_at	MED6	mediator complex subunit 6	1.008	4.051
210106_at	BLOC1S1-RDH5///RDH5	BLOC1S1-RDH5 readthrough///retinol dehydrogenase 5	1.674	9.145
210108_at	CACNA1D	calcium voltage-gated channel subunit alpha1 D	-3.669	10.068
210117_at	SPAG1	sperm associated antigen 1	3.728	11.33
210123_s_at	LOC101930361///LOC101929970///CHRFAM7A///CHRNA7	uncharacterized LOC101930361///CHRNA7-FAM7A fusion protein///CHRNA7 (exons 5-10) and FAM7A (exons A-E) fusion///cholinergic receptor nicotinic alpha 7 subunit	-1.299	3.327
210125_s_at	BANF1	barrier to autointegration factor 1	1.035	2.692
210132_at	EFNA3	ephrin A3	-2.01	9.386
210138_at	RGS20	regulator of G-protein signaling 20	-1.98	5.079
210145_at	PLA2G4A	phospholipase A2 group IVA	2.288	4.254
210151_s_at	DYRK3	dual specificity tyrosine phosphorylation regulated kinase 3	2.083	8.219
210166_at	TLR5	toll like receptor 5	1.286	3.332
210168_at	C6	complement component 6	1.131	2.732
210169_at	SEC14L5	SEC14 like lipid binding 5	-5.664	25.922
210176_at	TLR1	toll like receptor 1	3.141	19.297
210179_at	KCNJ13	potassium voltage-gated channel subfamily J member 13	1.119	3.165
210185_at	CACNB1	calcium voltage-gated channel auxiliary subunit beta 1	-2.006	4.064
210191_s_at	PHTF1	putative homeodomain transcription factor 1	1.846	5.197
210193_at	MOBP	myelin-associated oligodendrocyte basic protein	-3.588	14.612
210198_s_at	PLP1	proteolipid protein 1	-3.532	8.833
210201_x_at	BIN1	bridging integrator 1	-1.57	11.296
210215_at	TFR2	transferrin receptor 2	-1.229	6.388
210220_at	FZD2	frizzled class receptor 2	3.019	13.969
210221_at	CHRNA3	cholinergic receptor nicotinic alpha 3 subunit	-2.638	6.912
210227_at	DLGAP2	DLG associated protein 2	-5.391	18.061
210234_at	GRM4	glutamate metabotropic receptor 4	-1.121	4.24
210239_at	IRX5	iroquois homeobox 5	2.994	5.819
210240_s_at	CDKN2D	cyclin dependent kinase inhibitor 2D	-3.784	18.456
210246_s_at	ABCC8	ATP binding cassette subfamily C member 8	-4.409	16.099
210252_s_at	MADD	MAP kinase activating death domain	-2.613	30.477
[truncated: 3,782 more rows]

## Sheet: PA
Differentially Expressed Genes in PA (Figure A4c)
Probe ID	Gene symbol	Gene description	log2(fold change)	-LOG10(Pvalue)
1405_i_at	CCL5	C-C motif chemokine ligand 5	1.297	2.172
1552301_a_at	CORO6	coronin 6	-4.57	12.263
1552316_a_at	GIMAP1	GTPase, IMAP family member 1	1.465	3.403
1552365_at	SCIN	scinderin	5.15	10.839
1552386_at	GAPT	GRB2-binding adaptor protein, transmembrane	1.714	6.394
1552400_a_at	TMEM266	transmembrane protein 266	-1.867	4.759
1552422_at	C10orf25	chromosome 10 open reading frame 25	1.703	3.862
1552439_s_at	MEGF11	multiple EGF like domains 11	4.919	6.935
1552504_a_at	BRSK1	BR serine/threonine kinase 1	-1.306	2.69
1552521_a_at	TMEM74	transmembrane protein 74	-2.388	6.528
1552557_a_at	ZDHHC15	zinc finger DHHC-type containing 15	3.014	12.083
1552689_at	CASKIN1	CASK interacting protein 1	-3.475	11.656
1552703_s_at	CARD16///CASP1	caspase recruitment domain family member 16///caspase 1	1.168	2.398
1552714_at	CREG2	cellular repressor of E1A stimulated genes 2	-5.068	7.292
1552807_a_at	SIGLEC10	sialic acid binding Ig like lectin 10	1.752	2.598
1552879_a_at	ATOH7	atonal bHLH transcription factor 7	-1.911	5.75
1552897_a_at	KCNG3	potassium voltage-gated channel modifier subfamily G member 3	-1.924	4.438
1552946_at	ZNF114	zinc finger protein 114	2.27	10.477
1552953_a_at	NEUROD2	neuronal differentiation 2	-3.294	3.747
1552977_a_at	CNPY3	canopy FGF signaling regulator 3	1.661	5.479
1553126_a_at	SLC39A12	solute carrier family 39 member 12	-3.709	4.989
1553185_at	RASEF	RAS and EF-hand domain containing	-1.31	1.918
1553254_at	MAGEE2	MAGE family member E2	-1.943	2.715
1553257_at	GAL3ST3	galactose-3-O-sulfotransferase 3	1.366	2.921
1553288_a_at	NYAP1	neuronal tyrosine phosphorylated phosphoinositide-3-kinase adaptor 1	-2.056	2.566
1553292_s_at	SGK494	uncharacterized serine/threonine-protein kinase SgK494	-3.373	7.533
1553297_a_at	CSF3R	colony stimulating factor 3 receptor	1.134	2.75
1553314_a_at	KIF19	kinesin family member 19	1.289	1.933
1553321_a_at	SULT1C4	sulfotransferase family 1C member 4	1.865	2.339
1553357_at	LINC00889	long intergenic non-protein coding RNA 889	-5.014	9.097
1553410_a_at	ABCC12	ATP binding cassette subfamily C member 12	-1.789	4.943
1553420_at	SATB2-AS1	SATB2 antisense RNA 1	-1.473	5.731
1553426_at	C5orf64	chromosome 5 open reading frame 64	1.157	3.698
1553587_a_at	POLE4	DNA polymerase epsilon 4, accessory subunit	-1.326	4.792
1553611_s_at	KLHL35	kelch like family member 35	-2.506	4.699
1553614_a_at	LINC01198	long intergenic non-protein coding RNA 1198	1.291	1.771
1553955_at	PPP1R21	protein phosphatase 1 regulatory subunit 21	-1.288	5.136
1553956_at	TMEM237	transmembrane protein 237	1.132	4.331
1553978_at	BORCS8	BLOC-1 related complex subunit 8	1.962	5.454
1553990_at	BRICD5	BRICHOS domain containing 5	-1.269	1.939
1553997_a_at	ASPHD1	aspartate beta-hydroxylase domain containing 1	-5.744	11.518
1553998_at	DMRTC1B///DMRTC1	DMRT like family C1B///DMRT like family C1	-1.411	3.884
1554012_at	RSPO2	R-spondin 2	-2.996	4.025
1554079_at	GALNT18	polypeptide N-acetylgalactosaminyltransferase 18	-3.232	7.818
1554143_a_at	SUGT1P3	SGT1 homolog, MIS12 kinetochore complex assembly cochaperone pseudogene 3	-1.531	2.984
1554176_a_at	C3orf33	chromosome 3 open reading frame 33	1.269	4.156
1554181_at	SNX32	sorting nexin 32	-3.794	4.618
1554228_a_at	BAALC-AS2	BAALC antisense RNA 2	1.473	2.844
1554298_a_at	WDR49	WD repeat domain 49	1.579	1.962
1554299_at	NPAS4	neuronal PAS domain protein 4	-4.529	4.684
1554414_a_at	OSGIN2	oxidative stress induced growth inhibitor family member 2	1.212	1.662
1554479_a_at	CARD8	caspase recruitment domain family member 8	2.414	5.998
1554526_at	OLFM3	olfactomedin 3	-6.298	15.267
1554542_at	SLC25A48	solute carrier family 25 member 48	-1.635	6.458
1554588_a_at	TTC30B	tetratricopeptide repeat domain 30B	2.101	7.716
1554593_s_at	SLC1A6	solute carrier family 1 member 6	-4.652	3.898
1554627_a_at	ASCC1	activating signal cointegrator 1 complex subunit 1	1.19	3.92
1554640_at	PALM2	paralemmin 2	-4.493	8.727
1554655_a_at	RPRML	reprimo like	-3.013	7.349
1554706_at	OR2L13	olfactory receptor family 2 subfamily L member 13	-3.113	6.134
1554801_at	FNDC9	fibronectin type III domain containing 9	-3.634	8.877
1555041_a_at	NAGA	alpha-N-acetylgalactosaminidase	2.798	10.306
1555112_a_at	CCDC181	coiled-coil domain containing 181	-1.401	2.336
1555268_a_at	GRID1	glutamate ionotropic receptor delta type subunit 1	1.062	3.431
1555310_a_at	PAK6	p21 (RAC1) activated kinase 6	-4.507	5.978
1555385_at	B4GALNT1	beta-1,4-N-acetyl-galactosaminyltransferase 1	-2.484	4.188
1555412_at	FBXL21	F-box and leucine rich repeat protein 21 (gene/pseudogene)	-1.145	3.469
1555509_a_at	SLC25A41	solute carrier family 25 member 41	-1.158	3.995
1555575_a_at	KDELR1	KDEL endoplasmic reticulum protein retention receptor 1	1.047	6.339
1555743_s_at	ERVH-6	endogenous retrovirus group H member 6	1.1	2.888
1555752_at	STH	saitohin	-1.179	3.185
1555844_s_at	HNRNPM	heterogeneous nuclear ribonucleoprotein M	1.054	8.728
1555852_at	PSMB8-AS1	PSMB8 antisense RNA 1 (head to head)	4.643	12.976
1555867_at	GNG4	G protein subunit gamma 4	-2.181	2.804
1555889_a_at	CRTAP	cartilage associated protein	1.805	3.774
1555907_at	AGAP2-AS1	AGAP2 antisense RNA 1	1.212	4.658
1555962_at	B3GNT7	UDP-GlcNAc:betaGal beta-1,3-N-acetylglucosaminyltransferase 7	4.376	8.968
1556001_at	LOC284939///MAPK8IP2	uncharacterized LOC284939///mitogen-activated protein kinase 8 interacting protein 2	-2.978	6.832
1556039_s_at	GPR173	G protein-coupled receptor 173	1.781	3.926
1556047_s_at	MAGEE1	MAGE family member E1	-2.308	7.499
1556057_s_at	NEUROD1	neuronal differentiation 1	-4.957	3.728
1556064_at	LOC284926	uncharacterized LOC284926	1.521	4.057
1556096_s_at	UNC13C	unc-13 homolog C	-8.639	16.443
1556097_at	HOMER2	homer scaffolding protein 2	-3.869	9.074
1556117_at	LINC01260	long intergenic non-protein coding RNA 1260	-1.301	3.748
1556123_a_at	RAB11B-AS1	RAB11B antisense RNA 1	1.095	3.121
1556145_a_at	LOC100131170	uncharacterized LOC100131170	-2.45	2.633
1556178_x_at	TAF8	TATA-box binding protein associated factor 8	1.069	3.716
1556235_at	CH17-408M7.1///LOC101929257///LOC101927468	uncharacterized LOC102724558///uncharacterized LOC101929257///uncharacterized LOC101927468	1.821	6.359
1556244_s_at	LOC375196	uncharacterized LOC375196	-2.287	5.568
1556267_at	MYRFL	myelin regulatory factor-like	2.184	5.708
1556308_at	PRRT3	proline rich transmembrane protein 3	-2.236	4.807
1556319_at	TRIM44	tripartite motif containing 44	-1.251	3.546
1556351_at	HCN1	hyperpolarization activated cyclic nucleotide gated potassium channel 1	-6.556	13.273
1556366_s_at	LY86-AS1	LY86 antisense RNA 1	-3.519	6.071
1556377_s_at	LMO7	LIM domain 7	-1.562	4.899
1556414_at	LINC00515	long intergenic non-protein coding RNA 515	-1.24	6.599
1556425_a_at	LOC284219	uncharacterized LOC284219	-1.967	3.991
1556427_s_at	LRRN4CL	LRRN4 C-terminal like	3.59	9.186
1556435_at	LOC400622	uncharacterized LOC400622	-1.044	3.543
1556444_a_at	LOC100288310	uncharacterized LOC100288310	-3.971	9.27
1556499_s_at	COL1A1	collagen type I alpha 1 chain	3.468	4.094
1556579_s_at	IGSF10	immunoglobulin superfamily member 10	-1.343	1.856
1556588_at	ST20-AS1	ST20 antisense RNA 1	1.42	4.511
1556598_at	ARPP21	cAMP regulated phosphoprotein 21	2.229	2.331
1556599_s_at	ARPP21	cAMP regulated phosphoprotein 21	1.999	3.409
1556633_at	C1orf204	chromosome 1 open reading frame 204	-2.421	3.009
1556641_at	SLC7A14	solute carrier family 7 member 14	-4.127	10.957
1556798_a_at	RNF144A-AS1	RNF144A antisense RNA 1	-1.689	6.068
1556821_x_at	DLEU2	deleted in lymphocytic leukemia 2 (non-protein coding)	2.12	3.415
1556827_at	LPP-AS2	LPP antisense RNA 2	1.251	4.208
1556941_a_at	LOC283484	uncharacterized LOC283484	-2.916	5.641
1556988_s_at	CHD1L	chromodomain helicase DNA binding protein 1 like	1.223	4.083
1557014_a_at	FAM201A	family with sequence similarity 201 member A	-1.138	2.153
1557049_at	BTBD19	BTB domain containing 19	1.181	5.298
1557073_s_at	TTBK2	tau tubulin kinase 2	-1.713	6.572
1557098_s_at	HAR1A	highly accelerated region 1A (non-protein coding)	-3.636	14.511
1557107_at	SLC26A4-AS1	SLC26A4 antisense RNA 1	-3.957	5.925
1557113_at	LOC283588	uncharacterized LOC283588	-2.456	4.125
1557116_at	APOL6	apolipoprotein L6	2.759	7.858
1557122_s_at	GABRB2	gamma-aminobutyric acid type A receptor beta2 subunit	-5.781	7.661
1557123_a_at	CHADL	chondroadherin like	2.569	3.84
1557133_at	LINC00632	long intergenic non-protein coding RNA 632	-3.146	8.996
1557136_at	ATP13A4	ATPase 13A4	1.211	1.85
1557143_at	CSMD2	CUB and Sushi multiple domains 2	1.234	3.498
1557166_at	PDCD4	programmed cell death 4 (neoplastic transformation inhibitor)	-2.388	6.864
1557181_s_at	C11orf87	chromosome 11 open reading frame 87	-5.908	12.208
1557203_at	PABPC1L2B///PABPC1L2A	poly(A) binding protein cytoplasmic 1 like 2B///poly(A) binding protein cytoplasmic 1 like 2A	-2.262	5.654
1557215_at	LINC00648	long intergenic non-protein coding RNA 648	2.769	7.317
1557283_a_at	ZNF519	zinc finger protein 519	-1.838	4.261
1557359_at	LINC01268	long intergenic non-protein coding RNA 1268	1.27	5.81
1557410_at	LOC100506606	uncharacterized LOC100506606	1.425	4.83
1557411_s_at	SLC25A43	solute carrier family 25 member 43	3.646	9.532
1557430_at	SMIM17	small integral membrane protein 17	-4.365	13.952
1557451_at	DGCR10	DiGeorge syndrome critical region gene 10 (non-protein coding)	-1.063	2.788
1557458_s_at	SHB	SH2 domain containing adaptor protein B	1.237	2.7
1557474_at	LOC284578	uncharacterized LOC284578	-3.007	9.049
1557475_at	LINC00507	long intergenic non-protein coding RNA 507	-4.37	5.893
1557545_s_at	RNF165	ring finger protein 165	-2.832	7.003
1557617_at	DCTN1-AS1	DCTN1 antisense RNA 1	-4.224	12.602
1557636_a_at	C7orf57	chromosome 7 open reading frame 57	1.171	2.157
1557948_at	PHLDB3	pleckstrin homology like domain family B member 3	1.193	4.405
1558041_a_at	KIAA0895L	KIAA0895 like	-1.352	3.451
1558077_s_at	MDH1B	malate dehydrogenase 1B	-1.428	2.315
1558118_at	LOC100287576///DGCR5	uncharacterized LOC100287576///DiGeorge syndrome critical region gene 5 (non-protein coding)	-1.94	7.218
1558123_at	LINC00957	long intergenic non-protein coding RNA 957	-1.769	2.431
1558195_at	LINC00592	long intergenic non-protein coding RNA 592	-1.58	5.653
1558256_at	LINC00662	long intergenic non-protein coding RNA 662	1.564	4.763
1558290_a_at	MIR1204///PVT1	microRNA 1204///Pvt1 oncogene (non-protein coding)	2.21	8.639
1558322_a_at	PAQR9	progestin and adipoQ receptor family member 9	-1.143	2.738
1558368_s_at	DRAXIN	dorsal inhibitory axon guidance protein	2.749	4.714
1558404_at	LINC00622	long intergenic non-protein coding RNA 622	-3.15	4.532
1558411_at	EGFEM1P	EGF like and EMI domain containing 1, pseudogene	1.128	3.93
1558414_at	FRRS1L	ferric chelate reductase 1 like	-1.611	1.673
1558508_a_at	C1orf53	chromosome 1 open reading frame 53	-2.523	3.094
1558530_at	LRTM2	leucine rich repeats and transmembrane domains 2	-3.142	9.44
1558569_at	LOC100131541	uncharacterized LOC100131541	2.097	4.18
1558620_at	ZNF621	zinc finger protein 621	2.186	8.017
1558685_a_at	CH17-340M24.3	uncharacterized protein BC009467	-1.059	2.175
1558692_at	GLMP	glycosylated lysosomal membrane protein	1.125	3.408
1558700_s_at	ZNF260	zinc finger protein 260	1.398	5.537
1558795_at	LOC101928307	uncharacterized LOC101928307	-1.124	2.326
1558971_at	THEMIS	thymocyte selection associated	-1.373	2.837
1559033_at	LINC01018	long intergenic non-protein coding RNA 1018	-1.299	2.805
1559034_at	SIRPB2	signal regulatory protein beta 2	1.54	4.959
1559141_s_at	FAM87B///FAM87A	family with sequence similarity 87 member B///family with sequence similarity 87 member A	-1.332	3.354
1559194_a_at	CLEC4GP1	C-type lectin domain family 4 member G pseudogene 1	-1.368	5.255
1559545_at	LOC101930404///SNORD116-28///SNORD115-26///SNORD115-13///SNORD115-7///SNORD116-22///SNORD116-4///PWARSN///SNORD107///SNRPN///IPW	uncharacterized LOC101930404///small nucleolar RNA, C/D box 116-28///small nucleolar RNA, C/D box 115-26///small nucleolar RNA, C/D box 115-13///small nucleolar RNA, C/D box 115-7///small nucleolar RNA, C/D box 116-22///small nucleolar RNA, C/D box 116-4///Prader Willi/Angelman region RNA, SNRPN neighbor///small nucleolar RNA, C/D box 107///small nuclear ribonucleoprotein polypeptide N///imprinte…	-4.099	10.277
1559584_a_at	C16orf54	chromosome 16 open reading frame 54	1.863	5.248
1559591_s_at	CHDH	choline dehydrogenase	1.364	3.328
1559603_at	GPR12	G protein-coupled receptor 12	-1.102	2.74
1559617_at	LOC101927206	uncharacterized LOC101927206	4	3.974
1559650_at	JAZF1-AS1	JAZF1 antisense RNA 1	-1.265	6.063
1559760_at	LOC401220	uncharacterized LOC401220	-3.098	8.42
1560522_at	DLGAP1-AS3	DLGAP1 antisense RNA 3	-1.48	5.223
1560562_a_at	ZNF677	zinc finger protein 677	1.92	7.646
1560676_at	SIAH3	siah E3 ubiquitin protein ligase family member 3	-2.076	7.395
1560692_at	VSTM2A-OT1///VSTM2A	VSTM2A overlapping transcript 1///V-set and transmembrane domain containing 2A	-3.812	6.341
1560698_a_at	TRHDE-AS1	TRHDE antisense RNA 1	-2.128	1.949
1561394_s_at	KIAA1755	KIAA1755	1.56	1.688
1561403_at	SOHLH1	spermatogenesis and oogenesis specific basic helix-loop-helix 1	-1.884	5.777
1561666_a_at	PSMG3-AS1	PSMG3 antisense RNA 1 (head to head)	-1.373	2.393
1561985_at	C14orf39	chromosome 14 open reading frame 39	1.552	2.431
1562013_a_at	LOC100506730	uncharacterized LOC100506730	-1.472	5.573
1562386_s_at	ZNF501	zinc finger protein 501	1.569	5.311
1562433_at	LINC01181	long intergenic non-protein coding RNA 1181	1.03	3.575
1562733_at	LINC00092	long intergenic non-protein coding RNA 92	2.009	3.73
1563022_at	CCDC160	coiled-coil domain containing 160	1.839	4.45
1563182_at	ACVR1C	activin A receptor type 1C	-2.413	3.057
1563367_at	MAPT-AS1	MAPT antisense RNA 1	-2.015	3.314
1563638_at	TVP23A	trans-golgi network vesicle protein 23 homolog A	1.242	2.577
1563646_a_at	TMEM67	transmembrane protein 67	2.461	6.556
1563658_a_at	SYT9	synaptotagmin 9	-2.438	2.765
1563770_at	ZBTB8B	zinc finger and BTB domain containing 8B	1.291	4.714
1563899_at	LCTL	lactase like	1.006	4.825
1563933_a_at	PLD5	phospholipase D family member 5	2.349	1.976
1564031_a_at	RELL2	RELT like 2	-3.717	6.71
1564207_at	LINC00957	long intergenic non-protein coding RNA 957	-1.443	4.828
1564559_at	LOC728073	uncharacterized LOC728073	-1.416	5.059
1566219_at	KRTAP5-AS1	KRTAP5-1/KRTAP5-2 antisense RNA 1	-2.611	9.379
1566968_at	SPRY4-IT1	SPRY4 intronic transcript 1	3.273	6.251
1568604_a_at	CADPS	calcium dependent secretion activator	-1.695	5.375
1568612_at	GABRG2	gamma-aminobutyric acid type A receptor gamma2 subunit	-9.324	19.484
1568625_at	SVOP	SV2 related protein	-3.626	9.555
1568683_at	SNAI3-AS1	SNAI3 antisense RNA 1	-1.184	8.112
1568768_s_at	BRE-AS1	BRE antisense RNA 1	-1.612	1.668
1568838_at	WASIR2	WASH and IL9R antisense RNA 2	-2.14	7.456
1568868_at	CYP27C1	cytochrome P450 family 27 subfamily C member 1	1.265	2.218
1568870_at	SLC24A4	solute carrier family 24 member 4	-4.088	9.73
1568933_at	LYPD8	LY6/PLAUR domain containing 8	-1.949	5.339
1569003_at	VMP1	vacuole membrane protein 1	2.465	7.956
1569107_s_at	ZFP69	ZFP69 zinc finger protein	1.473	4.797
1569110_x_at	LOC728613	programmed cell death 6 pseudogene	4.628	4.839
1569157_s_at	LOC100505555///ZNF846	uncharacterized LOC100505555///zinc finger protein 846	1.076	2.784
1569256_a_at	FAM43B	family with sequence similarity 43 member B	-1.736	3.891
1569369_at	ZFYVE28	zinc finger FYVE-type containing 28	-2.649	5.184
1569648_at	DACT2	dishevelled binding antagonist of beta catenin 2	1.873	4.231
1569868_s_at	EME2	essential meiotic structure-specific endonuclease subunit 2	-2.002	5.54
1569872_a_at	LMF1	lipase maturation factor 1	1.289	2.265
1569905_at	HSD11B1L	hydroxysteroid 11-beta dehydrogenase 1 like	-1.321	3.173
1570253_a_at	RHEBL1	Ras homolog enriched in brain like 1	-2.568	6.212
1570255_s_at	ANKRD20A12P///ANKRD20A8P///ANKRD20A4///ANKRD20A2///ANKRD20A3///ANKRD20A5P///ANKRD20A1	ankyrin repeat domain 20 family member A12, pseudogene///ankyrin repeat domain 20 family member A8, pseudogene///ankyrin repeat domain 20 family member A4///ankyrin repeat domain 20 family member A2///ankyrin repeat domain 20 family member A3///ankyrin repeat domain 20 family member A5, pseudogene///ankyrin repeat domain 20 family member A1	1.806	3.666
200015_s_at	45171	septin 2	1.035	7.842
200075_s_at	GUK1	guanylate kinase 1	-1.085	5.17
200600_at	MSN	moesin	2.082	8.421
200617_at	MLEC	malectin	1.448	5.091
200621_at	CSRP1	cysteine and glycine rich protein 1	-1.265	3.902
200634_at	PFN1	profilin 1	1.646	5.417
200649_at	NUCB1	nucleobindin 1	1.566	2.714
200651_at	SNORD96A///SNORD95///RACK1	small nucleolar RNA, C/D box 96A///small nucleolar RNA, C/D box 95///receptor for activated C kinase 1	1.028	7.116
200656_s_at	P4HB	prolyl 4-hydroxylase subunit beta	1.685	3.546
200660_at	S100A11	S100 calcium binding protein A11	2.887	6.821
200663_at	CD63	CD63 molecule	1.664	10.989
200665_s_at	SPARC	secreted protein acidic and cysteine rich	2.358	9.303
200670_at	XBP1	X-box binding protein 1	1.009	2.982
200675_at	CD81	CD81 molecule	1.012	5.675
200677_at	PTTG1IP	pituitary tumor-transforming 1 interacting protein	1.5	8.781
200678_x_at	GRN	granulin	1.709	5.748
200696_s_at	GSN	gelsolin	1.711	3.779
200698_at	KDELR2	KDEL endoplasmic reticulum protein retention receptor 2	1.782	9.291
200701_at	NPC2	NPC intracellular cholesterol transporter 2	1.861	6.694
200704_at	LITAF	lipopolysaccharide induced TNF factor	2.081	6.818
200708_at	GOT2	glutamic-oxaloacetic transaminase 2	-1.254	6.754
200713_s_at	MAPRE1	microtubule associated protein RP/EB family member 1	1.17	7.771
200714_x_at	OS9	OS9, endoplasmic reticulum lectin	1.095	5.649
200723_s_at	CAPRIN1	cell cycle associated protein 1	1.228	6.541
200733_s_at	PTP4A1	protein tyrosine phosphatase type IVA, member 1	1.253	4.774
200736_s_at	GPX1	glutathione peroxidase 1	1.146	5.818
200771_at	LAMC1	laminin subunit gamma 1	1.518	4.537
200782_at	ANXA5	annexin A5	2.409	12.239
200783_s_at	STMN1	stathmin 1	-1.402	6.978
200785_s_at	LRP1	LDL receptor related protein 1	2.398	6.951
200791_s_at	IQGAP1	IQ motif containing GTPase activating protein 1	1.399	4.966
200793_s_at	ACO2	aconitase 2	-1.107	6.724
200805_at	LMAN2	lectin, mannose binding 2	1.039	3.327
200808_s_at	ZYX	zyxin	1.886	2.561
200814_at	PSME1	proteasome activator subunit 1	1.104	6.982
200827_at	PLOD1	procollagen-lysine,2-oxoglutarate 5-dioxygenase 1	1.195	3.277
200872_at	S100A10	S100 calcium binding protein A10	3.365	11.99
200884_at	CKB	creatine kinase B	-1.569	7.88
200885_at	RHOC	ras homolog family member C	2.679	10.955
200887_s_at	STAT1	signal transducer and activator of transcription 1	1.649	10.802
200891_s_at	SSR1	signal sequence receptor subunit 1	1.81	12.77
200895_s_at	FKBP4	FK506 binding protein 4	-1.553	8.33
200897_s_at	PALLD	palladin, cytoskeletal associated protein	1.553	7.562
200902_at	45184	15 kDa selenoprotein	1.341	6.335
200905_x_at	HLA-E	major histocompatibility complex, class I, E	1.226	4.927
200916_at	TAGLN2	transgelin 2	1.556	3.427
200923_at	LGALS3BP	galectin 3 binding protein	3.103	6.889
200943_at	HMGN1	high mobility group nucleosome binding domain 1	1.109	6.885
200967_at	PPIB	peptidylprolyl isomerase B	1.299	7.196
200978_at	MDH1	malate dehydrogenase 1	-1.417	8.839
200985_s_at	CD59	CD59 molecule	1.393	11.165
200986_at	SERPING1	serpin family G member 1	3.698	13.861
201004_at	SSR4	signal sequence receptor subunit 4	1.154	6.502
201005_at	CD9	CD9 molecule	2.002	6.461
201011_at	RPN1	ribophorin I	1.395	5.574
201012_at	ANXA1	annexin A1	2.903	7.322
201020_at	YWHAH	tyrosine 3-monooxygenase/tryptophan 5-monooxygenase activation protein eta	-2.143	7.315
201029_s_at	CD99	CD99 molecule	1.445	4.191
201032_at	BLCAP	bladder cancer associated protein	-1.084	9.447
201037_at	PFKP	phosphofructokinase, platelet	-1.14	4.66
201040_at	GNAI2	G protein subunit alpha i2	1.247	2.498
201053_s_at	PSMF1	proteasome inhibitor subunit 1	1.221	10.205
201063_at	RCN1	reticulocalbin 1	1.367	6.066
201069_at	MMP2	matrix metallopeptidase 2	2.812	5.175
201074_at	SMARCC1	SWI/SNF related, matrix associated, actin dependent regulator of chromatin subfamily c member 1	1.178	7.189
201087_at	PXN	paxillin	1.986	6.061
201095_at	DAP	death associated protein	1.137	4.822
201105_at	LGALS1	galectin 1	1.153	3.235
201128_s_at	ACLY	ATP citrate lyase	1.136	7.442
201131_s_at	CDH1	cadherin 1	4.75	11.787
201136_at	PLP2	proteolipid protein 2	4.055	8.365
201137_s_at	HLA-DPB1	major histocompatibility complex, class II, DP beta 1	2.828	6.59
201141_at	GPNMB	glycoprotein nmb	1.777	1.689
201146_at	NFE2L2	nuclear factor, erythroid 2 like 2	1.146	6.603
201150_s_at	TIMP3	TIMP metallopeptidase inhibitor 3	2.05	9.04
201160_s_at	YBX3	Y-box binding protein 3	1.079	3.857
201162_at	IGFBP7	insulin like growth factor binding protein 7	1.93	7.58
201178_at	FBXO7	F-box protein 7	1.119	3.504
201180_s_at	GNAI3	G protein subunit alpha i3	1.127	5.339
201185_at	HTRA1	HtrA serine peptidase 1	1.142	4.414
201189_s_at	ITPR3	inositol 1,4,5-trisphosphate receptor type 3	2.369	4.192
201193_at	IDH1	isocitrate dehydrogenase (NADP(+)) 1, cytosolic	1.375	10.035
201204_s_at	RRBP1	ribosome binding protein 1	1.941	6.769
201209_at	HDAC1	histone deacetylase 1	1.489	6.882
201236_s_at	BTG2	BTG anti-proliferation factor 2	1.559	2.872
201242_s_at	ATP1B1	ATPase Na+/K+ transporting subunit beta 1	-2.727	10.44
201250_s_at	SLC2A1	solute carrier family 2 member 1	-1.29	3.801
201270_x_at	NUDCD3	NudC domain containing 3	-1.4	9.062
201278_at	LOC101926921///DAB2	uncharacterized LOC101926921///DAB2, clathrin adaptor protein	3.003	8.676
201288_at	ARHGDIB	Rho GDP dissociation inhibitor beta	1.806	5.864
201290_at	SEC11A	SEC11 homolog A, signal peptidase complex subunit	1.424	11.37
201292_at	TOP2A	topoisomerase (DNA) II alpha	3.186	7.395
201310_s_at	NREP	neuronal regeneration related protein	-2.216	6.206
201313_at	ENO2	enolase 2	-2.383	9.196
201315_x_at	IFITM2	interferon induced transmembrane protein 2	1.206	3.242
201319_at	MYL12A	myosin light chain 12A	1.195	6.143
201324_at	EMP1	epithelial membrane protein 1	3.535	9.086
201341_at	ENC1	ectodermal-neural cortex 1	-3.048	3.548
201348_at	GPX3	glutathione peroxidase 3	3.443	5.89
201349_at	SLC9A3R1	SLC9A3 regulator 1	-1.031	2.39
201368_at	ZFP36L2	ZFP36 ring finger protein like 2	1.957	9.887
201376_s_at	HNRNPF	heterogeneous nuclear ribonucleoprotein F	1.07	3.842
201387_s_at	UCHL1	ubiquitin C-terminal hydrolase L1	-1.742	7.392
201389_at	ITGA5	integrin subunit alpha 5	1.946	2.512
201398_s_at	TRAM1	translocation associated membrane protein 1	1.335	8.356
201412_at	LRP10	LDL receptor related protein 10	2.088	9.814
201417_at	SOX4	SRY-box 4	1.284	1.665
201419_at	BAP1	BRCA1 associated protein 1	-1.302	5.109
201422_at	IFI30///PIK3R2	IFI30, lysosomal thiol reductase///phosphoinositide-3-kinase regulatory subunit 2	2.374	5.568
201426_s_at	VIM	vimentin	2.912	10.536
201431_s_at	DPYSL3	dihydropyrimidinase like 3	2.209	8.651
201438_at	COL6A3	collagen type VI alpha 3 chain	2.497	2.307
201445_at	CNN3	calponin 3	1.463	5.204
201474_s_at	ITGA3	integrin subunit alpha 3	2.658	5.895
201482_at	QSOX1	quiescin sulfhydryl oxidase 1	2.22	7.764
201487_at	CTSC	cathepsin C	3.367	12.097
201502_s_at	NFKBIA	NFKB inhibitor alpha	1.252	3.919
201505_at	LAMB1	laminin subunit beta 1	1.212	1.952
201506_at	TGFBI	transforming growth factor beta induced	2.09	2.743
201508_at	IGFBP4	insulin like growth factor binding protein 4	2.077	2.466
201525_at	APOD	apolipoprotein D	2.928	6.68
201536_at	DUSP3	dual specificity phosphatase 3	-1.59	9.613
201560_at	CLIC4	chloride intracellular channel 4	1.908	6.567
201563_at	SORD	sorbitol dehydrogenase	1.273	4.183
201576_s_at	TMPPE///GLB1	transmembrane protein with metallophosphoesterase domain///galactosidase beta 1	1.281	7.701
201578_at	PODXL	podocalyxin like	1.527	6.81
201584_s_at	DDX39A	DEAD-box helicase 39A	1.071	4.4
201586_s_at	SFPQ	splicing factor proline and glutamine rich	1.229	5.337
201587_s_at	IRAK1	interleukin 1 receptor associated kinase 1	1.165	6.208
201589_at	SMC1A	structural maintenance of chromosomes 1A	1.22	4.732
201591_s_at	NISCH	nischarin	-1.048	5.97
201594_s_at	PPP4R1	protein phosphatase 4 regulatory subunit 1	1.311	9.51
201596_x_at	KRT18	keratin 18	-1.221	1.846
201598_s_at	INPPL1	inositol polyphosphate phosphatase like 1	1.404	4.935
201601_x_at	IFITM2///IFITM1	interferon induced transmembrane protein 2///interferon induced transmembrane protein 1	1.205	2.388
201613_s_at	AP1G2	adaptor related protein complex 1 gamma 2 subunit	-1.971	4.389
201621_at	NBL1	neuroblastoma 1, DAN family BMP antagonist	-1.396	2.782
201631_s_at	IER3	immediate early response 3	2.881	3.936
201641_at	BST2	bone marrow stromal cell antigen 2	1.277	2.367
201645_at	TNC	tenascin C	2.831	3.566
201649_at	UBE2L6	ubiquitin conjugating enzyme E2 L6	1.25	5.602
201655_s_at	HSPG2	heparan sulfate proteoglycan 2	3.353	6.512
201664_at	SMC4	structural maintenance of chromosomes 4	1.229	4.725
201666_at	TIMP1	TIMP metallopeptidase inhibitor 1	3.834	10.916
201667_at	GJA1	gap junction protein alpha 1	-1.269	4.544
201669_s_at	MARCKS	myristoylated alanine rich protein kinase C substrate	1.225	6.545
201690_s_at	TPD52	tumor protein D52	-1.034	5.949
201721_s_at	LAPTM5	lysosomal protein transmembrane 5	1.67	6.271
201722_s_at	GALNT1	polypeptide N-acetylgalactosaminyltransferase 1	1.004	4.403
201726_at	ELAVL1	ELAV like RNA binding protein 1	1.558	7.037
201739_at	SGK1	serum/glucocorticoid regulated kinase 1	2.003	3.735
201743_at	CD14	CD14 molecule	1.479	2.416
201744_s_at	LUM	lumican	2.667	3.149
201745_at	TWF1	twinfilin actin binding protein 1	1.347	3.798
201746_at	TP53	tumor protein p53	3.036	6.674
201751_at	JOSD1	Josephin domain containing 1	-1.277	9.048
201760_s_at	WSB2	WD repeat and SOCS box containing 2	-1.025	4.563
201761_at	MTHFD2	methylenetetrahydrofolate dehydrogenase (NADP+ dependent) 2, methenyltetrahydrofolate cyclohydrolase	2.021	5.686
201762_s_at	MIR7703///PSME2	microRNA 7703///proteasome activator subunit 2	1.323	8.443
201765_s_at	HEXA	hexosaminidase subunit alpha	1.154	5.272
201780_s_at	RNF13	ring finger protein 13	1.193	6.724
201783_s_at	RELA	RELA proto-oncogene, NF-kB subunit	1.256	4.387
201785_at	RNASE1	ribonuclease A family member 1, pancreatic	-2.089	2.785
201790_s_at	DHCR7	7-dehydrocholesterol reductase	1.494	2.944
201792_at	AEBP1	AE binding protein 1	3.317	7.182
201795_at	LBR	lamin B receptor	1.597	8.061
201797_s_at	VARS	valyl-tRNA synthetase	1.648	7.785
201798_s_at	MYOF	myoferlin	2.715	6.395
201801_s_at	SLC29A1	solute carrier family 29 member 1 (Augustine blood group)	2.312	2.89
201811_x_at	SH3BP5	SH3 domain binding protein 5	-1.699	5.183
201837_s_at	SUPT7L	SPT7-like STAGA complex gamma subunit	-1.036	7.369
201845_s_at	RYBP	RING1 and YY1 binding protein	-1.202	5.979
201850_at	CAPG	capping actin protein, gelsolin like	2.307	5.996
201860_s_at	PLAT	plasminogen activator, tissue type	4.46	11.554
201874_at	MPZL1	myelin protein zero like 1	3.081	9.142
201887_at	IL13RA1	interleukin 13 receptor subunit alpha 1	2.379	10.808
201890_at	RRM2	ribonucleotide reductase regulatory subunit M2	3.362	6.413
201895_at	ARAF	A-Raf proto-oncogene, serine/threonine kinase	1.574	6.11
201909_at	RPS4Y1	ribosomal protein S4, Y-linked 1	-4.605	3.372
201913_s_at	COASY	Coenzyme A synthase	-1.013	5.757
201923_at	PRDX4	peroxiredoxin 4	2.375	12.23
201925_s_at	CD55	CD55 molecule (Cromer blood group)	-1.463	4.212
201928_at	PKP4	plakophilin 4	-1.242	6.237
201939_at	PLK2	polo like kinase 2	-2.074	1.981
201944_at	HEXB	hexosaminidase subunit beta	1.302	7.012
201952_at	ALCAM	activated leukocyte cell adhesion molecule	1.203	2.505
201954_at	ARPC1B	actin related protein 2/3 complex subunit 1B	1.838	6.394
201957_at	PPP1R12B	protein phosphatase 1 regulatory subunit 12B	-2.209	11.68
201960_s_at	MYCBP2	MYC binding protein 2, E3 ubiquitin protein ligase	-1.315	6.771
201962_s_at	RNF41	ring finger protein 41	-2.871	14.963
201980_s_at	RSU1	Ras suppressor protein 1	1.955	8.503
201998_at	ST6GAL1	ST6 beta-galactoside alpha-2,6-sialyltransferase 1	1.986	6.922
201999_s_at	DYNLT1	dynein light chain Tctex-type 1	1.565	8.499
202006_at	PTPN12	protein tyrosine phosphatase, non-receptor type 12	1.115	5.006
202007_at	NID1	nidogen 1	2.546	4.989
202012_s_at	EXT2	exostosin glycosyltransferase 2	1.143	3.738
202016_at	MEST	mesoderm specific transcript	2.265	6.765
202020_s_at	LANCL1	LanC like 1	-1.212	7.259
202023_at	EFNA1	ephrin A1	1.744	4.404
202037_s_at	SFRP1	secreted frizzled related protein 1	-2.586	2.403
202068_s_at	LDLR	low density lipoprotein receptor	1.386	1.738
202071_at	SDC4	syndecan 4	-2.174	4.272
202086_at	MX1	MX dynamin like GTPase 1	1.598	2.95
202088_at	SLC39A6	solute carrier family 39 member 6	1.14	7.95
202092_s_at	ARL2BP	ADP ribosylation factor like GTPase 2 binding protein	1.235	5.313
202095_s_at	BIRC5	baculoviral IAP repeat containing 5	1.695	6.185
202096_s_at	TSPO	translocator protein	2.774	9.231
202107_s_at	MCM2	minichromosome maintenance complex component 2	2.101	3.298
202108_at	PEPD	peptidase D	1.31	4.406
202111_at	SLC4A2	solute carrier family 4 member 2	1.743	2.21
202112_at	VWF	von Willebrand factor	1.083	2.989
202119_s_at	CPNE3	copine 3	1.884	9.935
202122_s_at	PLIN3	perilipin 3	2.256	6.459
202123_s_at	ABL1	ABL proto-oncogene 1, non-receptor tyrosine kinase	1.148	5.625
202133_at	WWTR1	WW domain containing transcription regulator 1	2.634	10.981
202135_s_at	ACTR1B	ARP1 actin-related protein 1 homolog B, centractin beta	-1.292	6.366
202145_at	LY6E	lymphocyte antigen 6 complex, locus E	-1.294	2.416
202149_at	NEDD9	neural precursor cell expressed, developmentally down-regulated 9	1.485	2.471
202161_at	PKN1	protein kinase N1	1.051	2.11
202171_at	VEZF1	vascular endothelial zinc finger 1	1.781	8.672
202177_at	GAS6	growth arrest specific 6	-1.469	5.718
202178_at	PRKCZ	protein kinase C zeta	-3.262	12.527
202180_s_at	MVP	major vault protein	3.003	8.138
202185_at	PLOD3	procollagen-lysine,2-oxoglutarate 5-dioxygenase 3	2.296	7.606
202187_s_at	PPP2R5A	protein phosphatase 2 regulatory subunit B'alpha	-1.207	4.423
202192_s_at	GAS7	growth arrest specific 7	-2.976	6.493
202193_at	LIMK2	LIM domain kinase 2	2.281	4.885
202194_at	TMED5	transmembrane p24 trafficking protein 5	1.289	9.728
202200_s_at	SRPK1	SRSF protein kinase 1	-1.428	6.952
202202_s_at	LAMA4	laminin subunit alpha 4	4.53	14.638
202211_at	ARFGAP3	ADP ribosylation factor GTPase activating protein 3	1.384	5.679
202218_s_at	FADS2	fatty acid desaturase 2	1.531	3.321
202223_at	STT3A	STT3A, catalytic subunit of the oligosaccharyltransferase complex	1.925	2.512
202237_at	LOC101928916///NNMT	uncharacterized LOC101928916///nicotinamide N-methyltransferase	2.624	2.995
202239_at	PARP4	poly(ADP-ribose) polymerase family member 4	1.511	5.648
202246_s_at	CDK4	cyclin dependent kinase 4	1.92	10.341
202252_at	RAB13	RAB13, member RAS oncogene family	2.153	8.26
202253_s_at	DNM2	dynamin 2	1.462	3.377
202254_at	SIPA1L1	signal induced proliferation associated 1 like 1	-1.005	2.406
202260_s_at	STXBP1	syntaxin binding protein 1	-2.581	14.744
202270_at	GBP1	guanylate binding protein 1	3.891	7.371
202282_at	HSD17B10	hydroxysteroid 17-beta dehydrogenase 10	1.608	8.917
202284_s_at	CDKN1A	cyclin dependent kinase inhibitor 1A	1.15	2.035
202291_s_at	MGP	matrix Gla protein	2.96	3.375
202294_at	STAG1	stromal antigen 1	1.03	4.01
202304_at	FNDC3A	fibronectin type III domain containing 3A	1.799	9.301
202307_s_at	TAP1	transporter 1, ATP binding cassette subfamily B member	1.833	10.594
202314_at	LRRD1///CYP51A1	leucine rich repeats and death domain containing 1///cytochrome P450 family 51 subfamily A member 1	1.104	4.679
202329_at	CSK	c-src tyrosine kinase	1.13	5.927
202336_s_at	PAM	peptidylglycine alpha-amidating monooxygenase	1.367	11.569
202345_s_at	FABP5	fatty acid binding protein 5	1.317	2.739
202350_s_at	LOC100506558///MATN2	uncharacterized LOC100506558///matrilin 2	3.624	10.065
202351_at	ITGAV	integrin subunit alpha V	1.715	9.123
202357_s_at	CFB	complement factor B	1.879	3.337
202365_at	UNC119B	unc-119 lipid binding chaperone B	1.088	5.853
202369_s_at	TRAM2	translocation associated membrane protein 2	4.094	9.665
202370_s_at	CBFB	core-binding factor beta subunit	1.504	7.216
202375_at	SEC24D	SEC24 homolog D, COPII coat complex component	1.722	2.535
202376_at	SERPINA3	serpin family A member 3	4.813	6.835
202377_at	LEPROT	leptin receptor overlapping transcript	1.539	7.919
202381_at	ADAM9	ADAM metallopeptidase domain 9	2.256	8.44
202388_at	RGS2	regulator of G-protein signaling 2	-1.178	2.47
202390_s_at	HTT	huntingtin	-1.6	8.661
202391_at	BASP1	brain abundant membrane attached signal protein 1	-1.62	8.15
202392_s_at	MIR7109///PISD	microRNA 7109///phosphatidylserine decarboxylase	-1.157	3.197
202395_at	LOC101930324///NSF	uncharacterized LOC101930324///N-ethylmaleimide sensitive factor, vesicle fusing ATPase	-2.274	14.401
202403_s_at	COL1A2	collagen type I alpha 2 chain	2.232	3.587
202409_at	INS-IGF2///IGF2	INS-IGF2 readthrough///insulin like growth factor 2	3.187	2.165
202415_s_at	HSPBP1	HSPA (Hsp70) binding protein 1	-1.119	3.313
202418_at	YIF1A	Yip1 interacting factor homolog A, membrane trafficking protein	1.261	8.341
202421_at	IGSF3	immunoglobulin superfamily member 3	-1.285	3.003
202429_s_at	PPP3CA	protein phosphatase 3 catalytic subunit alpha	-1.743	4.504
202431_s_at	MYC	v-myc avian myelocytomatosis viral oncogene homolog	1.888	4.192
202432_at	PPP3CB	protein phosphatase 3 catalytic subunit beta	-2.099	7.951
202440_s_at	ST5	suppression of tumorigenicity 5	1.433	6.096
202441_at	ERLIN1	ER lipid raft associated 1	1.027	4.727
202446_s_at	PLSCR1	phospholipid scramblase 1	2.573	7.977
202450_s_at	CTSK	cathepsin K	3.447	7.288
202452_at	ZER1	zyg-11 related cell cycle regulator	-1.585	6.116
202455_at	HDAC5	histone deacetylase 5	-1.221	6.004
202458_at	PRSS23	protease, serine 23	3.969	9.551
202465_at	PCOLCE	procollagen C-endopeptidase enhancer	2.612	3.324
202466_at	PAPD7	poly(A) RNA polymerase D7, non-canonical	-1.067	3.836
202478_at	TRIB2	tribbles pseudokinase 2	1.647	5.35
202481_at	DHRS3	dehydrogenase/reductase 3	1.613	3.726
202484_s_at	MBD2	methyl-CpG binding domain protein 2	1.479	8.533
202499_s_at	SLC2A3	solute carrier family 2 member 3	-2.14	5.833
202500_at	DNAJB2	DnaJ heat shock protein family (Hsp40) member B2	-1.387	5.321
202503_s_at	KIAA0101	KIAA0101	3.077	2.562
202506_at	SSFA2	sperm specific antigen 2	1.42	5.393
202508_s_at	SNAP25	synaptosome associated protein 25	-2.849	9.567
202522_at	PITPNB	phosphatidylinositol transfer protein beta	-1.021	7.322
202527_s_at	SMAD4	SMAD family member 4	1.126	2.119
202531_at	IRF1	interferon regulatory factor 1	2.256	5.41
202541_at	AIMP1	aminoacyl tRNA synthetase complex interacting multifunctional protein 1	1.075	6.004
202546_at	VAMP8	vesicle associated membrane protein 8	2.17	5.862
202565_s_at	SVIL	supervillin	3.684	9.482
202577_s_at	DDX19A	DEAD-box helicase 19A	1.026	7.33
202589_at	TYMS	thymidylate synthetase	2.552	4.684
202590_s_at	PDK2	pyruvate dehydrogenase kinase 2	-1.01	3.297
202605_at	GUSB	glucuronidase beta	1.044	3.454
202609_at	EPS8	epidermal growth factor receptor pathway substrate 8	1.423	8.714
202616_s_at	MECP2	methyl-CpG binding protein 2	-1.15	5.521
202620_s_at	PLOD2	procollagen-lysine,2-oxoglutarate 5-dioxygenase 2	1.857	7.305
202625_at	LYN	LYN proto-oncogene, Src family tyrosine kinase	1.047	3.346
202627_s_at	SERPINE1	serpin family E member 1	3.444	3.579
202637_s_at	ICAM1	intercellular adhesion molecule 1	4.023	8.706
202644_s_at	TNFAIP3	TNF alpha induced protein 3	3.894	9.354
202652_at	APBB1	amyloid beta precursor protein binding family B member 1	-1.497	7.957
202660_at	ITPR2	inositol 1,4,5-trisphosphate receptor type 2	2.195	5.603
202664_at	WIPF1	WAS/WASL interacting protein family member 1	2.623	6.172
202666_s_at	ACTL6A	actin like 6A	1.891	5.292
202670_at	MAP2K1	mitogen-activated protein kinase kinase 1	-1.02	3.807
202686_s_at	AXL	AXL receptor tyrosine kinase	1.115	4.695
202688_at	TNFSF10	tumor necrosis factor superfamily member 10	4.045	7.888
202693_s_at	STK17A	serine/threonine kinase 17a	2.355	7.449
202700_s_at	TMEM63A	transmembrane protein 63A	-1.092	3.002
202705_at	CCNB2	cyclin B2	1.666	4.358
202706_s_at	UMPS	uridine monophosphate synthetase	1.258	8.312
202708_s_at	HIST2H2BE	histone cluster 2, H2be	-2.244	7.626
202709_at	FMOD	fibromodulin	1.901	3.15
202712_s_at	CKMT1A///CKMT1B	creatine kinase, mitochondrial 1A///creatine kinase, mitochondrial 1B	-5.157	10.4
202718_at	IGFBP2	insulin like growth factor binding protein 2	1.718	2.154
202733_at	LOC101927705///P4HA2	uncharacterized LOC101927705///prolyl 4-hydroxylase subunit alpha 2	-1.228	2.312
202734_at	TRIP10	thyroid hormone receptor interactor 10	2.394	5.102
202740_at	ABHD14A-ACY1///ACY1	ABHD14A-ACY1 readthrough///aminoacylase 1	1.044	3.973
202746_at	ITM2A	integral membrane protein 2A	1.524	3.738
202748_at	GBP2	guanylate binding protein 2	4.367	11.3
202754_at	R3HDM1	R3H domain containing 1	-2.062	4.48
202761_s_at	SYNE2	spectrin repeat containing nuclear envelope protein 2	1.557	2.491
202762_at	ROCK2	Rho associated coiled-coil containing protein kinase 2	-1.423	9.131
202766_s_at	FBN1	fibrillin 1	2.025	3.927
202767_at	ACP2	acid phosphatase 2, lysosomal	1.015	3.138
202771_at	PIEZO1	piezo type mechanosensitive ion channel component 1	2.283	5.801
202780_at	OXCT1	3-oxoacid CoA-transferase 1	-1.401	7.851
202788_at	MAPKAPK3	mitogen-activated protein kinase-activated protein kinase 3	1.11	4.169
202793_at	LPCAT3	lysophosphatidylcholine acyltransferase 3	1.269	3.511
202796_at	SYNPO	synaptopodin	1.72	3.01
202800_at	SLC1A3	solute carrier family 1 member 3	-1.507	8.511
202803_s_at	ITGB2	integrin subunit beta 2	2.694	7.893
202812_at	GAA	glucosidase alpha, acid	2.164	5.883
202817_s_at	SS18	SS18, nBAF chromatin remodeling complex subunit	1.864	4.841
202820_at	AHR	aryl hydrocarbon receptor	3.55	15.989
202853_s_at	RYK	receptor-like tyrosine kinase	1.355	8.941
202854_at	HPRT1	hypoxanthine phosphoribosyltransferase 1	-2.482	10.385
202859_x_at	CXCL8	C-X-C motif chemokine ligand 8	2.891	3.67
202861_at	MIR6883///PER1	microRNA 6883///period circadian clock 1	-1.378	2.726
202864_s_at	SP100	SP100 nuclear antigen	2.997	7.925
202871_at	TRAF4	TNF receptor associated factor 4	2.622	8.29
202874_s_at	ATP6V1C1	ATPase H+ transporting V1 subunit C1	-1.017	2.681
202878_s_at	CD93	CD93 molecule	3.706	5.742
202890_at	MAP7	microtubule associated protein 7	-1.615	3.755
202897_at	SIRPA	signal regulatory protein alpha	-1.074	5.506
202898_at	SDC3	syndecan 3	1.807	4.422
202901_x_at	CTSS	cathepsin S	2.474	3.254
202908_at	WFS1	wolframin ER transmembrane glycoprotein	-1.799	7.212
202910_s_at	ADGRE5	adhesion G protein-coupled receptor E5	3.203	10.639
202920_at	ANK2	ankyrin 2, neuronal	-1.415	10.585
202927_at	PIN1	peptidylprolyl cis/trans isomerase, NIMA-interacting 1	-1.81	8.969
202933_s_at	YES1	YES proto-oncogene 1, Src family tyrosine kinase	1.46	5.845
202934_at	HK2	hexokinase 2	1.778	2.579
202945_at	FPGS	folylpolyglutamate synthase	1.369	5.972
202946_s_at	BTBD3	BTB domain containing 3	-1.641	7.672
202947_s_at	GYPC	glycophorin C (Gerbich blood group)	3.33	9.335
202948_at	IL1R1	interleukin 1 receptor type 1	1.437	1.868
202950_at	CRYZ	crystallin zeta	1.184	3.417
202953_at	C1QB	complement C1q B chain	1.528	4.607
202954_at	UBE2C	ubiquitin conjugating enzyme E2 C	1.954	5.438
202957_at	HCLS1	hematopoietic cell-specific Lyn substrate 1	2.479	8.497
202962_at	KIF13B	kinesin family member 13B	1.791	3.757
202990_at	PYGL	phosphorylase, glycogen, liver	4.489	12.005
202992_at	C7	complement component 7	2.131	2.366
202996_at	POLD4	DNA polymerase delta 4, accessory subunit	1.193	3.511
202998_s_at	LOXL2	lysyl oxidase like 2	3.867	5.833
203000_at	STMN2	stathmin 2	-7.039	10.857
203005_at	LTBR	lymphotoxin beta receptor	1.444	3.905
203006_at	INPP5A	inositol polyphosphate-5-phosphatase A	-1.762	6.12
203010_at	STAT5A	signal transducer and activator of transcription 5A	1.405	4.418
203017_s_at	SSX2IP	SSX family member 2 interacting protein	-3.225	5.211
203021_at	SLPI	secretory leukocyte peptidase inhibitor	1.851	4.049
203022_at	RNASEH2A	ribonuclease H2 subunit A	1.401	3.28
203024_s_at	C5orf15	chromosome 5 open reading frame 15	1.641	12.367
203028_s_at	CYBA	cytochrome b-245 alpha chain	2.307	7.646
203029_s_at	PTPRN2	protein tyrosine phosphatase, receptor type N2	-1.44	4.099
203031_s_at	UROS	uroporphyrinogen III synthase	-1.289	5.688
203037_s_at	MTSS1	metastasis suppressor 1	1.127	3.746
203040_s_at	HMBS	hydroxymethylbilane synthase	1.702	7.182
203052_at	C2	complement component 2	1.222	3.476
203060_s_at	PAPSS2	3'-phosphoadenosine 5'-phosphosulfate synthase 2	1.714	4.736
203062_s_at	MDC1	mediator of DNA damage checkpoint 1	1.011	4.736
203068_at	KLHL21	kelch like family member 21	-1.221	4.243
203069_at	SV2A	synaptic vesicle glycoprotein 2A	-1.071	6.929
203083_at	THBS2	thrombospondin 2	2.361	5.119
203085_s_at	TGFB1	transforming growth factor beta 1	3.819	5.96
203088_at	FBLN5	fibulin 5	2.81	4.978
203097_s_at	RAPGEF2	Rap guanine nucleotide exchange factor 2	-1.003	3.602
203102_s_at	MGAT2	mannosyl (alpha-1,6-)-glycoprotein beta-1,2-N-acetylglucosaminyltransferase	1.308	7.31
203104_at	CSF1R	colony stimulating factor 1 receptor	2.363	4.591
203110_at	PTK2B	protein tyrosine kinase 2 beta	-2.614	4.762
203130_s_at	KIF5C	kinesin family member 5C	-1.689	11.285
203131_at	PDGFRA	platelet derived growth factor receptor alpha	4.437	9.312
203132_at	RB1	RB transcriptional corepressor 1	1.318	6.475
203138_at	HAT1	histone acetyltransferase 1	1.129	8.116
203139_at	DAPK1	death associated protein kinase 1	-3.252	6.594
203142_s_at	AP3B1	adaptor related protein complex 3 beta 1 subunit	1.307	5.581
203143_s_at	KIAA0040	KIAA0040	3.714	6.304
203145_at	SPAG5	sperm associated antigen 5	-1.323	3.367
203146_s_at	GABBR1	gamma-aminobutyric acid type B receptor subunit 1	-1.39	5.03
203148_s_at	TRIM14	tripartite motif containing 14	4.602	11.016
203151_at	MAP1A	microtubule associated protein 1A	-1.901	7.901
203162_s_at	KATNB1	katanin regulatory subunit B1	-1.493	4.954
203175_at	RHOG	ras homolog family member G	1.46	3.905
203178_at	GATM	glycine amidinotransferase	1.599	3.803
203180_at	ALDH1A3	aldehyde dehydrogenase 1 family member A3	5.856	7.27
203182_s_at	SRPK2	SRSF protein kinase 2	-1.288	7.976
203184_at	FBN2	fibrillin 2	2.928	6.8
203185_at	RASSF2	Ras association domain family member 2	1.751	3.294
203186_s_at	S100A4	S100 calcium binding protein A4	3.234	7.346
203187_at	DOCK1	dedicator of cytokinesis 1	2.089	5.182
203196_at	ABCC4	ATP binding cassette subfamily C member 4	3.085	11.146
203203_s_at	KRR1	KRR1, small subunit processome component homolog	1.137	3.699
203208_s_at	MTFR1	mitochondrial fission regulator 1	1.018	3.408
203213_at	CDK1	cyclin dependent kinase 1	2.787	5.347
203218_at	MAPK9	mitogen-activated protein kinase 9	-1.501	8.964
203236_s_at	LGALS9	galectin 9	1.339	2.637
203238_s_at	NOTCH3	notch 3	1.117	1.701
203240_at	FCGBP	Fc fragment of IgG binding protein	4.526	5.846
203254_s_at	TLN1	talin 1	2.828	4.329
203256_at	CDH3	cadherin 3	2.7	5.16
203264_s_at	ARHGEF9	Cdc42 guanine nucleotide exchange factor 9	-1.164	3.991
203266_s_at	MAP2K4	mitogen-activated protein kinase kinase 4	-1.938	10.973
203271_s_at	UNC119	unc-119 lipid binding chaperone	-1.157	4.553
203273_s_at	TUSC2	tumor suppressor candidate 2	-1.477	10.269
203275_at	IRF2	interferon regulatory factor 2	1.177	4.084
203276_at	LMNB1	lamin B1	1.925	4.209
203281_s_at	MIR5193///UBA7	microRNA 5193///ubiquitin like modifier activating enzyme 7	2.129	5.713
203282_at	GBE1	glucan (1,4-alpha-), branching enzyme 1	1.133	3.298
203290_at	HLA-DQA1	major histocompatibility complex, class II, DQ alpha 1	3.73	6.653
203304_at	BAMBI	BMP and activin membrane bound inhibitor	3.842	7.406
203313_s_at	TGIF1	TGFB induced factor homeobox 1	2.375	5.566
203320_at	SH2B3	SH2B adaptor protein 3	1.369	3.751
203324_s_at	CAV2	caveolin 2	3.964	8.602
203325_s_at	COL5A1	collagen type V alpha 1 chain	3.433	6.913
203332_s_at	INPP5D	inositol polyphosphate-5-phosphatase D	1.207	2.898
203340_s_at	SLC25A12	solute carrier family 25 member 12	-1.088	3.036
203343_at	UGDH	UDP-glucose 6-dehydrogenase	3.138	8.341
203344_s_at	RBBP8	RB binding protein 8, endonuclease	1.382	7.282
203349_s_at	ETV5	ETS variant 5	1.533	4.261
203358_s_at	EZH2	enhancer of zeste 2 polycomb repressive complex 2 subunit	2.481	5.303
203359_s_at	GJA9-MYCBP///MYCBP	GJA9-MYCBP readthrough///MYC binding protein	2.384	6.594
203360_s_at	GJA9-MYCBP///GJA9///MYCBP	GJA9-MYCBP readthrough///gap junction protein alpha 9///MYC binding protein	1.207	3.753
203365_s_at	MMP15	matrix metallopeptidase 15	1.499	1.889
203367_at	DUSP14	dual specificity phosphatase 14	-1.459	4.571
203368_at	CRELD1	cysteine rich with EGF like domains 1	-1.558	6.618
203373_at	SOCS2	suppressor of cytokine signaling 2	2.316	6.458
203381_s_at	APOE	apolipoprotein E	1.391	1.761
203385_at	DGKA	diacylglycerol kinase alpha	1.095	2.15
203389_at	KIF3C	kinesin family member 3C	-1.686	5.952
203395_s_at	HES1	hes family bHLH transcription factor 1	1.314	4.012
203397_s_at	GALNT3	polypeptide N-acetylgalactosaminyltransferase 3	1.981	4.144
203402_at	KCNAB2	potassium voltage-gated channel subfamily A regulatory beta subunit 2	-4.627	13.302
203407_at	PPL	periplakin	-2.626	2.875
203409_at	DDB2	damage specific DNA binding protein 2	1.082	3.555
203410_at	AP3M2	adaptor related protein complex 3 mu 2 subunit	-2.1	12.685
203411_s_at	LMNA	lamin A/C	1.348	4.235
203413_at	NELL2	neural EGFL like 2	-1.657	4.162
203416_at	CD53	CD53 molecule	2.409	7.757
203417_at	MFAP2	microfibrillar associated protein 2	2.385	3.358
203421_at	TP53I11	tumor protein p53 inducible protein 11	-1.678	6.28
203423_at	RBP1	retinol binding protein 1	3.461	8.586
203429_s_at	SUCO	SUN domain containing ossification factor	1.057	4.885
203430_at	HEBP2	heme binding protein 2	1.03	3.766
203438_at	STC2	stanniocalcin 2	1.293	1.67
203442_x_at	EML3	echinoderm microtubule associated protein like 3	1.919	4.805
203446_s_at	OCRL	OCRL, inositol polyphosphate-5-phosphatase	-1.889	9.736
203456_at	PRAF2	PRA1 domain family member 2	1.032	2.505
203458_at	SPR	sepiapterin reductase (7,8-dihydrobiopterin:NADP+ oxidoreductase)	-1.201	2.239
203464_s_at	EPN2-IT1///EPN2	EPN2 intronic transcript 1///epsin 2	1.906	5.803
203469_s_at	CDK10	cyclin dependent kinase 10	-1	4.7
203471_s_at	PLEK	pleckstrin	1.975	6.05
203473_at	SLCO2B1	solute carrier organic anion transporter family member 2B1	1.016	3.396
203474_at	IQGAP2	IQ motif containing GTPase activating protein 2	2.35	5.086
203477_at	COL15A1	collagen type XV alpha 1 chain	4.109	5.795
203485_at	RTN1	reticulon 1	-1.656	5.71
203497_at	MED1	mediator complex subunit 1	1.1	5.336
203498_at	RCAN2	regulator of calcineurin 2	-3.035	8.052
203501_at	CPQ	carboxypeptidase Q	1.684	4.977
203505_at	ABCA1	ATP binding cassette subfamily A member 1	1.922	6.516
203516_at	SNTA1	syntrophin alpha 1	-2.976	7.09
203517_at	MTX2	metaxin 2	-1.195	6.353
203523_at	LSP1	lymphocyte-specific protein 1	1.663	2.382
203525_s_at	APC	APC, WNT signaling pathway regulator	-1.141	3.1
203545_at	ALG8	ALG8, alpha-1,3-glucosyltransferase	1.023	7.439
203547_at	CD4	CD4 molecule	1.759	2.119
203549_s_at	LPL	lipoprotein lipase	2.794	5.312
203552_at	MAP4K5	mitogen-activated protein kinase kinase kinase kinase 5	2.068	6.709
203556_at	ZHX2	zinc fingers and homeoboxes 2	1.416	5.546
203561_at	FCGR2A	Fc fragment of IgG receptor IIa	1.374	3.596
203563_at	AFAP1	actin filament associated protein 1	1.462	4.202
203570_at	LOXL1	lysyl oxidase like 1	4.174	8.392
203571_s_at	ADIRF	adipogenesis regulatory factor	-1.667	2.062
203572_s_at	TAF6	TATA-box binding protein associated factor 6	-1.247	3.665
203586_s_at	ARL4D	ADP ribosylation factor like GTPase 4D	-1.211	3.17
203603_s_at	ZEB2	zinc finger E-box binding homeobox 2	1.525	2.445
203604_at	ZNF516	zinc finger protein 516	1.442	5.158
203615_x_at	SULT1A1	sulfotransferase family 1A member 1	-1.585	6.737
203616_at	POLB	DNA polymerase beta	-1.198	3.48
203617_x_at	ELK1	ELK1, ETS transcription factor	-1.081	4.231
203620_s_at	FCHSD2	FCH and double SH3 domains 2	1.042	5.104
203638_s_at	FGFR2	fibroblast growth factor receptor 2	-4.168	7.802
203640_at	MBNL2	muscleblind like splicing regulator 2	-1.166	8.931
203645_s_at	CD163	CD163 molecule	2.078	2.44
203649_s_at	PLA2G2A	phospholipase A2 group IIA	7.145	10.982
203660_s_at	PCNT	pericentrin	-1.14	4.351
203661_s_at	TMOD1	tropomodulin 1	1.799	2.175
203665_at	HMOX1	heme oxygenase 1	2.351	4.316
203671_at	TPMT	thiopurine S-methyltransferase	-1.491	7.849
203675_at	NUCB2	nucleobindin 2	1.049	5.483
203680_at	PRKAR2B	protein kinase cAMP-dependent type II regulatory subunit beta	-2.073	4.642
203683_s_at	VEGFB	vascular endothelial growth factor B	1.041	2.085
203688_at	PKD2	polycystin 2, transient receptor potential cation channel	1.235	4.6
203695_s_at	DFNA5	DFNA5, deafness associated tumor suppressor	1.15	4.983
203697_at	FRZB	frizzled-related protein	1.894	2.924
203700_s_at	DIO2	deiodinase, iodothyronine, type II	-3.275	3.544
203702_s_at	TTLL4	tubulin tyrosine ligase like 4	1.486	2.878
203704_s_at	RREB1	ras responsive element binding protein 1	1.058	2.454
203708_at	PDE4B	phosphodiesterase 4B	1.803	6.985
203710_at	ITPR1	inositol 1,4,5-trisphosphate receptor type 1	-3.089	6.72
203712_at	PUM3	pumilio RNA binding family member 3	1.179	2.966
203720_s_at	ERCC1	ERCC excision repair 1, endonuclease non-catalytic subunit	1.052	5.429
203725_at	GADD45A	growth arrest and DNA damage inducible alpha	1.985	7.697
203729_at	EMP3	epithelial membrane protein 3	4.309	7.628
203733_at	DEXI	Dexi homolog	-1.005	5.265
203735_x_at	PPFIBP1	PPFIA binding protein 1	1.247	2.098
203739_at	ZNF217	zinc finger protein 217	2.903	8.385
203741_s_at	ADCY7	adenylate cyclase 7	1.389	2.904
203744_at	HMGB3	high mobility group box 3	-1.748	5.458
203745_at	HCCS	holocytochrome c synthase	-1.008	4.579
203749_s_at	RARA	retinoic acid receptor alpha	2.301	6.969
203755_at	BUB1B	BUB1 mitotic checkpoint serine/threonine kinase B	1.872	2.45
203758_at	CTSO	cathepsin O	3.143	7.775
203761_at	SLA	Src-like-adaptor	1.375	3.057
203764_at	DLGAP5	DLG associated protein 5	1.271	5.745
203766_s_at	LMOD1	leiomodin 1	3.426	4.9
203775_at	SLC25A13	solute carrier family 25 member 13	1.782	5.816
203782_s_at	POLRMT	RNA polymerase mitochondrial	-1.019	3.611
203786_s_at	TPD52L1	tumor protein D52-like 1	-3.085	5.468
203790_s_at	RIDA	reactive intermediate imine deaminase A homolog	-1.504	4.932
203794_at	CDC42BPA	CDC42 binding protein kinase alpha	-1.08	6.731
203795_s_at	BCL7A	BCL tumor suppressor 7A	-2.166	6.88
203797_at	VSNL1	visinin like 1	-8.8	15.397
203799_at	LY75-CD302///CD302///LY75	LY75-CD302 readthrough///CD302 molecule///lymphocyte antigen 75	1.736	7.63
203812_at	SLIT3	slit guidance ligand 3	-2.427	9.703
203817_at	GUCY1B3	guanylate cyclase 1 soluble subunit beta	-2.561	10.233
203820_s_at	IGF2BP3	insulin like growth factor 2 mRNA binding protein 3	2.954	4.22
203821_at	HBEGF	heparin binding EGF like growth factor	1.177	2.532
203826_s_at	PITPNM1	phosphatidylinositol transfer protein membrane associated 1	-3.067	8.523
203831_at	R3HDM2	R3H domain containing 2	-1.186	5.739
203842_s_at	MAPRE3	microtubule associated protein RP/EB family member 3	-1.764	9.936
203845_at	KAT2B	lysine acetyltransferase 2B	1.471	4.706
203854_at	CFI	complement factor I	8.555	15.665
203855_at	WDR47	WD repeat domain 47	-1.962	11.12
203856_at	VRK1	vaccinia related kinase 1	-1.196	3.583
203857_s_at	MIR7110///PDIA5	microRNA 7110///protein disulfide isomerase family A member 5	2.413	4.199
203859_s_at	PALM	paralemmin	-1.376	3.753
203862_s_at	ACTN2	actinin alpha 2	-1.891	3.546
203865_s_at	ADARB1	adenosine deaminase, RNA specific B1	-2.237	10.552
203868_s_at	VCAM1	vascular cell adhesion molecule 1	1.689	1.734
203882_at	IRF9	interferon regulatory factor 9	1.962	7.686
203883_s_at	RAB11FIP2	RAB11 family interacting protein 2	-1.22	5.482
203894_at	TUBG2	tubulin gamma 2	-1.933	7.167
203895_at	PLCB4	phospholipase C beta 4	-4.209	8.096
203903_s_at	HEPH	hephaestin	-1.25	1.818
203904_x_at	CD82	CD82 molecule	1.944	4.183
203906_at	IQSEC1	IQ motif and Sec7 domain 1	-1.559	5.898
203909_at	SLC9A6	solute carrier family 9 member A6	-1.287	8.621
203911_at	RAP1GAP	RAP1 GTPase activating protein	-1.649	3.457
203912_s_at	DNASE1L1	deoxyribonuclease 1 like 1	-1.181	2.732
203923_s_at	CYBB	cytochrome b-245 beta chain	2.872	5.418
203929_s_at	MAPT	microtubule associated protein tau	-1.889	8.159
203932_at	HLA-DMB	major histocompatibility complex, class II, DM beta	2.376	5.823
203934_at	KDR	kinase insert domain receptor	1.57	2.981
203935_at	ACVR1	activin A receptor type 1	1.253	3.306
203936_s_at	MMP9	matrix metallopeptidase 9	2.107	2.684
203939_at	NT5E	5'-nucleotidase ecto	3.298	6.677
203940_s_at	VASH1	vasohibin 1	1.282	7.289
203941_at	INTS9	integrator complex subunit 9	1.373	5.513
203955_at	PPP1R26	protein phosphatase 1 regulatory subunit 26	-1.706	4.507
203964_at	NMI	N-myc and STAT interactor	3.318	12.601
203965_at	USP20	ubiquitin specific peptidase 20	-1.992	6.211
203973_s_at	CEBPD	CCAAT/enhancer binding protein delta	1.373	4.129
203974_at	PUDP	pseudouridine 5'-phosphatase	1.577	6.678
203978_at	NUBP1	nucleotide binding protein 1	1.096	3.993
203979_at	CYP27A1	cytochrome P450 family 27 subfamily A member 1	1.15	2.412
203987_at	FZD6	frizzled class receptor 6	4.468	9.306
203989_x_at	F2R	coagulation factor II thrombin receptor	4.084	9.539
203997_at	PTPN3	protein tyrosine phosphatase, non-receptor type 3	-3.073	4.564
203999_at	SYT1	synaptotagmin 1	-7.988	13.105
204000_at	GNB5	G protein subunit beta 5	-2.719	9.511
204003_s_at	NUPL2	nucleoporin like 2	1.345	4.324
204006_s_at	FCGR3B///FCGR3A	Fc fragment of IgG receptor IIIb///Fc fragment of IgG receptor IIIa	3.076	4.134
204007_at	FCGR3B	Fc fragment of IgG receptor IIIb	1.755	5.153
204015_s_at	DUSP4	dual specificity phosphatase 4	1.349	2.116
204017_at	KDELR3	KDEL endoplasmic reticulum protein retention receptor 3	1.415	1.9
204022_at	WWP2	WW domain containing E3 ubiquitin protein ligase 2	1.666	7.708
204032_at	BCAR3	breast cancer anti-estrogen resistance 3	-1.458	4.281
204033_at	TRIP13	thyroid hormone receptor interactor 13	-1.667	2.066
204039_at	CEBPA	CCAAT/enhancer binding protein alpha	1.354	3.017
204041_at	MAOB	monoamine oxidase B	1.345	4.348
204042_at	WASF3	WAS protein family member 3	-1.607	7.513
204043_at	TCN2	transcobalamin 2	1.69	3.436
204051_s_at	SFRP4	secreted frizzled related protein 4	4.524	6.806
204057_at	IRF8	interferon regulatory factor 8	1.574	4.156
204060_s_at	PRKY///PRKX	protein kinase, Y-linked, pseudogene///protein kinase, X-linked	1.073	3.256
204070_at	RARRES3	retinoic acid receptor responder 3	2.505	4.608
204076_at	ENTPD4	ectonucleoside triphosphate diphosphohydrolase 4	-1.652	10.782
204078_at	P3H4	prolyl 3-hydroxylase family member 4 (non-enzymatic)	1.817	6.725
204079_at	TPST2	tyrosylprotein sulfotransferase 2	-1.128	2.235
204081_at	NRGN	neurogranin	-6.308	4.098
204082_at	PBX3	PBX homeobox 3	2.774	4.808
204103_at	CCL4	C-C motif chemokine ligand 4	5.173	7.079
204106_at	TESK1	testis-specific kinase 1	-1.099	5.802
204112_s_at	HNMT	histamine N-methyltransferase	2.338	6.607
204114_at	NID2	nidogen 2	3.934	7.424
204118_at	CD48	CD48 molecule	1.607	3.261
204121_at	GADD45G	growth arrest and DNA damage inducible gamma	-1.908	3.58
204122_at	TYROBP	TYRO protein tyrosine kinase binding protein	2.139	7.526
204134_at	PDE2A	phosphodiesterase 2A	-3.171	3.89
204135_at	FILIP1L	filamin A interacting protein 1 like	1.731	3.183
204140_at	TPST1	tyrosylprotein sulfotransferase 1	1.756	5.043
204141_at	TUBB2A	tubulin beta 2A class IIa	-1.27	9.303
204146_at	RAD51AP1	RAD51 associated protein 1	1.354	4.313
204149_s_at	GSTM4	glutathione S-transferase mu 4	1.357	2.591
204150_at	STAB1	stabilin 1	1.366	2.347
204153_s_at	MFNG	MFNG O-fucosylpeptide 3-beta-N-acetylglucosaminyltransferase	2.462	7.69
204158_s_at	TCIRG1	T-cell immune regulator 1, ATPase H+ transporting V0 subunit a3	1.817	4.102
204159_at	CDKN2C	cyclin dependent kinase inhibitor 2C	3.214	7.315
204162_at	NDC80	NDC80, kinetochore complex component	1.792	5.7
204163_at	EMILIN1	elastin microfibril interfacer 1	2.383	7.532
204164_at	SIPA1	signal-induced proliferation-associated 1	1.272	5.293
204165_at	WASF1	WAS protein family member 1	-1.182	2.169
204166_at	SBNO2	strawberry notch homolog 2	2.028	3.695
204168_at	MGST2	microsomal glutathione S-transferase 2	1.023	2.307
204169_at	IMPDH1	inosine monophosphate dehydrogenase 1	-1.368	6.562
204170_s_at	CKS2	CDC28 protein kinase regulatory subunit 2	-1.406	1.697
204174_at	ALOX5AP	arachidonate 5-lipoxygenase activating protein	2.977	9.371
204185_x_at	PPID	peptidylprolyl isomerase D	-1.07	4.287
204192_at	CD37	CD37 molecule	2.765	7.323
204194_at	BACH1	BTB domain and CNC homolog 1	1.938	10.075
204199_at	RALGPS1	Ral GEF with PH domain and SH3 binding motif 1	-2.132	10.314
204205_at	APOBEC3G	apolipoprotein B mRNA editing enzyme catalytic subunit 3G	2.476	6.868
204212_at	ACOT8	acyl-CoA thioesterase 8	-1.641	5.582
204214_s_at	RAB32	RAB32, member RAS oncogene family	1.406	4.764
204218_at	ANAPC15	anaphase promoting complex subunit 15	-1.26	2.427
204220_at	GMFG	glia maturation factor gamma	1.717	4.352
204230_s_at	SLC17A7	solute carrier family 17 member 7	-5.656	5.784
204231_s_at	FAAH	fatty acid amide hydrolase	-1.952	4.705
204232_at	FCER1G	Fc fragment of IgE receptor Ig	2.105	4.809
204234_s_at	ZNF195	zinc finger protein 195	1.116	3.97
204236_at	FLI1	Fli-1 proto-oncogene, ETS transcription factor	2.056	5.008
204237_at	GULP1	GULP, engulfment adaptor PTB domain containing 1	-3.85	6.631
204239_s_at	NNAT	neuronatin	-2.507	5.586
204247_s_at	CDK5	cyclin dependent kinase 5	-2.687	8.912
204249_s_at	LMO2	LIM domain only 2	2.126	8.29
204252_at	CDK2	cyclin dependent kinase 2	2.92	6.658
204260_at	CHGB	chromogranin B	-3.065	6.047
204265_s_at	GPSM3	G-protein signaling modulator 3	1.27	2.091
204279_at	PSMB9	proteasome subunit beta 9	4.617	9.471
204283_at	FARS2	phenylalanyl-tRNA synthetase 2, mitochondrial	1.026	3.605
204284_at	PPP1R3C	protein phosphatase 1 regulatory subunit 3C	-1.807	2.709
204285_s_at	PMAIP1	phorbol-12-myristate-13-acetate-induced protein 1	1.547	2.148
204287_at	SYNGR1	synaptogyrin 1	-2.446	8.731
204300_at	GATB	glutamyl-tRNA amidotransferase subunit B	-2.217	6.045
204301_at	KBTBD11	kelch repeat and BTB domain containing 11	-2.111	5.855
204303_s_at	CTIF	cap binding complex dependent translation initiation factor	-2.028	8.479
204306_s_at	CD151	CD151 molecule (Raph blood group)	1.656	4.626
204308_s_at	TECPR2	tectonin beta-propeller repeat containing 2	-1.064	3.438
204319_s_at	RGS10	regulator of G-protein signaling 10	1.883	9.391
204333_s_at	AGA	aspartylglucosaminidase	1.192	3.066
204336_s_at	RGS19	regulator of G-protein signaling 19	1.446	4.743
204337_at	RGS4	regulator of G-protein signaling 4	-4.033	2.031
204342_at	SLC25A24	solute carrier family 25 member 24	1.321	5.404
204345_at	COL16A1	collagen type XVI alpha 1 chain	1.504	3.427
204357_s_at	LIMK1	LIM domain kinase 1	-1.192	1.836
204360_s_at	NAGLU	N-acetyl-alpha-glucosaminidase	1.952	5.55
204363_at	F3	coagulation factor III, tissue factor	1.042	3.595
204368_at	SLCO2A1	solute carrier organic anion transporter family member 2A1	1.39	2.534
204375_at	CLSTN3	calsyntenin 3	-2.852	6.275
204378_at	BCAS1	breast carcinoma amplified sequence 1	2.053	2.858
204379_s_at	FGFR3	fibroblast growth factor receptor 3	-2.017	3.275
204381_at	LRP3	LDL receptor related protein 3	-1.338	4.393
204392_at	CAMK1	calcium/calmodulin dependent protein kinase I	-1.229	2.497
204398_s_at	EML2	echinoderm microtubule associated protein like 2	-1.185	3.288
204400_at	EFS	embryonal Fyn-associated substrate	2.576	3.155
204407_at	TTF2	transcription termination factor 2	1.154	2.455
204409_s_at	EIF1AY	eukaryotic translation initiation factor 1A, Y-linked	-2.531	2.438
204411_at	KIF21B	kinesin family member 21B	-2.15	2.581
204416_x_at	APOC1	apolipoprotein C1	1.723	3.409
204419_x_at	HBG2///HBG1	hemoglobin subunit gamma 2///hemoglobin subunit gamma 1	-5.316	5.339
204422_s_at	FGF2	fibroblast growth factor 2	1.026	2.154
204424_s_at	LMO3	LIM domain only 3	-3.585	3.521
204428_s_at	LCAT	lecithin-cholesterol acyltransferase	2.757	3.963
204430_s_at	SLC2A5	solute carrier family 2 member 5	1.665	4.88
204434_at	SPATA2	spermatogenesis associated 2	-2.303	9.965
204435_at	NUP58	nucleoporin 58	-2.102	6.34
204439_at	IFI44L	interferon induced protein 44 like	3.186	3.437
204444_at	KIF11	kinesin family member 11	1.905	5.026
204446_s_at	ALOX5	arachidonate 5-lipoxygenase	2.137	4.712
204447_at	LZTS3	leucine zipper tumor suppressor family member 3	-2.752	14.11
204457_s_at	GAS1	growth arrest specific 1	1.394	2.937
204462_s_at	SLC16A2	solute carrier family 16 member 2	1.088	3.844
204464_s_at	EDNRA	endothelin receptor type A	2.497	6.219
204465_s_at	INA	internexin neuronal intermediate filament protein alpha	-8.841	17.072
204466_s_at	SNCA	synuclein alpha	-1.497	3.174
204469_at	PTPRZ1	protein tyrosine phosphatase, receptor type Z1	2.275	9.601
204476_s_at	PC	pyruvate carboxylase	-1.362	4.637
204479_at	OSTF1	osteoclast stimulating factor 1	-1.277	2.323
204484_at	PIK3C2B	phosphatidylinositol-4-phosphate 3-kinase catalytic subunit type 2 beta	-1.115	4.012
204485_s_at	TOM1L1	target of myb1 like 1 membrane trafficking protein	1.758	4.406
204487_s_at	KCNQ1	potassium voltage-gated channel subfamily Q member 1	1.216	4.808
204488_at	DOLK	dolichol kinase	1.776	7.494
204491_at	PDE4D	phosphodiesterase 4D	-1.297	4.965
204500_s_at	AGTPBP1	ATP/GTP binding protein 1	-1.237	7.223
204505_s_at	DMTN	dematin actin binding protein	-4.799	11.586
204506_at	PPP3R1	protein phosphatase 3 regulatory subunit B, alpha	-2.791	3.754
204513_s_at	ELMO1	engulfment and cell motility 1	-1.755	4.79
204519_s_at	PLLP	plasmolipin	2.3	4.046
204526_s_at	TBC1D8	TBC1 domain family member 8	-1.215	3.298
204540_at	EEF1A2	eukaryotic translation elongation factor 1 alpha 2	-1.122	1.72
204544_at	HPS5	HPS5, biogenesis of lysosomal organelles complex 2 subunit 2	1.465	7.246
204545_at	PEX6	peroxisomal biogenesis factor 6	-1.173	3.544
204546_at	KIAA0513	KIAA0513	-3.371	16.39
204547_at	RAB40B	RAB40B, member RAS oncogene family	-1.344	4.829
204548_at	STAR	steroidogenic acute regulatory protein	-2.126	4.142
204561_x_at	APOC4-APOC2///APOC4///APOC2	APOC4-APOC2 readthrough (NMD candidate)///apolipoprotein C4///apolipoprotein C2	1.891	5.398
204563_at	SELL	selectin L	2.258	2.89
204565_at	ACOT13	acyl-CoA thioesterase 13	-1.358	3.337
204567_s_at	ABCG1	ATP binding cassette subfamily G member 1	1.25	3.293
204569_at	ICK	intestinal cell (MAK-like) kinase	1.868	3.184
204570_at	COX7A1	cytochrome c oxidase subunit 7A1	-3.741	8.592
204575_s_at	MMP19	matrix metallopeptidase 19	3.13	6.755
204578_at	PPIP5K1	diphosphoinositol pentakisphosphate kinase 1	-2.089	5.882
204584_at	L1CAM	L1 cell adhesion molecule	-5.308	7.986
204586_at	BSN	bassoon presynaptic cytomatrix protein	-5.79	12.095
204587_at	SLC25A14	solute carrier family 25 member 14	-1.788	10.224
204588_s_at	SLC7A7	solute carrier family 7 member 7	2.255	5.643
204589_at	NUAK1	NUAK family kinase 1	-2.332	7.69
204591_at	CHL1	cell adhesion molecule L1 like	1.344	2.778
204592_at	DLG4	discs large MAGUK scaffold protein 4	-2.869	9.384
204600_at	EPHB3	EPH receptor B3	-1.312	4.449
204610_s_at	CCDC85B	coiled-coil domain containing 85B	-1.021	3.586
204611_s_at	PPP2R5B	protein phosphatase 2 regulatory subunit B'beta	-1.254	6.609
204613_at	PLCG2	phospholipase C gamma 2	1.447	3.711
204620_s_at	VCAN	versican	4.43	13.754
204633_s_at	RPS6KA5	ribosomal protein S6 kinase A5	-1.778	4.346
204641_at	NEK2	NIMA related kinase 2	-1.876	1.83
204642_at	S1PR1	sphingosine-1-phosphate receptor 1	-1.533	3.037
204646_at	DPYD	dihydropyrimidine dehydrogenase	3.022	6.728
204650_s_at	MIR6831///APBB3	microRNA 6831///amyloid beta precursor protein binding family B member 3	-1.638	8.53
204662_at	CCP110	centriolar coiled-coil protein 110	-1.634	6.652
204670_x_at	LOC100996809///HLA-DRB4///HLA-DRB1	HLA class II histocompatibility antigen, DRB1-10 beta chain-like///major histocompatibility complex, class II, DR beta 4///major histocompatibility complex, class II, DR beta 1	3.598	8.114
204679_at	KCNK1	potassium two pore domain channel subfamily K member 1	-1.502	2.443
204681_s_at	RAPGEF5	Rap guanine nucleotide exchange factor 5	-4.479	12.315
204684_at	NPTX1	neuronal pentraxin 1	-4.418	5.646
204685_s_at	ATP2B2	ATPase plasma membrane Ca2+ transporting 2	-4.535	15.345
204693_at	CDC42EP1	CDC42 effector protein 1	2.096	2.091
204697_s_at	CHGA	chromogranin A	-5.351	10.288
204711_at	KIAA0753	KIAA0753	-1.219	4.944
204712_at	WIF1	WNT inhibitory factor 1	-2.843	1.756
204718_at	EPHB6	EPH receptor B6	-5.122	10.87
204720_s_at	DNAJC6	DnaJ heat shock protein family (Hsp40) member C6	-2.182	14.08
204723_at	SCN3B	sodium voltage-gated channel beta subunit 3	-8.077	7.656
204724_s_at	COL9A3	collagen type IX alpha 3 chain	3.657	6.213
204729_s_at	STX1A	syntaxin 1A	-6.108	12.647
204730_at	RIMS3	regulating synaptic membrane exocytosis 3	-6.008	12.146
204735_at	PDE4A	phosphodiesterase 4A	-1.678	10.691
204736_s_at	CSPG4	chondroitin sulfate proteoglycan 4	6.025	11.298
204740_at	CNKSR1	connector enhancer of kinase suppressor of Ras 1	-1.024	3.898
204743_at	TAGLN3	transgelin 3	-3.361	13.325
204746_s_at	PICK1	protein interacting with PRKCA 1	-1.874	3.785
204749_at	NAP1L3	nucleosome assembly protein 1 like 3	-1.023	3.979
204753_s_at	HLF	HLF, PAR bZIP transcription factor	-3.015	3.709
204757_s_at	C2CD2L	C2CD2 like	-2.022	8.757
204761_at	USP6NL	USP6 N-terminal like	1.039	4.416
204765_at	ARHGEF5	Rho guanine nucleotide exchange factor 5	1.546	3.216
204767_s_at	FEN1	flap structure-specific endonuclease 1	-1.135	4.487
204775_at	CHAF1B	chromatin assembly factor 1 subunit B	-1.112	4.619
204776_at	THBS4	thrombospondin 4	3.664	5.734
204777_s_at	MAL	mal, T-cell differentiation protein	-3.916	5.231
204780_s_at	FAS	Fas cell surface death receptor	3.518	6.396
204785_x_at	IFNAR2	interferon alpha and beta receptor subunit 2	1.013	5.811
204787_at	VSIG4	V-set and immunoglobulin domain containing 4	1.651	5.708
204793_at	GPRASP1	G protein-coupled receptor associated sorting protein 1	-1.364	5.201
204794_at	DUSP2	dual specificity phosphatase 2	-1.313	2.886
204799_at	ZBED4	zinc finger BED-type containing 4	1.014	1.849
204803_s_at	RRAD	RRAD, Ras related glycolysis inhibitor and calcium channel regulator	-1.484	2.288
204804_at	TRIM21	tripartite motif containing 21	1.985	6.904
204811_s_at	CACNA2D2	calcium voltage-gated channel auxiliary subunit alpha2delta 2	-2.124	5.688
204813_at	MAPK10	mitogen-activated protein kinase 10	-1.194	4.363
204820_s_at	BTN3A2///BTN3A3	butyrophilin subfamily 3 member A2///butyrophilin subfamily 3 member A3	3.433	13.177
204822_at	TTK	TTK protein kinase	1.225	4.901
204823_at	NAV3	neuron navigator 3	-2.657	8.036
204825_at	MELK	maternal embryonic leucine zipper kinase	2.493	7.313
204826_at	CCNF	cyclin F	-1.657	5.834
204828_at	RAD9A	RAD9 checkpoint clamp component A	-1.243	3.751
204835_at	POLA1	DNA polymerase alpha 1, catalytic subunit	1.19	2.378
204836_at	GLDC	glycine decarboxylase	2.679	7.915
204844_at	ENPEP	glutamyl aminopeptidase	1.616	2.1
204865_at	CA3	carbonic anhydrase 3	1.128	3.699
204866_at	JADE3	jade family PHD finger 3	1.124	2.147
204869_at	PCSK2	proprotein convertase subtilisin/kexin type 2	-4.826	8.022
204874_x_at	BAIAP3	BAI1 associated protein 3	-2.25	4.847
204889_s_at	NEURL1	neuralized E3 ubiquitin protein ligase 1	-2.835	6.512
204893_s_at	ZFYVE9	zinc finger FYVE-type containing 9	-1.089	2.865
204897_at	PTGER4	prostaglandin E receptor 4	2.268	3.627
204908_s_at	MIR8085///BCL3	microRNA 8085///B-cell CLL/lymphoma 3	1.217	2.647
204912_at	IL10RA	interleukin 10 receptor subunit alpha	1.93	2.983
204916_at	RAMP1	receptor activity modifying protein 1	1.332	3.171
204919_at	PRH1-PRR4///PRR4	PRH1-PRR4 readthrough///proline rich 4 (lacrimal)	-1.521	5.697
204920_at	CPS1	carbamoyl-phosphate synthase 1	1.039	1.879
204922_at	C11orf80	chromosome 11 open reading frame 80	-1.771	4.79
204923_at	SASH3	SAM and SH3 domain containing 3	2.281	5.372
204924_at	TLR2	toll like receptor 2	2.455	5.343
204927_at	RASSF7	Ras association domain family member 7	-1.78	5.718
204929_s_at	VAMP5	vesicle associated membrane protein 5	2.459	6.557
204932_at	TNFRSF11B	TNF receptor superfamily member 11b	2.241	4.358
204936_at	MAP4K2	mitogen-activated protein kinase kinase kinase kinase 2	-1.358	4.081
204945_at	PTPRN	protein tyrosine phosphatase, receptor type N	-4.015	7.043
204947_at	E2F1	E2F transcription factor 1	-1.299	3.994
204948_s_at	FST	follistatin	2.758	5.756
204953_at	SNAP91	synaptosome associated protein 91	-2.404	7.262
204955_at	SRPX	sushi repeat containing protein, X-linked	4.223	7.686
204959_at	MNDA	myeloid cell nuclear differentiation antigen	2.643	5.744
204970_s_at	MAFG	MAF bZIP transcription factor G	-1.495	4.497
204971_at	CSTA	cystatin A	3.775	6.181
204972_at	OAS2	2'-5'-oligoadenylate synthetase 2	2.031	1.803
204973_at	GJB1	gap junction protein beta 1	-1.146	1.708
204974_at	RAB3A	RAB3A, member RAS oncogene family	-4.302	8.633
204977_at	DDX10	DEAD-box helicase 10	-1.711	4.713
204981_at	SLC22A18	solute carrier family 22 member 18	1.576	3.9
204984_at	GPC4	glypican 4	1.478	2.308
204990_s_at	ITGB4	integrin subunit beta 4	2.842	4.449
204993_at	GNAZ	G protein subunit alpha z	-2.202	9.083
204994_at	MX2	MX dynamin like GTPase 2	1.077	2.119
204995_at	CDK5R1	cyclin dependent kinase 5 regulatory subunit 1	-3.242	8.715
205000_at	DDX3Y	DEAD-box helicase 3, Y-linked	-4.365	4.045
205004_at	NKRF	NFKB repressing factor	-1.187	8.878
205006_s_at	NMT2	N-myristoyltransferase 2	-1.899	9.482
205012_s_at	HAGH	hydroxyacylglutathione hydrolase	-1.494	9.407
205016_at	TGFA	transforming growth factor alpha	3.114	3.895
205019_s_at	VIPR1	vasoactive intestinal peptide receptor 1	-3.905	4.62
205020_s_at	ARL4A	ADP ribosylation factor like GTPase 4A	1.297	2.925
205027_s_at	MAP3K8	mitogen-activated protein kinase kinase kinase 8	1.484	3.275
205030_at	FABP7	fatty acid binding protein 7	2.172	5.736
205047_s_at	ASNS	asparagine synthetase (glutamine-hydrolyzing)	-1.527	6.496
205050_s_at	MAPK8IP2	mitogen-activated protein kinase 8 interacting protein 2	-2.751	12.035
205051_s_at	KIT	KIT proto-oncogene receptor tyrosine kinase	-2.678	7.173
205052_at	AUH	AU RNA binding methylglutaconyl-CoA hydratase	-1.557	8.149
205059_s_at	IDUA	iduronidase, alpha-L-	2.202	5.169
205066_s_at	ENPP1	ectonucleotide pyrophosphatase/phosphodiesterase 1	1.303	4.075
205067_at	IL1B	interleukin 1 beta	4.197	7.015
205076_s_at	MTMR11	myotubularin related protein 11	2.861	7.953
205081_at	CRIP1	cysteine rich protein 1	1.667	1.967
205083_at	AOX1	aldehyde oxidase 1	3.809	10.979
205090_s_at	NAGPA	N-acetylglucosamine-1-phosphodiester alpha-N-acetylglucosaminidase	-1.759	3.789
205094_at	PEX12	peroxisomal biogenesis factor 12	1.1	5.105
205098_at	CCR1	C-C motif chemokine receptor 1	2.996	6.957
205101_at	CIITA	class II major histocompatibility complex transactivator	1.428	4.384
205104_at	SNPH	syntaphilin	-1.447	3.298
205109_s_at	LOC101930241///ARHGEF4	rho guanine nucleotide exchange factor 4-like///Rho guanine nucleotide exchange factor 4	-1.781	4.011
205110_s_at	FGF13	fibroblast growth factor 13	-4.227	3.84
205112_at	PLCE1	phospholipase C epsilon 1	3.364	10.768
205113_at	NEFM	neurofilament, medium polypeptide	-7.855	12.245
205114_s_at	CCL3L3///CCL3L1///CCL3	C-C motif chemokine ligand 3 like 3///C-C motif chemokine ligand 3 like 1///C-C motif chemokine ligand 3	6.864	9.693
205122_at	MSANTD3-TMEFF1///TMEFF1	MSANTD3-TMEFF1 readthrough///transmembrane protein with EGF like and two follistatin like domains 1	-1.502	3.036
205126_at	VRK2	vaccinia related kinase 2	1.455	2.519
205132_at	ACTC1	actin, alpha, cardiac muscle 1	1.178	2.635
205139_s_at	UST	uronyl 2-sulfotransferase	1.101	2.894
205140_at	FPGT	fucose-1-phosphate guanylyltransferase	1.417	3.674
205141_at	ANG	angiogenin	1.234	4.523
205147_x_at	NCF4	neutrophil cytosolic factor 4	2.217	6.317
205155_s_at	SPTBN2	spectrin beta, non-erythrocytic 2	-3.006	6.111
205156_s_at	ASIC1	acid sensing ion channel subunit 1	1.316	3.1
205157_s_at	KRT17///JUP	keratin 17///junction plakoglobin	-1.116	3.871
205159_at	CSF2RB	colony stimulating factor 2 receptor beta common subunit	1.982	3.502
205162_at	ERCC8	ERCC excision repair 8, CSA ubiquitin ligase complex subunit	1.755	5.227
205171_at	PTPN4	protein tyrosine phosphatase, non-receptor type 4	-2.342	6.929
205173_x_at	CD58	CD58 molecule	2.225	7.479
205182_s_at	ZNF324	zinc finger protein 324	-1.289	4.901
205190_at	PLS1	plastin 1	-3.077	2.616
205191_at	RP2	retinitis pigmentosa 2 (X-linked recessive)	2.454	6.41
205198_s_at	ATP7A	ATPase copper transporting alpha	2.315	7.54
205200_at	EXOSC7///CLEC3B	exosome component 7///C-type lectin domain family 3 member B	-1.838	1.871
205204_at	NMB	neuromedin B	2.438	6.257
205227_at	IL1RAP	interleukin 1 receptor accessory protein	4.601	11.281
205230_at	RPH3A	rabphilin 3A	-6.384	13.989
205234_at	SLC16A4	solute carrier family 16 member 4	2.369	5.649
205236_x_at	SOD3	superoxide dismutase 3, extracellular	2.48	3.805
205244_s_at	SLC13A3	solute carrier family 13 member 3	-1.507	2.818
205245_at	PARD6A	par-6 family cell polarity regulator alpha	-2.414	7.363
205248_at	DOPEY2	dopey family member 2	-1.111	2.152
205249_at	EGR2	early growth response 2	2.743	1.848
205251_at	PER2	period circadian clock 2	-1.24	3.828
205257_s_at	AMPH	amphiphysin	-2.952	8.902
205259_at	NR3C2	nuclear receptor subfamily 3 group C member 2	-1.635	3.572
205260_s_at	ACYP1	acylphosphatase 1	-1.936	6.545
205265_s_at	LOC100996693///SPEG	CAVP-target protein-like///SPEG complex locus	-1.179	2.583
205266_at	LIF	leukemia inhibitory factor	2.587	8.17
205269_at	LCP2	lymphocyte cytosolic protein 2	2.042	4.557
205271_s_at	CDK20	cyclin dependent kinase 20	-1.417	3.748
205278_at	GAD1	glutamate decarboxylase 1	-1.881	2.237
205289_at	BMP2	bone morphogenetic protein 2	3.274	7.738
205294_at	BAIAP2	BAI1 associated protein 2	-2.699	5.024
205295_at	CKMT2	creatine kinase, mitochondrial 2	-1.212	2.443
205296_at	RBL1	RB transcriptional corepressor like 1	2.346	8.285
205298_s_at	BTN2A2	butyrophilin subfamily 2 member A2	2.365	6.358
205302_at	IGFBP1	insulin like growth factor binding protein 1	1.713	3.707
205312_at	SPI1	Spi-1 proto-oncogene	1.414	4.969
205316_at	SLC15A2	solute carrier family 15 member 2	-1.669	3.588
205325_at	PHYHIP	phytanoyl-CoA 2-hydroxylase interacting protein	-4.296	9.651
205328_at	CLDN10	claudin 10	-1.773	2.74
205336_at	PVALB	parvalbumin	-7.116	6.876
205345_at	BARD1	BRCA1 associated RING domain 1	2.135	6.024
205347_s_at	TMSB15B///TMSB15A	thymosin beta 15B///thymosin beta 15a	5.154	9.811
205348_s_at	DYNC1I1	dynein cytoplasmic 1 intermediate chain 1	-4.615	12.494
205350_at	CRABP1	cellular retinoic acid binding protein 1	-3.864	5.23
205352_at	SERPINI1	serpin family I member 1	-4.266	8.469
205359_at	AKAP6	A-kinase anchoring protein 6	-3.556	10.549
205373_at	CTNNA2	catenin alpha 2	-1.219	2.737
205375_at	MDFI	MyoD family inhibitor	2.209	5.363
205378_s_at	ACHE	acetylcholinesterase (Cartwright blood group)	1.882	1.815
205379_at	CBR3	carbonyl reductase 3	1.564	4.473
205381_at	LRRC17	leucine rich repeat containing 17	1.973	2.681
205383_s_at	ZBTB20	zinc finger and BTB domain containing 20	1.435	4.031
205384_at	FXYD1	FXYD domain containing ion transport regulator 1	-1.813	2.383
205414_s_at	ARHGAP44	Rho GTPase activating protein 44	-4.961	16.767
205419_at	GPR183	G protein-coupled receptor 183	3.121	6.169
205422_s_at	ITGBL1	integrin subunit beta like 1	1.181	1.939
205428_s_at	CALB2	calbindin 2	-2.317	3.035
205433_at	BCHE	butyrylcholinesterase	3.793	10.717
205440_s_at	NPY1R	neuropeptide Y receptor Y1	-3.324	3.438
205441_at	OCEL1	occludin/ELL domain containing 1	-1.211	3.359
205452_at	PIGB	phosphatidylinositol glycan anchor biosynthesis class B	1.037	3.265
205453_at	HOXB2	homeobox B2	2.122	1.776
205454_at	HPCA	hippocalcin	-4.383	9.1
205466_s_at	HS3ST1	heparan sulfate-glucosamine 3-sulfotransferase 1	2.849	4.491
205475_at	SCRG1	stimulator of chondrogenesis 1	1.958	8.162
205478_at	PPP1R1A	protein phosphatase 1 regulatory inhibitor subunit 1A	-5.415	15.024
205479_s_at	PLAU	plasminogen activator, urokinase	6.132	12.177
205483_s_at	ISG15	ISG15 ubiquitin-like modifier	1.603	2.828
205486_at	TESK2	testis-specific kinase 2	-1.483	3.61
205489_at	CRYM	crystallin mu	-6.236	4.593
205493_s_at	DPYSL4	dihydropyrimidinase like 4	-1.171	3.116
205496_at	KIAA0408	KIAA0408	-3.178	7.171
205498_at	GHR	growth hormone receptor	2.689	6.744
205499_at	SRPX2	sushi repeat containing protein, X-linked 2	5.369	15.667
205500_at	C5	complement component 5	1.527	5.224
205501_at	PDE10A	phosphodiesterase 10A	-2.293	5.529
205504_at	BTK	Bruton tyrosine kinase	1.494	3.588
205508_at	SCN1B	sodium voltage-gated channel beta subunit 1	-2.48	5.909
205518_s_at	CMAHP	cytidine monophospho-N-acetylneuraminic acid hydroxylase, pseudogene	1.938	4.322
205543_at	HSPA4L	heat shock protein family A (Hsp70) member 4 like	-1.945	4.617
205549_at	PCP4	Purkinje cell protein 4	-4.882	9.385
205551_at	SV2B	synaptic vesicle glycoprotein 2B	-9.279	9.98
205552_s_at	OAS1	2'-5'-oligoadenylate synthetase 1	3.123	8.225
205561_at	KCTD17	potassium channel tetramerization domain containing 17	-1.287	3.315
205567_at	CHST1	carbohydrate sulfotransferase 1	-2.714	4.611
205571_at	LIPT1	lipoyltransferase 1	1.186	4.993
205573_s_at	SNX7	sorting nexin 7	1.329	3.4
205575_at	C1QL1	complement C1q like 1	5.1	9.067
205577_at	PYGM	phosphorylase, glycogen, muscle	-5.409	3.229
205579_at	HRH1	histamine receptor H1	2.951	4.261
205582_s_at	GGT5	gamma-glutamyltransferase 5	2.341	4.399
205586_x_at	VGF	VGF nerve growth factor inducible	2.481	2.544
205590_at	RASGRP1	RAS guanyl releasing protein 1	-5.362	6.41
205612_at	MMRN1	multimerin 1	2.285	5.215
205616_at	GALNT8///KCNA6	polypeptide N-acetylgalactosaminyltransferase 8///potassium voltage-gated channel subfamily A member 6	-1.181	1.686
205626_s_at	CALB1	calbindin 1	-8.31	11.453
205630_at	CRH	corticotropin releasing hormone	-5.889	8.455
205632_s_at	PIP5K1B	phosphatidylinositol-4-phosphate 5-kinase type 1 beta	-4.679	9.323
205637_s_at	SH3GL3	SH3 domain containing GRB2 like 3, endophilin A3	-9.038	23.496
205638_at	ADGRB3	adhesion G protein-coupled receptor B3	-1.05	2.338
205642_at	CNTRL	centriolin	1.237	3.578
205646_s_at	PAX6	paired box 6	-3.766	5.74
205659_at	HDAC9	histone deacetylase 9	-1.184	3.146
205664_at	KIN	Kin17 DNA and RNA binding protein	1.036	3.256
205668_at	LY75	lymphocyte antigen 75	3.314	8.205
205670_at	GAL3ST1	galactose-3-O-sulfotransferase 1	3.196	4.395
205677_s_at	DLEU1	deleted in lymphocytic leukemia 1	1.458	5.615
205678_at	AP3B2	adaptor related protein complex 3 beta 2 subunit	-2.551	6.918
205681_at	BCL2A1	BCL2 related protein A1	1.479	1.757
205685_at	CD86	CD86 molecule	1.737	5.366
205691_at	SYNGR3	synaptogyrin 3	-5.248	12.908
205697_at	SCGN	secretagogin, EF-hand calcium binding protein	-1.349	1.695
205708_s_at	TRPM2	transient receptor potential cation channel subfamily M member 2	-2.468	6.225
205709_s_at	CDS1	CDP-diacylglycerol synthase 1	-5.38	9.962
205715_at	BST1	bone marrow stromal cell antigen 1	1.409	7.082
205719_s_at	LOC101929036///PAH	uncharacterized LOC101929036///phenylalanine hydroxylase	-2.286	2.58
205721_at	GFRA2	GDNF family receptor alpha 2	-2.029	6.055
205726_at	DIAPH2	diaphanous related formin 2	1.346	1.905
205728_at	TENM1	teneurin transmembrane protein 1	-2.061	2.984
205733_at	BLM	Bloom syndrome RecQ like helicase	4.808	11.511
205737_at	KCNQ2	potassium voltage-gated channel subfamily Q member 2	-2.847	7.985
205739_x_at	ZNF107	zinc finger protein 107	1.65	4.922
205744_at	DOC2A	double C2 domain alpha	-3.175	8.097
205751_at	SH3GL2	SH3 domain containing GRB2 like 2, endophilin A1	-4.079	10.834
205766_at	TCAP	titin-cap	-2.033	6.889
205774_at	F12	coagulation factor XII	2.922	5.291
205776_at	FMO5	flavin containing monooxygenase 5	1.972	4.428
205786_s_at	ITGAM	integrin subunit alpha M	1.856	5.281
205789_at	CD1D	CD1d molecule	1.713	6.472
205802_at	TRPC1	transient receptor potential cation channel subfamily C member 1	-1.143	5.702
205806_at	ROM1	retinal outer segment membrane protein 1	1.144	3.078
205807_s_at	TUFT1	tuftelin 1	-1.462	5.799
205812_s_at	TMED9	transmembrane p24 trafficking protein 9	1.018	6.933
205814_at	GRM3	glutamate metabotropic receptor 3	-7.15	15.18
205818_at	BRINP1	BMP/retinoic acid inducible neural specific 1	-1.707	3.618
205821_at	KLRC4-KLRK1///KLRK1	KLRC4-KLRK1 readthrough///killer cell lectin like receptor K1	2.781	8.168
205826_at	MYOM2	myomesin 2	-1.073	4.024
205827_at	CCK	cholecystokinin	-7.013	8.134
205830_at	CLGN	calmegin	-2.407	3.389
205839_s_at	TSPOAP1	TSPO associated protein 1	-1.942	5.057
205844_at	VNN1	vanin 1	1.08	4.044
205851_at	NME6	NME/NM23 nucleoside diphosphate kinase 6	1.662	5.489
205852_at	CDK5R2	cyclin dependent kinase 5 regulatory subunit 2	-5.954	12.249
205856_at	SLC14A1	solute carrier family 14 member 1 (Kidd blood group)	-2.879	2.47
205858_at	NGFR	nerve growth factor receptor	3.162	4.693
205859_at	LY86	lymphocyte antigen 86	2.721	7.003
205862_at	GREB1	growth regulation by estrogen in breast cancer 1	-1.445	3.364
205874_at	ITPKA	inositol-trisphosphate 3-kinase A	-5.595	9.007
205878_at	POU6F1	POU class 6 homeobox 1	-1.582	8.788
205880_at	PRKD1	protein kinase D1	3.603	11.34
205891_at	ADORA2B	adenosine A2b receptor	-2.603	1.815
205893_at	NLGN1	neuroligin 1	1.657	7.888
205896_at	SLC22A4	solute carrier family 22 member 4	1.977	4.938
205898_at	CX3CR1	C-X3-C motif chemokine receptor 1	2.584	4.333
205899_at	CCNA1	cyclin A1	-3.972	8.045
205901_at	PNOC	prepronociceptin	-4.392	2.942
205906_at	FOXJ1	forkhead box J1	1.496	3.23
205909_at	POLE2	DNA polymerase epsilon 2, accessory subunit	1.665	4.173
205911_at	PTH1R	parathyroid hormone 1 receptor	-1.61	5.686
205918_at	SLC4A3	solute carrier family 4 member 3	-2.098	6.177
205923_at	RELN	reelin	-5.942	8.57
205934_at	PLCL1	phospholipase C like 1	-1.398	4.259
205946_at	VIPR2	vasoactive intestinal peptide receptor 2	-1.309	2.419
205948_at	PTPRT	protein tyrosine phosphatase, receptor type T	-4.293	6.019
205950_s_at	CA1	carbonic anhydrase 1	-1.192	3.371
205952_at	KCNK3	potassium two pore domain channel subfamily K member 3	-6.434	15.43
205953_at	LRIG2	leucine rich repeats and immunoglobulin like domains 2	1.295	6.549
205957_at	PLXNB3	plexin B3	2.018	2.454
205967_at	HIST2H4B///HIST4H4///HIST2H4A///HIST1H4L///HIST1H4E///HIST1H4B///HIST1H4H///HIST1H4C///HIST1H4J///HIST1H4K///HIST1H4F///HIST1H4D///HIST1H4A///HIST1H4I	histone cluster 2, H4b///histone cluster 4, H4///histone cluster 2, H4a///histone cluster 1, H4l///histone cluster 1, H4e///histone cluster 1, H4b///histone cluster 1, H4h///histone cluster 1, H4c///histone cluster 1, H4j///histone cluster 1, H4k///histone cluster 1, H4f///histone cluster 1, H4d///histone cluster 1, H4a///histone cluster 1, H4i	-1.795	4.059
205984_at	CRHBP	corticotropin releasing hormone binding protein	-3.008	5.226
205986_at	AATK	apoptosis associated tyrosine kinase	-2.639	8.513
205990_s_at	WNT5A	Wnt family member 5A	3.487	8.515
205997_at	ADAM28	ADAM metallopeptidase domain 28	3.193	7.951
206001_at	NPY	neuropeptide Y	-5.877	8.704
206003_at	CEP135	centrosomal protein 135	1.663	6.261
206014_at	ACTL6B	actin like 6B	-6.154	13.052
206017_at	KIAA0319	KIAA0319	-5.972	12.391
206018_at	FOXG1	forkhead box G1	-5.694	4.648
206023_at	NMU	neuromedin U	-3.125	5.907
206026_s_at	TNFAIP6	TNF alpha induced protein 6	2.305	3.113
206030_at	ASPA	aspartoacylase	-4.872	4.685
206034_at	SERPINB8	serpin family B member 8	1.374	4.841
206059_at	ZNF91	zinc finger protein 91	-1.273	3.48
206068_s_at	ACADL	acyl-CoA dehydrogenase, long chain	1.068	3.951
206072_at	UCN	urocortin	-1.473	4.704
206074_s_at	HMGA1	high mobility group AT-hook 1	1.312	3.101
206076_at	LRRC23	leucine rich repeat containing 23	-1.302	4.238
206080_at	PLCH2	phospholipase C eta 2	-3.384	3.472
206081_at	SLC24A1	solute carrier family 24 member 1	1.866	5.331
206082_at	HCP5	HLA complex P5 (non-protein coding)	3.061	10.933
206089_at	NELL1	neural EGFL like 1	-4.579	5.47
206090_s_at	TSNAX-DISC1///DISC1	TSNAX-DISC1 readthrough (NMD candidate)///disrupted in schizophrenia 1	3.458	10.49
206098_at	ZBTB6	zinc finger and BTB domain containing 6	1.796	3.628
206100_at	CPM	carboxypeptidase M	1.15	1.728
206101_at	ECM2	extracellular matrix protein 2	3.628	4.169
206107_at	RGS11	regulator of G-protein signaling 11	-1.997	3.298
206109_at	FUT1	fucosyltransferase 1 (H blood group)	-1.685	3.877
206111_at	RNASE2	ribonuclease A family member 2	3.42	7.267
206118_at	STAT4	signal transducer and activator of transcription 4	-4.082	9.052
206128_at	ADRA2C	adrenoceptor alpha 2C	-1.598	5.07
206135_at	ST18	ST18, C2H2C-type zinc finger	-4.382	4.272
206152_at	AGAP2	ArfGAP with GTPase domain, ankyrin repeat and PH domain 2	-3.248	5.964
206157_at	PTX3	pentraxin 3	3.686	7.885
206162_x_at	SYT5	synaptotagmin 5	-3.021	6.346
206167_s_at	ARHGAP6	Rho GTPase activating protein 6	2.566	6.01
206182_at	ZNF134	zinc finger protein 134	1.468	3.673
206186_at	MPP3	membrane palmitoylated protein 3	-1.423	1.96
206190_at	GPR17	G protein-coupled receptor 17	7.093	7.877
206191_at	ENTPD3	ectonucleoside triphosphate diphosphohydrolase 3	-3.818	8.007
206196_s_at	RUNDC3A	RUN domain containing 3A	-4.914	11.403
206197_at	NME5	NME/NM23 family member 5	-1.163	2.859
206204_at	GRB14	growth factor receptor bound protein 14	-2.359	2.64
206208_at	CA4	carbonic anhydrase 4	-1.801	3.027
206213_at	WNT10B	Wnt family member 10B	-2.832	5.765
206214_at	PLA2G7	phospholipase A2 group VII	2.137	5.574
206230_at	LHX1	LIM homeobox 1	-1.181	1.969
206231_at	KCNN1	potassium calcium-activated channel subfamily N member 1	-2.911	5.018
206243_at	TIMP4	TIMP metallopeptidase inhibitor 4	5.871	5.105
206247_at	MICB	MHC class I polypeptide-related sequence B	1.498	2.544
206263_at	FMO4	flavin containing monooxygenase 4	1.98	1.934
206267_s_at	MATK	megakaryocyte-associated tyrosine kinase	-3.774	8.054
206271_at	TLR3	toll like receptor 3	3.544	12.087
206280_at	CDH18	cadherin 18	-6.78	7.752
206290_s_at	RGS7	regulator of G-protein signaling 7	-4.026	8.149
206295_at	IL18	interleukin 18	2.786	6.571
206298_at	ARHGAP22	Rho GTPase activating protein 22	2.815	2.716
206306_at	RYR3	ryanodine receptor 3	-2.573	2.857
206308_at	TRDMT1	tRNA aspartic acid methyltransferase 1	1.043	4.88
206309_at	LECT1	leukocyte cell derived chemotaxin 1	1.422	5.041
206314_at	ZKSCAN7	zinc finger with KRAB and SCAN domains 7	1.603	2.599
206316_s_at	KNTC1	kinetochore associated 1	1.185	4.801
206326_at	GRP	gastrin releasing peptide	-1.434	1.807
206331_at	CALCRL	calcitonin receptor like receptor	3.729	6.528
206332_s_at	IFI16	interferon gamma inducible protein 16	3.398	10.116
206339_at	CARTPT	CART prepropeptide	-3.054	6.336
206349_at	LGI1	leucine rich glioma inactivated 1	-6.148	10.393
206362_x_at	MAP3K10	mitogen-activated protein kinase kinase kinase 10	-2.377	6.569
206364_at	KIF14	kinesin family member 14	1.595	7.133
206374_at	LOC101927562///DUSP8	uncharacterized LOC101927562///dual specificity phosphatase 8	-4.515	11.846
206375_s_at	HSPB3	heat shock protein family B (small) member 3	-2.649	5.072
206376_at	SLC6A15	solute carrier family 6 member 15	-5.868	18.857
206382_s_at	BDNF	brain derived neurotrophic factor	-3.663	5.02
206384_at	CACNG3	calcium voltage-gated channel auxiliary subunit gamma 3	-6.495	11.8
206385_s_at	ANK3	ankyrin 3, node of Ranvier (ankyrin G)	-2.218	5.818
206392_s_at	RARRES1	retinoic acid receptor responder 1	4.43	10.693
206395_at	DGKG	diacylglycerol kinase gamma	1.962	1.67
206403_at	ZNF536	zinc finger protein 536	-4.599	6.756
206420_at	IGSF6	immunoglobulin superfamily member 6	1.792	7.623
206424_at	CYP26A1	cytochrome P450 family 26 subfamily A member 1	-1.773	4.627
206436_at	MPPED1	metallophosphoesterase domain containing 1	-3.399	5.597
206444_at	PDE1B	phosphodiesterase 1B	-1.129	3.961
206448_at	ZNF365	zinc finger protein 365	-2.016	3.726
206456_at	GABRA5	gamma-aminobutyric acid type A receptor alpha5 subunit	-5.592	4.873
206458_s_at	WNT2B	Wnt family member 2B	1.254	1.728
206465_at	ACSBG1	acyl-CoA synthetase bubblegum family member 1	-2.747	5.265
206467_x_at	RTEL1-TNFRSF6B///TNFRSF6B	RTEL1-TNFRSF6B readthrough (NMD candidate)///TNF receptor superfamily member 6b	-1.579	4.591
206480_at	LTC4S	leukotriene C4 synthase	1.336	4.637
206502_s_at	INSM1	INSM transcriptional repressor 1	-3.706	2.858
206529_x_at	SLC26A4	solute carrier family 26 member 4	-1.413	2.272
206540_at	GLB1L	galactosidase beta 1 like	1.267	4.819
206547_s_at	PPEF1	protein phosphatase with EF-hand domain 1	-3.223	5.658
206552_s_at	TAC1	tachykinin precursor 1	-7.076	10.892
206557_at	ZNF702P	zinc finger protein 702, pseudogene	-2.011	3.783
206560_s_at	MIA	melanoma inhibitory activity	3.382	3.801
206565_x_at	SMA4	glucuronidase beta pseudogene	1.038	2.306
206574_s_at	PTP4A3	protein tyrosine phosphatase type IVA, member 3	4.197	7.334
206577_at	VIP	vasoactive intestinal peptide	-3.806	5.836
206580_s_at	EFEMP2	EGF containing fibulin like extracellular matrix protein 2	1.67	10.442
206584_at	LY96	lymphocyte antigen 96	3.405	8.233
206613_s_at	TAF1A	TATA-box binding protein associated factor, RNA polymerase I subunit A	1.684	4.733
206622_at	TRH	thyrotropin releasing hormone	4.031	4.893
206632_s_at	APOBEC3B	apolipoprotein B mRNA editing enzyme catalytic subunit 3B	1.519	5.712
206645_s_at	NR0B1	nuclear receptor subfamily 0 group B member 1	4.924	11.213
206655_s_at	SEPT5-GP1BB///SEPT5///GP1BB	SEPT5-GP1BB readthrough///septin 5///glycoprotein Ib platelet beta subunit	-3.024	9.867
206690_at	ASIC2	acid sensing ion channel subunit 2	-1.128	1.776
206693_at	IL7	interleukin 7	1.006	3.726
206695_x_at	ZNF43	zinc finger protein 43	1.096	2.561
206698_at	XK	X-linked Kx blood group	-4.365	8.121
206700_s_at	KDM5D	lysine demethylase 5D	-3.853	3.928
206726_at	HPGDS	hematopoietic prostaglandin D synthase	3.625	8.48
206729_at	TNFRSF8	TNF receptor superfamily member 8	1.334	3.465
206743_s_at	ASGR1	asialoglycoprotein receptor 1	-1.333	3.55
206766_at	ITGA10	integrin subunit alpha 10	1.912	3.13
206772_at	PTH2R	parathyroid hormone 2 receptor	-1.149	3.642
206780_at	GAD2	glutamate decarboxylase 2	-6.424	17.682
206785_s_at	KLRC2///KLRC1	killer cell lectin like receptor C2///killer cell lectin like receptor C1	5.73	5.538
206793_at	PNMT	phenylethanolamine N-methyltransferase	-1.298	4.795
206803_at	PDYN	prodynorphin	-2.124	4.507
206805_at	SEMA3A	semaphorin 3A	2.616	4.845
206811_at	ADCY8	adenylate cyclase 8	-2.005	3.035
206818_s_at	CNNM2	cyclin and CBS domain divalent metal cation transport mediator 2	-1.052	1.969
206825_at	OXTR	oxytocin receptor	1.837	2.002
206826_at	PMP2	peripheral myelin protein 2	2.067	7.935
206842_at	KCND1	potassium voltage-gated channel subfamily D member 1	2.246	4.89
206850_at	RASL10A	RAS like family 10 member A	-3.591	3.987
206851_at	RNASE3	ribonuclease A family member 3	1.244	5.558
206857_s_at	FKBP1B	FK506 binding protein 1B	-1.377	6.547
206858_s_at	HOXC6	homeobox C6	2.124	2.391
206869_at	CHAD	chondroadherin	4.807	5.156
206874_s_at	SLK	STE20 like kinase	-1.077	5.879
206878_at	DAO	D-amino acid oxidase	-2.363	2.904
206888_s_at	ARHGDIG	Rho GDP dissociation inhibitor gamma	-6.135	14.406
206898_at	CDH19	cadherin 19	4.489	2.5
206899_at	NTSR2	neurotensin receptor 2	-5.342	2.622
206905_s_at	MATN1	matrilin 1, cartilage matrix protein	1.037	3.324
206906_at	ICAM5	intercellular adhesion molecule 5	-2.502	5.947
206907_at	TNFSF9	tumor necrosis factor superfamily member 9	-1.063	2.225
206915_at	NKX2-2	NK2 homeobox 2	3.528	5.173
206928_at	ZNF124	zinc finger protein 124	1.353	2.682
206932_at	CH25H	cholesterol 25-hydroxylase	3.981	7.463
206935_at	PCDH8	protocadherin 8	-4.263	4.868
206941_x_at	SEMA3E	semaphorin 3E	4.287	4.287
206950_at	SCN9A	sodium voltage-gated channel alpha subunit 9	3.786	9.408
206953_s_at	ADGRL2	adhesion G protein-coupled receptor L2	-2.137	3.729
206960_at	LPAR4	lysophosphatidic acid receptor 4	1.88	5.929
206976_s_at	HSPH1	heat shock protein family H (Hsp110) member 1	-1.923	7.667
206989_s_at	SCAF11	SR-related CTD associated factor 11	1.724	5.36
206990_at	TNR	tenascin R	1.237	3.159
206991_s_at	CCR5	C-C motif chemokine receptor 5 (gene/pseudogene)	2.36	5.152
206999_at	IL12RB2	interleukin 12 receptor subunit beta 2	-1.621	4.543
207006_s_at	CCDC106	coiled-coil domain containing 106	-1.055	3.429
207010_at	GABRB1	gamma-aminobutyric acid type A receptor beta1 subunit	-4.398	5.628
207011_s_at	PTK7	protein tyrosine kinase 7 (inactive)	1.369	3.585
207014_at	GABRA2	gamma-aminobutyric acid type A receptor alpha2 subunit	-5.765	8.686
207025_at	GJC2	gap junction protein gamma 2	-1.646	4.659
207030_s_at	CSRP2	cysteine and glycine rich protein 2	2.247	8.138
207035_at	SLC30A3	solute carrier family 30 member 3	-3.975	5.769
207043_s_at	SLC6A9	solute carrier family 6 member 9	1.965	4.814
207054_at	IMPG1	interphotoreceptor matrix proteoglycan 1	-1.049	3.129
207063_at	TTTY14	testis-specific transcript, Y-linked 14 (non-protein coding)	-2.067	2.566
207068_at	ZFP37	ZFP37 zinc finger protein	1.977	4.719
207070_at	RGR	retinal G protein coupled receptor	-2.958	6.932
207075_at	NLRP3	NLR family pyrin domain containing 3	1.928	2.343
207076_s_at	ASS1	argininosuccinate synthase 1	-2.875	4.759
207081_s_at	PI4KA	phosphatidylinositol 4-kinase alpha	-2.726	9.43
207085_x_at	CSF2RA	colony stimulating factor 2 receptor alpha subunit	2.065	4.961
207091_at	P2RX7	purinergic receptor P2X 7	1.965	3.558
207107_at	RPE65	RPE65, retinoid isomerohydrolase	1.152	1.885
207110_at	LOC100996843///KCNJ18///KCNJ12	ATP-sensitive inward rectifier potassium channel 12-like///potassium voltage-gated channel subfamily J member 18///potassium voltage-gated channel subfamily J member 12	-2.844	6.637
207113_s_at	TNF	tumor necrosis factor	1.799	2.835
207135_at	HTR2A	5-hydroxytryptamine receptor 2A	-4.651	4.036
207144_s_at	CITED1	Cbp/p300 interacting transactivator with Glu/Asp rich carboxy-terminal domain 1	2.937	3.83
207147_at	DLX2	distal-less homeobox 2	-2.829	4.436
207149_at	CDH12	cadherin 12	-5.395	11.118
207153_s_at	GLMN	glomulin, FKBP associated protein	-1.178	3.272
207157_s_at	GNG5	G protein subunit gamma 5	1.304	8.186
207165_at	HMMR	hyaluronan mediated motility receptor	1.54	2.897
207169_x_at	MIR4640///DDR1	microRNA 4640///discoidin domain receptor tyrosine kinase 1	2.361	9.852
207173_x_at	CDH11	cadherin 11	2.399	8.265
207191_s_at	ISLR	immunoglobulin superfamily containing leucine rich repeat	2.049	2.073
207227_x_at	RFPL2	ret finger protein like 2	-2.462	8.858
207250_at	SIX6	SIX homeobox 6	2.073	2.467
207299_s_at	GRM1	glutamate metabotropic receptor 1	-6.554	10.383
207307_at	HTR2C	5-hydroxytryptamine receptor 2C	-4.168	7.985
207312_at	PHKG1	phosphorylase kinase catalytic subunit gamma 1	1.883	4.237
207383_s_at	RHBDL1	rhomboid like 1	-2.803	4.078
207400_at	NPY5R	neuropeptide Y receptor Y5	-1.336	4.495
207404_s_at	HTR1E	5-hydroxytryptamine receptor 1E	-1.203	4.895
207414_s_at	LOC100507472///PCSK6	uncharacterized LOC100507472///proprotein convertase subtilisin/kexin type 6	-2.162	2.194
207443_at	NR2E1	nuclear receptor subfamily 2 group E member 1	-4.635	5.092
207447_s_at	MGAT4C	MGAT4 family member C	-2.093	4.709
207498_s_at	LOC101929829///CYP2D6///CYP2D7	cytochrome P450 family 2 subfamily D member 6 pseudogene///cytochrome P450 family 2 subfamily D member 6///cytochrome P450 family 2 subfamily D member 7 (gene/pseudogene)	-1.077	4.947
207511_s_at	CNPPD1	cyclin Pas1/PHO80 domain containing 1	1.184	2.164
207540_s_at	SYK	spleen associated tyrosine kinase	1.943	6.684
207541_s_at	EXOSC10	exosome component 10	1.149	4.641
207543_s_at	P4HA1	prolyl 4-hydroxylase subunit alpha 1	1.422	4.102
207556_s_at	DGKZ	diacylglycerol kinase zeta	-3.167	7.907
207561_s_at	ABCB8///ASIC3	ATP binding cassette subfamily B member 8///acid sensing ion channel subunit 3	-1.017	1.85
207571_x_at	THEMIS2	thymocyte selection associated family member 2	1.311	2.062
207583_at	ABCD2	ATP binding cassette subfamily D member 2	-1.456	3.223
207593_at	ABCG4	ATP binding cassette subfamily G member 4	-3.035	5.179
207606_s_at	ARHGAP12	Rho GTPase activating protein 12	1.82	9.707
207610_s_at	ADGRE2	adhesion G protein-coupled receptor E2	1.197	5.337
207621_s_at	PEMT	phosphatidylethanolamine N-methyltransferase	1.073	4.051
207639_at	FZD9	frizzled class receptor 9	1.337	2.374
207643_s_at	TNFRSF1A	TNF receptor superfamily member 1A	2.697	9.179
207655_s_at	BLNK	B-cell linker	3.992	7.499
207705_s_at	NINL	ninein like	1.48	2.926
207714_s_at	SERPINH1	serpin family H member 1	2.693	3.4
207723_s_at	KLRC3	killer cell lectin like receptor C3	5.096	9.34
207729_at	CDH9	cadherin 9	-2.45	5.701
207767_s_at	EGR4	early growth response 4	-4.725	6.99
207808_s_at	PROS1	protein S (alpha)	4.267	11.007
207813_s_at	FDXR	ferredoxin reductase	1.219	3.942
207819_s_at	ABCB4	ATP binding cassette subfamily B member 4	1.591	4.66
207826_s_at	ID3	inhibitor of DNA binding 3, HLH protein	3.05	7.7
207828_s_at	CENPF	centromere protein F	1.279	2.439
207853_s_at	SNCB	synuclein beta	-6.336	11.832
207857_at	LILRA2	leukocyte immunoglobulin like receptor A2	1.775	6.248
207876_s_at	FLNC	filamin C	2.847	4.249
207936_x_at	RFPL3	ret finger protein like 3	-1.1	3.387
207961_x_at	MYH11	myosin heavy chain 11	-1.134	1.9
207981_s_at	ESRRG	estrogen related receptor gamma	-1.682	4.421
208002_s_at	ACOT7	acyl-CoA thioesterase 7	-2.75	8.7
208018_s_at	HCK	HCK proto-oncogene, Src family tyrosine kinase	1.808	4.995
208025_s_at	HMGA2	high mobility group AT-hook 2	2.88	4.859
208056_s_at	CBFA2T3	CBFA2/RUNX1 translocation partner 3	-1.888	2.703
208070_s_at	REV3L	REV3 like, DNA directed polymerase zeta catalytic subunit	1.709	3.715
208072_s_at	DGKD	diacylglycerol kinase delta	-1.176	3.84
208078_s_at	SIK1	salt inducible kinase 1	-1.401	2.215
208093_s_at	NDEL1	nudE neurodevelopment protein 1 like 1	-2.129	12.667
208102_s_at	PSD	pleckstrin and Sec7 domain containing	-2.697	6.746
208104_s_at	TSC22D4	TSC22 domain family member 4	1.091	2.934
208123_at	KCNB2	potassium voltage-gated channel subfamily B member 2	-2.101	5.526
208130_s_at	TBXAS1	thromboxane A synthase 1	1.481	5.791
208146_s_at	CPVL	carboxypeptidase, vitellogenic like	2.234	7.483
208147_s_at	CYP2C8	cytochrome P450 family 2 subfamily C member 8	-1.402	4.132
208158_s_at	OSBPL1A	oxysterol binding protein like 1A	-2.071	5.979
208161_s_at	ABCC3	ATP binding cassette subfamily C member 3	5.527	12.375
208165_s_at	PRSS16	protease, serine 16	-1.35	5.492
208206_s_at	RASGRP2	RAS guanyl releasing protein 2	-1.332	4.55
208232_x_at	NRG1	neuregulin 1	-1.11	3.128
208249_s_at	TGDS	TDP-glucose 4,6-dehydratase	1.379	3.535
208253_at	SIGLEC8	sialic acid binding Ig like lectin 8	2.299	5.335
208306_x_at	HLA-DRB1	major histocompatibility complex, class II, DR beta 1	2.85	8.038
208319_s_at	RBM3	RNA binding motif (RNP1, RRM) protein 3	2.823	8.009
208321_s_at	CABP1	calcium binding protein 1	-3.775	6.214
208335_s_at	ACKR1	atypical chemokine receptor 1 (Duffy blood group)	-2.877	3.675
208359_s_at	KCNJ4	potassium voltage-gated channel subfamily J member 4	-5.604	5.174
208370_s_at	RCAN1	regulator of calcineurin 1	1.178	6.27
208394_x_at	ESM1	endothelial cell specific molecule 1	1.576	1.8
208398_s_at	TBPL1	TATA-box binding protein like 1	-1.312	8.328
208451_s_at	C4B_2///C4B///C4A	complement component 4B (Chido blood group), copy 2///complement component 4B (Chido blood group)///complement component 4A (Rodgers blood group)	4.193	9.363
208546_x_at	HIST1H2BH	histone cluster 1, H2bh	-1.013	2.581
208552_at	GRIK4	glutamate ionotropic receptor kainate type subunit 4	1.074	6.933
208567_s_at	LOC100996843///KCNJ18///KCNJ12	ATP-sensitive inward rectifier potassium channel 12-like///potassium voltage-gated channel subfamily J member 18///potassium voltage-gated channel subfamily J member 12	-3.664	9.604
208612_at	PDIA3	protein disulfide isomerase family A member 3	1.293	4.473
208626_s_at	VAT1	vesicle amine transport 1	1.986	4.151
208628_s_at	YBX1	Y-box binding protein 1	1.296	8.823
208636_at	ACTN1	actinin alpha 1	1.091	2.835
208638_at	PDIA6	protein disulfide isomerase family A member 6	1.287	8.406
208659_at	CLIC1	chloride intracellular channel 1	2.764	7.843
208675_s_at	DDOST	dolichyl-diphosphooligosaccharide--protein glycosyltransferase non-catalytic subunit	1.649	8.133
208678_at	ATP6V1E1	ATPase H+ transporting V1 subunit E1	-1.333	10.731
208683_at	CAPN2	calpain 2	1.353	8.583
208690_s_at	PDLIM1	PDZ and LIM domain 1	1.796	2.152
208691_at	TFRC	transferrin receptor	-1.463	6.568
208712_at	CCND1	cyclin D1	3.512	11.266
208716_s_at	TMCO1	transmembrane and coiled-coil domains 1	1.14	7.209
208747_s_at	C1S	complement component 1, s subcomponent	3.131	8.4
208759_at	NCSTN	nicastrin	1.55	4.247
208788_at	ELOVL5	ELOVL fatty acid elongase 5	1.042	7.639
208806_at	CHD3	chromodomain helicase DNA binding protein 3	-1.243	3.107
208812_x_at	HLA-C	major histocompatibility complex, class I, C	1.95	10.188
208813_at	GOT1	glutamic-oxaloacetic transaminase 1	-2.495	9.783
208816_x_at	ANXA2P2	annexin A2 pseudogene 2	2.296	5.801
208818_s_at	COMT	catechol-O-methyltransferase	1.007	6.113
208819_at	RAB8A	RAB8A, member RAS oncogene family	1.086	4.676
208824_x_at	CDK16	cyclin dependent kinase 16	-1.383	4.171
208829_at	TAPBP	TAP binding protein (tapasin)	1.179	4.176
208862_s_at	TMX2-CTNND1///CTNND1	TMX2-CTNND1 readthrough (NMD candidate)///catenin delta 1	1.666	5.109
208868_s_at	GABARAPL1	GABA type A receptor associated protein like 1	-1.4	2.672
208873_s_at	REEP5	receptor accessory protein 5	-1.259	7.771
208877_at	PAK2	p21 (RAC1) activated kinase 2	1.218	6.564
208885_at	LCP1	lymphocyte cytosolic protein 1	1.667	3.664
208890_s_at	PLXNB2	plexin B2	1.451	3.674
208891_at	DUSP6	dual specificity phosphatase 6	1.205	2.223
208894_at	HLA-DRA	major histocompatibility complex, class II, DR alpha	4.022	9.558
208898_at	ATP6V1D	ATPase H+ transporting V1 subunit D	-1.187	9.565
208923_at	CYFIP1	cytoplasmic FMR1 interacting protein 1	1.204	7.491
208932_at	PPP4C	protein phosphatase 4 catalytic subunit	1.243	6.213
208937_s_at	ID1	inhibitor of DNA binding 1, HLH protein	1.456	2.752
208944_at	TGFBR2	transforming growth factor beta receptor 2	2.322	8.451
208949_s_at	LGALS3	lectin, galactoside binding soluble 3	2.144	6.514
208962_s_at	MIR1908///FADS1	microRNA 1908///fatty acid desaturase 1	1.193	5.85
208967_s_at	AK2	adenylate kinase 2	1.273	4.466
208986_at	TCF12	transcription factor 12	2.546	12.229
208991_at	STAT3	signal transducer and activator of transcription 3	1.163	5.956
208998_at	UCP2	uncoupling protein 2	1.722	4.674
209007_s_at	RSRP1	arginine and serine rich protein 1	-1.075	3.128
209035_at	MDK	midkine (neurite growth-promoting factor 2)	2.277	3.51
209040_s_at	PSMB8	proteasome subunit beta 8	4.64	15.746
209074_s_at	FAM107A	family with sequence similarity 107 member A	-1.563	3.536
209081_s_at	COL18A1	collagen type XVIII alpha 1 chain	1.748	4.381
209085_x_at	RFC1	replication factor C subunit 1	1.01	3.908
209093_s_at	GBAP1///GBA	glucosylceramidase beta pseudogene 1///glucosylceramidase beta	1.704	4.684
209108_at	TSPAN6	tetraspanin 6	2.738	12.219
209120_at	NR2F2	nuclear receptor subfamily 2 group F member 2	1.205	1.772
209122_at	PLIN2	perilipin 2	1.715	3.02
209123_at	QDPR	quinoid dihydropteridine reductase	-1.009	3.961
209124_at	MYD88	myeloid differentiation primary response 88	2.493	8.677
209129_at	TRIP6	thyroid hormone receptor interactor 6	1.659	6.515
209130_at	SNAP23	synaptosome associated protein 23	1.569	7.465
209132_s_at	COMMD4	COMM domain containing 4	1.868	7.11
209140_x_at	HLA-B	major histocompatibility complex, class I, B	2.114	12.406
209146_at	MSMO1	methylsterol monooxygenase 1	1.054	3.31
209150_s_at	IPO4///TM9SF1	importin 4///transmembrane 9 superfamily member 1	1.603	10.651
209154_at	P2RX5-TAX1BP3///TAX1BP3	P2RX5-TAX1BP3 readthrough (NMD candidate)///Tax1 binding protein 3	1.048	3.29
209156_s_at	COL6A2	collagen type VI alpha 2 chain	3.234	2.986
209159_s_at	NDRG4	NDRG family member 4	-1.587	8.671
209163_at	CYB561	cytochrome b561	-1.921	3.407
209166_s_at	MAN2B1	mannosidase alpha class 2B member 1	2.208	8.47
209189_at	FOS	Fos proto-oncogene, AP-1 transcription factor subunit	1.899	1.65
209190_s_at	DIAPH1	diaphanous related formin 1	1.032	3.783
209191_at	TUBB6	tubulin beta 6 class V	1.232	2.233
209210_s_at	FERMT2	fermitin family member 2	1.027	7.106
209222_s_at	OSBPL2	oxysterol binding protein like 2	-1.22	6.092
209230_s_at	NUPR1	nuclear protein 1, transcriptional regulator	1.5	2.032
209234_at	KIF1B	kinesin family member 1B	-1.687	11.591
209238_at	STX3	syntaxin 3	-1.629	5.2
209242_at	PEG3	paternally expressed 3	-1.127	5.583
209250_at	DEGS1	delta 4-desaturase, sphingolipid 1	1.111	6.649
209253_at	SORBS3	sorbin and SH3 domain containing 3	1.274	2.715
209259_s_at	SMC3	structural maintenance of chromosomes 3	1.253	4.133
209262_s_at	NR2F6	nuclear receptor subfamily 2 group F member 6	-1.031	4.336
209263_x_at	TSPAN4	tetraspanin 4	1.459	3.806
209275_s_at	CLN3	CLN3, battenin	1.734	4.799
209291_at	ID4	inhibitor of DNA binding 4, HLH protein	1.472	7.058
209295_at	TNFRSF10B	TNF receptor superfamily member 10b	2.379	8.598
209300_s_at	NECAP1	NECAP endocytosis associated 1	-1.621	8.522
209301_at	CA2	carbonic anhydrase 2	-1.232	2.195
209307_at	SWAP70	SWAP switching B-cell complex 70kDa subunit	1.968	6.125
209309_at	AZGP1	alpha-2-glycoprotein 1, zinc-binding	6.796	8.176
209310_s_at	CASP4	caspase 4	1.568	4.354
209311_at	BCL2L2	BCL2 like 2	-1.844	12.174
209312_x_at	LOC101060835///LOC100996809///HLA-DRB5///HLA-DRB4///HLA-DRB1///HLA-DQB1	HLA class II histocompatibility antigen, DQ beta 1 chain-like///HLA class II histocompatibility antigen, DRB1-10 beta chain-like///major histocompatibility complex, class II, DR beta 5///major histocompatibility complex, class II, DR beta 4///major histocompatibility complex, class II, DR beta 1///major histocompatibility complex, class II, DQ beta 1	3.239	8.875
209333_at	ULK1	unc-51 like autophagy activating kinase 1	-2.089	5.842
209341_s_at	IKBKB	inhibitor of kappa light polypeptide gene enhancer in B-cells, kinase beta	1.567	7.001
209343_at	EFHD1	EF-hand domain family member D1	-2.847	5.082
209352_s_at	SIN3B	SIN3 transcription regulator family member B	-1.329	4.153
209357_at	CITED2	Cbp/p300 interacting transactivator with Glu/Asp rich carboxy-terminal domain 2	-1.511	1.694
209360_s_at	LOC101928269///LOC100506403///RUNX1	uncharacterized LOC101928269///uncharacterized LOC100506403///runt related transcription factor 1	3.708	10.029
209364_at	BAD	BCL2 associated agonist of cell death	-1.056	2.589
209365_s_at	ECM1	extracellular matrix protein 1	4.19	6.524
209369_at	ANXA3	annexin A3	-4.372	5.165
209380_s_at	ABCC5	ATP binding cassette subfamily C member 5	-1.986	9.391
209383_at	DDIT3	DNA damage inducible transcript 3	-1.443	3.458
209386_at	TM4SF1	transmembrane 4 L six family member 1	2.618	5.452
209392_at	ENPP2	ectonucleotide pyrophosphatase/phosphodiesterase 2	-3.846	6.582
209395_at	CHI3L1	chitinase 3 like 1	3.704	2.397
209402_s_at	SLC12A4	solute carrier family 12 member 4	1.517	4.928
209403_at	TBC1D3I///TBC1D3E///LOC101060389///TBC1D3L///TBC1D3K///TBC1D3G///TBC1D3H///TBC1D3///TBC1D3C///TBC1D3F	TBC1 domain family member 3I///TBC1 domain family member 3E///TBC1 domain family member-like///TBC1 domain family member 3L///TBC1 domain family member 3K///TBC1 domain family member 3G///TBC1 domain family member 3H///TBC1 domain family member 3///TBC1 domain family member 3C///TBC1 domain family member 3F	-1.106	3.133
209407_s_at	DEAF1	DEAF1, transcription factor	-1.366	5.264
209409_at	GRB10	growth factor receptor bound protein 10	-1.226	7.576
209417_s_at	IFI35	interferon induced protein 35	4.291	8.723
209441_at	RHOBTB2	Rho related BTB domain containing 2	-1.464	2.284
209443_at	SERPINA5	serpin family A member 5	3.681	5.985
209444_at	RAP1GDS1	Rap1 GTPase-GDP dissociation stimulator 1	-1.586	13.142
209447_at	SYNE1	spectrin repeat containing nuclear envelope protein 1	-1.082	3.619
209449_at	LSM2	LSM2 homolog, U6 small nuclear RNA and mRNA degradation associated	1.459	5.143
209454_s_at	TEAD3	TEA domain transcription factor 3	1.028	5.75
209462_at	APLP1	amyloid beta precursor like protein 1	-2.294	5.923
209468_at	LRP5	LDL receptor related protein 5	2.828	4.76
209473_at	ENTPD1	ectonucleoside triphosphate diphosphohydrolase 1	1.726	4.72
209476_at	TMX1	thioredoxin related transmembrane protein 1	1.71	8.235
209479_at	CCDC28A	coiled-coil domain containing 28A	-1.403	7.454
209493_at	PDZD2	PDZ domain containing 2	1.448	2.353
209496_at	RARRES2	retinoic acid receptor responder 2	2.635	5.739
209530_at	CACNB3	calcium voltage-gated channel auxiliary subunit beta 3	-3.229	6.133
209536_s_at	EHD4	EH domain containing 4	2.795	8.099
209539_at	ARHGEF6	Rac/Cdc42 guanine nucleotide exchange factor 6	3.267	12.118
209545_s_at	RIPK2	receptor interacting serine/threonine kinase 2	1.256	2.388
209551_at	YIPF4	Yip1 domain family member 4	1.132	2.686
209556_at	NCDN	neurochondrin	-3.085	9.843
209558_s_at	HIP1R	huntingtin interacting protein 1 related	1.508	2.326
209561_at	THBS3	thrombospondin 3	1.991	7.253
209568_s_at	RGL1	ral guanine nucleotide dissociation stimulator like 1	-1.149	6.937
209570_s_at	NSG1	neuron specific gene family member 1	-2.666	5.018
209575_at	IL10RB	interleukin 10 receptor subunit beta	2.119	8.946
209583_s_at	CD200	CD200 molecule	-1.448	8.103
209584_x_at	APOBEC3C	apolipoprotein B mRNA editing enzyme catalytic subunit 3C	1.204	3.823
209590_at	BMP7	bone morphogenetic protein 7	2.097	5.411
209596_at	MXRA5	matrix remodeling associated 5	5.403	9.51
209598_at	PNMA2	paraneoplastic Ma antigen 2	-1.168	3.863
209606_at	CYTIP	cytohesin 1 interacting protein	2.351	7.62
209608_s_at	ACAT2	acetyl-CoA acetyltransferase 2	1.282	4.065
209610_s_at	SLC1A4	solute carrier family 1 member 4	-1.025	3.614
209619_at	CD74	CD74 molecule	3.277	6.163
209628_at	NXT2	nuclear transport factor 2 like export factor 2	1.624	6.678
209631_s_at	SEL1L2///GPR37	SEL1L2 ERAD E3 ligase adaptor subunit///G protein-coupled receptor 37	-3.77	4.676
209644_x_at	CDKN2A	cyclin dependent kinase inhibitor 2A	3.52	7.08
209649_at	STAM2	signal transducing adaptor molecule 2	1.145	4.003
209651_at	TGFB1I1	transforming growth factor beta 1 induced transcript 1	4.027	8.756
209656_s_at	TMEM47	transmembrane protein 47	-1.385	2.977
209679_s_at	SMAGP	small cell adhesion glycoprotein	1.285	2.943
209684_at	RIN2	Ras and Rab interactor 2	2.633	8.883
209685_s_at	PRKCB	protein kinase C beta	-2.976	6.062
209700_x_at	PDE4DIP	phosphodiesterase 4D interacting protein	-1.407	2.902
209717_at	EVI5	ecotropic viral integration site 5	1.271	3.107
209726_at	CA11	carbonic anhydrase 11	-2.543	5.806
209728_at	HLA-DRB4	major histocompatibility complex, class II, DR beta 4	4.547	3.494
209732_at	CLEC2B	C-type lectin domain family 2 member B	2.968	5.648
209734_at	NCKAP1L	NCK associated protein 1 like	2.491	6.548
209735_at	ABCG2	ATP binding cassette subfamily G member 2 (Junior blood group)	1.874	4.105
209736_at	SOX13	SRY-box 13	2.394	5.875
209755_at	NMNAT2	nicotinamide nucleotide adenylyltransferase 2	-3.378	6.542
209757_s_at	MYCN	v-myc avian myelocytomatosis viral oncogene neuroblastoma derived homolog	1.729	4.132
209760_at	KIAA0922	KIAA0922	1.494	6.677
209761_s_at	SP110	SP110 nuclear body protein	2.981	8.478
209765_at	ADAM19	ADAM metallopeptidase domain 19	-1.138	2.842
209768_s_at	SEPT5-GP1BB	SEPT5-GP1BB readthrough	-1.897	5.133
209770_at	BTN3A1	butyrophilin subfamily 3 member A1	2.467	8.08
209771_x_at	CD24	CD24 molecule	-3.872	5.734
209781_s_at	KHDRBS3	KH RNA binding domain containing, signal transduction associated 3	1.225	3.613
209782_s_at	DBP	D-box binding PAR bZIP transcription factor	-2.039	6.23
209785_s_at	PLA2G4C	phospholipase A2 group IVC	-1.175	3.519
209786_at	HMGN4	high mobility group nucleosomal binding domain 4	1.467	4.294
209788_s_at	ERAP1	endoplasmic reticulum aminopeptidase 1	1.44	2.836
209789_at	CORO2B	coronin 2B	-3.234	8.192
209790_s_at	CASP6	caspase 6	2.534	10.257
209794_at	SRGAP3	SLIT-ROBO Rho GTPase activating protein 3	-2.105	7.125
209795_at	CD69	CD69 molecule	3.077	6.509
209815_at	PTCH1	patched 1	1.102	2.164
209821_at	IL33	interleukin 33	2.018	3.497
209824_s_at	ARNTL	aryl hydrocarbon receptor nuclear translocator like	-1.989	12.265
209829_at	FAM65B	family with sequence similarity 65 member B	-2.586	3.487
209831_x_at	DNASE2	deoxyribonuclease 2, lysosomal	1.027	3.452
209834_at	CHST3	carbohydrate sulfotransferase 3	3.337	9.803
209839_at	DNM3	dynamin 3	-2.273	4.831
209842_at	SOX10	SRY-box 10	4.101	7.008
209846_s_at	BTN3A2	butyrophilin subfamily 3 member A2	4.945	12.662
209861_s_at	METAP2	methionyl aminopeptidase 2	1.129	8.409
209866_s_at	ADGRL3	adhesion G protein-coupled receptor L3	1.312	4.964
209869_at	ADRA2A	adrenoceptor alpha 2A	-4.436	11.613
209875_s_at	SPP1	secreted phosphoprotein 1	1.626	2.096
209877_at	SNCG	synuclein gamma	-4.042	10.61
209879_at	SELPLG	selectin P ligand	2.37	6.018
209883_at	COLGALT2	collagen beta(1-O)galactosyltransferase 2	1.389	6.114
209884_s_at	SLC4A7	solute carrier family 4 member 7	1.272	6.087
209894_at	LEPROT///LEPR	leptin receptor overlapping transcript///leptin receptor	1.283	2.563
209906_at	C3AR1	complement component 3a receptor 1	1.837	5.031
209911_x_at	HIST1H2BD	histone cluster 1, H2bd	-2.157	5.624
209913_x_at	MIR4656///AP5Z1	microRNA 4656///adaptor related protein complex 5 zeta 1 subunit	-1.216	3.926
209931_s_at	MFSD2B///FKBP1B	major facilitator superfamily domain containing 2B///FK506 binding protein 1B	-1.814	3.136
209933_s_at	CD300A	CD300a molecule	2.342	4.07
209939_x_at	CFLAR	CASP8 and FADD like apoptosis regulator	1.1	4.23
209948_at	KCNMB1	potassium calcium-activated channel subfamily M regulatory beta subunit 1	1.471	2.01
209949_at	NCF2	neutrophil cytosolic factor 2	1.44	3.172
209956_s_at	CAMK2B	calcium/calmodulin dependent protein kinase II beta	-4.581	11.976
209960_at	HGF	hepatocyte growth factor	3.056	7.56
209975_at	CYP2E1	cytochrome P450 family 2 subfamily E member 1	-3.29	8.32
209988_s_at	ASCL1	achaete-scute family bHLH transcription factor 1	3.957	10.021
209990_s_at	GABBR2	gamma-aminobutyric acid type B receptor subunit 2	-2.516	4.844
209998_at	PIGO	phosphatidylinositol glycan anchor biosynthesis class O	1.643	8.398
210004_at	OLR1	oxidized low density lipoprotein receptor 1	3.531	5.34
210010_s_at	SLC25A1	solute carrier family 25 member 1	1.956	6.047
210016_at	MYT1L	myelin transcription factor 1 like	-7.659	10.983
210033_s_at	SPAG6	sperm associated antigen 6	-1.787	1.807
210038_at	PRKCQ	protein kinase C theta	-2.326	2.856
210040_at	SLC12A5	solute carrier family 12 member 5	-9.74	19.672
210041_s_at	PGM3	phosphoglucomutase 3	1.97	9.712
210052_s_at	TPX2	TPX2, microtubule nucleation factor	1.345	2.466
210053_at	TAF5	TATA-box binding protein associated factor 5	-1.338	2.604
210056_at	RND1	Rho family GTPase 1	-2.655	5.335
210059_s_at	MAPK13	mitogen-activated protein kinase 13	-1.374	5.467
210102_at	VWA5A	von Willebrand factor A domain containing 5A	2.543	6.125
210123_s_at	LOC101930361///LOC101929970///CHRFAM7A///CHRNA7	uncharacterized LOC101930361///CHRNA7-FAM7A fusion protein///CHRNA7 (exons 5-10) and FAM7A (exons A-E) fusion///cholinergic receptor nicotinic alpha 7 subunit	-3.439	7.02
210130_s_at	TM7SF2	transmembrane 7 superfamily member 2	1.283	4.197
210132_at	EFNA3	ephrin A3	-2.68	8.908
210138_at	RGS20	regulator of G-protein signaling 20	-3.552	5.117
210145_at	PLA2G4A	phospholipase A2 group IVA	1.446	2.376
210152_at	LILRB4	leukocyte immunoglobulin like receptor B4	1.885	5.557
210166_at	TLR5	toll like receptor 5	1.876	3.451
210169_at	SEC14L5	SEC14 like lipid binding 5	-5.536	13.342
210174_at	NR5A2	nuclear receptor subfamily 5 group A member 2	1.9	5.715
210176_at	TLR1	toll like receptor 1	4.093	12.574
210185_at	CACNB1	calcium voltage-gated channel auxiliary subunit beta 1	-2.05	5.31
210193_at	MOBP	myelin-associated oligodendrocyte basic protein	-3.562	5.641
210221_at	CHRNA3	cholinergic receptor nicotinic alpha 3 subunit	-2.754	5.967
210227_at	DLGAP2	DLG associated protein 2	-5.191	2.785
210240_s_at	CDKN2D	cyclin dependent kinase inhibitor 2D	-3.507	6.994
210246_s_at	ABCC8	ATP binding cassette subfamily C member 8	-1.657	1.757
210252_s_at	MADD	MAP kinase activating death domain	-2.154	11.284
210260_s_at	TNFAIP8	TNF alpha induced protein 8	2.164	6.705
210261_at	KCNK2	potassium two pore domain channel subfamily K member 2	2.871	5.431
210275_s_at	ZFAND5	zinc finger AN1-type containing 5	-1.09	6.499
210292_s_at	PCDH11Y///PCDH11X	protocadherin 11 Y-linked///protocadherin 11 X-linked	-4.258	4.597
210331_at	HECW1	HECT, C2 and WW domain containing E3 ubiquitin protein ligase 1	-1.685	1.995
210341_at	MYT1	myelin transcription factor 1	4.273	6.43
210371_s_at	RBBP4	RB binding protein 4, chromatin remodeling factor	1.218	6.925
210381_s_at	CCKBR	cholecystokinin B receptor	-3.681	5.341
210387_at	HIST1H2BJ///HIST1H2BG	histone cluster 1, H2bj///histone cluster 1, H2bg	-2.35	6.753
210400_at	GRIN2C	glutamate ionotropic receptor NMDA type subunit 2C	-3.966	10.092
210408_s_at	CPNE6	copine 6	-6.243	8.943
210414_at	FLRT1	fibronectin leucine rich transmembrane protein 1	1.261	2.109
210445_at	FABP6	fatty acid binding protein 6	-4.513	12.016
210448_s_at	P2RX5	purinergic receptor P2X 5	-3.764	3.135
210454_s_at	KCNJ6	potassium voltage-gated channel subfamily J member 6	-4.972	11.572
210512_s_at	VEGFA	vascular endothelial growth factor A	1.151	1.685
210540_s_at	B4GALT4	beta-1,4-galactosyltransferase 4	2.103	11.904
210573_s_at	POLR3C	RNA polymerase III subunit C	1.11	3.232
210580_x_at	SLX1B-SULT1A4///SLX1A-SULT1A3///SULT1A4///SULT1A3	SLX1B-SULT1A4 readthrough (NMD candidate)///SLX1A-SULT1A3 readthrough (NMD candidate)///sulfotransferase family 1A member 4///sulfotransferase family 1A member 3	-1.534	5.799
210605_s_at	MFGE8	milk fat globule-EGF factor 8 protein	2.358	5.857
210607_at	FLT3LG	fms related tyrosine kinase 3 ligand	1.708	8.045
210609_s_at	TP53I3	tumor protein p53 inducible protein 3	3.212	8.369
210629_x_at	LST1	leukocyte specific transcript 1	1.835	6.228
210644_s_at	LAIR1	leukocyte associated immunoglobulin like receptor 1	2.738	6.984
210657_s_at	45173	septin 4	-2.116	3.836
210675_s_at	PTPRR	protein tyrosine phosphatase, receptor type R	-6.046	14.503
210690_at	KLRC4	killer cell lectin like receptor C4	1.57	4.185
210705_s_at	TRIM5	tripartite motif containing 5	2.687	7.757
210715_s_at	SPINT2	serine peptidase inhibitor, Kunitz type 2	-3.163	9.063
210720_s_at	NECAB3	N-terminal EF-hand calcium binding protein 3	-2.672	8.557
210721_s_at	PAK5	p21 (RAC1) activated kinase 5	-3.201	3.344
210782_x_at	GRIN1	glutamate ionotropic receptor NMDA type subunit 1	-1.785	6.258
210788_s_at	DHRS7	dehydrogenase/reductase 7	1.484	10.459
210809_s_at	POSTN	periostin	8.664	10.999
210813_s_at	XRCC4	X-ray repair cross complementing 4	1.496	5.935
210844_x_at	CTNNA1	catenin alpha 1	1.228	8.823
210845_s_at	PLAUR	plasminogen activator, urokinase receptor	1.646	2.234
210879_s_at	RAB11FIP5	RAB11 family interacting protein 5	-1.874	7.982
210944_s_at	CAPN3	calpain 3	-2.375	2.635
210970_s_at	IBTK	inhibitor of Bruton tyrosine kinase	1.016	4.337
210977_s_at	HSF4	heat shock transcription factor 4	-1.252	3.85
211006_s_at	KCNB1	potassium voltage-gated channel subfamily B member 1	-1.354	2.134
211012_s_at	PML	promyelocytic leukemia	1.543	5.724
211028_s_at	KHK	ketohexokinase	-1.727	2.854
211034_s_at	HECTD4	HECT domain E3 ubiquitin protein ligase 4	-2.426	10.823
211043_s_at	CLTB	clathrin light chain B	-1.017	6.345
211048_s_at	PDIA4	protein disulfide isomerase family A member 4	1.525	5.09
211066_x_at	PCDHGA1///PCDHGA2///PCDHGA3///PCDHGA4///PCDHGA5///PCDHGA6///PCDHGA7///PCDHGA9///PCDHGA10///PCDHGA11///PCDHGB1///PCDHGB2///PCDHGB3///PCDHGB5///PCDHGB6///PCDHGB7///PCDHGC4///PCDHGC5///PCDHGA12///PCDHGA8///PCDHGB4///PCDHGC3	protocadherin gamma subfamily A, 1///protocadherin gamma subfamily A, 2///protocadherin gamma subfamily A, 3///protocadherin gamma subfamily A, 4///protocadherin gamma subfamily A, 5///protocadherin gamma subfamily A, 6///protocadherin gamma subfamily A, 7///protocadherin gamma subfamily A, 9///protocadherin gamma subfamily A, 10///protocadherin gamma subfamily A, 11///protocadherin gamma subfami…	1.52	4.428
211071_s_at	MLLT11	myeloid/lymphoid or mixed-lineage leukemia; translocated to, 11	-1.43	10.031
211149_at	UTY	ubiquitously transcribed tetratricopeptide repeat containing, Y-linked	-1.316	1.835
211163_s_at	TNFRSF10C	TNF receptor superfamily member 10c	1.028	3.234
211167_s_at	GCK	glucokinase	-1.659	3.077
211208_s_at	CASK	calcium/calmodulin dependent serine protein kinase	1.146	6.15
211248_s_at	CHRD	chordin	-1.384	2.776
211282_x_at	TNFRSF25	TNF receptor superfamily member 25	-1.473	1.863
211336_x_at	LILRB1	leukocyte immunoglobulin like receptor B1	2.115	10.172
211340_s_at	MIR6756///MCAM	microRNA 6756///melanoma cell adhesion molecule	1.141	2.993
211368_s_at	CASP1	caspase 1	2.998	9.791
211385_x_at	SULT1A2	sulfotransferase family 1A member 2	-1.209	6.804
211395_x_at	FCGR2C	Fc fragment of IgG receptor IIc (gene/pseudogene)	1.425	1.7
211429_s_at	SERPINA1	serpin family A member 1	2.825	5.524
211430_s_at	MIR8071-2///MIR8071-1///IGHV4-31///IGHM///IGHG2///IGHG1	microRNA 8071-2///microRNA 8071-1///immunoglobulin heavy variable 4-31///immunoglobulin heavy constant mu///immunoglobulin heavy constant gamma 2 (G2m marker)///immunoglobulin heavy constant gamma 1 (G1m marker)	3.231	4.053
211458_s_at	GABARAPL3///GABARAPL1	GABA type A receptor associated protein like 3 pseudogene///GABA type A receptor associated protein like 1	-1.745	9.707
211474_s_at	SERPINB6	serpin family B member 6	1.986	9.537
211499_s_at	MAPK11	mitogen-activated protein kinase 11	-1.958	5.587
211529_x_at	HLA-G	major histocompatibility complex, class I, G	2.269	11.714
211535_s_at	FGFR1	fibroblast growth factor receptor 1	1.485	4.175
211600_at	PTPRO	protein tyrosine phosphatase, receptor type O	-1.249	4.935
211656_x_at	LOC101060835///HLA-DQB1	HLA class II histocompatibility antigen, DQ beta 1 chain-like///major histocompatibility complex, class II, DQ beta 1	2.6	4.881
211675_s_at	MDFIC	MyoD family inhibitor domain containing	1.16	2.325
211693_at	IGH	immunoglobulin heavy locus	-1.313	4.394
211715_s_at	BDH1	3-hydroxybutyrate dehydrogenase, type 1	-1.704	3.791
211719_x_at	FN1	fibronectin 1	1.453	3.775
211721_s_at	ZNF551	zinc finger protein 551	1.237	3.34
211733_x_at	SCP2	sterol carrier protein 2	1.194	7.368
211734_s_at	FCER1A	Fc fragment of IgE receptor Ia	1.499	3.228
211737_x_at	PTN	pleiotrophin	1.02	4.64
211742_s_at	EVI2B	ecotropic viral integration site 2B	3.791	7.535
211748_x_at	PTGDS	prostaglandin D2 synthase	-1.806	2.334
211751_at	LOC101930416///LOC101929792///LOC100996724///LOC653513///PDE4DIP	myomegalin-like///uncharacterized LOC101929792///phosphodiesterase 4D interacting protein-like///phosphodiesterase 4D interacting protein-like///phosphodiesterase 4D interacting protein	-2.415	4.549
211756_at	PTHLH	parathyroid hormone like hormone	-2.094	2.894
211761_s_at	CACYBP	calcyclin binding protein	-1.348	8.538
211795_s_at	FYB	FYN binding protein	2.576	5.307
211796_s_at	TRBC1	T cell receptor beta constant 1	-2.338	3.225
211876_x_at	PCDHGA3///PCDHGA5///PCDHGA6///PCDHGA10///PCDHGA11///PCDHGA12///PCDHGC3	protocadherin gamma subfamily A, 3///protocadherin gamma subfamily A, 5///protocadherin gamma subfamily A, 6///protocadherin gamma subfamily A, 10///protocadherin gamma subfamily A, 11///protocadherin gamma subfamily A, 12///protocadherin gamma subfamily C, 3	3.083	2.625
211896_s_at	DCN	decorin	1.64	2.343
211926_s_at	MYH9	myosin, heavy chain 9, non-muscle	1.214	3.54
211931_s_at	HNRNPA3///HNRNPA3P1	heterogeneous nuclear ribonucleoprotein A3///heterogeneous nuclear ribonucleoprotein A3 pseudogene 1	1.395	9.555
211945_s_at	ITGB1	integrin subunit beta 1	1.767	8.767
211959_at	IGFBP5	insulin like growth factor binding protein 5	2.291	7.039
211964_at	COL4A2	collagen type IV alpha 2 chain	2.265	4.894
211967_at	TMEM123	transmembrane protein 123	1.54	5.767
211980_at	COL4A1	collagen type IV alpha 1 chain	1.997	3.684
211988_at	SMARCE1	SWI/SNF related, matrix associated, actin dependent regulator of chromatin, subfamily e, member 1	1.135	11.686
211990_at	HLA-DPA1	major histocompatibility complex, class II, DP alpha 1	3.296	5.966
211996_s_at	LOC101060275///NPIPA5///NPIPB5///NPIPB11///LOC613037///NPIPB4///NPIPB3	putative NPIP-like protein LOC613037///nuclear pore complex interacting protein family member A5///nuclear pore complex interacting protein family member B5///nuclear pore complex interacting protein family member B11///nuclear pore complex interacting protein member///nuclear pore complex interacting protein family member B4///nuclear pore complex interacting protein family member B3	-1.228	2.104
212012_at	PXDN	peroxidasin	3.983	9.096
212063_at	CD44	CD44 molecule (Indian blood group)	3.646	7.466
212067_s_at	C1R	complement C1r subcomponent	4.253	13.261
212070_at	ADGRG1	adhesion G protein-coupled receptor G1	1.316	9.427
212094_at	PEG10	paternally expressed 10	-1.285	4.804
212097_at	CAV1	caveolin 1	3.567	9.194
212121_at	TCTN3	tectonic family member 3	1.65	6.933
212127_at	RANGAP1	Ran GTPase activating protein 1	-1.533	8.096
212134_at	MIR6716///PHLDB1	microRNA 6716///pleckstrin homology like domain family B member 1	1.523	4.213
212136_at	ATP2B4	ATPase plasma membrane Ca2+ transporting 4	1.176	3.908
212146_at	PLEKHM2	pleckstrin homology and RUN domain containing M2	-1.014	4.336
212149_at	EFR3A	EFR3 homolog A	-1.296	5.154
212168_at	RBM12	RNA binding motif protein 12	1.511	8.667
212169_at	FKBP9	FK506 binding protein 9	1.114	3.974
212190_at	SERPINE2	serpin family E member 2	1.018	4.26
212204_at	TMEM87A	transmembrane protein 87A	1.062	4.6
212213_x_at	OPA1	OPA1, mitochondrial dynamin like GTPase	-1.635	7.71
212215_at	PREPL	prolyl endopeptidase-like	-1.198	8.736
212221_x_at	IDS	iduronate 2-sulfatase	-1.534	11.205
212222_at	PSME4	proteasome activator subunit 4	-1.091	3.509
212224_at	ALDH1A1	aldehyde dehydrogenase 1 family member A1	-5.538	11.789
212242_at	TUBA4A	tubulin alpha 4a	-3.505	11.524
212252_at	CAMKK2	calcium/calmodulin dependent protein kinase kinase 2	-3.537	7.202
212256_at	GALNT10	polypeptide N-acetylgalactosaminyltransferase 10	3.04	8.838
212285_s_at	AGRN	agrin	1.238	2.581
212288_at	FNBP1	formin binding protein 1	-1.589	4.778
212294_at	GNG12	G protein subunit gamma 12	2.951	11.914
212297_at	ATP13A3	ATPase 13A3	1.165	5.092
212298_at	NRP1	neuropilin 1	2.914	5.565
212300_at	TXLNA	taxilin alpha	1.687	7.485
212322_at	SGPL1	sphingosine-1-phosphate lyase 1	1.604	9.007
212326_at	VPS13D	vacuolar protein sorting 13 homolog D	-1.269	5.823
212328_at	LIMCH1	LIM and calponin homology domains 1	-1.584	7.025
212334_at	GNS	glucosamine (N-acetyl)-6-sulfatase	1.713	9.751
212338_at	MYO1D	myosin ID	-1.475	1.95
212345_s_at	CREB3L2	cAMP responsive element binding protein 3 like 2	2.878	10.839
212349_at	POFUT1	protein O-fucosyltransferase 1	1.473	5.599
212352_s_at	TMED10	transmembrane p24 trafficking protein 10	1.103	10.15
212354_at	SULF1	sulfatase 1	4.225	8.868
212358_at	CLIP3	CAP-Gly domain containing linker protein 3	-1.2	5.792
212360_at	AMPD2	adenosine monophosphate deaminase 2	-1.595	11.608
212377_s_at	NOTCH2	notch 2	1.333	6.728
212378_at	GART	phosphoribosylglycinamide formyltransferase, phosphoribosylglycinamide synthetase, phosphoribosylaminoimidazole synthetase	1.682	8.104
212383_at	ATP6V0A1	ATPase H+ transporting V0 subunit a1	-1.444	5.22
212388_at	USP24	ubiquitin specific peptidase 24	1.293	4.366
212396_s_at	EMC1	ER membrane protein complex subunit 1	1.119	3.672
212397_at	RDX	radixin	1.71	8.405
212406_s_at	PCMTD2	protein-L-isoaspartate (D-aspartate) O-methyltransferase domain containing 2	1.233	4.486
212412_at	PDLIM5	PDZ and LIM domain 5	1.633	10.626
212414_s_at	GLYR1///SEPT6	glyoxylate reductase 1 homolog///septin 6	2.666	5.692
212418_at	ELF1	E74 like ETS transcription factor 1	1.963	10.273
212423_at	ZCCHC24	zinc finger CCHC-type containing 24	2.284	6.816
212434_at	GRPEL1	GrpE like 1, mitochondrial	-1.057	7.546
212442_s_at	CERS6	ceramide synthase 6	-1.148	3.735
212456_at	CLUH	clustered mitochondria homolog	-1.349	5.506
212460_at	SPTSSA	serine palmitoyltransferase small subunit A	1.106	3.392
212473_s_at	MICAL2	microtubule associated monooxygenase, calponin and LIM domain containing 2	-6.281	8.151
212474_at	AVL9	AVL9 cell migration associated	-1.397	6.822
212476_at	ACAP2	ArfGAP with coiled-coil, ankyrin repeat and PH domains 2	1.229	3.057
212482_at	RMND5A	required for meiotic nuclear division 5 homolog A	-2.08	8.466
212499_s_at	MAPK1IP1L///FCF1	mitogen-activated protein kinase 1 interacting protein 1 like///FCF1 rRNA-processing protein	1.636	4.592
212508_at	MOAP1	modulator of apoptosis 1	-1.662	10.385
212518_at	PIP5K1C	phosphatidylinositol-4-phosphate 5-kinase type 1 gamma	-1.525	5.241
212526_at	SPG20	spastic paraplegia 20 (Troyer syndrome)	1.071	2.609
212530_at	NEK7	NIMA related kinase 7	1.03	3.718
212533_at	WEE1	WEE1 G2 checkpoint kinase	4.257	10.046
212543_at	AIM1	absent in melanoma 1	5.947	10.877
212552_at	HPCAL1	hippocalcin like 1	-2.67	13.93
212554_at	CAP2	CAP, adenylate cyclase-associated protein, 2 (yeast)	-2.741	5.914
212558_at	SPRY1	sprouty RTK signaling antagonist 1	2.683	5.952
212573_at	ENDOD1	endonuclease domain containing 1	1.519	5.895
212586_at	CAST	calpastatin	1.154	5.82
212588_at	PTPRC	protein tyrosine phosphatase, receptor type C	3.097	6.111
212599_at	AUTS2	autism susceptibility candidate 2	-2.406	7.914
212611_at	DTX4	deltex E3 ubiquitin ligase 4	-1.359	6.46
212620_at	ZNF609	zinc finger protein 609	-1.017	1.982
212624_s_at	CHN1	chimerin 1	-3.37	8.262
212628_at	PKN2	protein kinase N2	1.181	4.76
212633_at	UFL1	UFM1 specific ligase 1	1.631	2.552
212642_s_at	HIVEP2	human immunodeficiency virus type I enhancer binding protein 2	-2.818	9.615
212647_at	RRAS	related RAS viral (r-ras) oncogene homolog	1.064	3.293
212657_s_at	IL1RN	interleukin 1 receptor antagonist	1.574	3.789
212658_at	LHFPL2	lipoma HMGIC fusion partner-like 2	2.785	10.827
212664_at	TUBB4A	tubulin beta 4A class IVa	-3.419	5.084
212666_at	SMURF1	SMAD specific E3 ubiquitin protein ligase 1	-1.272	5.138
212670_at	ELN	elastin	2.272	2.358
212671_s_at	LOC100509457///HLA-DQA2///HLA-DQA1	HLA class II histocompatibility antigen, DQ alpha 1 chain-like///major histocompatibility complex, class II, DQ alpha 2///major histocompatibility complex, class II, DQ alpha 1	5.655	7.332
212680_x_at	PPP1R14B	protein phosphatase 1 regulatory inhibitor subunit 14B	2.061	7.072
212681_at	EPB41L3	erythrocyte membrane protein band 4.1 like 3	-1.106	2.508
212686_at	PPM1H	protein phosphatase, Mg2+/Mn2+ dependent 1H	-3.652	9.776
212687_at	LIMS4///LIMS3///LIMS1	LIM zinc finger domain containing 4///LIM zinc finger domain containing 3///LIM zinc finger domain containing 1	2.187	10.795
212688_at	PIK3CB	phosphatidylinositol-4,5-bisphosphate 3-kinase catalytic subunit beta	-1.386	12.648
[truncated: 2,945 more rows]

## Sheet: MED
Differentially Expressed Genes in MED (Figure A4d)
[truncated: 2,691 more rows]

[truncated: 5 more sheets: PNET, MEN, ACM, ODG, GBM]
